# Supplementary material
Source: Research Square preprint supplement (doi:10.21203/rs.3.rs-8785596/v1)
Supplement: Supplementary file 1 [file 6829c293be4c626dd9d30de0.docx]

**Table 1. Analysis of the demographics and semen parameters of study participants.**

| Characteristics | Infertile men(19) | Fertile men(12) | *P*-value |
| --- | --- | --- | --- |
| Age(year) | 31(5.5) | 35(2.0) | 0.021 |
| Body mass index (kg/m2) | 24.8(3.7) | 23.5(1.7) | 0.184 |
| Nation |  |  | 0.510 |
| Han | 17(89.5) | 12(100) |  |
| Zang | 2(10.5) | 0(0) |  |
| Smoking status |  |  | 0.029 |
| Never smoker | 11(57.9) | 12(100) |  |
| Ex-smoker | 2(10.5) | 0(0) |  |
| Current smoker | 6(31.6) | 0(0) |  |
| Alcohol use |  |  | 0.252 |
| None | 10(52.6) | 3(25.0) |  |
| Social | 9(47.4) | 9(75.0) |  |
| Semen analysis |  |  |  |
| Abstinence period(day) | 4.1(1.3) | 3.8(1.4) | 0.469 |
| Semen volume(ml) | 4.3(1.7) | 3.5(1.2) | 0.185 |
| Sperm concentration(million/ml) | 47.4(42.6) | 78.6(31.9) | 0.038 |
| Total sperm count(million) | 112(232.2) | 258.1(239.6) | 0.150 |
| PR(A+B)% | 38.0(34.0) | 59.5(23.8) | 0.003 |
| Round cell(million/ml) | 0.4(0.4) | 0.2(0.2) | 0.015 |
| Forward sperm motility |  |  |  |
| VCL (µm/s) | 76.6(13.1) | 61.0(12.6) | 0.004 |
| VSL (µm/s) | 32.8(6.9) | 28.5(8.3) | 0.148 |
| ALH (µm/s) | 5.9(1.0) | 4.0(0.8) | ＜0.001 |
| LIN (%) | 43.6(9.7) | 50.1(6.8) | 0.059 |
| STR (%) | 68.6(10.2) | 89.1(3.8) | ＜0.001 |
| VAP (µm/s) | 47.8(6.6) | 33.4(7.9) | ＜0.001 |
| BCF (times/s) | 14.3(2.3) | 7.5(0.4) | ＜0.001 |
| PR=Progressive motility; VCL= Curvilinear Velocity; VSL= Straight-line Velocity; ALH= Amplitude of Lateral Head Displacement; LIN= Linearity; STR= Straightness Ratio; VAP= Average Path Velocity; BCF= Beat Cross Frequency.  Data are presented as mean (sd), n (%) or median (IQR). | | | |
