# Supplementary material
Source: Research Square preprint supplement (doi:10.21203/rs.3.rs-8785596/v1)
Supplement: Supplementary file 1 [file 19000fa3f2c4a50a0c1738ec.xlsx]

## Sheet: KEGG富集统计表_MetabsetEnrich_DEMs_2
Num	First Category	Second Category	Pathway Description		Pathway_ID	Database	Enrich Factor	DA Score	Ratio_in_study	Ratio_in_pop	P_value	P_adjust
1	Drug Development	Chronology: Antiinfectives	Penicillins		map07011	KEGG PATHWAY	0.5	-0.5	1/102	2/6572	0.0308	0.1955
1	Drug Development	Chronology: Antiinfectives	Cephalosporins - oral agents		map07013	KEGG PATHWAY	1	1	1/102	1/6572	0.01552	0.1416
2	Environmental Information Processing	Signal transduction	HIF-1 signaling pathway		map04066	KEGG PATHWAY	0.13333333333333	0.25	2/102	15/6572	0.02196	0.1603
2	Environmental Information Processing	Signal transduction	AMPK signaling pathway		map04152	KEGG PATHWAY	0.090909090909091	0.5	2/102	22/6572	0.04504	0.2268
3	Metabolism	Amino acid metabolism	Glycine, serine and threonine metabolism		map00260	KEGG PATHWAY	0.0625	-0.0625	3/102	48/6572	0.03794	0.2052
3	Metabolism	Amino acid metabolism	Lysine biosynthesis		map00300	KEGG PATHWAY	0.085714285714286	-0.09091	3/102	35/6572	0.01658	0.1424
3	Metabolism	Amino acid metabolism	Histidine metabolism		map00340	KEGG PATHWAY	0.063829787234043	-0.1579	3/102	47/6572	0.03597	0.202
3	Metabolism	Amino acid metabolism	Phenylalanine metabolism		map00360	KEGG PATHWAY	0.061224489795918	0.05263	3/102	49/6572	0.03998	0.2084
3	Metabolism	Amino acid metabolism	Alanine, aspartate and glutamate metabolism		map00250	KEGG PATHWAY	0.10714285714286	0.05882	3/102	28/6572	0.008973	0.08734
3	Metabolism	Carbohydrate metabolism	Galactose metabolism		map00052	KEGG PATHWAY	0.065217391304348	0.08333	3/102	46/6572	0.03404	0.1988
3	Human Diseases	Cancer: overview	Central carbon metabolism in cancer		map05230	KEGG PATHWAY	0.081081081081081	0.1364	3/102	37/6572	0.01925	0.1561
3	Metabolism	Energy metabolism	Other carbon fixation pathways		map00720	KEGG PATHWAY	0.068181818181818	0.25	3/102	44/6572	0.03036	0.2015
3	Organismal Systems	Endocrine system	Glucagon signaling pathway		map04922	KEGG PATHWAY	0.11538461538462	0.3	3/102	26/6572	0.007282	0.07595
3	Metabolism	Carbohydrate metabolism	Citrate cycle (TCA cycle)		map00020	KEGG PATHWAY	0.15	0.375	3/102	20/6572	0.003415	0.04533
4	Metabolism	Biosynthesis of other secondary metabolites	Biosynthesis of various alkaloids		map00996	KEGG PATHWAY	0.051282051282051	-0.1111	4/102	78/6572	0.03254	0.1979
4	Metabolism	Metabolism of terpenoids and polyketides	Brassinosteroid biosynthesis		map00905	KEGG PATHWAY	0.13793103448276	-0.8	4/102	29/6572	0.000964	0.02346
4	Metabolism	Metabolism of other amino acids	D-Amino acid metabolism		map00470	KEGG PATHWAY	0.057971014492754	0	4/102	69/6572	0.0219	0.1683
4	Metabolism	Carbohydrate metabolism	Ascorbate and aldarate metabolism		map00053	KEGG PATHWAY	0.087719298245614	0.09091	5/102	57/6572	0.001803	0.02924
4	Metabolism	Biosynthesis of other secondary metabolites	Flavonoid biosynthesis		map00941	KEGG PATHWAY	0.054054054054054	0.1333	4/102	74/6572	0.0275	0.1912
4	Metabolism	Chemical structure transformation maps	Biosynthesis of alkaloids derived from histidine and purine		map01065	KEGG PATHWAY	0.11428571428571	0.2353	4/102	35/6572	0.001979	0.02889
5	Metabolism	Amino acid metabolism	Lysine degradation		map00310	KEGG PATHWAY	0.089285714285714	-0.1154	5/102	56/6572	0.001665	0.03038
5	Metabolism	Chemical structure transformation maps	Biosynthesis of alkaloids derived from terpenoid and polyketide		map01066	KEGG PATHWAY	0.10416666666667	0.1765	5/102	48/6572	0.000823	0.03004
5	Metabolism	Chemical structure transformation maps	Biosynthesis of plant hormones		map01070	KEGG PATHWAY	0.073529411764706	0.2273	5/102	68/6572	0.003924	0.04775
6	Metabolism	Biosynthesis of other secondary metabolites	Tropane, piperidine and pyridine alkaloid biosynthesis		map00960	KEGG PATHWAY	0.083333333333333	-0.2069	6/102	72/6572	0.000823	0.02403
7	Metabolism	Amino acid metabolism	Arginine and proline metabolism		map00330	KEGG PATHWAY	0.098591549295775	0.03704	7/102	71/6572	0.000104	0.005059
7	Metabolism	Chemical structure transformation maps	Biosynthesis of alkaloids derived from shikimate pathway		map01063	KEGG PATHWAY	0.048951048951049	0.07317	7/102	143/6572	0.006588	0.07399
8	Metabolism	Chemical structure transformation maps	Biosynthesis of plant secondary metabolites		map01060	KEGG PATHWAY	0.056737588652482	0	8/102	141/6572	0.001477	0.03081
9	Metabolism	Chemical structure transformation maps	Biosynthesis of alkaloids derived from ornithine, lysine and nicotinic acid		map01064	KEGG PATHWAY	0.13432835820896	-0.03226	9/102	67/6572	7.421E-7	5.417E-5
13	Metabolism	Chemical structure transformation maps	Biosynthesis of phenylpropanoids		map01061	KEGG PATHWAY	0.12264150943396	0.09434	13/102	106/6572	6.733E-9	9.83E-7
