# Supplementary material
Source: Research Square preprint supplement (doi:10.21203/rs.3.rs-8785596/v1)
Supplement: Supplementary file 3 [file 685f9f0aa248bb2ba53db9a1.xlsx]

## Sheet: exp_diff_download_express
Metabolite	P_value	FDR	VIP_pred_OPLS-DA	VIP_PLS-DA	FC(Infertile2/Fertile2)	Log2FC(Infertile2/Fertile2)	Significant	Regulate	M/Z	Retention time	Adducts	Formula	Fragmentation Score	Theoretical Fragmentation Score	infertile2_mean	infertile2_SD	fertile2_mean	fertile2_SD	Infertile_1	Infertile_2	Infertile_3	Infertile_4	Infertile_5	Infertile_6	Infertile_7	Infertile_8	Infertile_9	Infertile_10	Infertile_11	Infertile_12	Infertile_13	Infertile_14	Infertile_15	Infertile_16	Infertile_17	Infertile_18	Infertile_19	Infertile_20	Infertile_21	Infertile_22	Infertile_23	Fertile_1	Fertile_2	Fertile_3	Fertile_4	Fertile_5	Fertile_6	Fertile_7	Fertile_8
Ceftibuten	1.445e-05	0.004794	4.0746	3.397	0.3896	-1.3599	yes	down	445.006	1.7884	M+Cl	C15H14N4O6S2	0	56.7	1.276	1.094	3.275	0.9522	0.5127404094393117	3.0746224309489305	0.45437085502398106	3.3357888176202986	0.6189912427629007	3.605358475874937	0.5606827738970229	2.8758878857904384	0.3866693793714847	1.1630531116656284	0.5069991798233959	0.4342237882267165	2.5523573318022357	3.547105770610665	0.5806291915693955	3.254283839482357	0.5689717715594769	0.5164070336306714	0.5357997440964911	2.425656397188701	3.077450752057764	0.5245430943944307	2.8762812991355897	3.3955274868770458	2.7410996232873894	0.4255629102556467	3.2262727938891893	3.0601862567574267	2.7224922262664486	3.5390256224705667	2.93756413092522
2,3,23-Triacetylsericic Acid	0.0005017999999999999	0.04817	4.0016	2.9787	0.4434	-1.1733	yes	down	675.369	5.7224	M+FA-H	C36H54O9	0	43.4	1.696	1.5830000000000002	3.825	1.276	0.4374301005064821	3.8523853721810895	0.3842717624977159	1.0387120888160726	3.498033586703343	3.571258661683685	0.4815466000219202	0.4800480374603384	1.93915020114471	0.5065855031004487	0.4321735849965857	0.3660761388224016	2.9676437089515137	4.081721264234212	3.043291130166643	0.4770763452618733	3.3137915628897314	0.4407902201202258	0.4586007417417141	0.5235473549751648	4.048126917506279	0.4482545774984462	4.608290165736404	3.3294563839054465	3.992864162323656	4.040759961912885	4.781519137001932	4.931321883417672	0.4105833324672564	3.3415528726337143	3.9549582852186633
Rheochrysidin	0.001519	0.08405	3.574	2.5364	1.7832	0.8345	yes	up	283.061	5.8986	M-H	C16H12O5	87.6	0	4.285	1.1159999999999999	2.403	1.8869999999999998	4.355439268692204	0.6764323447990809	3.724093965863397	3.762139066949093	4.562282739580835	3.4382602539580884	5.023707370829704	5.156828311715637	4.265069644852623	3.6589825434686296	3.5544376728656166	4.515266355481042	5.59594009540095	3.4188740208403354	4.612245607172596	2.9433871930089284	5.4741551466418095	4.354611712923992	3.938579782088546	3.1823390959214737	5.411329713109647	4.146017983157277	5.205361663570215	0.6985358342550385	3.5849873672846746	4.525384484546919	0.6161504966887656	4.31722571013245	3.851870238114136	0.6050695982614852	0.6410939490048696
N-[4-[4-(4-Methylquinolin-2-Yl)Piperazin-1-Yl]Sulfonylphenyl]Acetamide	0.002581	0.1039	3.5695	3.9339999999999997	0.5615	-0.8327	yes	down	425.163	1.0452	M+H	C22H24N4O3S	95.1	0	2.4619999999999997	1.7690000000000001	4.385	1.215	1.1014082944894494	6.3192951100574195	1.2153691325421188	1.1119021617206553	1.1958255788512653	3.1439093986863167	1.2028061041174078	4.074030558371891	5.0809654171453875	3.923825444145346	1.2460353263408896	4.398590829347762	1.0906298958928715	1.1984112402590814	1.1919504630933275	1.2336344221179818	1.2579399209367064	1.2605825283829677	4.152751700108541	1.2999687347284057	1.0720547657742057	4.459815374967588	1.2294242009216458	4.031178699458299	5.4268419754597845	3.1540361019396745	4.651287599018827	5.217003017353472	3.380070025253928	1.227065002681072	3.855567828822004
Kaempferide	4.017e-05	0.0103	3.5406	2.6551	1.4455	0.5316	yes	up	299.056	5.9789	M-H	C16H12O6	75	0	4.867	0.8578	3.367	0.8139	4.418437491703612	3.3803732524541905	5.848109455096657	3.1080368755110737	2.631009618180656	4.078451085036049	5.137728466456215	3.7107015731622135	4.874693057285876	5.029707889161957	5.92467430069403	5.158887528620105	5.2313228976160016	2.480494203489524	5.820106074510299	3.0590550660121765	4.989795230634355	5.229485450886238	5.184941970327887	4.9517381703165	5.423903248441079	4.2122167660702265	5.3109751890442585	2.6816150355353354	2.4314010697578947	4.279841939671035	2.576155682946553	3.53477074616979	4.0899576537328795	2.5615159448821734	2.608687493647569
Phaseic Acid	6.301e-06	0.002693	3.4531	2.8833	0.7185	-0.4769	yes	down	325.129	5.8344	M+FA-H	C15H20O5	0	46	3.696	0.7121	5.144	0.7164	3.5777789607655417	3.4644614050539286	5.0277457516313335	3.799317893533441	3.3140755507711237	4.3802002334471295	3.0627198142327297	3.6759921527438397	2.2586310321949354	3.5618105728780827	3.1171330102244705	3.8632325213171934	4.264482817902602	5.436808302490525	3.957562615995617	3.9766993095445735	3.8607444079812807	4.7375055146376335	3.8655576594616416	3.9009467742696073	2.5612544679643587	3.3170894929385284	4.8297402995864935	5.344763577878688	3.6959646262690096	3.5009036576072137	5.257818366232167	4.687943821095368	4.926289665242721	5.3575574330385285	5.171105562849626
Dipropyl Hexanedioate	7.814e-05	0.01576	3.4249	2.6879	0.7183	-0.4774	yes	down	505.299	6.7249	2M+FA-H	C12H22O4	0	41.4	3.929	0.8727	5.47	0.9675	4.6999023468786225	4.2420403658471235	2.3967574279535486	5.909338343373902	4.0125006069326	3.8027858035878457	4.232929093777386	3.8559018246469656	2.28795537722514	4.7166551531447904	4.902487493820383	3.4639527912112813	3.097786451091668	6.463840294305196	4.150160499883067	4.761835322417329	3.8336454299045775	5.017936770857145	4.526824060294448	3.018580848117457	3.707149461424317	3.0724107615641247	5.406279700230397	4.081825279016824	4.870083089277425	4.0272168820178615	6.303961466147375	6.368172798898189	3.991410803503237	6.189423435991987	6.209809560940228
Isorhamnetin	5.25e-05	0.01257	3.3274	2.3945	1.3359999999999999	0.418	yes	up	315.051	5.9895	M-H	C16H12O7	95.7	0	5.443	0.7204	4.074	0.8771	4.8089813083242525	5.45909025580605	6.023240428177132	3.876723262329002	3.1899159394693486	3.682366121791744	5.851409543986695	4.423167805675858	5.6860755898444335	5.328715694411779	6.132473779708045	5.433126769809537	5.674367251850599	3.45357288994862	5.478354609436506	3.737129420773144	5.406648861775202	6.028074711969535	6.405149602509701	5.241802556284065	5.9053526167071775	5.1584946621914725	5.777254299540736	3.2492074596036407	4.081854981246565	3.75129421406016	3.134962772980464	4.657913721334356	4.946042515784456	3.120294359039056	3.296413767757861
Dermorphin	0.002297	0.09982	3.2576	2.238	1.4268	0.5128	yes	up	767.349	5.7825	M+H-2H2O	C40H50N8O10	0	46.8	5.3389999999999995	0.9355	3.742	1.729	5.076907585594053	4.307019485026222	4.6302473305231615	4.115861282414424	3.9733742107261856	2.6329055545595264	4.662957152503278	4.44151951177394	5.802754460514962	6.445717717976737	6.362919675515298	6.190488005375276	5.256531988537402	3.8202092597800004	4.016310357280208	0.8279641845764107	5.0322703463079534	5.897303824565929	7.242683205902297	5.546948079470887	6.019086486050818	6.123234901783173	4.407126330110722	0.790335273888165	4.759262347219698	4.7132731601290505	4.207041889803664	3.8311217159934254	5.883948879112216	0.8220284812045555	1.8867080272559191
Pralnacasan	0.001675	0.08903	3.1018	2.3708	0.5704	-0.8101	yes	down	568.205	5.5568	M+FA-H	C26H29N5O7	0	54.7	2.0469999999999997	1.147	3.589	1.2990000000000002	2.804146831698556	3.0270688961935246	3.311649534237608	0.7170497923647087	0.7777905262821474	0.7957207585027215	3.1170173407021684	2.4750107109926143	0.5146168890291283	0.743356643435065	2.17209108629898	2.9574924883327327	0.6455629552039562	0.6559618870666994	0.7355227289164403	0.7080032358478756	1.1212578332223837	2.672151747940126	3.037401823475308	3.9370808152646948	0.7458872999039667	1.1685603525915975	2.92864907059596	4.168041234175538	1.9153794681116647	3.1194920918983864	3.995525227755553	4.18761339571492	2.658745483540801	3.1260826891245657	4.26083670779736
Gly Asp Gln	0.0003945	0.04104	3.053	2.1069999999999998	1.3267	0.4079	yes	up	319.124	0.634	M+H	C11H18N4O7	52.5	0	5.092	0.4163	3.838	1.272	4.3038454225386165	4.5211842907985424	4.766972799736854	2.4551415700498644	5.136603519015188	2.6160157054734285	4.810009395782154	5.296759449552903	5.194129995641462	5.621146604821242	5.3362058964688055	5.610921126940641	4.960885227626699	4.2685664129930325	5.050306234186152	2.5852803505724364	4.9827036142213545	5.514667642594248	4.613236125856536	5.619340778962719	4.655944063949468	5.733926691227717	5.023737748252332	2.540857708359842	5.203899719064669	4.2320404384088794	2.6085566152916746	4.623497109313479	5.646895575311612	2.578318521922104	2.5678019230222304
Diferuloyl Putrescine	0.009927	0.151	3.0511	2.0952	2.0769	1.0544	yes	up	485.194	4.2847	M+FA-H	C24H28N2O6	43.3	0	3.053	1.3659999999999999	1.47	1.8230000000000002	3.1131716358184747	2.2434712631401097	0.033591149704741134	1.221702270312211	0.05596991231272005	0.05861838961256	3.1710115904334994	3.3569415471164548	2.6598436390388267	3.3553185170869075	3.933367906748744	3.0488760934327725	3.4604279655856045	0.04027270570260889	1.2131526238655197	2.5243068838007416	2.721414942600278	4.323372329662012	4.865397681102015	4.447702381458528	4.171006370260042	4.407939468219479	3.4190802771270854	0.06242668915170195	0.0361283167283693	0.030381374481397657	0.04967899606380196	0.045545961744495184	4.765921034328139	0.04811601032457267	0.053324782814799264
2',5,6',7-Tetrahydroxyflavone	0.0001158	0.02122	3.0434	2.2084	1.263	0.3368	yes	up	285.04	5.9417	M-H	C15H10O6	63.6	0	5.768	0.6103	4.567	0.8953	5.283332737125959	5.0385139945289525	6.941101612940242	5.371554057081228	4.704488432281875	5.454077948317976	5.8414720897319325	4.804666346193428	5.7325695816288444	5.65852872750266	6.3828679247011575	5.844565397993362	6.034089182445957	3.864928304884872	5.3676238126221785	4.39822413045292	5.416907264174569	5.769842070511534	6.431862839306534	5.974808107433772	6.880605597439217	5.845637433256651	5.634412871073704	4.075560555183683	4.620171611559432	4.574701485534058	3.1241647863388087	5.740189088288412	5.431626009764596	3.716831509228233	4.10320491604569
3-Hydroxyheptadecanoylcarnitine	0.01287	0.1611	3.0165	2.0303	0.6126	-0.7069	yes	down	410.327	6.4154	M-H2O-H	C24H47NO5	0	47.4	2.475	1.886	4.04	0.9699	0.8131170108884862	5.840367952705248	4.685343503037671	4.210760762237547	5.0076989619439525	5.0925982538567744	2.0704639079860456	1.2158736837776678	0.6534119592219455	4.8374215976301045	0.8060951782319093	0.7151285745313909	0.7977688046953845	4.978992060925128	2.70850732405224	5.910660217991564	3.636606048857709	4.804002359151352	0.8411170753334121	4.374320199597263	1.5030491444862255	0.8274883378113771	0.8781352074202113	4.4749498564876795	4.959415651148861	4.474821936479113	4.915645707112433	2.459733301621718	1.9120548262139951	4.513760728475613	4.191085622794123
Tomatidine	0.002693	0.1053	3.0142	2.3186	0.7191	-0.4758	yes	down	416.352	6.0142	M+H	C27H45NO2	67.1	0	3.77	1.082	5.242999999999999	1.412	2.8905555791124025	5.096669669183597	4.022035923370996	5.673061546863616	5.3242664669645645	6.440221370514577	4.15029424502281	4.470070616214161	4.210735722426321	4.225227880921963	4.213957056103202	4.5564220556290325	1.2304322038361355	3.06079929101862	3.36784971898628	6.584328480758356	3.2038018070708723	3.700048880722017	4.179401202508783	4.575599468713754	3.2140499557000046	1.2885885798728274	3.7045534147072203	2.7413453766431326	5.574612902174062	5.435392418741858	6.689308023442984	5.797171409136275	4.1476838224874015	6.560951147764228	5.424701084617177
Glu-Phe-Tyr	0.0061979999999999995	0.1324	2.9816	2.0705	1.5143	0.5987	yes	up	456.173	1.7884	M-H	C23H27N3O7	74.7	0	4.328	1.236	2.858	1.5190000000000001	3.3363096375542884	3.6244813689608812	5.11430410298012	0.00015230932820617867	0.0001805946731160066	0.0001897286743247546	4.054650275198832	5.9750290038558935	4.546023250395097	4.884454735173311	4.506259552379702	4.661993393584243	4.5278974393827225	4.715936593706607	3.9947215164707637	1.3566509330425411	5.137832026384132	4.735569103316924	4.022545288062932	4.894202002982956	3.8213689318870765	5.526784446064976	4.87054581131868	2.3521642046478064	4.08433627098232	3.706345578534594	2.8718081286832486	4.351142126235469	4.61103231014312	3.2849747702130085	0.00017152745539638208
Gravolenic Acid	0.005765999999999999	0.1306	2.9519	2.0925	0.6307	-0.665	yes	down	261.074	4.0067	M-H2O-H	C14H16O6	0	48.8	2.449	1.5530000000000002	3.883	0.7317	3.1491755543663187	4.132525946983753	2.751532687436266	4.705501360852255	3.880668433298669	4.180048388459029	3.668501077773021	3.7188986480259127	2.7503628655739742	0.0038300988154385523	3.3791746634058857	0.002296548546673576	3.561381860083473	4.042794663060252	3.0914714775971435	4.681210606064432	2.7873425907938305	3.695808101038936	2.7527044448570384	3.2027783537354684	0.0038572935742616655	0.003133478018035529	0.0035869227361906343	4.484038884769098	3.923807575622581	3.294967829809152	4.338310326982257	4.291946769621543	1.998378784382844	4.540878120949871	4.181766402920132
4'-Methylepicatechin 7-Sulfate	0.01384	0.16399999999999998	2.9422	1.9980000000000002	1.6684	0.7385	yes	up	383.044	4.4877	M-H	C16H16O9S	0	41.4	3.864	1.274	2.316	2.028	3.5081626078441017	0.3927932415008042	2.308688983160353	0.337755495732714	2.236322186687894	0.4046917422169901	4.6183793004392575	4.504587394965516	3.423609869482425	5.185822765830622	4.5681834769435525	3.5429235249035105	4.2067090271937655	3.541790301003392	5.525412599507779	0.33172552503383795	2.881413585857548	4.308000013034198	5.708393266357106	4.06406333925801	3.540093565924418	4.735339161123205	4.159439304772832	4.203420279966915	0.2741077574503777	4.873443452126593	0.34812976780606925	0.3266224883013332	5.0103445681757615	1.5659707448006668	2.290482360383047
Ganoderiol C	0.0028239999999999997	0.1076	2.9339999999999997	2.0737	0.7513	-0.4126	yes	down	577.41	6.3783	M+Hac-H	C32H54O5	0	68.3	4.283	1.4	5.7010000000000005	0.6753	5.077398795104866	4.6494459731267765	4.122525666560635	6.041363553548112	5.350177346233043	5.95083512895298	4.307975891252994	5.3988946905049175	2.0035540964129757	4.652789048946588	3.84519027422686	3.4231434502006604	0.7068291165308829	5.730014943153657	5.693749609824662	6.3369741618267845	5.6935073387545545	5.41071958533496	3.686869672557042	5.113336951897239	5.3457149533612105	1.9958957469309675	4.905316455962116	5.892467626439139	5.287627096647427	4.794937185761566	6.551787254383452	6.090981353915112	4.9625320241140916	6.7015689913496574	5.894075565186663
Val-Tyr-Arg	0.0107	0.1527	2.9273	2.2012	0.5279	-0.9218	yes	down	495.26	5.749	M+Hac-H	C20H32N6O5	74.2	0	1.8090000000000002	1.383	3.427	1.922	3.1387110087742967	2.0579550184952926	0.33133877906925024	4.047548885071933	3.3201081877588696	3.319344135065464	1.907426220403473	2.570984299028545	0.2764379687784049	3.7689308850928778	1.4281608026135488	0.3148330622656212	3.9435823121257534	4.452149317634075	0.4377215646586313	4.6839843276623965	0.4277009717412408	0.3830012812784619	2.8475756165092783	0.459619402150072	3.4217078790465307	2.900174109509541	0.4257340648809028	3.3669746509890697	1.4903760419723864	0.3077804616758351	6.179179446155413	3.150009970786391	0.35531777930645325	3.408195175447315	3.60217635669035
Penitrem D	0.002561	0.1039	2.8932	2.1851	0.7295	-0.4551	yes	down	600.37	5.3501	M+CH3OH+H	C37H45NO4	0	51.9	3.5810000000000004	1.018	4.909	1.2009999999999998	3.7724557860976207	5.430564319556563	2.4354890093515285	2.3248427118618995	4.205778978038467	4.740776447768459	2.4221484514207385	2.4706717991736293	2.291120118462555	3.3329916684987446	4.115273618047061	2.357314667683909	3.662742932800892	5.0297793713861525	3.668020416438405	2.4548430249938904	4.387983683540176	3.1489160154458378	4.039617054793732	2.52474833549532	5.068047604780785	3.392772414244472	5.311964318969702	5.202801807769457	2.37087320611564	4.427733081344998	5.409812669951206	5.900886588695671	3.7225078133812017	5.487055499594467	3.2320837920533645
P-Coumaroyl 3-Hydroxytyrosine	0.013980000000000001	0.1643	2.8734	2.6869	0.5724	-0.8049	yes	down	344.116	3.6119	M+H	C18H17NO6	0	47.4	2.1430000000000002	1.926	3.7439999999999998	1.094	4.259746420570569	3.0600568580271963	0.024552820201657444	3.471780191218324	0.02343282588752092	3.9281738445101366	3.7243255978676544	0.02656991450439403	0.017723271686862996	3.61061106317208	3.0833823958480053	0.02058785926798579	0.01815981009346713	4.26320753079499	0.02321634439294856	3.8079040532204576	4.315651623480769	0.02733296016538441	4.700269266416953	4.593934931651115	3.3085954891402336	2.831479280930795	3.044825166951738	3.828699387959413	3.3037788286926166	0.014478929655493756	2.6194904845735016	3.3124021267499586	4.0649033772385605	6.782563999594313	4.0216089097850105
Aloe-Emodin	0.001483	0.08405	2.843	1.9922	1.2643	0.3383	yes	up	269.045	5.9895	M-H	C15H10O5	76.1	0	5.621	0.9484	4.446000000000001	0.8356	5.391983014578967	3.4689564925752205	6.6631424345287575	5.242507599113405	3.774623654920081	4.5650685479043265	6.104355083566773	4.7600333812207465	5.593536084935646	4.707352132065928	6.576674351811137	6.3785502846169875	6.6822893270937405	4.038605018908658	5.522816963063566	3.3608830842574733	5.010356407203999	6.059557711643269	6.072531841230303	5.652612033648155	6.915227894989959	5.498319405639911	5.964147353073874	3.863134870474084	4.114993929359256	5.590997053191593	3.3910939664333286	5.429025665803257	5.012492586203057	3.5505923301181888	4.248366864557478
Theaflavic Acid	0.006587000000000001	0.135	2.8418	2.3441	1.3609	0.4445	yes	up	409.06	0.5792	M-H2O-H	C21H16O10	0	45.7	5.008	1.2	3.68	1.2790000000000001	5.905208160029647	3.7803760644330064	4.972908775526523	3.4963118956791672	3.4799135037085134	2.7481238667859595	2.6271487139721708	6.0893623364091205	2.36411903511536	5.374860431868608	5.422629424886799	5.0673696338414835	5.22035955793309	2.554923314504621	5.552159054007834	3.70865189575262	5.809274705897211	5.477336925862524	5.121097683202248	4.04653081425148	6.36244126307475	6.501883270478892	5.979537622007352	2.7561282760652324	3.163688434397016	2.4279196547641604	3.1199298050907065	6.5336266441712505	3.2633373460260486	2.6359836855636067	2.6831746189674535
Phe-Met-Leu	0.010190000000000001	0.151	2.8384	2.7643	0.6429	-0.6373	yes	down	432.19	3.6332	M+Na	C20H31N3O4S	35	0	2.571	1.5519999999999998	3.9989999999999997	1.137	0.8084244732488746	2.6142531662999016	0.9140027700169217	0.8180587341472059	4.764847760790528	0.9584174731800176	4.6202684236943465	0.945156603144242	3.2228454467012746	3.616790611002272	4.106334535595754	0.8458752002014629	3.3995253111550787	0.8981666631124443	0.8921441425782944	0.9311047378742421	3.684882095972656	3.167842435539641	4.56732302645537	0.9935806139494802	3.898202635893413	0.8508719322605691	0.9271586176989268	4.66356400757226	3.081352938243746	1.4687290384990908	4.546419096206527	4.604944480868988	4.08481038941391	4.625071063996041	4.5451834922365855
9-[(2,3-Dimethoxyphenyl)Methyl]-1-Oxa-9-Azaspiro[5.5]Undecan-4-Ol	0.01732	0.1747	2.8289	2.2764	0.6018	-0.7325	yes	down	322.199	4.9279	M+H	C18H27NO4	86.4	0	2.414	1.845	4.011	1.4809999999999999	0.5578862613824149	0.5982509059645829	2.658885740619393	3.8958719036978433	2.800755766996283	5.3216040864693746	3.3039352900084564	3.610305353507508	0.5417275399649821	0.6924203178810266	2.6331273470616865	4.9741516853455465	0.5494433453938612	6.386025548708588	0.6305274797416441	5.334734541932979	5.101434486280251	0.6874796533733438	5.316666057755125	2.6251016823618865	5.6364354618000725	0.5944853698994894	2.343624192198665	5.570566299321718	3.3429397087704134	0.4799191634839724	5.738427041454103	5.771508386013478	3.0355172419408785	4.106574511693228	0.6512619300120334
Eujambolin	0.0004294	0.043519999999999996	2.8206	2.4572	1.3175	0.3978	yes	up	555.095	4.7333	M+Cl	C24H24O13	0	48	4.648	0.6647	3.528	0.9042	4.9531611886220475	5.199367031644983	4.0662350261490765	3.5298349442008035	5.6161401903947725	4.508875567262223	4.152055879162904	4.882729655207097	4.5514471323953085	4.54323259845196	4.824520954242768	4.070901784941962	4.683287950069388	3.1014417260773963	2.843773831525146	1.6833861997340454	4.68389457215315	5.128922637772011	4.316811784638245	5.429505661094304	5.4537507459238865	5.033852615395366	3.881406387570858	4.4055504383034165	4.590587894830745	5.169314908326792	3.651460577359044	3.164682886695755	4.518300165703288	3.0500409618286786	4.1593511707142135
Suspensolide F	0.01168	0.1569	2.8068	1.9343	1.5185	0.6027	yes	up	496.241	3.0667	M+NH4	C21H34O12	0	41.5	4.135	1.3159999999999998	2.7230000000000003	1.581	2.9516086945791806	1.3229841497533446	4.278142083527668	1.281667007260893	4.029173821936472	3.6696470140929	1.3747880597933966	6.48216576382622	4.79547736714791	4.747373793065315	4.811936860154316	5.188434591596206	4.131480303663756	2.5560425505949564	4.171452393730241	2.551518376257873	4.343956030869235	5.474195501962688	3.2632242526191417	5.485537256876314	3.0878975218883102	4.9219729664993865	3.69444966270852	2.010078187231009	4.741585639823756	4.583404014081646	1.4287096054956392	3.942235718089836	4.866229338745655	1.3995626524871594	1.3894430236982571
Leu-Glu-Asp	0.005005	0.1274	2.7903	2.0233	1.5232	0.6071	yes	up	376.171	2.3753	M+H	C15H25N3O8	61.9	0	3.8689999999999998	1.0290000000000001	2.54	1.406	1.34978049575497	4.109859381155124	2.8903118525591003	1.3606624731829455	4.68301776721368	3.1706426682941187	3.7800074208899934	4.149992754721104	4.115729765930584	4.504849476102866	4.749924029937279	4.5952385767470325	3.9618938745458454	2.7858529628002446	4.423094675478112	1.4862548182314652	4.272399132870904	4.8735728084928605	4.032068662033931	4.544983807301851	2.7126442446433927	4.275830423385502	1.4819288672380346	1.4432387028500098	4.693938368937542	3.5777818851881737	1.5088479344505146	3.2231348565342146	4.757493354897531	1.4795043140002715	1.4693132356504783
5-S-Cysteinyl-D-Dopa	0.005790999999999999	0.1306	2.7672	1.9112	0.7173	-0.4794	yes	down	317.083	0.5704	M+H	C12H16N2O6S	0	47.1	3.255	1.278	4.538	0.9583	2.033974912661868	4.342776978082038	5.049444403186757	3.5724359907424788	4.623944767927592	5.2472264373190995	2.142186368676543	4.622711757373538	2.011683508230456	2.2093230331533444	5.019536124679501	4.9245441838928965	2.0223669603285708	5.4655925384675035	4.300220328157449	4.508320892209318	3.802912193000798	2.203153230429438	2.1838225637093363	4.1017699553382085	2.0023090496219527	2.0833667667764773	2.170330051434954	5.5529791795830326	3.72787498018666	1.9232095956735795	5.175956947489123	4.859186804875914	2.213612413269839	5.518475481076047	5.299829745215258
Cer(21:2_3O/15:0_(2Oh))	0.011340000000000001	0.1561	2.7605	2.0134	0.6788	-0.559	yes	down	640.516	6.7142	M+FA-H	C36H69NO5	85.3	0	3.089	1.749	4.551	0.8116	1.9791283327937643	4.157205012074207	4.557176960422848	3.5835139963467384	4.073510314489764	4.581269070445601	4.648087032552911	4.586928910819942	0.4023683049449229	1.83566248377209	4.449577147628924	4.458222084124606	0.5183756022791174	4.708367929997147	0.6001787070056654	6.361247764157455	3.5835890003793467	4.860033378019236	0.5546082057192746	4.492212329874528	3.172872971241969	0.9188273804168308	4.8494656181762785	4.902486236547175	3.9671358313495566	4.214106017665408	5.7284786458079155	3.021799735814656	3.6668109625253953	5.131128715159688	5.051057776625776
(E)-Zeatin Glucoside	0.013080000000000001	0.1618	2.7531	1.8795	1.4676	0.5534	yes	up	414.198	1.7599	M+CH3OH+H	C16H23N5O6	0	55.6	4.2780000000000005	1.3459999999999999	2.915	1.48	3.1324241264374386	4.127403166888229	4.234955993125051	0.8006733617231336	0.8778490044945404	0.9401529317977482	4.745022735260007	5.380321442462754	4.9700728950315805	4.4667966540715724	5.660415815511749	5.926750778116017	3.4551500594226927	4.3744114705944535	4.46038710488876	3.6866361962873113	4.2525924060395965	4.56023821110966	4.57272585621558	4.632686989926932	1.1420948793975425	5.26520293170691	5.4241905767337375	3.3725556927547014	1.398177562812816	2.7733547333383846	1.814645637944608	4.2567537307531325	5.471988929297424	2.837157944677236	2.295997315044452
5-Hydroxypentanoic Acid	0.00019969999999999998	0.02963	2.7517	2.1077	0.8275	-0.2732	yes	down	160.096	0.6023	M+ACN+H	C5H10O3	0	73	4.787	0.5368	5.785	0.7719	4.8337713077328965	5.262225742639916	4.995958544488203	5.158967289259123	4.24893002474193	5.4498568266216445	4.639478941459919	4.882912341173745	3.816117821841055	4.493704956790731	3.9936776435528873	5.037899631162008	6.143395978670378	5.958545936337737	4.961764048999623	5.715884422292994	5.109747423544332	4.571675988741216	4.7136160287519004	4.788512266263332	4.42230780737301	4.470706250105001	5.571151151163157	5.610525585885665	5.507189215499556	3.726693357478004	6.79877733134848	7.104264336564247	4.365205666972543	6.194237427835808	5.230161174665657
Jaceosidin	9.417e-05	0.01818	2.7447	2.0492	1.2496	0.3215	yes	up	329.067	5.9736	M-H	C17H14O7	91.4	0	4.886	0.479	3.91	0.7248	4.763998037521484	4.446628050086879	5.142811655584564	5.842778843635489	3.617773193631245	4.5975631944987665	5.2101054339792165	4.851781619346721	5.313871464886655	4.426874510396124	4.725013827192192	4.910127981749514	4.820674126979411	3.515996480094371	5.062191222694431	4.7127930677225445	5.893095347873846	4.499743927880866	4.881535530626212	4.835953415817354	5.218487797072783	4.712767461284133	5.502001209671942	4.1684653485028536	3.3754295801112035	4.176984409663653	3.103880413714428	4.2006463650240775	4.22012807680329	3.0892128115874447	3.1364708748595325
2',7-Dihydroxy-4'-Methoxy-8-Prenylflavan 2',7-Diglucoside	0.02588	0.1971	2.7312	2.6238	0.684	-0.5479	yes	down	723.293	3.4729	M+Hac-H	C33H44O14	0	55.8	3.048	1.635	4.456	1.6130000000000002	0.580097560164596	5.618386894443528	4.017238932886498	5.156663621751505	0.6923083376685754	2.3039904824315114	2.9402795463866123	4.391818379799767	3.695746307421123	3.866222444414353	3.3937455505759595	4.497743765471318	2.789128102901544	3.1826209003841446	0.6519696022319592	4.3184508437632445	3.999909866007322	3.5274712203566625	3.570434983599928	3.0697376841640143	0.6618444405444585	5.304166694818536	0.6372531254781807	3.8595926330619874	5.976485430700843	0.4867292166660372	5.011897173266648	5.376084954159642	0.5487660404466429	2.9912791847875244	4.854843184258558
P-Coumaric Acid Sulfate	0.001507	0.08405	2.6858	1.8409	1.2772	0.353	yes	up	262.038	1.6012	M+NH4	C9H8O6S	0	47.4	4.852	0.7354	3.799	0.9311	4.664920080096239	2.9936556056539274	3.859735717319309	2.519882758827864	3.930687691231113	3.2757649423534225	4.205329097274676	5.462340203792484	5.2924583804217455	5.437483422792601	5.706063197698461	4.517337509426937	4.858037240986327	4.973274937878628	5.0188087387524805	2.6500763349044343	4.923815045869193	5.309092746312624	5.270253626512427	5.695549198041728	4.8782849998327595	5.7925168294639695	4.371591942638799	4.529084371029025	4.8921650611589405	4.809469046690934	2.673360783163306	3.45593657428312	5.230453076080684	2.9956024959951617	2.6325914672595823
[4-Hydroxy-2,3-Bis[(4-Hydroxy-3-Methoxyphenyl)Methyl]Butyl] Hydrogen Sulfate	0.004732	0.1263	2.6777	2.0238	1.4112	0.4969	yes	up	441.122	4.9154	M-H	C20H26O9S	41.1	0	4.077	0.6429	2.889	1.4980000000000002	4.209242797566159	3.891125101889483	3.5251577807470085	1.2544894613281177	2.8478811112901936	1.345120297890381	3.848717005733208	4.212060219450335	4.147592343843075	3.879716518117621	3.4735864783541333	4.708628334339928	3.5626027339435216	3.4252694371308943	5.016577344769856	1.2438996653288543	4.809159554116048	5.157186595903173	4.855824423695331	3.811458173478629	3.414178599794087	3.4402870484539902	4.6461129908392165	4.0831300583710295	1.1363550099184017	5.059921767890788	2.284414540295533	1.234849500808396	5.195025400446503	1.2585722308604763	3.0955967510865645
2-Hydroxy-6-[(8Z,11Z)-Pentadeca-8,11-Dienyl]Benzoic Acid	0.0392	0.2285	2.6766	2.7265	0.5214	-0.9394	yes	down	343.227	6.6554	M-H	C22H32O3	99	0	1.7269999999999999	2.075	3.312	1.8459999999999999	1.9044601951514504	1.927826966237849	1.5740262988349412	0.3603230851832746	0.14387180202111627	0.24225056132390355	6.247658751188389	4.328094790386814	0.0005095885388812579	1.6712499239914758	0.0007853270383081178	3.5373764606818585	0.0007676673213685768	0.0007916858591673581	0.0009957279711047592	5.418666382574054	0.0009600017379990047	3.8352552957711614	5.737701132823077	0.0010767181323633195	0.0010251600487184522	1.8939051403049367	0.0009530850862054273	2.1148619559382147	4.406340373741598	2.061725763492801	1.928545018012347	3.4022220251570965	3.748315652468592	4.398348381184838	0.21323399406044224
Chrysosplenetin	0.0007569	0.05924	2.661	2.1009	1.2895	0.3668	yes	up	373.092	5.947	M-H	C19H18O8	86.2	0	4.744	0.6552	3.679	0.9217	4.6473234933363115	4.6900399655952425	4.5375372648546906	5.4878770006147	4.305427839975844	4.195817498057331	5.797549063454621	4.663713407667672	5.756504711535691	4.036833588998798	4.057849274776473	5.008940647038139	5.0388197907923535	3.9406979688427617	4.915121638906255	5.331678757576343	5.9509590024667895	4.681497416941247	3.766836971207252	3.954100947074303	4.798277923333852	4.007089957976806	5.516544636964391	2.8381386093731584	2.6007122353840213	4.098291777425389	2.7326039055276317	3.46866444190434	4.09833113045822	2.717952183899804	4.254389199446007
Morphine 3-Sulfate	0.02147	0.1874	2.6549	1.8917	1.5008	0.5857	yes	up	364.086	4.803	M-H	C17H19NO6S	0	42.5	3.878	1.206	2.5839999999999996	1.766	3.1234663234003914	0.131906731895784	3.4417657910019264	0.1085412824518586	1.839840354027373	2.8668889641086386	4.3943744050212725	4.6479350418996725	4.496715315949307	4.511095219255429	4.703752902010319	4.069802172967647	4.350465040843339	3.505036814473552	4.370329896072755	3.5062310694852883	5.073798687722221	4.817159422050971	4.92971672167406	4.074970272128434	3.771239589920437	2.922168772758216	4.01810548747504	2.469729849776189	0.08361896545069289	4.8260330357789565	3.1334867404897984	0.1040211083517468	5.250285137558556	2.5519652209752666	0.12049583583859153
Ala Leu Gly Ile Ser	0.00456	0.1246	2.6517	2.0007	0.7374	-0.4395	yes	down	458.262	4.0813	M-H	C20H37N5O7	51.1	0	3.2680000000000002	0.9642	4.4319999999999995	1.121	2.7659746858541534	4.977945189325316	2.628100052192315	2.4441614537789724	4.195434840832627	4.1349573118270895	3.7377928989777165	1.4646516431489167	2.4219843904629914	1.5024635151422887	3.6387663988088286	2.3651595845001685	3.3297587831432884	4.221355600255392	3.3776675583543114	3.0912823087939496	3.826770362073024	3.114260188352393	3.7055513205460255	2.6011640954441364	4.3777186092782125	3.46873826831194	4.599289821129903	4.7471491220073805	1.3499037517887371	4.0791868743495	4.957601668315604	5.120303018023672	3.7237649369506376	4.558672435203909	3.9878543631379713
Leu Tyr Glu	0.005528	0.1303	2.6412	1.7872	1.3679	0.452	yes	up	424.207	3.4996	M+H	C20H29N3O7	83.3	0	4.09	0.4866	2.99	1.49	4.191363532125569	3.5546931638265735	3.555005321479693	3.216249406595065	3.9571628088888415	3.897370462657486	5.013612502618951	3.941888399931728	4.278722223037262	4.183704463744304	4.140629189981087	3.0609185446174516	4.394808425995131	1.1654670527081832	3.427945714285461	1.3800326188713343	4.305898586397825	3.6215349814529882	4.385343725577228	4.839999940684558	4.00758472910087	4.356299425466754	4.483586858047143	1.1589116891636495	3.4935694506753547	3.3035740621793197	3.2576314093525838	1.0622686375690595	4.744517379589567	3.6242666897761526	2.863317607883035
Trans-Zeatin-O-Glucoside Riboside	0.002534	0.1039	2.636	1.9504	1.318	0.3983	yes	up	494.187	3.4676	M-H2O-H	C21H31N5O10	0	53	4.257	0.8272	3.23	0.8675	3.5552877410895656	2.941240496127548	4.843913615935703	2.213200904932441	3.56862177479242	4.002605265089429	3.641059127253897	5.951135986651906	5.085174678717179	4.29667888402592	4.728468845865135	4.000741755076803	3.4915662062368606	3.917277795698172	3.708247784210213	2.3577150563162768	4.368689539500133	4.701292944922003	3.922124594641864	4.148734039878282	3.2721030525235437	5.85394438846784	4.812944284996566	2.7006282663990104	3.9186139784267664	2.9670180719724883	4.2585803561482605	4.185804038823508	4.778348649409392	2.8118841577070106	2.26451967773055
Gly-Arg	0.0101	0.151	2.613	1.8228	1.3419	0.4243	yes	up	232.14	0.5651	M+H	C8H17N5O3	73.1	0	4.525	0.9127	3.372	1.4280000000000002	4.390033442203219	1.4364526809962443	3.8859077052370896	3.82964201676606	4.023706234562101	3.169989192783669	5.510908888226148	5.270589611926319	5.075084469593888	5.123662848711158	4.599651598657034	3.757411675602589	4.341357951944619	4.1439767593649135	4.266270913497725	1.5206040331760142	5.247351131906846	4.887016985403184	4.921985156520764	4.943354280838872	4.160330980031326	5.371422785943838	4.766019376452244	3.297284128665233	3.331117356772128	1.2770195559726665	1.6906788243279791	2.3009520111865718	5.3126422866547545	1.5138360726308948	3.7229845716098495
N-Acetyl-Leukotriene E4	0.0002924	0.035710000000000006	2.6054	2.1075	0.7501	-0.4149	yes	down	526.249	4.0813	M+FA-H	C25H39NO6S	0	60.4	2.755	0.4442	3.673	0.8012	2.5173040099345894	3.814528036907295	2.7495517030812766	2.589242157423428	2.6630595230487843	3.0593436181446645	2.5847204325250623	2.582487860038876	2.3217784998943065	2.6214864150018444	2.509019402525966	2.3992801943479045	2.49916404429677	2.952336328394007	2.611930214332267	2.5780493814207417	2.596083197659783	2.9307688337770945	2.5501075852590733	2.645852112956668	3.2911074622906638	2.5341860874509363	3.9303155794481097	3.5918698332902843	2.5687558966165884	3.1084511488973856	4.132960115793957	4.438546768367321	3.062884125321772	3.1196021393257576	2.6407335784606327
6-Methyl 2-Galloylgalactarate	0.01706	0.174	2.5778	1.7521	1.2587	0.3319	yes	up	397.036	1.3382	M+Na-2H	C14H16O12	0	70.5	5.795	1.432	4.604	0.9672	6.775144243321448	5.023059946702473	3.1469925207273284	3.9078382038342436	5.13448072752624	4.873594553150998	3.774906908090269	3.612026120355801	6.729796463121801	7.1476803992114775	6.942800476256162	6.835937131386403	6.292783561354697	5.339231610692172	5.826393269491416	4.441309176926803	4.7062822708660885	6.748159801680725	6.737581553767559	7.236803230195969	3.4261957809812205	7.241006201202864	6.7629124087670505	4.98369168326365	4.133396105954652	6.714551908443693	4.156496465314539	5.309557288117478	6.986801235122982	4.38429449364639	3.9954228720962095
Ginsenoside C-K	8.924e-05	0.0176	2.5654	1.8844	0.8483	-0.2373	yes	down	621.436	6.3089	M-H	C36H62O8	0	62.8	4.922	0.4878	5.8020000000000005	0.58	4.636287167744488	4.970287196524132	4.4957669420009285	5.933543713322113	5.2363913838270255	5.917272842608004	4.261891364847281	5.282805968858948	4.053335420250947	4.916985071574623	4.276246214386428	4.5879959085333475	5.412161112735364	6.0782745797191975	5.1939866894732045	6.062047732619622	5.647136854577216	5.043435424343466	5.045678352640898	5.451131453893758	5.43824401648787	4.230777599345807	5.34136321475029	5.5485946215592	5.0594397965552265	4.929638564255222	6.457230694067127	6.18588492697361	5.334758037071572	6.632045346844382	6.391569185595323
L-2-Amino-3-(Oxalylamino)Propanoic Acid	0.00402	0.1181	2.5641	1.8016	0.7076	-0.4989	yes	down	157.025	0.7022	M-H2O-H	C5H8N2O5	0	71.6	2.5340000000000003	0.7859	3.5810000000000004	1.081	2.3294526806071394	3.3935961570698763	1.7856269891972336	4.395385240397248	3.336520651505309	2.0370040097267914	2.9903036069818127	1.9358637906448235	1.6783580298430305	2.642613468498843	1.8631151483403947	3.896942844504353	3.8716561164512933	3.4294205294375755	3.7111891247594975	3.8026061340625295	1.949338652861176	3.038242151496432	1.903785962055715	1.9986971091612311	1.9775802570134389	1.8979044248900447	1.9462303023288183	3.929785079280916	4.502586076301491	1.7411653974105263	4.51084421989108	2.6508758295500217	1.8288401004915404	3.3268797201606133	4.640758983659271
Lpe(O-17:2)	0.03658	0.2227	2.5629	2.1782	0.7213	-0.4713	yes	down	448.283	6.4634	M-H	C22H44NO6P	67.1	0	3.929	2.334	5.447	0.6212	6.2280532264505215	0.7699779016692303	0.5694923951478046	4.8280718999328665	6.767768959616313	5.859040883784866	6.132635377900367	5.241482656728167	0.492454304440012	1.1614913682918095	4.113286998925151	5.411356295612619	1.0004568029115246	4.773669087825625	4.053811922224659	5.9468777918841615	4.704971605026965	3.9742065566309774	5.969900420463895	6.3521571032077855	5.31945824250351	0.6477581920563534	5.735779442811069	5.495743347178196	6.118476004379858	5.095993354730709	5.059605119549911	5.264248870119214	5.1321560523070895	6.147756245658227	6.050275914645674
Hesperetin	0.014219999999999998	0.1653	2.5578	1.7193	1.2822	0.3586	yes	up	301.072	5.963	M-H	C16H14O6	97.2	0	5.234	1.079	4.082	1.3719999999999999	5.0091097391061865	3.1991145040665816	5.236406068039539	4.644559182169767	3.176228891532282	3.1976475576423766	4.7619844943699405	3.9737832381889913	5.217755462854919	5.458432199398403	6.868095717074796	5.549749059686502	5.289567024151203	3.0254118293204546	5.774926693031023	3.091077009306752	5.398529620892056	7.187770097637247	4.993450676381602	5.107892850871728	5.749173379392222	4.552360093412263	6.950945426137532	3.226914373172733	3.5321648420210283	4.796708000495526	3.1212769370639157	3.0814812809743257	4.283493499185681	3.1066088734235007	3.1538683695399943
Mosin C	0.0002222	0.031160000000000004	2.5445	1.8471	0.8483	-0.2374	yes	down	639.446	6.2024	M+FA-H	C35H62O7	0	69.8	4.9030000000000005	0.6031	5.78	0.4931	4.9694392225123405	5.2066985314380565	4.968922046284948	6.010003989454418	5.271264413743869	5.835253421414524	4.277962805913268	5.2059152820813255	4.2332590431523744	5.095580332150477	3.419859400476504	4.385433668617505	5.469500707407371	5.962511053982285	4.789091323137089	5.87742448938736	5.676417209334249	5.0913140029670325	4.4678367156906384	5.5335778969518925	5.586554700600144	4.118707998008207	5.390234041992316	5.439302005375364	5.393834526465176	4.674760758874181	6.293541447147851	6.132840025211976	5.1108124194158435	6.47065937248847	6.315350029648439
Ansamitocin P-3	0.0064540000000000005	0.1338	2.5177	1.8495	0.6387	-0.6468	yes	down	633.256	5.2843	M-H	C32H43ClN2O9	0	84	2.008	0.9653	3.1439999999999997	1.175	2.4559542604001345	1.1297587177562496	1.149322931700616	3.0778110445236013	2.6225098654955485	1.128399887843016	2.625868496301294	1.719665486714444	1.3489352339994674	1.0703232116356716	2.032260606026856	0.871514466470418	0.9595525723436386	2.6680625016092594	1.0615668566750345	1.030655020448471	2.503156314631713	4.357976536761158	2.4257794187907122	3.047742816014082	2.9578222239502967	0.9909616979258138	2.8205250363103263	2.499851922121545	0.9277642287995644	3.234226700184692	5.244723213238888	3.5007145902196943	1.520804855557396	3.1438863958057834	3.919638530143993
(5Z)-(15S)-11-Alpha-Hydroxy-9,15-Dioxoprosta-13-Enoate	0.02178	0.1884	2.512	1.7928	0.6347	-0.6558	yes	down	404.214	1.0987	M+CH3OH+Na	C20H29O5-	0	55.5	2.311	1.3840000000000001	3.641	1.642	3.8907655534480217	4.4526735359669285	3.3957406985100307	4.609721831507339	3.754652876799944	1.1263614734475569	1.0678271709296607	3.3681064092311312	0.9491724894034294	3.3477479987586785	1.1100520728900616	3.498694997070429	0.9587603007568688	3.3928900787813197	1.0572394397750973	3.4608650468205373	4.2676107336766425	1.1242826919053202	1.1063194188891408	3.326075973913265	1.1331238665244747	1.013949259404808	1.0938153571322111	3.5658359775522186	4.52761208245708	3.7266439598748495	4.767523440809104	5.169768612301199	5.191066555462935	4.90795998272506	4.42399497433559
N-(4-Ethoxyphenyl)-1-[6-(4-Ethylphenoxy)Pyrimidin-4-Yl]Piperidine-4-Carboxamide	0.027960000000000002	0.2024	2.5089	1.733	1.4592	0.5451	yes	up	447.244	4.104	M+H	C26H30N4O3	36.7	0	3.823	0.9211	2.62	1.964	3.702334450980456	3.553683660003224	1.6076982880835045	0.04158957024922519	4.369211694426544	3.3495515030654515	4.528140523661776	3.7487646274616004	5.656213429535702	3.3502304957548903	3.608578758720348	2.4302912302897703	3.1745204945550602	3.2734948196353657	3.2905202803039466	2.9079469965406917	3.8739544573665183	4.918683100499208	5.121351302329937	3.829933050226817	3.550371221008477	4.2174803827745055	4.111405840987901	3.906051662671974	3.5412888434670653	3.0227419003102183	4.0067952636998525	0.039906473419826026	5.179094867722277	0.05444906077360622	0.05321976515502768
Lpi(18:0)	0.004533	0.1246	2.4967	1.7506	1.2157	0.2818	yes	up	599.32	7.4193	M-H	C27H53O12P	42.2	0	5.6579999999999995	0.485	4.654	1.297	5.523019600578452	5.096098274297689	5.864556265464808	4.7049278735337765	5.140146640809849	5.1781439180730455	5.625160282222992	5.151621026112112	4.172959039730137	5.991715659493338	6.097715097513043	5.5979189692923965	5.858992337532178	4.853866198389904	5.855708866410103	4.860826462384988	5.780620742913038	5.7323015092341825	6.018210107128779	6.182432339478281	6.156625092305803	5.888328347144414	5.767829536577778	4.685666569569207	5.591503399013589	5.472915569658563	3.7474698558518456	1.7572727423176862	5.590670359748883	4.527354633377707	3.105437418769317
Tyr-Ser-Tyr	0.01006	0.151	2.4781	1.7186	1.2786	0.3546	yes	up	430.158	0.9537	M-H	C21H25N3O7	67.1	0	4.681	1.115	3.661	0.7921	3.9510254009915204	4.3023802579420085	5.320053359647502	1.9735843757128293	2.046853359742648	3.2440076779554934	2.933624125951608	6.050855556664605	5.421020428163416	5.42186442680848	5.248509597227674	5.268305244298347	4.1797787706231455	4.706595590169909	3.2142004192049622	3.984054674073025	5.184958330524443	5.199848001308727	4.569198823937712	5.124584619443869	3.645902711395208	6.324863997707739	5.537608713236297	3.0336458962975135	4.318972115443225	4.345258761335142	4.094858707873348	4.492242006641715	5.503982224901469	3.1291575250435724	3.056837368508373
(8'R)-Neochrome	0.0029059999999999997	0.1088	2.4741	1.7894	0.8191	-0.2879	yes	down	579.426	6.373	M-H2O-H	C41H58O3	0	42.2	4.763	0.9757	5.815	0.6866	5.198170064580934	4.885869436843534	3.808783370664632	6.166114514158218	5.421562537769726	6.06344124599031	3.849474884288461	5.510569394436471	1.7217578844841452	4.948854280717077	4.590556663252404	4.450221585633204	3.97163023329938	5.799647757370715	5.8660147211659694	6.375988908641214	5.795803897764034	5.674069058539411	4.6439879985592905	5.2979828940963385	5.2779059776265855	4.3025233678349535	5.27927786262981	5.759346309341723	5.496134113247519	4.993249962072729	6.7246954249140725	6.2238154207824135	5.353017877765635	6.807528376993546	6.0706945190163335
Pro-Ile	0.004574	0.1246	2.458	1.85	1.1836	0.2432	yes	up	229.154	1.0825	M+H	C11H20N2O3	0	43.4	6.537000000000001	0.9624	5.523	0.7703	5.246428710419966	7.786411712030977	5.445125062247347	4.701266068643837	4.38326959213022	5.470100435906227	6.607955947931307	5.510826642882668	6.206246513880786	5.985322946631461	7.317232127163501	7.391219563787137	6.399022338382906	5.084668815042434	6.726402346623732	4.779123516155111	7.8113188620778224	6.710427122768482	7.131149541164602	7.843880229004297	6.591963435512282	7.2701055206233605	5.834400527573032	5.075331409738037	5.543536419431755	6.621820582749174	5.047650927379284	6.51249379760504	6.446594244965758	5.314062329523662	4.929537132572258
Ile Asp Phe	0.004292	0.1212	2.4365	1.7667	1.2986	0.377	yes	up	394.197	5.1043	M+H	C19H27N3O6	68.3	0	4.162	0.7326	3.205	0.985	3.253564620058792	4.538866688464383	4.364835586171997	2.9963387457484174	4.901233061194771	4.043550220023908	5.323789723868969	4.5218213400122655	3.923285103181497	3.90109522644729	4.608551516188942	2.0201273475534784	4.598764027088343	4.633091755240723	3.479418482907665	3.771474179864208	3.965746109237114	4.064809557611725	4.323976779313616	4.955401272885097	3.6530955233051055	4.200547707016857	4.4700814492586725	4.196289114033879	3.825780438207864	4.10407497712641	2.1403649980995985	1.9692316393709373	4.773638525461098	2.110276792526042	2.0998148052600607
Dg(Pgj2/A-15:0/0:0)	0.0016699999999999998	0.08903	2.434	1.7545	0.841	-0.2499	yes	down	613.445	6.522	M-H2O-H, M+Na-2H	C38H64O7	0	46.2	4.965	0.8340000000000001	5.904	0.5339	4.7111412103789965	5.605655685482845	4.161590180581968	6.261889189914867	5.329629294915642	5.868601570893035	5.392283299755043	5.687392036453876	3.097467950728709	4.833316971570758	5.486606905067268	5.097155148404899	3.7461281056651785	5.5996199091985535	5.3399169393984405	5.517508944545266	6.289626550905473	5.235817897876592	4.983091621959344	5.646324692793539	5.108041732298647	3.3105447644083976	5.268573481353639	5.495973416177313	5.546477639133476	5.3809727191010674	6.338187791202334	6.067399885020308	5.910070518951845	6.714189467195975	6.739661997608372
Quercetin	0.009354000000000001	0.1481	2.4284	1.6471	1.2399	0.3102	yes	up	301.035	5.9256	M-H	C15H10O7	77.8	0	5.091	0.9809	4.106	0.9236	4.034954157651547	3.7327639181063814	6.072275880385875	4.271196156252007	3.398497676826905	4.164326259490089	5.967393923502938	4.477556421009722	4.5929846154733625	4.3602803750242405	6.273097543954612	5.089579515454648	5.702830250854268	4.177592090494143	3.956403867467269	2.956491041245324	4.367497708175009	5.322402312267472	6.459714601987223	5.3589768913963605	6.7443966794501895	5.615127944812473	5.210055731998435	3.4421699342517456	4.020283989174986	2.7636210076614702	3.107017310214512	4.803256744778341	5.389310751554238	3.4545350210672723	4.039879955345379
Dg(5-Iso Pgf2Vi/A-13:0/0:0)	0.00044619999999999995	0.0445	2.4165	1.7244	0.8488	-0.2364	yes	down	595.42	6.3089	M-H	C34H60O8	0	62	4.751	0.5586	5.597	0.6118	4.912762427045659	4.7950373810295766	4.071235434073143	5.951829476215368	5.053428002386023	5.672203995854352	4.2476245070435725	5.280484799572141	3.5541866619926528	5.141991057566885	4.535834731221841	4.369468820611665	3.732228354437014	5.503906696598471	5.26663422927358	5.9892453972995074	5.650930223200482	5.276109616924363	4.627611661575563	5.091000994361618	5.126347374198059	4.5923270579922235	4.9452651386743085	5.4892684850365265	5.224082576404737	4.5177102814736445	6.437324723875434	5.940103114214808	4.881760591319133	6.538071867448172	5.834227904533918
Annomuricatin A	0.013319999999999999	0.1623	2.4096	1.8647	1.2456	0.3169	yes	up	541.281	6.1261	M+H-H2O	C27H38N6O7	0	76.3	5.624	0.525	4.515	1.7269999999999999	5.864909794023439	4.054997822348174	5.770556912997758	2.0072698422934456	5.985717963941768	3.172518271726404	5.698908873988394	5.866921783228867	5.508039316698903	5.908750681291107	5.877526441487303	5.84585312571769	5.959211429934058	5.8169720638866425	5.9662027266232895	2.4629181891717598	5.639255984982567	5.6621791898011695	5.5575106005753945	5.750568680532888	4.428853353289335	5.369707078906928	6.1452796604651985	4.071565292913148	5.700806695153887	4.625328681923152	0.9761027098033584	4.21466358932791	5.904222476489951	1.797118087541976	5.359480378300008
Rosamicin	0.04035	0.2311	2.4093	2.9938	0.7047	-0.5049	yes	down	640.367	5.247	M+Hac-H	C31H51NO9	0	83.4	2.637	1.374	3.742	1.433	1.3985738295596484	4.192248616589395	1.3154246440701691	1.4680510498323518	5.379418510033461	3.8340552395145333	1.4636726758203191	1.461511416570979	4.029241696213458	3.4225874513694703	3.146637692891668	3.6536814372968696	3.1988408140967937	2.9147015725194407	1.4900412654996116	1.457215770958674	4.291360106113852	1.4036458456437828	4.339927907937705	1.522983597067178	1.5023028687821105	1.4148425672746432	1.4716398890812428	4.808789995543768	4.84639490202958	4.877491467536085	1.486419334290058	3.6575827259483473	4.121172373284315	1.4722268388179054	4.733817587212791
Myotoxin A	0.014819999999999998	0.1671	2.4071	1.6433	1.2657	0.3399	yes	up	585.269	6.1739	M+CH3OH+Na	C29H38O9	0	66.7	4.959	0.9446	3.918	1.2930000000000001	4.4735128262397	2.879014416107254	3.9613159936562994	2.8355889802426075	4.700978239845458	2.996739084886697	5.309905606297704	4.618452867250978	6.089702940747897	4.128628757711653	5.4275941246013035	5.872039270141207	5.754607747573411	5.518537314758524	5.258516793697607	2.9659586027938656	5.453150245230216	5.808980850090316	5.955614434229287	5.619080935981437	5.159667602422246	4.792181046096976	2.9614907984159364	2.92146481625352	2.881763080453357	4.5004438896893815	2.9892693349976684	2.8168212387462472	5.919516076549972	2.9589861004698554	5.073244863963501
Desmethyltetrahydropiperine Sulfate	0.030510000000000002	0.2081	2.4069	1.6636	1.4249	0.5109	yes	up	356.117	5.888	M-H	C16H23NO6S	0	69.3	3.927	1.13	2.7560000000000002	1.745	3.7613640366623504	2.846134056712317	4.768389244901903	2.0680714403279703	2.460962769557136	2.854028348826094	5.3654441951639535	4.174760195076445	2.851029289918322	2.9482693918042107	3.1893979296700317	4.937132416303816	3.4552418469714836	4.303767115021114	2.9837142541994286	0.4814119962632008	5.667859935947735	6.5295529788703695	3.4401984585127523	3.763756385806633	4.820543811350444	2.858202158903824	3.7876196673263234	2.8053029493501445	4.699141233378652	6.318690667842207	0.5018907880399054	4.173781805475777	4.8502346840054615	0.4918870247477546	0.5244986672934577
Feruperine	0.02553	0.196	2.375	1.7264	1.3187	0.3991	yes	up	288.159	6.0196	M+H	C17H21NO3	0	54.3	4.539	1.301	3.4419999999999997	1.197	3.640147940549361	2.414344101523689	4.901026453332086	2.3710343719169784	4.067204011752383	3.9626300756978488	5.874847511990813	2.5169228944898623	5.6179474721224025	3.8314312591608153	5.700344102162499	5.836369969095391	5.192090228750333	3.574326156453949	2.789203207107234	2.9566812604972488	4.135902922790668	6.506131617479151	5.688969887243551	4.816375519782602	5.252838747720699	2.4093207387689293	5.040672734251444	3.209529373017056	3.1470736253991443	6.181167813735902	2.5243522253639172	2.35232031993204	5.644717881187288	2.49413067444626	2.953405739809773
Arg-Leu-Pro	0.01535	0.1698	2.3680000000000003	1.6238	1.2764	0.3521	yes	up	385.255	3.4517	M+H	C17H32N6O4	46.9	0	4.465	0.7926	3.498	1.304	4.45645159928809	3.3672699812691764	4.659094344805199	4.3235408526063015	4.065934956206991	4.29690635168605	5.388976613226359	5.364960317088442	4.250743405415586	4.669580450756362	4.8325815164128025	2.2704131416970816	4.794605818987935	4.9304162468585035	3.552843404611404	4.2322485423484615	4.594867119015541	3.802761394681784	4.68514727916034	5.551040000213167	4.787799078817928	4.593063047497201	5.142468258720721	2.3235126535434083	3.793838810153061	2.1154688743836108	4.243159066533988	2.2192893820608126	4.836770395186541	2.3609061741014084	2.3504078855408044
Asn-Lys-His	0.01248	0.1591	2.3656	1.9625	0.7422	-0.43	yes	down	380.204	4.5696	M+H-H2O	C16H27N7O5	36.7	0	3.133	1.2990000000000002	4.221	0.6888	0.08092949652542086	3.3299059204493004	4.540564330924147	3.4975781298974216	3.012227740068718	5.8309466052672505	4.352331813189466	2.9529870449106834	0.9060119780477748	2.18696667007196	3.7665340309535615	3.4077700231482586	1.4430010971537357	4.42610090560859	2.0880553370841803	3.688625328325482	3.3621139820732373	4.256837401649514	5.222516094992878	4.079585134251669	3.1677433969709883	3.5998262182484715	3.7709181102235667	3.4136814257589636	3.090510186586781	0.06381968537304923	4.511470074920577	3.318021115896629	4.300488339117584	4.717749150509596	4.888504029755758
2-Phenylacetamide	0.0014140000000000001	0.08304	2.3622	1.6276	0.7677	-0.3813	yes	down	118.065	5.5849	M+H-H2O	C8H9NO	45	0	2.7039999999999997	0.6676	3.522	0.5597	2.232579609963482	3.9441949249630337	2.158043845195168	4.162816615529331	4.127073569895076	3.374902564670161	2.144747896200893	2.499144059028292	2.014238535993767	2.211887216581785	2.3172638220509167	3.4016419259765667	2.8385981369388564	3.7188779306414648	3.0309254215543047	4.11357249846976	2.9617273376964914	2.2057171865520564	2.1863857863844616	2.247037402682252	3.4648800960958783	2.0859256049030432	3.297409670940341	4.11578475234798	3.3664482718795763	2.9474671252724063	3.791015145075285	3.5764496675754494	2.216176752833955	4.096154344579015	3.364588022483763
4-Deacetylneosolaniol	0.002577	0.1039	2.3589	1.8264	0.7743	-0.3691	yes	down	341.157	3.3183	M+H	C17H24O7	0	42.8	3.029	0.799	3.912	0.5878	3.5130786798085363	3.4939514549633186	4.100208280034432	3.922680925789882	3.5124171250765284	3.7054286950005024	2.03055709623346	3.1758667772790403	2.043317535727617	2.0975613727110254	2.260934127975012	2.2746476286070414	1.91103119949249	4.255072155534685	4.187882345732277	3.1954696087694834	3.0984344955990286	3.2246714148985536	3.3622538365631374	2.1326487434311203	4.148475571934377	3.032103568452694	3.945310305416655	3.634762697029623	3.9618088113754935	4.3224570034535095	3.596347558125456	4.631194379940856	3.2201533251201178	5.0841204209044575	4.276868850565773
4-Aminobenzoic Acid	0.002493	0.1031	2.3501	1.6586	0.782	-0.3548	yes	down	136.04	1.3759	M-H	C7H7NO2	75.4	0	3.0239999999999996	0.8385	3.867	0.3245	2.949412591609016	4.315018103397809	3.387859740800703	4.113846845385279	2.7751911661851842	4.115810878072678	4.004778534053812	4.083789887647187	1.71465016387328	2.244597318770834	1.7891602504640478	2.662736906502773	3.3703611123630064	3.9944974465069514	3.634544214650087	3.9197189078248216	3.901147877490944	2.4861083142550724	2.8697921381292386	2.19000970860574	4.292260058019944	2.225709486519787	2.5644391812061555	4.25766311584605	3.804789259193884	2.2098370875198983	3.8056404181251295	4.218104055377308	3.3320051917448734	4.113707188862252	4.0740814461123565
Naringenin Chalcone	0.009241	0.1473	2.343	1.6526	1.2188	0.2855	yes	up	271.061	5.963	M-H	C15H12O5	74.7	0	5.308	0.8381	4.355	1.055	5.086762737175073	4.117197545396115	5.994211750687415	5.175113524395533	3.4132536224901133	3.195468770154497	5.78882751952276	3.8248233033084906	4.8104746359336366	5.05349621986232	6.536466399602188	5.2201968996107055	5.975279801130156	3.0232337167204206	5.405078037918841	3.0888986074391074	5.189305756392642	5.976746849556731	6.1871494906888165	4.821381033248822	5.970148663838525	5.4906049831585415	5.984566668092118	3.73664645494955	4.576802044538343	4.402528228915632	3.1335125261114705	5.353286847310028	4.785148303707305	3.1044304092972435	3.576782608492192
Leu-Asn-Pro	0.011770000000000001	0.1572	2.3409999999999997	1.6718	1.2911	0.3686	yes	up	341.183	3.3713	M-H	C15H26N4O5	66.2	0	4.072	0.77	3.154	1.136	3.953009798743248	3.5829420455867202	4.351157615424522	3.2449940920231244	4.042153472326961	3.9530086778027904	4.998444106368716	4.5913544557301815	3.953919777057628	4.163363867277853	4.286569105310993	1.547046129084109	4.455187915376298	4.308673237631463	3.0448024824553475	3.647437487062373	4.156145817057385	3.678896989886389	4.090764837385783	4.967862352020163	4.482487334881587	4.348143061353048	4.670054584803807	1.8559257890819003	3.1546320442092486	1.5336600335343396	3.841933748959708	2.797105206775308	4.187228565317703	1.7374667724642516	1.783940366423482
19-Methoxypomolic Acid 3-Arabinoside	0.005967	0.1306	2.3342	1.6465	0.8058	-0.3116	yes	down	617.404	6.2717	M-H	C36H58O8	0	63.7	3.7710000000000004	0.762	4.68	0.9314	3.005212053802354	4.727313113766393	4.140780304818322	5.265835056735289	4.950612978270028	5.3840442071976735	3.072756901594652	4.143974775756745	2.8091782638021376	3.839445214600266	2.996910241561543	2.8869091910004783	2.987033983505319	4.649379571759131	3.9537872929302025	5.252381468194562	4.75635122861092	3.878661972159828	3.0380806138319274	4.088762934731795	4.591425061494639	3.0221281890866964	4.762566676535858	4.729957452390831	2.951198709492494	3.258166729388213	5.493349931206279	5.063057960747538	2.9621757968353126	5.941581710569601	5.547954887836337
Leucyl-Arginine	0.007232	0.1375	2.3281	1.5821	1.2576	0.3306	yes	up	288.202	3.163	M+H	C12H25N5O3	0	42	4.404	0.5712	3.502	1.165	3.5262192492492743	3.725939110973516	3.5021993740059036	1.9112776022169908	4.5446443584471385	4.370340294283573	5.486884889360522	4.154662413975556	4.1250166976591895	4.812765609442951	4.426067626712382	3.769585985064267	3.836691201459971	4.278851469454204	4.238139041565264	2.055722977977243	4.7270367236535895	4.674529631768278	4.960829852239481	4.945333238907235	4.214744669996537	5.147140620753522	4.859882489672303	2.096739922444009	3.8470990931946547	3.6189715156002658	3.029222836024397	3.622333686925872	5.1136350969294675	2.8058951333510325	4.289268816347495
Thr Gln	0.03003	0.2072	2.3276	1.587	1.2597	0.3331	yes	up	248.124	0.6129	M+H	C9H17N3O5	81.8	0	4.967	0.4967	3.943	1.8719999999999999	4.554354637964054	3.705918266902858	4.398843889483093	3.7565578502609305	4.7048548358790185	4.517276614206203	5.590728001322371	4.6703340518635414	5.214763721797004	5.1497675670434	4.879290626166645	5.306776198116743	5.277747474843168	4.748199196225058	4.238676736506614	4.868661085109288	5.182647520661028	4.957531691586318	5.143162140564023	5.691156683027224	5.002967448223355	5.1751201231522295	5.532426635015031	4.552900985947962	5.0255614795468535	4.205176609528378	3.9161882546283815	0.09218319907961003	5.3000883599036746	4.5065744085895245	3.970254914966951
L-Gamma-Glutamyl-Beta-Phenyl-Beta-L-Alanine	0.01048	0.1516	2.3257	2.0055	0.7544	-0.4065	yes	down	358.139	4.7192	M+ACN+Na	C14H18N2O5	0	41	3.054	1.196	4.048	0.4683	3.780901783040073	3.632759536462774	1.218954233541849	4.11467657368585	2.977166529850748	4.477868825480919	1.2063844093252545	4.118082530595264	3.160519950163588	4.203544126622109	4.102747603553284	4.260328061303962	3.3693474206258966	4.201701644103176	1.5552843800930791	4.323400158888946	4.61153997778083	3.304030075333469	3.395029842354967	3.0846546035379916	1.0755493338388116	1.1510383251871412	3.815562226464896	3.826847239175645	4.102393642519558	2.8251130610396515	4.129047796241626	3.9703588822926106	3.723105237688768	4.428368049497236	4.286473578139186
4,6,7-Trihydroxy-1,2,3,4-Tetrahydroisoquinoline	0.005632	0.1306	2.3256	1.6640000000000001	0.7804	-0.3577	yes	down	226.072	1.2689	M+FA-H	C9H11NO3	0	57.1	3.12	0.8237	3.998	0.7484	2.3614980449707863	4.397088228321821	3.802725992272627	4.152090834465647	4.695585575097587	4.110139372073582	3.779188195851232	4.195443794458764	2.166297257498973	2.465558592629923	2.353224439325811	2.2436525801469362	2.7293770013047416	3.748997781671265	2.912799100816437	4.788026792111611	4.071483813456096	3.12895797434248	2.394260058873225	2.4898997631758704	3.5648778145365387	2.3783583418753103	3.1566361753736407	4.582729214596852	3.9919480225373576	2.2299491805574263	4.540620011143608	4.173224863860987	2.3186140138997082	4.606235994683983	4.540219376858585
Dihydrodeoxy-8-Epiaustdiol	0.005675	0.1306	2.3243	1.6623	0.826	-0.2759	yes	down	281.101	3.9426	M+Hac-H	C12H14O4	0	41.2	4.2	0.9003	5.085	0.6145	3.5977972487878302	6.051039776077981	2.9779501562108446	6.019896254974957	6.372741063946919	4.566687060915807	3.900450939973057	4.293379288786183	3.2485559336858656	4.136216506655258	3.648245827100877	4.4125219509336135	3.906736232143923	5.1068311865208695	4.89471858195867	5.969311629532182	4.349465265430624	5.03202243940697	3.850171572446763	3.984939023423312	4.325467243017485	2.9066047748030965	3.9046656211451873	5.8940155016774165	5.01714154401905	5.4965738259309385	5.605314147978302	4.72794368033258	4.0642573870707706	5.905175713258528	5.0359672806266165
2,4-Thiazolidinedicarboxylic Acid, 2-Methyl-	0.001626	0.08765	2.3199	1.649	0.8	-0.3218	yes	down	192.032	3.174	M+H	C6H9NO4S	0	46.9	3.2769999999999997	0.6398	4.096	0.6383	2.9740671509343968	4.241521847832853	3.657284736999204	4.357735646607901	4.503254255151737	4.016722537592774	3.130713988086054	3.7458455171088767	2.2820463142812804	3.1992682730131428	2.5038558580210784	3.7585324713519856	2.8862296496380493	4.173725694734178	3.664526779863991	3.7818769588861567	3.6232426111217584	3.3205864294940817	2.454832306894139	2.6538813391377407	3.7253322148246593	2.3540304955776783	3.576132931089393	4.3485074788082825	4.068435627546618	3.4894029020646826	4.610833423253763	4.441275270048223	3.212882870498964	4.7754019835904025	4.224843621253952
2-Hydroxypropyl Methacrylamide	0.0007886	0.060239999999999995	2.3035	1.6182	0.7786	-0.3611	yes	down	202.108	3.1782	M+Hac-H	C7H13NO2	0	60.2	2.697	0.601	3.464	0.4719	2.47026194639968	3.5310561138754286	3.0793526181469035	3.645363383601621	3.1583502249628888	3.8023587813995343	2.621863812697279	3.5365322656011986	1.787792516100054	2.0444409617368664	1.882048899895051	2.0647002195903235	3.1549741959773163	3.605482895780962	2.6271632764278547	3.733929673396641	3.103722408700683	1.8963267367056809	2.826396749033683	3.2238944842002164	3.1491099052101843	1.9069696716650697	3.1707396784797446	3.7791063504289375	3.0877000857539345	1.760015680701049	4.122098396758021	3.6115025528047435	2.923698956706448	4.1779702582561535	3.9243214331779748
Asn-Ser-Lys	1.1599999999999999e-05	0.004339	2.2958	2.0138	0.8375	-0.2558	yes	down	402.198	1.8026	M+CH3OH+Na	C13H25N5O6	37.7	0	3.2939999999999996	0.1692	3.9330000000000003	0.4867	3.505248594537848	3.403641167109794	3.2024486962797885	3.82833837169706	3.5894797822704554	3.580926413515397	3.1890667827182853	3.2377346335957884	3.0575567231133376	3.2566143375681804	3.235011120679614	3.319491122167062	3.0683345707219423	3.184379439335567	3.1774829207175266	3.2218604887577795	3.6441988724632592	3.4676136536458717	3.31925852395933	3.2919542391575733	3.0480974828374774	3.3493143053788965	3.217390519442498	3.5838234085892875	4.056786924399603	3.9258628783811087	3.8957742684520333	4.669329758468463	4.499450282340677	4.511373995925818	3.689016053996454
Lys Val Tyr	0.00893	0.1467	2.2924	1.6398	1.2367	0.3065	yes	up	409.244	3.4304	M+H	C20H32N4O5	35.4	0	4.8069999999999995	0.7097	3.887	1.123	5.388327561468119	2.820716101185353	4.1802541734447285	2.3865530900368284	3.838750446198455	2.547346284927764	4.786715272037387	5.083099002788176	3.920854729434016	5.049349182950817	5.344258985910408	5.3590723967275125	5.212029407194415	3.4552659710280382	4.276164189524009	2.5166241701792003	5.338589454511482	5.342967476989756	5.535061736814273	4.6852930007667055	5.240961981185758	4.693546521199888	5.228015887790127	3.1956613901026207	4.9292700235967235	4.1188155905158075	2.5398903224255163	4.84673292335079	4.0014	2.5096654728853407	2.499153700411856
Ecgonine Ethyl Ester	0.04675	0.2451	2.2885	1.6763	0.6171	-0.6964	yes	down	214.143	5.0936	M+H	C11H19NO3	0	51.3	1.921	1.4369999999999998	3.113	1.734	0.07808109008823415	4.396613078645308	2.6866314974256844	5.498089927721735	3.056113811346212	4.807712323059578	2.8081499202849716	3.810770296513197	0.07445706866575241	0.9459469399689304	0.6351947484188599	0.1537415677985189	0.6946895166752038	4.3219703320714045	1.0285117600583318	4.349114687881372	2.7901836046164976	0.7177164000726306	2.480207337226916	0.772162035217388	4.2157651908866205	2.617425615121844	2.532765416950438	4.371786924272331	2.7953296210869607	2.545429027791517	3.564169631065852	5.04161443790264	0.7255104998534214	4.8820678213090725	0.1011589247580939
Val-Gln	0.007548999999999999	0.1401	2.2809	1.5499	1.182	0.2412	yes	up	268.127	1.43	M+Na	C10H19N3O4	65.5	0	5.372000000000001	0.7104	4.545	0.8838	5.484336479748687	3.623452661418357	4.3516346443973735	3.617688175758632	4.514158949697948	4.870544592219032	4.89766039800017	4.847684028961367	6.027346495241178	6.1321816003441	5.831602495962057	5.927247032039889	5.767283575714966	5.287541100910152	5.012036889112745	4.092692071113063	5.1490155619834805	5.872345245482175	5.771176561474882	6.232532623718349	4.890591467048955	5.801129237097545	5.928275717039634	3.9565275647132383	5.237316881751137	4.823587753042263	4.173645629963337	3.61174094949464	5.857202651650297	4.372600777431847	3.6551324879790186
Oxindole	0.009701000000000001	0.1506	2.2742	1.5969	0.7882	-0.3434	yes	down	134.06	4.9707	M+H	C8H7NO	83.3	0	3.468	0.8107	4.4	1.0590000000000002	3.600635391319309	4.249283698957928	5.3760351015383705	5.19951200915762	4.124880309602764	4.338511672885078	4.7820143693693575	3.597323626809118	2.584383476241124	2.7831648413178494	2.7615858620285274	2.650732991628664	4.285106395407151	5.750285325709924	3.930379519085688	4.647942092462951	2.7741748638006243	3.3402852008264734	2.7575446921869893	3.51851367890668	2.843465094365784	2.656542302496564	3.2810314368757414	4.289765931030911	3.617906982282544	3.3010413847644613	5.784084522262801	4.1041010125268915	2.787473667945424	5.9568448355927375	2.730957604509673
Pa(14:0/0:0)	0.002015	0.0957	2.2734	1.6404	0.8013	-0.3195	yes	down	381.203	5.6527	M-H	C17H35O7P	47.6	0	3.469	0.5136	4.329	0.9016	2.9380814960618027	3.3452343135747893	4.075291069871295	4.618657181616426	3.5570638756855333	4.89764649879334	3.1895533402147063	3.8345675092522633	2.3074237112520475	3.601212159876885	3.73707894794529	3.1086529095514686	3.9038398651800463	3.85923	3.9597896217531168	4.306518469508028	3.8086064507999606	3.584269474098348	2.4498785123084392	3.664821520014616	4.1465322281334425	3.6479510312659262	3.0584593222469936	5.0288407982837935	2.9910085163316227	3.0367129983939067	5.203987926231783	4.898340598069799	3.77477352245004	4.6913674146947955	4.788370967552918
Phosphatidylcholine Lyso 18:0	0.02104	0.18600000000000003	2.2697	1.5248	1.1925	0.2539	yes	up	524.37	6.5985	M+H	C26H54NO7P	96	0	5.88	0.8271	4.931	1.3459999999999999	5.4962059110531785	3.3946555621652763	6.4283786494620125	3.351188133244037	5.239435434204811	5.477397765314755	6.185680800768408	6.088154354521534	4.950813759517947	6.33531010932205	6.712501644597384	6.2364473362644945	6.06877114949357	4.7753462088538825	5.444459119213126	5.524254024684487	6.438065091647713	6.8577363574387205	6.6145591297691775	6.3961439727592575	6.088865582544577	4.9289020378217225	5.807900534060209	3.4371431440380444	6.5075782829151025	6.142303709259926	3.5469559624823215	3.3324009011332705	6.520149189735659	4.370950137542888	5.331447212232433
7-Ethyl-10-[4-(1-Piperidino)-1-Piperidino]Carbonyloxycamptothecin	0.00233	0.09982	2.2593	1.5692	1.1668	0.2226	yes	up	585.272	5.963	M-H	C33H38N4O6	0	41.7	5.456	0.5009	4.676	0.8063	5.462149891337212	4.68828100581759	4.939626180205525	3.4620433561322286	5.087482672915471	4.446012967999737	5.24976602526871	4.899645091257496	6.0662402821603765	5.6616565992860775	6.194333716190015	5.959071220667587	6.018189668725246	5.21524	5.323954260723316	3.6066980067748236	5.0391371793363335	6.064492926465085	6.1351595170891535	5.571979825149247	5.0358960648583615	4.799445254969059	5.475929533930762	4.601172864368997	4.855389270178835	5.367000046575393	3.5674126520168445	4.520016514314617	5.728567203427732	4.314621691026917	4.327554698269728
(+)-Gamma-Hydroxy-L-Homoarginine	0.001348	0.08232	2.2592	1.6187	0.8039	-0.315	yes	down	204.123	3.1576	M+	C7H16N4O3	0	40.2	3.193	0.6258	3.972	0.5417	3.4166220333594706	3.8337526272534097	3.778360650754226	4.200456924087159	3.7698516199644483	4.373213414364575	2.5198486962631668	4.1813838154259075	2.343558406146985	2.5420310598808085	2.5204791829877293	2.6924775080505574	3.508294175954577	4.3365228490046475	3.13734434568574	4.444394863001165	3.8994754411419503	2.6763295717971967	2.5276105351453	3.846916019685449	3.707800788643973	2.4155885845196816	3.3551413437880786	4.301815700384156	3.6591748456323847	2.2545687968970567	4.670479836779706	4.055092601338775	3.3790839124557537	4.897757980506505	4.347841196133059
Harpagoside	0.006687	0.1354	2.2549	1.6378	1.244	0.315	yes	up	529.144	5.5994	M+Cl	C24H30O11	0	57.9	4.649	0.5716	3.737	1.1640000000000001	4.7649485606925195	3.849630762328687	4.204932095952191	3.6435361545079363	3.6968072658366533	4.546699103403299	4.700352521119042	4.426530428161309	4.9779320912297305	4.433373595268387	4.249348751362342	5.699130345106343	5.608104388071302	3.0856128356217645	4.564818337132853	1.6748592289877862	4.255917373185759	5.05857135562431	5.140946764042021	4.851054527667436	5.219881529227722	3.778735522227632	4.84953271867029	3.704774493461748	3.856693591532813	4.305525699128287	1.7044651384445844	4.54234697193181	4.632314986927504	3.416459121567005	2.8759206251250315
Val-Phe-Ser	0.0343	0.218	2.2441	1.5973	1.4274	0.5134	yes	up	350.172	3.5961	M-H	C17H25N3O5	43.6	0	3.266	1.126	2.2880000000000003	1.2990000000000002	2.7956169598277403	2.9064452958226537	0.9135017628329564	1.0560496888429258	3.643842191888221	2.647768707276235	4.663261508995179	3.574409150799033	3.3545909450967235	3.949861024687024	3.7584974482061138	0.8860065451222843	3.4143932475354064	3.758253798837836	1.0768427568815917	2.43254060595326	3.719555838421824	3.2754157795641907	3.7246746621396656	4.505402807466716	3.715773345720033	3.9349522413061657	4.247547185078297	1.1711258965101599	0.9425251308535602	0.8740402115929399	3.0876876514597287	1.0370950127793923	3.5545526833882177	1.0599937187814263	1.103367754449674
Turofexorate Isopropyl	0.03084	0.2091	2.2403	1.5595	1.2686	0.3432	yes	up	439.18	3.6385	M+H	C25H24F2N2O3	0	44.9	4.563	1.266	3.597	0.9427	2.536218706593379	3.6846703592416783	5.4548510645837	4.1676218561009595	2.637608090988324	4.370521308510802	2.6450424979718097	6.837765344251701	5.14808577868114	5.170068541185177	5.260168081046328	5.02147899249347	3.2376414984691766	5.3554291021528115	3.967635809644447	4.588740089002623	4.991393110538639	5.189989808023388	4.4315213423923066	5.267369298578315	3.313814044697504	6.493624933821077	5.416498141938857	2.6333390605315325	4.094650156375699	2.4246454628625984	2.701072672943172	4.9981851539538935	5.585282567066059	3.8926233807362753	3.704227248648517
1-Dehydro-[6]-Gingerdione	0.014209999999999999	0.1653	2.2381	1.5122	1.2961	0.3742	yes	up	354.17	5.6437	M+ACN+Na	C17H22O4	0	54.6	3.734	0.8545	2.8810000000000002	0.9361	4.083957735037236	1.9513680109512408	4.254363145965584	2.393520266970354	2.7041625787618417	4.209006576343536	4.452373246706003	3.4429632318023566	2.6650218034229782	4.081978685357362	3.4901137320351694	3.583214702348689	3.4746439393750035	3.4103978635275767	1.9935562849361657	2.42337010744392	4.2175574500406565	4.546629009076214	4.56023813650508	4.163531356941843	4.831725066230568	4.099226434024837	4.341025477678453	1.9934187969175128	1.954089612463696	1.7868219755418604	2.060660145317975	3.7745092960787368	4.462187187856053	2.9070311374435565	2.02017237578064
1-(4-Hydroxy-3-Methoxyphenyl)-5-(4-Hydroxyphenyl)-1,4-Pentadien-3-One	0.02336	0.1916	2.2342	1.8052	1.2835	0.36	yes	up	341.103	5.963	M+FA-H	C18H16O4	0	52.5	4.478	0.9237	3.489	1.383	4.739787208767766	1.7471171980062647	4.480840739240487	1.6521630285500153	2.7417508177532124	1.7456756423970032	4.83189382521546	4.240558245091116	5.866112886772572	4.6841626185093395	4.431377688340335	4.986310822168402	4.9912611283122565	3.730321040499053	3.8585069442511504	3.9513219736572895	4.66973627340998	4.245209147394351	4.949848895087817	5.165583915302404	5.311047343467074	4.203582431019247	4.928937175332793	1.774451490526779	4.633574286589856	2.8942934637967697	1.6707502326645831	4.360190733190001	5.033226723990102	3.731054426941594	1.702694311429478
(+)-12A-Hydroxypachyrrhizone	0.01469	0.1664	2.2133	1.5879	1.3107	0.3903	yes	up	441.082	5.8023	M+Hac-H	C20H14O8	0	60.7	4.008	0.7333	3.0580000000000003	1.3130000000000002	3.4284657785449646	3.6015013051523326	3.9725765064754333	4.1390686061127475	3.308850630773754	3.1793869235117884	4.380844963113382	3.142698479607135	4.01481510520533	4.99077499729675	6.354664623924628	3.7700936683519095	3.3096103210547247	5.1945981142090485	3.4866246097587226	4.062236740272484	4.140309111192074	4.559502350068326	3.6261033865685266	3.8789025905796017	4.0003060068380565	4.019141500711966	4.170628068284956	3.2363069980688133	3.439959253467621	3.725778316707565	0.933618440030692	3.90700437254198	4.056160604593649	0.9206752073210654	3.623068636246813
Val-Asn-Pro	0.002202	0.09972	2.2084	1.5043	1.1975	0.26	yes	up	329.182	2.3807	M+H	C14H24N4O5	52.4	0	4.408	0.3305	3.681	0.8541	3.9018287727698255	4.450989113860915	4.245051080438373	3.698060774922135	4.082722656105065	3.9590709351968782	4.768274247200599	4.432692260007771	4.53714810176564	4.66814922229979	4.445230340247882	4.779951022313224	4.652163995248432	4.51787355720825	3.534137164799977	3.5558688716984017	4.490170187747991	4.806731492483217	4.171550117020107	4.787951552578352	4.381425557291833	4.232731502660856	4.388906808985102	2.869693034771453	4.364831692768143	3.4617584839866016	3.88800133064932	3.0112819606020427	4.506636943158568	2.9072088593663667	2.8966772935699154
1-(3-Carboxypropyl)-3,7-Dimethylxanthine	0.02675	0.1989	2.2044	2.3012	1.5821	0.6619	yes	up	267.108	4.3072	M+H	C11H14N4O4	98	0	2.938	1.192	1.857	1.355	2.718319951114598	2.8274011561785195	2.931050360525223	3.75528979592434	2.368124449614395	0.0010488831364385636	2.894621561717304	2.6468654130298543	5.424016435828161	2.860914550495733	2.80584288688429	2.1127871409311454	2.1845791468929168	3.4256516231162184	3.0790020672889615	3.046771804990018	6.676717390817213	2.7581955211080467	1.1930166667331998	2.8057541796321948	2.442401709103076	2.5308467524679097	2.56603512366418	2.7289071048364018	2.6001177831611724	2.8308162797400938	3.0346279423077362	0.0006930464726163138	0.0010690405242035042	1.787763515434532	0.0009385226458337404
Proscillaridin	0.0007237	0.05814	2.2043	2.0878	1.1512	0.2031	yes	up	551.26	7.0616	M+Na-2H	C30H42O8	0	52.8	5.193	0.4674	4.511	0.523	5.114531778496851	5.259770338924474	5.335194556594699	3.7733639736102655	5.799759306872853	5.508273838826134	5.283255156607251	5.167648327498613	4.605537235777106	5.667354199980768	5.7672959133543635	5.2523169286943805	5.656011645579133	4.1968879458085135	4.316792243788092	4.803278198649633	4.94713076763857	5.544832226091393	5.475865510624441	5.1634671360754485	5.235618699118621	4.029834139829154	5.05288913793974	4.340143243329813	4.788318082373413	5.027680938941427	4.629363416433963	5.047456258969799	4.720499621542691	4.074232269592778	5.184977857112812
Gly Thr Lys	0.015969999999999998	0.1713	2.2038	1.588	0.8247	-0.278	yes	down	305.185	6.0142	M+H	C12H24N4O5	39.5	0	4.526	0.8865	5.4879999999999995	1.206	4.342388743229479	4.919042133934559	3.715611497423706	6.728637303994101	4.666407422925894	5.873042703188273	5.857975404280992	5.478852713148696	4.189108853821407	3.5963231191007097	3.7516411698797016	5.3234818560872155	4.227847673589941	6.6304229115385445	4.94823790905958	6.0861460297365575	5.246628466467049	4.556922217498839	3.794080768237679	3.480918136101143	6.5226730311538486	4.2180011820728165	3.15218747964565	6.421392091110167	3.7646562939995247	3.709191055451432	6.912598155031049	6.124330585737336	3.8628275015800018	6.57796910184311	6.060795706629232
Glu-Tyr-Gln	0.0346	0.2187	2.2006	1.4632	1.2684	0.34299999999999997	yes	up	437.165	3.6601	M-H	C19H26N4O8	72.8	0	4.542	1.278	3.5810000000000004	0.9853	3.1075979471775232	4.037527001882256	1.8152432091694377	3.553835566684341	3.2315320668453973	2.874051818999741	3.4981372679937883	6.716731718038938	5.327903742548167	5.2826684448884285	5.405198886097843	5.089450993778212	3.93823677710168	5.2999138316723835	4.426018988642325	2.8400647150495253	5.135170948548852	5.2912034241112424	3.3280450014010863	5.454489072966193	3.2438925741688927	6.4552665597115935	5.517583367763631	3.819090933587448	4.422885943619776	3.0132033118267496	2.885162275553038	4.8470214964161835	5.393921424640538	3.6762581097009375	2.023416302545129
Padmatin	0.033889999999999997	0.2169	2.1998	1.5299	1.317	0.3973	yes	up	317.067	5.781	M-H	C16H14O7	54.7	0	3.909	1.197	2.968	1.057	3.894804901392465	1.7809564873379906	4.005233449338373	2.5854503151963377	1.7584452267959996	1.7795129588148335	4.0043916253656535	3.050785301413627	3.5453951746922563	4.464153907044259	5.980776819594368	4.196354075722029	2.624240025372566	2.295755255367644	5.043347004983863	2.5463200639717405	3.8548295692548633	6.254830743477847	4.716121401261511	3.455619191323044	3.7665672218217416	3.006521766343291	4.865148187709981	1.8083269748969928	1.5626554782943824	4.006858559266787	3.3700464904367644	2.556473519029492	3.571932216333773	3.686419295973464	1.7364696870176706
4-Ketoretinoic Acid Glucuronide	0.008656	0.1458	2.1987	1.6503	0.7432	-0.4282	yes	down	489.213	5.0922	M-H	C26H34O9	0	52.7	2.7089999999999996	0.8598	3.645	0.9663	1.9154280577996885	2.8190298701219683	1.829617875388324	4.58085474132462	2.9016841589252262	3.6263051528267636	3.1378536984211736	3.020016864668695	3.74721098330796	2.789726531893564	1.9072198825577973	1.7986418748765582	1.8974573492822515	3.789907972569214	2.958431644813686	3.4280752009429585	1.993548314194438	1.920646020138527	2.915815153529853	3.054046701664732	4.1409747409742215	1.932158785661584	4.79382373128792	4.265723374279859	2.6320028523138466	1.7850811631386942	5.084987034139721	3.620746525669967	3.012559438132404	3.976627935652981	2.9123079095790514
16-Acetylgitoxin	0.02102	0.18600000000000003	2.1982	1.7065	0.7735	-0.3706	yes	down	823.454	5.681	M+H	C43H66O15	0	57.1	3.486	1.218	4.507	0.9829	2.225229647392628	2.279792965087084	4.772177679428731	4.491710405960222	2.8488579205505835	5.14515479841766	2.3337594464338265	5.260537872399006	2.202862187048752	4.937532257252144	3.6750690084492574	3.638971367920009	3.6867067428626186	4.539096657811501	2.3222224536896485	4.443392259072888	2.3920883331087492	2.39487358272468	3.613297758741525	5.1443333842903325	5.02944578444642	2.274776697312187	5.195915946841903	5.322862723892642	5.114293960304753	2.1140446324120243	5.8088214325994905	4.556067122953906	2.405356013653412	4.794004441107443	5.688618910289122
Ile-Asn-Tyr	0.01406	0.1648	2.195	1.5041	1.2802	0.3563	yes	up	409.208	3.9966	M+H	C19H28N4O6	67.8	0	3.957	0.5367	3.091	1.2890000000000001	3.2831742140951015	3.16785670089252	3.23727084672922	1.2176320234605753	4.217326403235671	4.166118141507054	4.897498508858363	3.2554187396780145	4.172738070596506	4.0935822955417365	4.339955406897077	3.5409334503501446	3.8386518308454085	4.102411486724857	3.5116786173923766	1.3412814171521086	4.437081045713646	4.096538916772726	4.587488058560968	4.518304996189835	3.375937054407785	4.323681301783154	4.294131358415936	3.8684261968663103	3.9628468287486776	3.4227764580778253	3.772516165193765	1.199998430012054	4.5935704217834274	1.3346218691644438	3.3007019487552745
Val Glu Leu Asp	0.004564	0.1246	2.1906	1.5653	1.2421	0.3128	yes	up	475.24	4.0344	M+H	C20H34N4O9	36.3	0	4.048	0.5992	3.259	0.8301	3.7718229952956825	2.5238866503877544	3.4789405802175946	2.750997962526214	3.512926972029922	3.0966427257063014	4.061860306701088	3.0746004527243103	4.622982532731394	4.317419964015286	4.308870404400755	4.934987612585375	4.0908020877241595	2.573290353855449	4.36043551622059	4.297276765645254	4.054457566538861	4.801321904380012	4.394490075233033	4.640591410361884	3.745664348546927	4.183286613977498	4.036411856002454	3.5443726289308453	4.326068668664079	3.4495494361013934	2.6339785366185566	2.461805393965672	4.478175323095009	2.603736047298539	2.988328410005157
N-(4-Aminobenzoyl)-L-Glutamic Acid	0.01251	0.1593	2.1904	1.6096	0.7769	-0.3642	yes	down	249.084	1.8506	M+H-H2O	C12H14N2O5	0	47.2	3.263	0.9478	4.2	0.9643	4.668331448547439	3.980637447839257	4.381712167567197	4.967175645698333	4.171110340444833	3.2683024739229425	3.7424053594846014	4.197622513456793	2.199452222320119	2.5736636275935587	2.3761125010854527	4.338997450943989	4.054605316933592	4.980792407194075	2.3188072999032063	4.386551074562349	2.388670741585532	4.3141906279879985	2.372081395950848	2.432862053530436	2.1900450631667074	2.9338334916379787	2.3585571046899703	4.769225613275972	4.657	2.6114443316638845	4.612797536144488	5.030936887494408	3.650514345698067	5.515050563733604	4.879894014359062
Salicylaldehyde	0.004965	0.1274	2.1881	1.5377	0.7659999999999999	-0.3845	yes	down	123.044	4.5268	M+H	C7H6O2	91	0	2.521	0.6732	3.2910000000000004	0.7077	2.4645034291136096	3.815073077626234	3.4154597101100657	4.359695813742603	3.9328161538073863	2.515925525441016	2.0285647656808465	2.288238500100181	1.806233112876365	2.0029274402941306	1.981532028898679	1.871778722873124	2.4466801179056787	3.726529902796024	3.016344929779096	4.251014702504508	2.2964665361597048	3.0957916705785995	1.9775262531201327	3.0079762128845458	2.615429894193181	1.8775232557081285	1.964088668469452	4.036301636060856	2.783630277384169	3.2587269466071263	3.205360325820789	3.3305864487631567	2.007200683506382	4.415187885177588	3.030027530539053
Tetramethrin	0.004555	0.1246	2.1878	1.5776	0.7782	-0.3619	yes	down	332.188	4.8903	M+H	C19H25NO4	50.8	0	2.9219999999999997	0.6711	3.755	0.8270000000000001	2.504795803116235	2.1809763579569856	3.647067285536689	4.042407347356392	4.199669360167399	4.997500087253048	2.9888965094336264	3.5825746640984937	2.1041590705819555	2.3020978464009123	3.0501297626817037	2.2772789406282468	2.114862418452046	4.384684019864184	2.9872456427103504	2.267504484614576	3.3340973477618507	2.295920616655516	3.149135818683232	2.512775268708276	4.265233654961408	2.8681840095872366	3.1595091042474626	3.9840576067899134	2.183710560919236	2.0155001096168075	3.626811187121057	4.367421644505641	3.1001195024809105	4.8304547749322095	4.51608710582555
Asn Glu Phe	0.002908	0.1088	2.1846	1.5219999999999998	1.1859	0.24600000000000002	yes	up	409.171	3.82	M+H	C18H24N4O7	59.2	0	4.727	0.4292	3.986	0.8395	3.675584201879383	4.1873404171119555	3.945832802685776	2.676988999288417	4.725435762514827	4.190632603628382	4.722219906186209	5.125764187220371	5.21378350220163	5.085663326441546	5.1968375967849925	4.816398847940597	4.6412830573269535	4.1377293835384	4.9197578351991975	3.4348565255537107	4.831642392291277	5.183767688649804	5.0241495001402505	4.86564785858568	4.318189045715019	4.740338691285603	4.596508632999644	3.9258804219761534	4.900379081653601	3.88881621732794	3.1897742575571066	3.431270506107884	5.386467779316901	2.800316876487552	3.307950479508838
Trp-Asp	0.02423	0.1926	2.1723	1.9608	1.3136	0.3935	yes	up	318.11	4.2633	M-H	C15H17N3O5	86.6	0	3.787	0.863	2.883	1.258	2.2792195772663324	3.3845129179288618	2.5893946156287044	2.8288891751274337	3.0651004945958613	3.0289358806885693	2.6856069394959343	3.3132081009927568	3.6160708262988224	4.7262840055161535	4.732339948819979	4.23312346312886	3.393908450236809	2.7123042566601945	3.9414833488063103	2.6149784983524604	3.601291500376792	5.851595176958085	4.372749062014513	4.493947812475348	3.5681696403851384	4.235168283525612	3.872661148270992	3.273089907910062	3.4781804871454938	3.459982306453741	2.48001506703448	2.639853827767296	4.949654104148394	3.401319146037024	2.7756872170542075
Canthaxanthin	0.01227	0.1585	2.1704	1.594	0.8154	-0.2944	yes	down	609.4	6.213	M+FA-H	C40H52O2	0	42.3	4.091	1.036	5.0169999999999995	0.7573	4.2888448762002005	4.725969500796302	4.199475785200415	5.670699795475213	4.9471410981064645	5.311561623657598	3.754684064904045	4.759024551673523	3.36560843886302	4.329699597502239	4.613535222615266	3.161227795190056	4.045240442400035	4.844855047036587	4.158606497115991	5.4251852740140185	4.964004424148243	4.126961782378697	4.132574298094176	4.881303026834892	4.673768989783648	0.3375076030835509	4.2708354373154656	5.008362577427066	4.537048296025888	4.23865305146122	5.9210226094097065	5.4618414829087225	4.614801569050703	6.18224138652321	5.43359698682198
Tezampanel	0.02339	0.1916	2.1704	1.7296	0.7349	-0.4444	yes	down	557.33	5.4925	2M-H	C13H21N5O2	0	43	2.7939999999999996	1.179	3.802	1.082	3.0454329763455648	1.300768592964777	0.7065678638914528	0.8386811024105462	3.769453145910254	4.022175212107463	2.787922930037129	3.420798422513732	2.3573549978846002	4.191253417005401	3.3895795187435245	2.9613971991438914	0.7626648539439391	3.6670275518183817	3.6934595217846566	3.52737874908867	3.1770874040195887	2.7244279467117978	1.9098064596481072	4.169053296333471	3.88057375699589	0.7919258957284548	4.0400217191253915	4.347593633890948	4.248253224488504	4.114863342001884	5.187426599617791	3.3363812788466056	4.091911365946141	3.873121817616081	4.314154946053722
Liquiritin	0.0354	0.2203	2.1701	1.7845	0.6168	-0.697	yes	down	463.124	4.509	M+FA-H	C21H22O9	0	48.6	1.89	1.442	3.0639999999999996	1.445	0.5969644953379378	0.7290514220342652	4.431273548018863	3.1100312090686897	2.54192566918023	2.6576630369467567	0.6484387079367128	0.6467042249675534	0.459312287544733	4.0830062643461815	3.667473396806008	0.5116715314224505	0.5834433906205712	2.2599362852171985	3.119955283122103	4.582997090116645	2.9665127993013187	3.2535821652872907	0.6217748563873187	0.6966843265140321	0.6797229421977448	2.7697863037559616	2.8932412097922082	0.7518106681754575	2.3990225497458075	0.5021781057864729	5.556434891757061	2.843794354789975	3.104052422442596	4.163915584883855	4.441729083031067
Hydroxydesmethylpiperine Sulfate	0.033889999999999997	0.2169	2.1674	1.7636	1.2926	0.3703	yes	up	352.086	5.8986	M-H2O-H	C16H21NO7S	0	63.4	4.5680000000000005	1.232	3.534	1.3030000000000002	3.7962540517905587	3.3740850198125805	4.63767665574249	3.5632473632442747	1.8139351070386736	3.818431772769297	4.383174127721425	3.9150974993023215	6.909664149819722	5.371873143663911	4.707749734379946	5.118610803096443	4.882079061297888	3.3765318661106365	2.8566826502518774	4.248073925920926	4.8244787118154715	6.562994533490078	6.330023089090849	4.482224496523015	3.8105606654483126	4.4181728345343085	4.592012573067961	3.560054697952318	3.9957746180907763	5.744107433871821	1.759842945380684	3.656447716364886	5.6443985691388345	3.3465174220329312	1.7919115747574843
4-(Dimethylamino)Benzaldehyde	0.021269999999999997	0.1867	2.1594	1.7469	1.3228	0.4036	yes	up	150.091	3.7827	M+H	C9H11NO	36.8	0	3.6510000000000002	0.9672	2.76	1.031	3.7005623796134977	2.1875596811706166	4.616328983992935	1.9544191683061696	2.0437816798973345	2.2929560352933023	2.2566935847514498	4.954312880654597	1.9209210708266509	4.125924533901493	4.494856734678502	4.231091222970339	2.917726217415268	2.046517826483829	4.7561095757469785	2.0836994461945872	4.0605067097032235	4.2263320298353815	3.505587295065872	4.483178606446896	3.4280525916824542	4.073327211654006	3.387124118864552	2.0947381534964618	3.973235913916728	3.63684522007248	2.1068473412231983	3.9815038915037033	2.1224808439674847	2.076777360503405	2.066322011711527
Asp-Leu-His	0.01517	0.1688	2.155	1.5345	1.2689	0.3436	yes	up	428.179	1.8045	M+FA-H	C16H25N5O6	38.5	0	3.8080000000000003	0.8968	3.0010000000000003	0.762	2.7773390785636205	3.252761703058911	3.814917010977772	2.0532565369529743	2.9025753805509447	2.7292691082797123	3.5144590132019013	5.375849062891367	4.49818228837041	3.928029772224905	4.048226989527104	3.487705189556203	1.9638073238453557	2.05665312211604	3.216252005849241	2.0421350413530166	3.5868848168854828	4.513711572282615	3.7931620996107567	4.429966223640618	3.0857048569009566	5.6489930567306885	4.5116708820783815	3.1796759992000685	2.98919228293189	2.856794566685009	3.7482348689208895	2.032619557807776	4.6568905685099145	2.0575406889468173	3.024358404921447
Hetastarch	0.009899	0.151	2.1533	2.6129	0.8175	-0.2908	yes	down	701.284	3.4571	M+H-2H2O	C29H52O21	0	62.3	3.9139999999999997	0.7263	4.788	1.04	3.1555593603011944	5.547243718172954	4.23665978642445	5.132121780549699	3.2571491466693026	3.3281911117747565	3.2645964853871616	4.226246665078429	3.847109240040252	3.3321505057113625	3.6545722124335738	4.952993087040598	4.3526039282994216	3.2599086549215226	3.253011410028578	4.56847356913228	4.099244388285621	4.009902639236169	3.565304264963833	3.367493409847565	3.1236099726553386	5.320151794080479	3.7950277373764942	3.25287258962544	6.078243480169497	3.129229049020512	4.8912573037765865	5.261537125309268	4.904275416609661	3.2904168913135026	4.687922803937323
Pirarubicinol	0.01023	0.151	2.1527	1.4756	0.8199	-0.2865	yes	down	652.242	4.1254	M+Na	C32H39NO12	0	76.4	3.6830000000000003	0.8454	4.492	0.7142	2.782703955345583	5.405875068386512	2.905022890996092	4.8140912449284805	5.0379336878506615	4.552908513751519	4.343919057441485	4.35645000180023	2.7602370959033	2.9730127569365017	3.6417215985251774	2.8266400936363003	3.1496299866594994	4.817417850942653	4.516971267644057	4.744076647474053	3.5831311020874304	4.807333040524127	2.9335224292992006	3.6429610778887462	3.3359660605376336	4.059988467519977	2.9199556454812146	4.608733222978835	4.587490439292363	2.6709699269297986	4.4972115904711005	4.460316381115657	2.963468273362752	5.011617969083925	5.337858980193512
Lumirubin	0.02389	0.1923	2.1519999999999997	1.6152	0.7696	-0.3778	yes	down	617.295	5.4726	M+CH3OH+H	C33H36N4O6	0	58.5	3.4410000000000003	1.2109999999999999	4.471	1.104	2.18521178664944	2.239745461812716	3.0129709236058533	4.699936001932838	4.141271405263832	3.671417810392257	4.90792657326422	3.710004610098815	2.8323551019979507	3.0926024296662122	3.296569565207585	2.2289436692697904	3.3249823632671323	3.6544035840032896	3.706153826867016	3.742509317864141	2.9501409869385187	6.0589479787988125	5.165267574844727	2.396166492374252	5.578227101689238	2.23473176651812	2.321888012477996	4.637087605101036	2.242481953906609	2.074100017563661	5.691903590347452	4.744042157064116	3.9190208403106963	4.802022245814165	5.750594756583393
Galactose Lactate	0.013969999999999998	0.1643	2.1426	1.7973	1.1874	0.2478	yes	up	535.151	0.6059	2M-H	C9H16O9	0	58	5.632999999999999	0.7113	4.744	1.188	6.289969339394497	4.560684565810559	5.6182370550778575	3.153713891389268	4.053135542964919	3.249078935192573	5.490821933101372	6.537721469530253	5.197448020947734	5.187564172707648	5.54253938922228	6.502169224292443	6.175775046624661	4.4537123558776015	5.341917983661055	3.142499823860033	5.6830183047492575	5.5508173095150095	5.497001986802614	4.944338337282948	6.73334389180382	5.5216445238929115	6.600110115747744	5.142420006161962	3.0276062784883204	4.71350401690542	3.3669824800470978	6.352460212394985	3.624942101557169	4.005819680238218	5.625667971213238
(E)-3,10-Dihydroxy-12-Methoxy-4,9-Dimethyl-12-Oxododec-6-Enoic Acid	0.0069489999999999994	0.136	2.1393	1.5509	0.8167	-0.2922	yes	down	301.166	5.5515	M-H	C15H26O6	75	0	3.7110000000000003	0.4922	4.544	1.094	4.8312667931394175	3.9482155975537743	3.8426049050368607	3.79828300266576	3.785820001747163	4.984197733802515	3.4111890028662817	3.3062493304215885	2.8010715532295953	3.7265680979448494	3.2618483319729545	3.0030963094669962	4.774519318261096	3.8233177501967632	3.918325179753036	5.813954719043963	3.550439474568752	3.6669853151495584	3.588093552825634	3.73680351523449	3.8455450987586826	3.7847433222717815	3.73495104237246	5.282390565862523	3.6009401987714362	3.3368989855994315	4.366971376346365	5.4519717840318584	3.5701868459508392	4.368073626120561	4.684084365452552
Queuine	0.005553	0.1303	2.1334	1.6475	0.8606	-0.2166	yes	down	319.151	3.6787	M+ACN+H	C12H15N5O3	0	47.4	4.845	0.8475	5.63	0.3957	5.624026914308011	5.2846999838813415	5.0357792680687625	5.907798108989557	4.9713749806151215	6.238348270885266	5.506383201290107	5.424940662670078	3.279191334767776	5.578119781874375	4.665351142674582	4.347165534654367	4.485018376312394	5.803480683497582	4.155484411517244	2.56509305615251	5.276304860260637	5.644961523711897	3.4289746412651274	5.7162915427050365	3.0735548432128965	4.87258233353823	5.681104178365692	5.531242151283113	5.107718854037931	1.3684164892828428	6.037246893441206	5.615804497913243	4.66578009279291	6.021840329552166	5.873881675800088
Asp-Gly-Gln	0.001021	0.0694	2.1325	1.4797	1.1588	0.2127	yes	up	317.11	0.6271	M-H	C11H18N4O7	84.8	0	4.808	0.4174	4.149	0.5873	3.931038028532828	4.698186653335476	4.331469319609395	2.895458636833692	5.176457773790198	3.9336386045343814	4.369730346053766	5.126345312258801	5.084763836789821	5.365030032308515	5.053235897010146	5.066825378696993	4.655489756863448	4.290816656264966	4.643254256661613	3.992041210135545	4.6307622787842195	5.122025380076627	4.578559530442387	5.210434073157847	4.153630670311137	5.4055598472106245	4.743160205520526	3.3389226480159766	4.803401854067814	4.274456600437175	3.4902738265388216	4.431035972861325	5.193729671528655	3.7527719094561247	3.5893793248091943
Gln-Phe-Asp	0.004025	0.1181	2.131	1.472	1.2039	0.2677	yes	up	409.17	3.3503	M+H	C18H24N4O7	39.2	0	4.24	0.5151	3.522	0.768	3.8650368977546723	3.706041586511632	3.4429901063943653	2.7507195614951385	4.0606653687561245	3.528451924320497	4.473306930128018	4.3387262108596225	4.209294166743775	4.826489643288161	4.8111815640836015	3.9905975128952007	3.983223464811259	4.099101655475563	4.308298730010753	3.856035751812868	4.440790396707025	4.169098066775503	4.604271997260889	4.5446996443227	3.163113909132161	5.416068509616107	4.208574838910466	3.498522611970485	4.3279732606354635	2.6172258542806595	3.2962491553553845	3.1177978127312183	4.804047280584619	3.487663456987052	2.8348410334111454
Roseoside A	0.03207	0.2124	2.1285	1.4565	1.3038	0.3828	yes	up	431.192	4.5784	M+FA-H	C19H30O8	39.2	0	3.845	1.157	2.949	0.94	3.951573342371668	1.5956361387508224	3.878044857111232	3.3466579436346544	2.147285024549424	3.6369764611418858	3.1394800865610217	1.4949317969388485	4.7850583623910214	3.454003535439154	5.0467990420648094	5.196385163524459	5.09587389317331	3.213205619602652	4.263606195652193	1.4906247075848178	3.5553164538097213	5.1972757310998805	5.063946465724106	3.1718210528258486	4.184321537600615	3.7181123631935855	4.117266612991453	2.3944500562206743	1.3798695884550771	3.4605370939087545	2.7793247364383693	2.9320991247177006	3.627040045589186	2.7381440188996127	1.5515689417555367
N-Acetyl-B-Glucosaminylamine	0.01881	0.1804	2.1237	1.6727	0.7675	-0.3818	yes	down	265.106	5.2257	M+FA-H	C8H16N2O5	0	47.7	3.03	1.048	3.948	0.9149	1.9241182194958444	4.80351944540921	3.9017924035136633	3.2873737774571685	4.23878583592799	4.365794437843933	3.1503235153080333	3.850368616373532	1.7307844919077506	2.6179046236361843	1.915908025214636	2.9361301318978668	4.012980426382532	4.1295226946181325	4.410331956842966	4.484693385224494	2.4447535496528534	3.3562995019287736	1.9566405858514813	2.051675177334256	4.3353394826148435	1.9408529464453828	1.999143479056924	3.561056929502338	3.8256011194191135	1.793734281668694	5.144050383184213	4.480725119794915	3.2494639159422207	4.9618780189033895	4.265918728687923
Ile-Asp-Ser	0.001979	0.09472	2.1183	1.4609	1.1882	0.2487	yes	up	332.146	3.4409	M-H	C13H23N3O7	51.9	0	4.136	0.3522	3.4810000000000003	0.7193	3.515151403953916	4.365858294470262	3.7793071946672407	3.2323365514124984	4.683205449729831	3.8311562962966894	4.320671716576112	3.3827183012978472	4.143714675785903	4.161641640122258	4.565050048015854	3.839294750429811	4.2804962726079845	3.866713810008612	3.8210498302493323	2.411798620969622	4.03485808265122	4.368802201397866	4.4185194228005304	4.543860241987106	3.9673289481114256	4.313716013670958	4.083632110078368	3.501552773940239	3.9377405034868014	3.2551090162219523	3.4956105461184945	2.852922837047952	4.684114819558231	2.6818551327394	2.7895140483435443
Polyoxyethylene Sorbitan Monooleate	0.0009211	0.06561	2.1151	1.5503	0.8845	-0.1771	yes	down	585.4	6.2024	M-H2O-H	C32H60O10	0	40.7	5.2989999999999995	0.602	5.9910000000000005	0.3007	5.282022679227628	5.556210850282196	5.478892994954118	6.223927508248013	5.644080637539487	5.868468506981031	4.623245486852888	5.514998789312863	3.4378843283244573	5.552527158340629	5.643538078565072	4.739766816960706	5.290624759023434	5.863103176781353	5.337718345562551	6.499814769968013	5.781833054816937	5.758529782754959	5.277627519408641	5.933718126552235	5.6405284033868055	4.460689152565086	5.717380586309233	5.772387727705362	5.837390476326356	5.400347982379265	6.454680261689175	6.123204644320055	5.7278387313259875	6.372591125264362	6.09447013262684
Asp-Gly-Leu	0.0035960000000000002	0.115	2.1122	1.4459	1.1671	0.223	yes	up	302.136	3.2589	M-H	C12H21N3O6	76.9	0	4.623	0.4293	3.9610000000000003	0.738	3.9347627335485136	4.360921696464753	4.2397482407765485	3.7784730807569193	4.571475597686229	3.6674517811113394	3.764595469350591	5.428425184433183	4.650526168875076	5.144580305804388	4.400995346110721	4.557622259975172	4.410351379972222	4.105050540728576	4.61543	3.5406179597910405	4.271978864552594	4.942192311218947	4.630197189172347	4.8892520419091	4.808941518876279	5.286673699533436	4.934315907741372	2.66055810788612	4.448901723992996	4.1672610558264624	4.024516229065195	4.384973311800675	5.2121542230484215	2.9346208726532046	3.460286040248784
Phenyl 4-[[[3-(Dimethylamino)Benzoyl]Amino]Methyl]Piperidine-1-Carboxylate	0.01014	0.151	2.1101	1.4569999999999999	0.805	-0.3129	yes	down	382.215	5.7718	M+H	C22H27N3O3	45.2	0	3.2539999999999996	0.7485	4.042	0.8222	3.2591575863470954	4.317382529808088	2.356592090283145	5.1843463496581865	4.451132257466047	2.4633106690944047	4.51844571777203	3.7126625219346994	2.9272128305963427	3.4960658224222447	2.4742690833011967	2.278480573919249	2.223070643645352	5.4083843486057095	2.5775641271446896	4.643691210364487	3.5639825066802127	2.9484299127127924	3.521450698376219	2.7415061186020298	4.210263188362283	2.8159600921486807	3.4295550548747338	4.424551448429293	2.6035058036705134	4.487394915421565	5.23730939634533	3.5009043543583567	3.2951497177277567	4.7469664383342005	4.407516319732967
Dihydrocapsaicin	0.003998	0.1179	2.1089	1.841	1.1676	0.2235	yes	up	308.221	6.1951	M+H	C18H29NO3	75.1	0	5.093	0.6536	4.362	0.6002	5.384860365224767	4.863022143578795	6.850014170790738	4.328002418312392	4.269412069134481	5.473575159414467	4.892363162663551	4.841683030634068	4.044921844422004	4.792058612603918	5.8715309425011935	5.706917507293179	5.003979362920121	4.839227353409335	4.615879220312039	3.8079741878236817	5.1306448662770725	4.175544315288293	5.003034360313526	5.164815840508622	5.306001088490447	5.140679900208665	5.701472872670474	4.114920258794461	3.6730749105438636	4.330302410307178	3.58519344499802	4.9473825454310045	4.346958761991136	3.554886188065752	4.50660757999237
N-Di-Demethyl Roxithromycin	0.031389999999999994	0.21100000000000002	2.1	1.9699	1.1883	0.249	yes	up	845.479	6.1898	M+K	C40H74N2O14	0	54	6.322	0.8612	5.32	1.611	4.8711563284114625	4.787036723394096	4.900502728924304	3.231530300011107	4.973712268640897	3.392798150242636	6.5047709529415405	5.4239022326588415	7.052913816474008	7.0586635151828245	6.779425004067928	7.150226216079142	6.832918354389213	4.830595154804376	6.700135938054978	4.3857312284602985	6.8196187250217175	6.7798248386029965	7.081118966057463	6.796318096081968	6.256372813338658	7.075513716178725	6.2709420452242295	4.945635830816869	6.9792375659414665	6.855112221554773	3.3853238542428508	5.4386529750345876	6.8179022074463616	3.3550213663239847	3.3444812973649247
Acebutolol	0.00762	0.1409	2.0976	1.5227	0.8089	-0.306	yes	down	381.202	5.5728	M+FA-H	C18H28N2O4	0	41.1	3.378	0.6153	4.176	0.9389	3.299299830165648	3.5834599341002136	4.3044292698124025	4.281698578964205	2.5650662161066307	4.893907703620791	3.5707095898426653	3.533178638608362	2.224070913829876	3.0679915098861623	2.6192507419275515	2.6095742010813163	4.144241209750149	3.77517836958537	4.100984995477119	3.9866369599863036	3.9833108484373456	3.088958415212813	2.9018357497716485	3.1418368765067246	4.008144461107892	3.9625433210666143	3.4795254191135263	4.920281912578449	3.6462810229616487	2.4043561705509124	4.969400013958705	4.6624686813824905	2.96867059707834	4.509412280210364	5.017597457592286
Lansioside B	0.007973000000000001	0.14300000000000002	2.0877	1.6479	0.8473	-0.239	yes	down	619.417	6.3118	M+H	C36H58O8	0	81.1	4.689	0.9001	5.534	0.6161	4.868982395305552	2.8700442896613083	4.1207009935685965	6.022707611172316	4.825143443814183	5.621121872462058	2.924209777237018	5.24238695368979	4.25098049071656	5.1445019453348655	4.687825230447756	5.0309142452677085	4.759480584012062	5.815095642913432	5.325743617655737	6.028978889602161	5.868622838879294	5.592695187843641	4.999601221524586	5.357363188177564	5.149405514149668	2.8650082318274177	5.201352545510933	5.094836496355825	5.150920258537979	4.978000254031617	6.325001906927137	5.700679232083032	5.557008878624847	6.6964928286145815	5.489787957384978
5-[(4-Ethylphenyl)Methylene]-2-Thioxo-4-Thiazolidinone	0.005382	0.1303	2.0861	1.5375	0.8391	-0.2532	yes	down	248.021	0.5792	M-H	C12H11NOS2	0	49.4	3.6860000000000004	0.7109	4.393	0.4939	2.8350824953370983	4.462395102717539	3.829742155590952	3.59600324634438	5.296288131707393	3.7641521710342793	4.2110340114066105	2.9003620696997405	3.826574649285739	3.644292406946125	4.234313072520406	3.9734412262296295	2.816913229749127	3.973189782468023	4.696962231666939	2.8959175196243514	3.168020039898613	3.7640147998556297	3.7482342829479167	2.9638065535534825	2.942494179264892	2.8519907615159656	3.8650925784251235	5.336391274959543	4.091248448919648	5.0783647127712515	4.064948322959078	3.805985458868901	4.195116523502525	4.789889134961182	4.9412430875179885
Ile Val Gly	0.004555	0.1246	2.0801	1.4099	1.1597	0.2137	yes	up	288.192	3.1202	M+H	C13H25N3O4	54.2	0	4.851	0.3379	4.183	0.8545	4.739792394820904	4.3007280473877225	4.778613854874635	2.7406658943881643	4.295401804121284	5.002423140026021	5.553464027458074	4.854382695042194	5.062306828131621	5.058077085048903	4.828100826514799	4.822913414236118	5.024240637413006	5.0546432879483065	4.0993862843608415	4.0029046407006685	5.07671679145757	4.915111078109454	4.716220568604694	5.2069287728530576	4.876499701280176	4.8999083755315125	5.064796326078016	3.5875590553392542	4.504090873311458	2.400336765957304	4.309409893121615	4.171174606297658	4.9773344471912315	3.305063097668934	3.757477319512042
Phenobarbital N-Glucoside	0.0002682	0.03386	2.0787	1.7302	0.8866	-0.1736	yes	down	411.137	3.1256	M+H	C18H22N2O9	0	69.6	4.654	0.4137	5.249	0.34600000000000003	4.536705155443489	5.92640398549469	4.453639967439724	4.0999033756527234	4.573149324265702	5.432034008421901	4.989835097184909	4.553521948460472	4.734052332930221	4.909012278672597	4.591377060681689	4.394835080856377	4.5947529351689305	4.7790135145751815	4.402808951997666	5.0338515744779295	4.826637564991287	5.193472458228328	4.364859526434757	4.50614485043983	3.9047734318881733	4.5882768414923865	4.375764528764272	5.144313542780577	5.521396714482813	4.654413131403167	5.285211612258002	5.342688881953509	5.739631768611917	5.65932501914646	5.249949736488087
3',5'-Dihydroxy-5,7,4'-Trimethoxyflavone	0.0286	0.2039	2.0778	1.9452	1.4107	0.4964	yes	up	389.085	4.2311	M+FA-H	C18H16O7	40.9	0	3.105	1.122	2.201	0.9632	4.677452059657051	3.1186642348330724	3.6283540301088215	2.6139779941111145	1.4067542977974814	1.4273664390961889	3.7042845449690316	2.4771895812482945	1.084303196679618	5.419197354073334	3.6605946213469798	2.407331885316464	3.4202682187159836	2.443192214366708	2.8498859598534687	1.936864877228919	3.9683626972620063	1.2723761035191192	3.983864886006197	3.5395382974575638	2.325745729083024	3.354284325580581	2.702612075766474	1.4555913682324897	3.215715629408225	1.1434285412105372	3.3913828530325207	1.316069785284334	3.0816172148156653	1.3400359285911152	2.7802935935367703
Austalide G	0.008616	0.1458	2.0768	1.8129	0.8265	-0.275	yes	down	517.244	5.9577	M-H	C28H38O9	0	54.5	3.905	0.6651	4.725	0.9574	3.7699744530438215	4.526767319178945	2.7710561076148053	5.552729297504723	4.910274074413674	4.570714657359742	3.3336090765073867	4.156988931958315	3.3328365335756027	4.252151452818659	4.430539131224454	4.219247053957445	2.839730542597364	4.359192205040462	4.670459585223512	4.582088933332327	4.632272563933341	3.8500417379317273	3.294421575934074	4.7421484897337045	3.68315542302186	3.6669186902720607	3.120197797656101	4.655019301815465	3.7437063552998286	4.5857377044197385	4.982188594725992	4.172861900825773	4.742046724509524	5.567991258821769	2.9815087283323587
2-(1,3-Dioxoisoindol-2-Yl)-N-[(5-Methyl-1,2-Oxazol-3-Yl)Methyl]Acetamide	0.02309	0.1914	2.0745	1.5324	0.8243	-0.2788	yes	down	300.095	3.6872	M+H	C15H13N3O4	43.3	0	4.194	1.173	5.088	0.6636	5.329906232943032	4.847806628979597	2.6512595121331097	4.980951000047595	4.228306569306574	5.821078293656544	5.08658797063304	5.4703069356310055	2.5066436384828963	5.344919348315019	2.6837715559102144	2.572961664878658	2.5173976363785497	5.296315191148729	4.493489058770642	5.680143338240073	4.7794359768262895	4.1714462566615484	2.679731767910665	5.166519946675164	5.4752802400876535	4.542593388806784	5.144662860181833	5.164900139144416	5.274402297236092	2.417513192659932	5.588712946379046	4.860531964646759	3.86923028511352	6.229028861081242	5.534255862612407
Sinapic Acid	0.0036969999999999998	0.115	2.074	1.5759	1.1983	0.261	yes	up	223.061	5.1028	M-H	C11H12O5	96.4	0	4.242	0.6729999999999999	3.54	0.4638	3.6961432072000098	4.254761948545691	3.7433587395326873	3.1467376970824152	2.7719322256799863	2.81622933667886	4.046002382102408	3.2597877518348923	4.991317910608043	4.468652939424518	5.260627193818566	4.8257062659039685	4.484326444160448	2.7530764777882344	3.496938743892013	3.14058448309482	4.503201497036732	5.109759238697941	5.1478509016404805	3.892433238562458	4.406845683092281	4.200864590561647	4.0316043337280085	3.5251556661006265	3.050342349245076	3.80625400525185	3.3763803183798986	2.9758100247872714	3.9066117824148567	3.658680230536476	3.5723916660819177
2-Ethyl-3,4-Dihydroxyfuran	0.0008289999999999999	0.06155	2.0709999999999997	1.4313	0.8167	-0.2922	yes	down	170.081	3.3183	M+ACN+H	C6H8O3	0	43.9	2.695	0.3913	3.3	0.5091	2.296316951802696	3.143214483966441	3.417988880369182	3.26146795105627	3.431049494987667	4.338139278435014	2.5375576125530803	2.5939117212245715	2.273928734141379	2.660478036431168	2.450734409793462	2.3401105363214505	2.2846592082327897	3.451679910275563	2.7225177739158446	3.5200623644726483	2.897763848016116	3.1181258798324887	3.1018073197329112	2.8560346210682708	2.2705445376753124	2.3741934245732432	2.4331670667202743	3.621737181721914	2.543929678679207	2.7465029786293447	3.450051851215989	3.310963492775016	2.780233113662983	3.553021874706149	3.67156232607108
Cer(8:1_2O/6:0)	0.003841	0.1164	2.0663	1.4954	0.8239	-0.2794	yes	down	258.206	4.6552	M+H	C14H27NO3	69	0	3.3360000000000003	0.7464	4.0489999999999995	0.2941	2.4995622898578223	4.5794572942899565	4.354631105363809	4.769489120379878	4.413562846097643	2.948070158777027	2.6083613452435177	3.4408088160054486	2.4771304470487348	2.7581588743023606	3.750347500211365	3.3718250829447745	3.7024652863157486	4.10188158579467	2.5967988269792737	4.247388018632623	3.943091130024869	2.6695999240016373	3.2630856626295026	4.218972581801741	2.4676947267309317	2.5492406507827594	3.721008304177533	3.95814969576115	3.608089821614127	4.325960122761419	4.275342392296087	3.643580175396033	3.952552803446232	4.518679543414785	4.007774169450006
1-Oleoyl Lysophosphatidic Acid	0.009144	0.1473	2.0661	1.5746	1.2376	0.3075	yes	up	435.251	6.6876	M-H	C21H41O7P	54.3	0	4.209	0.7983	3.4010000000000002	0.7609	4.275745961766048	4.693576596589579	2.3978272602828525	5.108653528544088	4.350577167481448	4.49479279926783	4.0322820435575375	2.5496597910296592	4.72316500022954	4.111568575715637	4.141915048373596	3.5632048140234085	5.835531867420968	3.375805703030616	4.215227417820638	4.876116447076225	4.520134623784178	4.227791450693596	5.166466895581835	4.028171569257989	4.6814147348467925	3.712341286697824	4.747417960050661	2.680821525654752	4.318516289590945	5.061579189573802	2.5753626284059687	2.535646299131175	4.10719848907893	2.560722962749721	2.6078942866814985
5'-Amino-5'-Deoxyadenosine	0.03966	0.2293	2.0659	1.874	0.7809	-0.3568	yes	down	265.106	5.0545	M-H	C10H14N6O3	0	43.8	3.418	1.205	4.377	1.209	3.852325895581655	5.426988127123709	4.535663158312829	2.865653684638943	4.732595082374852	4.942323257012934	4.134808718866677	3.015474314739416	1.4647887225645744	2.99402045118181	1.64749339464095	3.438261366359748	4.052259550447572	4.4305999038372175	4.696175628773534	4.780894335288875	2.7541724026261827	3.7790845721228297	2.340688910147708	1.7820336557250755	4.465534362597022	1.6721835088951609	4.166311876496404	4.808940895901436	3.6738437071258265	2.456512649121977	6.053089002203307	5.44232898184912	2.595976589617901	5.278410561926983	4.991542038999746
Toosendanin	0.04173	0.2345	2.0644	2.7769	0.7835	-0.3521	yes	down	619.245	3.0974	M+FA-H	C30H38O11	0	63	3.448	1.2329999999999999	4.401	1.181	2.605761216108305	5.453719668129066	3.8665097209133	4.657523008602508	1.7107938442657065	1.7318192433649886	1.6339398149196145	4.50502032939333	3.8933143269129715	4.477737187769601	3.8122544905746696	4.604755292570878	1.55033	1.5633551937386616	1.6606037527712534	1.6274077811527268	3.594141669215969	4.243056051555431	4.5006988922632	2.8821285023980643	2.858953889756948	5.011154101323358	2.644750445968214	3.68261878519858	5.794112998269157	3.3562465478420984	4.3797979050594975	4.953848344070686	4.178600616630095	1.6425917852041865	4.317850994568005
Gamma-Glutamyl-N'-(2-Hydroxyphenyl)Hydrazide	0.01627	0.1715	2.0643	1.5224	0.6965	-0.5218	yes	down	462.188	5.7171	M-H2O-H	C23H27N7O5	0	70.6	2.022	0.898	2.903	0.997	1.6825483914668058	3.502780925892157	1.8550628350878364	2.9568600205653577	4.128888227455287	3.8731818255192993	1.2808042624801337	2.344429512805045	1.0355341055261775	1.8406126613222158	1.2092114025654672	3.087207622087428	1.3180008442820343	3.3782419418751326	2.585749693682204	2.686050736078582	1.2916068867904729	2.758299097278196	1.2479859969239426	1.864631774358965	1.3187448292262236	1.2329365730331991	2.8309498571708898	3.9527587132426483	2.3016911503162967	3.063445823550597	3.5083168606684434	1.871645319383085	3.035788329330965	3.3407756335077106	3.435443385599377
Asn-Asp-Ile	0.0006377999999999999	0.055029999999999996	2.0612	1.4107	1.1415	0.191	yes	up	359.157	3.3927	M-H	C14H24N4O7	86.2	0	4.743	0.2712	4.155	0.5801	4.226885854826159	4.54369696146684	4.067877796049577	2.6569603848236207	4.905304093336025	4.556045524782831	4.738865252004922	5.056733072432213	4.780651856672816	4.94402110888496	5.018198637143929	4.762996608767322	4.7072158906374195	4.076050544515496	4.652245642748025	2.465730290560507	4.733627548358388	4.864573975192786	4.903673124019334	4.9852519786976215	4.474464547797523	5.1015166741915685	4.645032264570916	3.9337940149438144	4.608202445861714	4.043451353565774	3.4460084546552885	4.288449329073536	5.006682154494892	3.5525522135098018	3.6781742642423634
Puromycin	0.01225	0.1585	2.0601	1.5231	0.7919	-0.3366	yes	down	513.26	5.9178	M+ACN+H	C22H29N7O5	0	67.4	3.3680000000000003	0.8595	4.253	0.9576	2.334922481423434	4.120534480842725	4.606454219183406	4.621458832935766	2.4361562735380007	2.5069942685865745	2.4435806359292376	3.9325846146362538	2.93939662103168	2.510943244049844	4.3971732527421965	3.78705521402726	2.3232596322373777	4.369408057205025	2.432031473291376	4.135433562227709	3.9332535938835074	3.639863700591068	3.2009257612614954	3.9953124775150446	4.782078049721973	2.3845321225677227	3.800903399400797	4.070814165102922	3.4004759763943846	2.223568042872353	5.9763842596053625	4.53312642189768	3.6727292617644216	4.628344082721691	4.7935889291055975
Asp-Leu-Ser	0.02291	0.1912	2.0556	1.4124	1.2764	0.3521	yes	up	332.146	2.8812	M-H	C13H23N3O7	95.4	0	3.556	0.7925	2.786	0.9837	2.507649489626945	2.0103152905570134	2.9120167663434917	1.9144809872158184	3.2383081448993165	2.0088617727412585	2.7753568062054246	2.9372182824967523	4.379316692581879	4.306118086609402	3.865687765152098	4.380399300406488	3.937356350797687	2.0440455138849942	3.9636831141182807	1.903397342996288	3.6327127706078746	4.79024971907589	2.977493904774863	4.550207723603169	2.6200377152651937	4.0055803475452505	3.778710443258287	2.0378689926644262	3.0853090601198474	3.595200770995772	2.8036924098085687	3.845186685818694	5.083556848966354	1.918750814146104	1.9655047410403408
1-Cyclohexyl-3-[2-(4-Ethoxyphenoxy)Ethyl]Urea	0.027569999999999997	0.2014	2.0543	1.6222	0.7873	-0.345	yes	down	307.201	5.998	M+H	C17H26N2O3	59.4	0	3.502	0.9226	4.448	1.3530000000000002	3.5801234320928987	3.3003637838014845	3.521317635713469	6.1362836444000335	3.2985165266569023	4.128974556341808	4.632875454956674	3.578525656621772	1.5849675899805995	3.21881971055764	1.676065810258245	4.028802379088659	3.589346015450832	6.254772974010904	4.023633313078114	5.205482397292557	3.842758502040612	3.758995062403792	3.661130123255284	3.1135859756726547	5.857967172798027	2.8867822700632186	3.3788476191994663	5.5734269709654205	3.422388380493276	3.1300140929501548	6.4640973665073895	4.858016495187552	3.1179399165028436	6.020413000789232	4.637443694806969
Val Glu Phe	0.001813	0.09300000000000001	2.0533	1.4253	1.1491	0.2005	yes	up	394.197	4.6605	M+H	C19H27N3O6	62.1	0	4.763	0.3032	4.145	0.6908	4.187982347815051	4.791782592851182	4.35267870531051	2.9520215400587184	5.0112959345756325	4.35619858062549	5.179281176998214	4.394305267238535	4.963804330221478	4.728137348670977	5.269261109329271	4.649034366367793	4.676900213914569	4.462011542998133	4.722883645204534	3.5336775677105297	4.997632772038086	5.171238099798977	4.607168399640934	5.058389711941016	4.4674097109789725	4.697123027465693	4.564772449472357	3.9755368779827536	4.8585794017401165	3.6297010856829575	4.001495528462411	3.971017484865337	5.0691557261901625	3.786160102886476	3.064919787217515
6,7-Dihydroxy-3-Methyl-3,4-Dihydro-2H-Naphthalen-1-One	0.024390000000000002	0.193	2.0503	1.6306	0.7483	-0.4183	yes	down	193.086	5.2322	M+H	C11H12O3	56.8	0	2.783	0.7205	3.719	1.472	2.155570256915205	2.3070789344913845	2.948057314005168	4.275524561538005	4.8020357336561	2.3521700608519738	3.365144264854743	2.312446735106322	2.64207222351544	2.6994043097717957	2.435520085689871	2.4054456898550773	2.14393548830928	2.764607966540392	3.1710420962250985	2.2966420143241963	2.322284560415864	3.4037558987759624	4.183979622995541	2.36644739763328	2.565534075624252	2.3486930653766267	2.29219205418784	2.7712826309614105	2.360297406286013	2.0445172535929865	6.6174680639024555	4.031078164262481	4.084808886039312	3.4388480410865783	5.141161359869555
S-(9-Deoxy-Delta9,12-Pgd2)-Glutathione	0.03968	0.2293	2.0494	1.3857	1.2272	0.2954	yes	up	700.316	4.8083	M+Hac-H	C30H47N3O10S	0	82.9	4.623	1.222	3.767	0.7849	2.93672669972082	3.8634342619142217	5.71541277121941	2.4425507242043487	3.292242599346587	3.7318497578637646	2.986935597592385	7.070054567078061	5.614998153825253	5.116680360734269	4.345708129069361	4.646028106596132	3.8925657399590916	4.66473355448534	3.2461888833127506	2.8935103847685424	5.243994169656752	5.381097757451958	4.058398594050064	4.3771645616875885	3.669907231317016	6.877022004528817	5.51036859015673	3.583539144805364	4.280441549094754	3.8700651351702695	4.320947752975822	3.5407289094975	5.534422397362954	2.4468573981399486	4.091749291692263
Ile-Glu-Tyr	0.0035770000000000003	0.115	2.0484	1.4557	1.1832	0.2427	yes	up	424.207	4.0824	M+H	C20H29N3O7	85.8	0	4.295	0.4517	3.63	0.7197	3.9693814681404787	3.727719173402543	4.1891596518000735	2.1985960406724168	4.7040513136808615	3.752813779548968	5.087170042089318	4.861514084276294	4.326183529533323	4.301330680894893	4.231670016384498	3.5354916835770225	4.400932999533041	3.526136177920983	3.709396140873977	2.328416068893125	4.306672554989701	4.457755228630826	4.381536459586726	5.181575181898209	3.8595258520734417	4.454347487593499	3.9114598588067495	3.6562366264661232	4.203805409969624	3.1072809930205687	3.1837428525755733	2.179921824533689	4.59237791970904	3.7062483460059417	3.0880663918695226
N-(2-Methyl-3-Nitrophenyl)Cyclohexanecarboxamide	0.01004	0.151	2.0462	1.4258	0.5626	-0.8299	yes	down	261.125	4.8244	M-H	C14H18N2O3	70.1	0	0.9811	0.6953	1.744	0.8351	2.2572539269576994	2.0421909961967324	0.84729085151888	2.084920202986032	1.5112615376463605	2.025507850046326	0.36234216256998825	0.36107701525089897	0.2329486485357977	1.990234692444893	0.8887874771074556	0.266972666270755	0.34385773594677405	1.2078708175610595	1.0196624030907988	4.670442287746009	0.929939148748642	1.853104767740815	0.9472937140426348	1.6790865641665775	0.4061801986704552	0.3343987022114013	0.3670284925220224	1.6636440958950924	1.6879242993234371	0.2606974801129208	2.7977713651537663	2.3331428360435496	0.30320638674898753	2.09758244803508	1.9294920819250976
St(24:1_O4_G/18:0)	0.03325	0.2153	2.0449	1.4431	0.8166	-0.2922	yes	down	714.567	6.7249	M-H	C44H77NO6	66.7	0	3.937	1.315	4.821000000000001	0.4472	3.4246457779110773	4.641204893366038	4.5923440160761375	4.963673521747325	6.032905072065352	4.0956522126726185	4.419893760310499	3.441397867661313	1.4160613374288011	1.7083986303815024	3.5542114984349014	1.491160145649846	4.531940826105392	4.508515503987203	5.324546618875576	4.828802707231783	4.819821124838917	3.7254466422205015	3.783721366716165	3.1732095258769286	5.283821532863558	5.385773194222167	4.0607775632585845	4.343619905033246	4.7636501317713025	3.3695416467617427	4.854251330838765	5.223489593812318	4.112935226470773	5.3819768484322745	5.079975448283191
Ile-Thr-Pro	0.0037329999999999998	0.115	2.0438	1.5478	1.1569	0.2103	yes	up	330.202	3.4996	M+H	C15H27N3O5	75.9	0	4.622	0.4952	3.995	0.6043	4.5229092870865735	4.155918114169753	4.871898793100028	3.8490790602052094	4.24892604187702	4.895794327401954	5.31818894677908	5.402334123973712	4.1459535937318845	4.424058457229524	4.839884889949259	4.111709192513087	4.915800401639197	5.065909576670394	3.7660194691350912	4.5346656296895835	4.446362785396758	4.037226081695005	4.6524728142385685	5.6088758788849855	4.784014261679476	4.5884000794798965	4.97441639714809	3.934051969780348	3.867353206595542	3.4153910045744187	4.237156801498649	3.760707055788418	4.3428904292067285	3.640863964250101	3.4827602182256854
Gly-Glu-Gln	0.0034439999999999996	0.1144	2.039	1.3976	1.15	0.2016	yes	up	333.14	0.6287	M+H	C12H20N4O7	53.7	0	4.976	0.3667	4.327	0.7652	4.265764555448078	4.760953100473296	5.198470822363878	3.914826473747958	5.015446586895116	4.22517749721711	4.745227629678216	5.5837755828913735	5.214591746560071	5.027874532448781	5.49205683198951	4.534372853135023	4.826850776645301	4.5493341833489644	4.751459789825066	4.510170278923409	4.851525307573287	5.096883652170552	4.869470819102647	4.872682741701818	4.611291395317972	5.756428162779787	5.067256696981086	3.9175978759110586	4.7017952927346505	2.0857200616879017	4.008022604172052	4.530251857450606	5.514693112145517	2.331054665059253	4.372799719786101
Phorbol-12,13-Dibutyrate	0.00271	0.1056	2.0372	1.611	0.7785	-0.3613	yes	down	539.243	4.803	M+Cl	C28H40O8	0	70.2	2.555	0.5124	3.282	0.7232	2.3001424981791603	2.4684736218674006	2.2136460708928283	2.3719495270854583	2.908665090843475	2.46701074555641	4.3042563978250605	2.3652066390558524	2.105105073643715	2.4041416938509697	2.2918744303579883	2.4091519332926885	2.2820391621112	2.29536211898974	2.394600530746794	2.360775754942229	2.37877919060638	3.2254278982800946	2.332883589911268	3.0650906091408467	2.407215898970042	2.3169918310202338	2.37564857545107	3.1812639739282638	2.915903189227204	4.686062225090074	4.486118688118448	2.3512144636551757	3.684083598974812	4.099351636902235	3.734298770537793
Remikiren	0.01955	0.1823	2.0348	1.5722	0.7918	-0.3369	yes	down	665.318	5.6797	M+Cl	C33H50N4O6S	0	73.8	3.4410000000000003	1.038	4.346	0.9139	4.260301040403924	3.5694767843250803	1.4860650705136886	5.126883396125793	4.1902682553253845	5.065777372222163	3.1564828839576897	4.200994559844268	3.1389871309190918	3.7122492308572816	3.178028603082105	1.4556704032017955	2.6828274352768062	4.505143280807267	3.749345821917851	4.49709962097079	1.647514548597451	3.7621751727909083	5.118299896958118	3.4151974524039668	4.974391196377674	3.93045279682378	3.748284449009915	4.92396935049874	2.9508948892828517	2.9590167068046265	5.482065039990693	4.944725391873517	4.704050354707672	3.846601422589901	4.546932050212527
Vignatic Acid B	0.005854	0.1306	2.0325	1.6432	0.812	-0.3005	yes	down	518.283	4.5784	M-H	C27H41N3O7	0	69.5	3.0789999999999997	0.5144	3.792	0.8245	2.8257134599303746	4.189503285890494	2.7388786416710817	2.8977543331118563	2.9716608096643844	3.7410141711884815	2.8932266409811764	2.8909910991920267	2.6298050694715416	2.930039386222336	2.873447851733136	2.707479428164373	2.80754478673518	3.8805142212973682	2.920471409602583	2.886546671840962	3.4021302865206366	2.8309873688808187	2.8602760897708763	2.95443396146986	3.716744493556036	2.8426211966542985	4.519263632146408	3.0223270956611605	2.7717292297068292	2.693723588573558	4.567813941258444	4.682524334720756	3.0787312379227223	2.9982346904044084	3.284236081834121
Liquiritigenin 4'-[3-Acetylapiosyl-(1->2)-Glucoside]	0.008939	0.1467	2.0323	1.4443	1.1554	0.2084	yes	up	591.177	0.6485	M-H	C28H32O14	0	76.6	5.279	0.6118	4.569	0.7955	5.1203937148870615	4.627717618204947	5.2629889285594205	3.280331867078357	4.546556905627778	4.154758788074553	5.0129175238620975	4.6695479596415135	6.091456743275592	5.6310678409509825	5.705860616186457	5.857743833240403	5.917663646799926	4.206947477837566	4.4507891345564845	4.3554940561554005	5.134853056966996	4.635866479018665	6.5139933987840415	4.470947751941503	5.5226501775830315	5.764283880533379	5.364520355390032	4.907535371266822	5.094050635975304	5.87247043342615	4.777141768096355	4.209847540759827	5.868368748275281	4.053422774423902	3.331923096842622
Swainsonine	0.03733	0.2238	2.0312	1.6851	0.7796	-0.3592	yes	down	174.112	4.0504	M+H	C8H15NO3	91.3	0	3.205	1.0959999999999999	4.111000000000001	1.172	2.954482682803661	4.291226024791917	4.403827871712288	5.734219266326612	4.114254440349179	4.869882831407018	4.074207308830378	4.355035836320257	1.6752155414185212	1.8710249617304369	2.3787459483468605	3.5978637774410127	3.4827797629010098	4.7886841926054124	4.5248254719220915	4.624911862459912	2.553757992276479	1.864900688586972	1.8457168994206663	1.9059264346424407	4.907599606933687	3.5794400572101366	2.5110027414812213	5.287536461333478	3.6395887213986033	3.905874665527739	5.251798361728786	4.827131951590814	1.87528306493771	5.207245257411422	3.845121673925209
D-Galactopyranosyl-(1->3)-D-Galactopyranosyl-(1->3)-L-Arabinose	0.01126	0.1561	2.0251	1.4283	1.2073	0.2717	yes	up	455.141	1.8099	M-H2O-H	C17H30O15	0	80.2	4.45	0.5953	3.6860000000000004	0.9816	3.9677332996541184	4.340456957282487	4.080891656004632	0.9479872263765392	4.036806529544179	4.052932615406167	4.245217299257206	3.910229292190933	4.6726633582758	5.052474038350445	6.089432295383848	4.231932587186405	4.384382627415512	3.692655617540359	4.5894458092407655	3.790657459883594	4.485633231341003	4.917152922805416	4.5037352435156	3.0580762850680583	4.698910746581635	4.7572671156772	4.532515804146971	4.309648779060787	3.8909084043186457	4.047983898820815	3.680064249766797	4.17250115590503	3.9733891697213752	3.0016277860572025	3.5790453286844803
Tuberoside	0.0054399999999999995	0.1303	2.0196	1.4984	0.8648	-0.2095	yes	down	591.389	6.2502	M-H	C34H56O8	0	45	4.626	0.6263	5.349	0.6933	4.882286992589685	5.190250259111759	4.438203731159356	5.787520467998314	5.157696554957504	5.680797212196093	4.333993017739381	5.102694077223148	3.355320451154391	5.225830563485043	4.4139963803276645	3.680147668722413	3.8995500565136463	5.242763585535761	5.143460095402976	5.923072203524067	4.994446346135802	4.32814541669023	4.606263601481294	5.322848848340099	5.175832725912661	3.5684575506408014	5.0792462973057555	5.494763876986536	4.740220307568758	4.384073749185307	6.100854978953014	5.589457418487111	4.833386261154424	6.3762070902865435	5.496452222431247
O-Cresol	0.003013	0.1088	2.0186	1.9469999999999998	1.2547	0.3273	yes	up	153.056	5.1082	M+FA-H	C7H8O	0	49.7	3.237	0.5236	2.58	0.5908	3.006377658988418	3.1491904385258245	2.755520378184076	1.9520734041046441	4.0453520450088325	2.046540885627344	2.972559534839169	4.2609689297392235	2.7700478434916223	3.3663273269123732	2.927802798733232	2.8404415833958683	3.778149124454428	2.812851109499803	2.8438058425278343	1.9409782853039697	3.5224643404646265	4.073314232217673	2.5234103221381377	2.814224402120817	3.5485033439352405	2.728526732486752	3.569436398399372	3.618421871152922	3.2232641814726293	3.7786500122571263	1.9708672977328785	2.829805584388457	3.044802306012418	2.303009032171844	3.1393939830057884
Pro-Leu-Lys	0.01481	0.1671	2.0182	1.4341	1.1653	0.2207	yes	up	357.249	3.3983	M+H	C17H32N4O4	43.8	0	4.927	0.5316	4.228	0.9736	4.966598170806732	4.395049241031227	5.154724306456114	4.358273729809578	4.556423322762537	4.958857081749847	5.473074681776587	5.698265129325253	4.515921618105165	5.071687900636914	5.020103311996691	4.180998873467144	5.1637193158284855	5.368065820225454	3.684187422342473	4.671295998363124	4.9262294723340085	4.6817017581482405	4.8129750970591765	5.9419093433539185	5.0920718341253295	4.8628871848630935	5.406026819019741	3.336892376174649	4.501307913303816	2.860147831335572	4.695690272935764	3.729546549788704	4.7756156692882445	4.25178102647381	3.096234653798996
Asp-Ser-Tyr	0.007456999999999999	0.139	2.013	1.7428	1.2037	0.2675	yes	up	382.124	3.2156	M-H	C16H21N3O8	73.4	0	3.675	0.6195	3.053	0.5272	3.184999477405904	3.5159069470767377	3.0029874891734365	2.647644968544512	3.3218400401668724	3.0189067227774333	3.20122367412347	4.121197530091355	2.5600586364163886	4.394677078701803	4.148759273009008	3.7518054787210637	3.453552174266372	3.1281531434602474	3.3492310835581964	3.418981868790665	3.331089294836432	4.2626428568704835	3.030723123979332	4.78476990574912	3.5727599859795283	4.782971142246672	4.060874119438613	2.831967329123952	2.739781330779933	3.673483094206434	3.0208251585423453	3.4297801745241063	4.23086960784169	3.27848422578947	3.2598461356298616
1-[(5-Amino-5-Carboxypentyl)Amino]-1-Deoxyfructose	0.02081	0.1857	2.0101	1.4555	0.8119	-0.3006	yes	down	273.144	1.7599	M+H-2H2O	C12H24N2O7	0	63.7	3.76	1.1159999999999999	4.631	0.6536	4.385540355909785	4.96662128222112	4.5194356161609495	4.579596451782376	4.068503115295898	4.59669309069641	4.179530791800756	4.310961844341842	0.8952817684232144	4.455690956830456	4.554108385504144	4.546417289705398	3.807508946315528	4.406191141017708	3.221569799162169	4.884213713497549	4.490075037276145	4.2990619010225615	3.5066619177037985	3.1713841899305577	3.5830868582045414	0.9590504260003264	3.5124437386066387	4.858993349420934	4.545405884995275	3.588424082388252	5.014890626346593	5.041995864197273	5.187717297456387	5.0098195142251445	4.6419357796222895
Ganoderiol A	0.001531	0.08405	2.0088	1.4271	0.9026	-0.1478	yes	down	533.384	6.4315	M+Hac-H	C30H50O4	0	47.2	5.922999999999999	0.5242	6.562	0.4431	6.199919433944023	5.955842390001488	5.581655512972247	6.766299839002754	6.413958921998706	6.791334177901268	5.840998235481497	6.357471415587245	4.7083010661207725	5.9936105398983015	5.619815436407712	5.61605615629398	5.723229563895397	6.584687847978945	6.689622928771367	7.0682170288378	6.50462647354761	6.360092182252724	5.7987447286258424	6.113736702843032	6.182315822585987	4.766911794812561	6.1122425176349875	6.5944706894716205	6.196041735492266	6.097019690012803	7.1267020051770436	6.905260624083095	6.060861421033271	7.244422715875351	6.6244305111990425
6-(4-Phenylpiperazin-1-Yl)Hexanoic Acid	0.025810000000000003	0.1968	2.0071	1.482	0.8289	-0.2706	yes	down	275.177	5.9147	M-H	C16H24N2O2	65.3	0	4.032	0.9635	4.864	0.9548	4.229034003850631	4.888329105303181	4.663015723854652	5.8141263931998886	3.9500517693242654	5.850544327513907	4.85407377496008	5.029721683511758	3.2505672551938978	3.976137254835313	2.742342161715054	4.68912215572972	4.754270089619649	5.391206463128319	4.7770397393482575	5.398927873757278	4.173056332432969	2.232975300024659	2.5428913026906086	3.037144605592634	5.7401712001875405	3.215072788889025	3.8625715738983297	5.927028048348008	3.7719261303575897	3.5254138255622847	6.031310617539206	5.870758382093383	3.547798736741476	5.215002818352303	4.369814887963445
6-(Alpha-D-Glucosaminyl)-1D-Myo-Inositol	0.03718	0.2237	2.006	1.5499	0.8494	-0.2354	yes	down	376.104	5.8719	M+Cl	C12H23NO10	0	55.7	4.891	1.268	5.757999999999999	0.6522	5.415873312840608	5.071202014155914	6.825666659543086	6.356488628393407	4.919749264115243	6.607779144753798	5.9603282942858575	6.159334417719388	2.75087590665776	3.290319574547857	3.2050687542288574	5.3113218368474655	5.941729345920709	5.867358346391289	5.006432268730281	5.707194238170674	5.478535096309949	5.649646249299521	2.9797385275135166	3.96598488398319	5.7009414107113585	3.125558701781977	6.169347992522115	5.102977732314801	6.0203554657508525	2.814828418192433	6.1233114203258285	6.238163191114093	4.054025987957917	5.524258106744036	6.4453856920722
Asp-Thr-Lys	0.030760000000000003	0.2087	2.0048	1.5759999999999998	1.2385	0.3086	yes	up	417.199	3.3876	M+CH3OH+Na	C14H26N4O7	64.3	0	4.087	0.8405	3.3	1.082	3.904645047276582	3.1156739003867004	5.277855488040995	3.1695656545886712	4.0135646817990045	5.145598651901636	4.23233877393223	4.003810002480599	4.945564837310727	2.022347643319361	5.234448333242288	4.635388090629196	3.2202100475008537	4.6694002679992215	3.2582247380903056	4.307931491234099	5.209362187370885	4.279523752272897	4.689406846885069	4.2001336607973005	3.389051977022252	3.8381101927569823	4.183287871618103	3.2893118529688863	4.083419435930002	2.54921765077902	4.29179503956109	3.830388604947518	4.793367696840768	4.530622669594568	1.9705764336983351
Ursolic Acid (Cis-3-O-Hydroxycinnamoyl-)	0.0019440000000000002	0.09419	2.0041	1.4403	0.8894	-0.1691	yes	down	583.385	6.2024	M-H2O-H	C39H54O5	0	50.7	5.306	0.5993	5.966	0.3736	5.369651491588812	5.373739548525245	5.5693035045616295	6.294044294085209	5.658652972988636	5.9695194997453935	4.383608063379925	5.623216399574743	3.822064714880232	5.573428730009738	5.386666948674806	4.677984134896732	5.306789424541838	5.890156776381851	5.644496306116711	6.134485855438558	5.890037761310762	5.76432650868172	5.469085906174279	5.840379070047878	5.6352883789998796	4.125657740504615	5.702023811914519	5.7746699168639335	5.661041280081206	5.276419222892455	6.513358876712159	6.198639955684463	5.710348459506101	6.534148484617862	6.157728789692071
Desmethyldeschlorobenzoyl Indomethacin	0.0071400000000000005	0.1372	2.0009	1.4695	0.8567	-0.2232	yes	down	190.051	3.9746	M-H	C10H9NO3	67.9	0	3.9739999999999998	0.5869	4.638999999999999	0.679	3.70521330472544	4.942519440407335	3.7535265194815053	4.997771489434302	5.354260853607168	4.373791340496522	4.0072451041464365	4.4496501566893425	3.441928764355543	3.864629465242004	3.6068829045212287	4.208866632484999	3.923676531981752	4.68181010388304	4.185366745238015	4.611000842748493	4.296431182291947	3.97950104224294	2.9570917412414737	3.623068171693607	4.353012935979161	2.941142370768879	3.906650105050085	5.736257563494531	4.090585994113272	4.17555155278073	5.2665866455914285	4.68127643390117	3.3161576407793896	4.843102464705748	4.933039482471815
Gly Asp Glu	0.0034990000000000004	0.115	2	1.4182	1.1409	0.1902	yes	up	320.108	0.6499	M+H	C11H17N3O8	57.3	0	4.931	0.5084	4.322	0.539	4.301214516986368	4.699952146266654	4.297183603358672	4.813734119209463	5.3086556589801415	3.909826443778596	3.9068080368617375	5.173929882409032	4.436809158916793	5.412712547108455	5.595635382909029	5.313348665655111	4.864286224626978	3.841518344612206	5.018064098095062	3.879017720233677	4.70120861222906	5.382284724446513	4.618486532226684	5.455064950948977	4.633649560952682	5.788488691339881	4.787385320550517	3.8344794005329152	5.0824488988678285	5.007099685652813	3.902350023273068	4.4467510071742815	5.528613526062545	4.231117596249748	3.8614951885871966
Narasin	0.006417	0.1338	1.9975	1.7945	1.1387	0.1874	yes	up	769.487	6.721	M+Na-H2O	C43H72O11	0	50.7	5.829	0.7109	5.119	0.5541	5.574589285940925	6.000128476043925	6.050385195264711	4.701868282521728	5.668965303462628	5.098983708194819	6.175887273700413	5.2405780089303295	5.929754847784302	4.6421016119327625	4.904927966626099	5.699584541516208	5.769228897966922	5.139980650716526	6.146887566219852	4.913247966354961	7.03892021691137	5.143850445771526	5.749892208605683	5.8260202903757525	5.666255674965812	5.675394202374179	7.848374511701055	5.7103947089869775	5.3521866001023835	6.254139640877341	4.084427156785677	5.473753706596774	4.9696658405696965	4.544465761905879	5.38283200114191
A-L-Threo-4-Hex-4-Enopyranuronosyl-D-Galacturonic Acid	0.02487	0.1943	1.9955	1.3981	1.1637	0.2187	yes	up	351.057	0.6218	M-H	C12H16O12	0	77.7	5.715	0.7415	4.9110000000000005	1.155	5.2165116329831545	5.5809551918141365	4.948162438740762	4.966067982019736	4.327613569025972	4.411748312052662	4.381056879816819	5.70545271890637	5.380760397650576	6.29675400640783	6.207333230465715	5.975872908604032	5.738951416954862	4.60409177411307	6.770695071349226	3.4593793366869403	6.468335513947848	6.6685036698352524	5.6867793660284445	4.7310631234946126	6.012409725708912	6.673685949398383	5.804710385024239	5.605591318826591	4.268615033449497	6.32786494737259	4.955007021542161	6.864484508015468	6.245670333217975	3.592124310582872	5.445985276795173
4-Hydroxy-3-[2-(2-Hydroxyphenyl)-2-Oxoethyl]Chromen-2-One	0.003865	0.1164	1.995	1.8526	1.2396	0.3099	yes	up	295.061	5.765	M-H	C17H12O5	41.9	0	3.425	0.6403	2.763	0.43700000000000006	3.867366952455027	3.8000176952264484	4.716257314734499	4.446585428210201	2.5142110799281343	4.340258658350627	3.5856248071222647	3.2979966196898047	3.4539992721184416	3.786090235770339	3.15339141337825	3.2315686755242607	2.3599537500006678	2.9850109480605966	3.32772918394519	2.4292845024305065	2.9382440321295515	4.031195446541933	3.8931181722065498	4.558202839719135	2.8979447313129865	2.706638573932213	2.9587969623015584	2.5647819411657067	3.4848009742860766	3.2579780567855208	2.4593994378352653	2.419717036848716	3.3521314440116985	2.4447719190886366	3.1287243748391838
25-Hydroxyvitamin D3-26,23-Lactol	0.0050490000000000005	0.1275	1.9909999999999999	1.4161	0.8764	-0.1903	yes	down	475.307	6.4208	M+FA-H	C27H42O4	0	44.4	4.6739999999999995	0.5763	5.332999999999999	0.6089	4.541651154059644	5.382926623860214	4.8576536366201015	5.517159728510052	5.430928724057011	5.2307193583557785	5.1084798578775565	4.379371058921906	3.6445594090762494	4.025003641862578	3.8324936215610115	3.969224236480145	4.1046653711820875	4.906521548942759	5.529447443698237	5.811355843704843	4.80449370628535	4.573613576522131	4.472099231385894	5.433162047746139	4.77177287220306	4.962790685326733	4.986575523526925	5.418753398066689	3.9493923308212544	4.678184186962906	5.500050667323452	5.31769589460728	4.503278553439424	5.482673465787658	5.2239107043338375
Senecionine N-Oxide	0.010579999999999999	0.1519	1.9853	1.4468	0.8333	-0.2632	yes	down	393.201	3.1683	M+ACN+H	C18H25NO6	0	51.5	3.843	0.7688	4.612	0.7533	4.753225746687637	5.4734145192376	4.287488946409393	5.042726813839233	3.2456543578501527	5.1300308878464325	4.78106822039994	4.0037080344573965	2.573340059003056	2.77211069960121	3.653334411707684	4.035308679682834	3.962078835626105	5.104345976241404	4.066078342601399	5.266120244567829	4.142481923534927	3.946852150674097	2.7464916732251377	3.935981789083958	4.041442215702387	2.645494415200695	3.949930398538103	4.953859180585932	4.835668532903342	2.6287589262764306	4.923749914657682	5.2847625539153285	4.877779676128334	5.300842182399738	4.470245060515553
Soquinolol	0.01986	0.1824	1.9818	1.5224	0.8085	-0.3066	yes	down	351.192	5.7757	M+FA-H	C17H26N2O3	0	41.2	3.471	0.6789	4.293	1.1840000000000002	3.120045757852825	3.672348976476612	4.229341573447922	5.359306387588791	2.5835973879509804	4.814284014859329	3.74475587990235	3.4696980223409812	2.242543014141425	2.5420433500007222	3.8102552672401035	2.9941799673196696	4.023601828512402	4.516205985776862	4.240100686260694	4.609802344323144	3.833296476945596	2.924214270867715	2.6247868617481145	3.713277504321976	4.752653872010809	3.9563087550782234	3.468154573247252	5.32290475611328	3.3355124732546764	2.9477900213077564	5.708282862024047	4.983560868291482	2.8018782772970052	5.083456620675023	4.80949726324964
5Beta-Cholestane-3Alpha,7Alpha,12Alpha-Triol	0.006157	0.1322	1.9813	1.4552	0.8523	-0.2306	yes	down	465.358	6.4315	M+FA-H	C27H48O3	0	42.1	4.178	0.6098	4.902	0.746	4.831534157009868	3.767885068368666	3.5119327086053627	5.275313318409691	4.979336415761326	5.196466260086955	4.229882809448489	4.572722367050665	3.402670685655799	3.7727595178420623	3.590579114232654	3.480484013444162	3.5806953520723828	5.167501693742938	5.125759793719332	5.674752456024272	4.7003386731758505	4.953915903672193	3.631778991980152	4.456845186200762	4.806802391779505	3.615815465568246	4.375073979368205	5.081814238244039	4.086527905535301	4.368783048734652	5.89549334442011	5.386623097591745	4.396377060713814	5.794474120701535	5.1490978466394886
3-Hydroxy-L-Proline	0.01654	0.1726	1.9812	1.4475	1.1744	0.2319	yes	up	132.065	3.4089	M+H	C5H9NO3	73.7	0	4.836	0.8551	4.118	0.5896	3.9270723340719424	3.907800471792652	5.432223824267979	3.4827201967352344	3.8568028838055786	2.498721072891056	3.962802681918863	6.539858306023812	5.083788227663117	4.984145486307905	5.192130649806798	5.747157775375332	4.182408841260173	5.246080773867831	4.520225262317424	2.5957160781518587	5.213953171168548	5.465002163901771	3.1943342329316784	5.437353260942572	4.265516323293743	5.768790133638272	5.205895605778296	3.4204933210267114	4.924862532432703	3.105887323121088	3.908850964810698	4.904156030882222	4.515305020201273	4.19181301050505	3.83464423121385
Ethyl Maltol	0.00035469999999999995	0.03926	1.9793	1.4231	0.8835	-0.1787	yes	down	185.046	0.7236	M+FA-H	C7H8O3	0	46.1	4.216	0.3729	4.772	0.3731	3.733069295558633	4.593118116111892	4.645279668253632	4.66909280148563	4.59624582650431	5.0503576647215525	4.524241647674867	4.513531902083474	3.747232954168254	4.600018995353457	4.33312312494629	3.9563949199170327	4.228689812968561	4.430511530923893	4.3292685877271495	4.836238450546693	4.3885205267756655	3.816400702906952	3.9750384815799813	3.5501960519595874	4.500314502930299	3.6376672187027936	4.435546439732874	5.039540718165776	4.53026186404536	3.367170598900569	4.87357061996054	4.826066395393759	4.645106085972133	5.041551060370927	4.7726298407560535
2-Hydroxypropyl Starch	0.01899	0.1809	1.9793	1.3588	1.1562	0.2094	yes	up	763.317	5.9125	M+H-H2O	C31H56O22	0	46.3	5.36	0.7752	4.636	0.8144	5.4287130734846025	3.8193376847155016	5.096258474902821	4.279903584421591	4.613447868612706	4.820186469252754	5.428901164015392	5.659900206496036	5.840490657111279	5.207967843425454	5.837954427138129	6.554127077590161	6.0795045832733985	4.918388733908912	4.019052641874588	3.9063741461524333	4.3325944163861765	6.060889927997304	6.308043038495562	5.62512795993649	5.7803048904842225	4.512061375393769	5.6429727044516325	4.686308718835318	4.8443840336056825	4.648792681437564	3.9297066324451606	5.133480607819165	5.677605325142938	3.89939490658798	3.888851470262556
Biotripyrrin-A	0.003546	0.115	1.9774	1.3417	1.1265	0.1718	yes	up	466.197	6.0249	M+H	C25H27N3O6	0	77.6	5.317	0.4682	4.72	0.5720000000000001	5.299476604282028	3.9592597695660494	5.867472542440338	3.974684378574815	4.742841605806948	4.964902769993295	5.330202254822157	5.329546822074568	5.42155737254459	5.8063625542104536	5.573785969144431	5.628106092075383	5.309072037311412	4.3903285545557065	5.020380217978898	4.046299524472812	5.3580456318432566	5.9859088612243845	5.56952940122326	5.6889913422871645	4.833216800807552	5.0366039939899645	5.257774773796495	4.906484812163266	4.418965170430104	5.203559153599033	4.34814880163683	4.185381708879539	5.458509121587925	4.039320044467339	4.028776237503637
3-Dehydroteasterone	0.0002984	0.0362	1.9755	1.4769999999999999	0.9118	-0.1332	yes	down	445.332	6.5807	M-H	C28H46O4	0	73.8	5.778	0.4089	6.337000000000001	0.2923	5.7609791359822635	6.363701072024673	5.374355254152964	6.537448474638878	6.2888554258315565	6.322466683564593	5.757905500877973	5.875326526392162	4.6778237482022025	5.8606801558995425	5.883818209628812	5.1814623380916185	5.732287507579605	6.306113870930518	5.816131845265133	6.629801120290809	6.061197030202161	5.671421249043722	5.955625467480509	6.3245246086923395	5.951365914990367	5.355679146501869	5.898135836403997	6.398253382609817	5.8615901121393215	5.668279271657696	6.5931669409241405	6.723577779783335	6.40509178125892	6.257919551848066	6.430852253638959
Ile Val Glu	0.004286	0.1212	1.9733	1.3314	1.1295	0.1757	yes	up	360.213	3.3183	M+H	C16H29N3O6	79.3	0	5.311	0.345	4.702	0.7439	5.015888499794206	4.7650868609741375	5.239274791002903	4.236154290661888	4.914493543514887	5.039929191580495	6.065462211130941	5.150513544021703	5.850898644855107	5.593774213001447	5.433808489339652	4.917094973087063	5.223484505459283	5.041889712956948	4.8131534158753375	4.6426413363398025	5.5095917706651125	5.5196058916656865	5.421740452710239	5.5539604732224745	5.130965751663691	5.35646504773876	5.431165504587065	3.9281927409807063	5.230706803948246	3.2373769770574805	4.613547262833978	4.613930910963856	5.372997503849408	4.0786828227085055	3.9642442388805454
Meosuc-Ala-Ala-Pro-Val-Pna	0.019530000000000002	0.1823	1.9714	1.5448	0.8186	-0.2887	yes	down	635.272	5.3216	M+FA-H	C27H38N6O9	0	57.4	3.701	0.7345	4.521	1.12	3.492178485029908	4.0724133161529785	4.460280984893248	4.643983229460492	3.692729215686928	3.596546720297482	3.4027380520816464	4.404521954420917	2.3204292086487905	2.6201338973233974	3.3274869708580943	2.9716790856083897	4.778858910304195	4.732753980007897	4.291193877135864	4.662863664706291	4.200360345386536	3.969348477941296	3.301973264333016	3.0709440478448395	4.903596915439903	2.9158613434717036	4.117198912149254	3.706636511339553	3.4279463320051264	3.129083539666498	5.973059596140843	5.371081520333671	2.9017074078652576	5.613312316715606	5.719225763383868
Salicylic Acid	0.003739	0.115	1.9712	1.5009	1.1713	0.2281	yes	up	137.024	5.8826	M-H	C7H6O3	98.7	0	4.588	0.4421	3.917	0.7465	4.412065511475103	4.0484074079277015	4.042744437332794	3.8443636927923936	4.24785248880279	4.142269871562323	5.200652218363037	4.418497545767363	3.9826226157572937	4.7564012530779785	4.623477903086773	4.420415273402158	4.823778889297371	3.2984824593177624	4.753561959069425	3.6442266216906063	4.7173208762678565	5.593867384167861	4.026093358788864	4.259004925545683	5.04154239049191	5.003552632751876	4.791524344626319	4.806785500401701	4.4559371518957365	4.834215601532242	2.5193980371466256	4.589156825007475	3.6924956648524283	3.904741260684596	3.8316404017137295
Ala-Val-His	0.00038369999999999995	0.04104	1.9701	1.8627	0.8437	-0.2452	yes	down	326.18	3.2273	M+H	C14H23N5O4	38.6	0	2.9419999999999997	0.409	3.487	0.29	2.4814074232077394	3.0990418899273435	2.6384056581517568	2.9928737730869384	2.852316028675532	3.0258745047041096	4.053582126579687	3.1176801593021013	3.270236133079788	2.7124525712878693	3.2361166043799536	2.8678551801660435	2.54049974948183	3.4826045866958366	2.8354870357762967	5.107507562397813	3.0246848896993925	3.247776947678864	3.3332922100146853	3.066529612109996	2.2011628332782047	2.6316517688041827	2.6813659787455864	3.6342197569746397	3.2558149066863518	2.7748902536771443	3.604508020804953	3.157424535231129	3.5630572925746127	3.909786634819582	3.0966741834104585
Leu Ile Val	0.01565	0.1707	1.9677	1.3719	1.1814	0.2405	yes	up	344.254	4.8637	M+H	C17H33N3O4	71.7	0	4.546	0.6957	3.8480000000000003	0.8015	4.287762066197237	3.503083986062612	4.3544925870489095	3.097446657872136	4.590419019456973	4.036229924022783	5.658420701752168	4.0650248242832765	4.528006735547078	4.819163912243756	4.917374491265892	3.390348451611852	4.543349006698281	4.599008692915695	3.183512891493438	3.227890846335616	4.768804021955598	3.96614173094744	5.389528135771091	5.311566529419222	4.650576511069672	5.105534270263224	5.3442015800819656	3.4933511476042787	3.9951495573154254	2.9742315769010474	3.3668883051342675	3.0786662166999887	5.061420025635753	3.2209148973890507	3.210376533477437
N-[1-(4-Methoxy-6-Oxopyran-2-Yl)-2-Methylpropyl]Formamide	0.029169999999999998	0.2053	1.9642	1.5304	0.7240000000000001	-0.466	yes	down	284.114	3.6441	M+Hac-H	C11H15NO4	42.5	0	2.287	0.8897	3.159	1.226	2.16331004085671	3.4970603340100737	0.8773421626583887	3.594217552955495	2.1478117500783283	3.401758347759451	1.0143241550153452	3.750546478895597	1.3662096277952869	3.0269259697137367	2.8999871577902443	2.8292718965066515	0.937604176615281	3.487368286164732	1.7448177174020099	4.94346256531523	3.1362180518358937	2.9756081052985963	2.677328532238652	3.072947572894524	1.6469011606772703	2.013986368584604	1.6781352976685706	3.843124559989505	2.7389635261362093	1.108262816368257	3.815440806549276	3.8423358126581	3.2564856059744405	4.08017313501005	3.155031654380683
2-Amino-7-Methoxy-3H-Phenoxazin-3-One	0.02053	0.1848	1.9624	1.97	0.7828	-0.3533	yes	down	243.076	3.9111	M+H	C13H10N2O3	0	48.2	2.937	1.088	3.752	0.4542	3.3672429657194964	3.8357009523963344	3.4529394629346686	3.926047067785469	1.0903902076897136	1.1851360089485374	4.579355484520579	2.7318223098225025	3.1004826635249816	3.4032990750267147	3.165822017507728	1.0079372160529352	2.9899220007881544	4.5914570356592455	1.0564736789343776	4.1500270321139725	2.504120314666024	4.0622423792805975	3.830654402876089	1.1620804220566712	3.653080398550024	3.3708347566082177	3.4390138606848657	4.058188934157014	3.959667388653581	3.1690914695222414	4.001669981806199	2.9144830826750074	3.4933311705020027	3.6188131681912696	3.6581986847502175
Rhodamine 110	0.008085	0.1433	1.9611	1.6907	1.22	0.2868	yes	up	365.071	3.3337	M+Cl	C20H14N2O3	0	49	3.472	0.6181	2.846	0.5599	3.7428457981558254	2.631068309427852	3.551508752652465	3.167042751444422	3.6692194280081623	3.004806559238122	4.3977639981902685	3.3894696653052794	2.3531953212532857	3.9179246539812453	2.7744935635277366	3.8790463155068613	3.5728532544273586	3.850440023064192	4.060604815220208	2.523240186666828	3.5645981637302766	2.4677817003513884	2.4953086743721298	4.0997265897840105	3.9637766058610633	3.754082820814008	3.67503460484456	2.658822200464797	2.408646265864973	2.33082984247892	2.5533762639293003	2.5136656914111164	4.262815450330836	3.0396529211808017	2.5859035836386535
Dihydrocelastryl Diacetate	0.00037200000000000004	0.04047	1.9606	1.5014	0.9286	-0.1069	yes	down	535.31	6.5915	M-H	C33H44O6	64.2	0	6.67	0.2993	7.183	0.4101	6.494759503853518	6.647630283734933	6.575014729168804	6.776897893818703	6.729083027069143	7.687404899980266	6.706882221976205	6.7534880967311075	6.425083370639133	6.4125225001372295	6.152339348870152	6.239909515566522	6.613563490217037	7.364420181274163	7.329943578782053	7.21611948019757	6.936723681717446	6.5239949138626745	7.049472835887997	6.599734108109755	6.479226583079339	7.057165484850688	7.009094585779837	7.227703896353668	6.790190185658291	6.448878159102707	7.149191212967538	7.6043360347553435	6.614073256985612	7.389787207487519	7.7902153006455475
5,7-Megastigmadien-9-Ol Glucoside	0.02329	0.1916	1.9582	1.4218	1.1782	0.2366	yes	up	357.224	0.8956	M+H	C19H32O6	0	48	4.925	0.7237	4.18	1.01	4.96544288301185	5.455843727270057	5.164613959946533	2.8957332512979983	4.923143272197178	4.667163662784034	4.468245100676217	4.888408587436857	2.8618886680121967	5.3052011418768465	6.019313951557463	5.193539730834545	3.8191744159126175	2.9886565040409403	4.717679940741268	3.0261241719469147	5.341073876989022	5.6053178296297945	5.483749890356015	5.615188898553387	4.254527323214693	4.710714834051564	4.785922509428361	3.4919516879215933	5.351308995422767	4.5465625060079535	3.0494380831514163	3.5202580906728382	5.6413430862505525	3.019150685114095	5.365731824490555
Val Val Glu	0.008657	0.1458	1.9561	1.3173	1.1438	0.1939	yes	up	346.197	2.2145	M+H	C15H27N3O6	76.3	0	4.986000000000001	0.2956	4.359	0.9056	4.8601051367022645	4.63378452748729	4.898904260079452	4.174518324330111	4.604911318158568	4.8401533859042285	5.5826765043539135	5.109793202477778	4.78430038135008	5.2940690309711655	5.022644073823941	4.63240243217544	4.950925965080306	4.8683264202318615	4.505257750731512	4.615228888717434	5.199929514856766	5.212740584337807	4.954636491191387	5.5192793310054045	4.86764587510527	4.987144955147422	5.1210298411464725	3.5161556365446915	5.043889336975657	2.747587579388408	4.489039347770464	4.227305223736261	4.945667715292345	3.7692769875869216	2.983599937649264
Succinic Acid	0.02308	0.1914	1.9528	1.3454	1.1159	0.1582	yes	up	117.019	1.3329	M-H	C4H6O4	99.5	0	6.8839999999999995	0.9023	6.169	0.6223	7.383732409520823	6.590740580297747	5.247790240022344	6.024233588767438	6.580802598705664	6.456448318580798	5.190015840820445	5.2997567138435375	7.325082025372796	7.803908825010576	7.654953563338113	7.454982922267709	7.059291617654954	6.547900088579527	6.905651395617558	6.197494302051912	6.355913582049552	7.4021886209440435	7.336145993404692	8.07810536443115	5.942758755428983	7.830777055254709	7.352276140859691	6.50416589973878	6.080063552420597	7.315045791450273	6.110628202598293	6.5988635403299964	7.6332462574866025	5.750629728559612	5.846830368208074
Trans-Cinnamoyl-Beta-D-Glucoside	0.03021	0.2076	1.9484	1.4029	0.7709	-0.3754	yes	down	291.088	3.489	M-H2O-H	C15H18O7	0	44.3	2.705	1.102	3.509	0.6539	3.444534605986985	3.8266844925349472	3.2638094924279413	3.3328595514892787	3.667452227639677	4.191593641552605	3.2877840414762254	2.369185217218564	0.4117712833265553	3.315037233433754	3.5900030896441355	0.4610837858183705	2.981196903707968	3.60757453024556	2.6209107591990044	3.7251907869388847	3.7854832515886003	2.5070049298544648	0.565810350181698	3.2282968559613168	3.3382921479398835	2.107012147383883	2.6177689125514108	3.726999877717921	3.13529335168634	2.5867049391853434	3.486175513219827	3.3540062110164084	3.2855634000288765	4.037021081403696	4.023157947250931
Ethyl 7-[2-(3-Cyanoanilino)-2-Oxoethoxy]-4-Oxo-4H-Chromene-2-Carboxylate	0.0159	0.1713	1.9465	1.4004	0.7695	-0.378	yes	down	437.099	3.3874	M+FA-H	C21H16N2O6	46.7	0	2.494	0.6012	3.241	1.0270000000000001	1.89934576575928	2.642284658490204	2.923962264456664	3.4562962261886176	3.3364832435167435	3.915432007193065	2.5136226638458097	1.9639482410721207	1.7061842977025514	2.0026381527249364	1.8911414352463287	1.7826217515241085	2.449994306399203	3.4220918498302857	1.993155058063356	3.0628099340661947	3.5218361419533726	2.439021228084238	3.7776214499949803	2.7510651044283843	2.928640796882624	2.4430014244214258	2.4269295859212385	4.005786094785512	2.40020813805586	1.769069401798382	3.48708693384208	2.506423813343153	2.773428562715984	5.353884425401972	3.8848379829300193
Asp Phe Val	0.002375	0.10099999999999999	1.9459	1.3412	1.1321	0.179	yes	up	380.181	4.5802	M+H	C18H25N3O6	61	0	4.783	0.2622	4.225	0.6565	4.630027068683736	4.858974547463344	4.4459102361429474	3.946997275967545	4.8340358681087805	4.4985529230627685	5.259897315736177	4.6169110182710735	4.936199235745333	4.802224133295471	5.190680223716785	4.306338250430909	4.8203945741424645	4.774990325241087	4.341826137498332	3.9610482264391678	4.728226879414317	4.950065419767996	5.121821671125498	4.933023385812083	4.550431950613995	4.796605318606474	4.747017391111794	4.603336704903682	4.640363567549146	3.7937522488082522	3.8081551476245235	3.88017639744636	5.159696772969544	3.6367914911247534	3.1464474568040717
Val Thr Asp	0.014980000000000002	0.1675	1.9456	1.3591	1.1621	0.2167	yes	up	334.161	1.1093	M+H	C13H23N3O7	71.7	0	4.8469999999999995	0.4741	4.171	0.9775	3.9917525692900258	3.8839261715802564	4.345173290068661	3.0766432483077164	4.793034655561714	4.3348814882923135	5.195899966679097	4.8217898056202335	5.389186630175217	5.223937344727796	5.477942202478664	5.038611113635927	4.908837663952216	4.387123549336576	4.447359231240349	4.068944897089355	5.095877479821544	5.731364266074207	4.9612583354532696	4.718879977030394	4.5618024919676525	4.799809921680699	4.711077784561006	4.5032161835661935	5.027664912886648	3.518760495211698	3.9840914696799414	4.286193835533951	5.181527396243137	2.899398570646772	2.70528676602495
Hymenin	0.03669	0.223	1.9402	1.541	0.7591	-0.3977	yes	down	321.133	5.311	M+Hac-H	C15H18O4	0	58.5	2.467	0.8842	3.25	1.095	1.8642623575539483	3.342719768429641	3.031758293930572	3.246906342536789	4.075525044607781	3.371227073890385	2.140456151861617	2.9872707255703075	0.8674400435903681	2.46487979891482	3.5260343513236516	1.7655553235372052	1.4150137165547232	3.06123345799722	1.8433549563452267	3.156933246692926	2.9172580120388174	2.79883	2.736426589958745	3.421053727148797	2.911112610504933	1.1268064226430603	1.6293503617058	3.291991047487932	2.7685953040690343	3.3904893817452906	3.4087965429522282	2.4676143573844778	2.2741516994040736	4.084824440613397	3.0189944106715627
(3Z)-Octadeca-3,17-Dien-12,14-Diyne-1,2,16-Triol	0.006887000000000001	0.1358	1.9395	1.4980000000000002	0.8588	-0.2196	yes	down	345.202	1.7973	M+CH3OH+Na	C18H26O3	37.9	0	4.216	0.6933	4.909	0.5594	4.082895937374478	5.29693152283441	4.347728975435664	4.971605234961031	4.309253782127544	5.371750873204831	4.645704817260086	4.9001846434791965	3.8762404332887086	4.8674452402004995	4.512171784349509	4.371566525280587	4.387401193677893	4.698662061310727	3.845897436487628	4.972843863825979	4.037662842587048	4.23022921017924	2.6810109349434814	5.448543892655072	3.2960198466241266	3.2124468185840405	3.759331207850408	4.423691349948305	4.96275356959357	3.1772987027533635	5.003089248618724	5.179057366159264	5.261201165076829	5.3295249726429645	4.812329210713108
Carbazole	0.005745	0.1306	1.9363	1.4256	0.8362	-0.258	yes	down	185.107	4.3125	M+NH4	C12H9N	75.6	0	3.365	0.5626	4.024	0.6545	3.5768106155377373	3.720144869070556	4.153045757946762	2.8233647293826745	2.5232253297108818	4.6762054646349345	3.3250381285322863	4.1382154938277305	3.63097065257276	3.659157284341148	3.7748930918843633	2.465762117286051	4.049024937930264	3.396043961309904	2.519097761388854	4.079728046328756	3.866518168042897	3.217779463786912	2.9928384474668963	3.3885884100333183	3.3608745371913984	2.471564564625687	3.1013625237719253	3.671108180155517	3.9955356714583545	2.3104538837080897	4.1609150126707455	3.978216627957633	3.513435333811472	4.765244017510391	3.9436782351944304
Osmundalactone	0.003899	0.1164	1.9341	1.3708	0.8370000000000001	-0.2567	yes	down	170.081	3.2273	M+ACN+H	C6H8O3	0	55.8	3.096	0.5536	3.699	0.4659	3.5350550105386667	3.604491631731056	3.592754028852084	3.8688283211386234	3.5711158413701427	3.901838229882197	2.3518408826248627	3.621750850213358	2.220914600751041	2.4191504468102694	2.397619371657981	2.392376759389492	3.453100644420841	3.826022685136007	3.3782854664289235	4.416608628615947	3.7971485770620186	3.3828787563723086	2.4590279954891696	3.4865769350849654	3.4215646576360856	2.9164028195372005	2.814724728965456	4.183300617975322	3.365922004149717	2.873352711217875	4.232458201812858	3.8982291231910895	2.7776667062703293	4.031396904233063	3.894029521776607
Glaudine	0.01454	0.1659	1.9324	1.3751	1.1944	0.2563	yes	up	398.164	5.9147	M-H	C22H25NO6	0	44.1	4.552	0.5767	3.8110000000000004	1.0170000000000001	3.1022863739646955	4.603062399674563	4.892840978625214	3.2258095452530164	4.423562734238699	1.9481484378250853	3.9816303803366297	4.581452623234008	4.188048576175159	4.8293487532639885	5.199198868703676	4.765948473090009	4.008192898875321	2.355469493257619	3.856831245295489	3.6091038319999775	5.414856796906353	4.59287673526626	4.668410510767774	5.636874606408735	4.562645718106473	4.715310769636888	4.467302752288263	3.512758981546023	4.469437336198706	4.506210532696174	1.6429937725513537	3.2284963977254915	5.001969379009701	3.449264724690934	3.643644460568919
2Beta-Hydroxytestosterone	0.00022050000000000002	0.031160000000000004	1.9312	1.7335	1.0872	0.1206	yes	up	305.208	6.1792	M+H	C19H28O3	0	53.4	5.997000000000001	0.3605	5.516	0.1974	6.404529275921828	5.715883648911692	6.7408237443221966	5.484244069445188	5.639613884086621	5.670357202075072	5.726645133701787	6.049479874073992	5.4908167195723045	5.687466659794057	6.337104706620077	6.500562186460602	6.140292745983614	5.533992859008807	6.075638813152749	5.390613218431107	5.7588688690124865	6.143401722872246	5.482771359880745	5.842487875689446	6.320494030079359	5.704281588486488	6.175743445336403	5.692609512584723	5.525796667235169	5.364810822411592	5.190575730022843	5.693933612432338	5.661056964227643	5.328462618058037	5.3397282798236905
Sinapic Acid 4-O-Sulfate	0.01056	0.1519	1.9293	1.8315	0.8554	-0.2254	yes	down	303.017	3.4729	M-H	C11H12O8S	0	46.9	3.897	0.5609	4.556	0.7819	3.3095926453412927	3.8549973185445103	4.466291112529903	4.181152327964481	4.113232897182932	3.971357097884736	4.2902284737481455	4.214583171598903	4.150248519331996	4.63607677431484	2.5773843159470515	3.344102912856984	3.6654824274983513	3.725235436340695	3.6946039791118266	3.866584327797124	3.88204950025651	2.8798776123410748	4.069201368048873	3.9525331107315367	4.343015687231596	4.7168715487587765	3.891080816695473	4.687756560146932	3.7067557718591764	4.260090829998417	4.623008308190307	4.4269222575817615	4.8929527165632996	4.2221490199124965	4.771542952285115
Serylarginine	0.006809	0.1358	1.9292	1.4012	0.8515	-0.2319	yes	down	261.144	0.6499	M+	C9H19N5O4	0	42.6	3.951	0.7622	4.64	0.3647	4.329547412873998	5.19444529465619	4.634593215493631	4.761299866676838	4.883944573973049	4.642104748528012	3.9039862814591655	4.129130493405336	2.7232188595374818	2.9221141464985463	4.315332344339712	4.000349442441271	3.900376774714723	4.888601268205095	2.8430385327141585	5.378609130580001	4.037632506421411	2.9159132108219863	4.117864762384522	4.488235508313072	4.143473713561867	2.7954251734188604	4.785244825234162	4.7149818730044055	4.494232214002087	3.9033942501881422	5.060356544031427	4.8600884396998785	4.789623212655791	5.009938187268743	4.568591948566853
Glutaminylserine	0.04455	0.2405	1.9276	1.5459	0.8353	-0.2596	yes	down	234.11	5.2056	M+H	C8H15N3O5	0	42.5	4.235	1.2670000000000001	5.07	0.6648	4.769504746157252	5.154449845038919	5.5207909455038475	5.938331131423791	4.666360349741492	5.809282931697066	5.1077430511730295	5.391112077552833	1.524770438838854	3.731563909454709	1.6979768460325642	4.158617680291083	4.791535739166591	5.492581693509799	5.305334524780355	5.021281424966109	4.545359904715448	4.235070435261822	3.6349786784558975	1.7538793755530615	5.44046502617938	4.284098113337584	4.744486209900863	5.738413281854433	4.696016418619925	4.348022788585811	5.448523859040956	5.364550761056215	3.6018403240882337	5.754359726764935	5.037352552093007
(E)-2-(3-(Naphthalen-2-Yl)But-2-Enamido)Benzoic Acid	0.002525	0.1037	1.9268	1.3695	0.8440000000000001	-0.2447	yes	down	332.127	3.9487	M+H	C21H17NO3	0	47.2	3.279	0.4775	3.885	0.5284	3.2335346298472434	3.6836807782799528	3.8001746691604	3.68622590858893	3.7219797441251554	2.770486079505616	3.151462765802362	2.7555826930534346	2.5756677126112373	3.5654428062142447	4.068159625820024	2.642013971716536	3.59140282199718	4.0145074181169305	3.2579355456748966	3.9839634599290736	3.0036273121054453	3.9809510079936254	2.7488213709917764	2.9207695263673825	3.361186231678945	2.6478230204571607	3.5866204065581755	4.212352187263932	3.564494256653752	2.742269839393673	4.226468981507572	3.135526796985228	3.3024367207832994	4.439828795917608	4.5577969234622415
Alkaloid Aqc2	0.013619999999999998	0.1633	1.9223	1.4072	0.8813	-0.1823	yes	down	327.168	6.0142	M+H	C19H22N2O3	0	53.8	5.263999999999999	0.8005	5.973	0.6045	5.520959102435013	5.561941849256579	4.84913276259733	6.566235947336186	5.58264764053018	6.069480458022162	6.180054775797376	5.9124702157593765	4.644685376157222	4.1752436882872095	3.5428466773900538	5.868273637109593	5.498596012010448	6.63615362888904	5.854319854151013	6.067353904184282	5.804147806344247	5.33796873956991	4.138034196983817	4.411785296262322	6.754592275084143	5.283590599991362	5.085491298973539	6.59721647422469	5.484916544377064	5.24020407936983	6.32442133150676	6.402498305983287	5.218760738706812	6.144263212346816	6.61622957663708
Serylhistidine	0.01929	0.182	1.9211	1.3495	0.8209	-0.2847	yes	down	277.069	4.7227	M+Cl	C9H14N4O4	0	58.7	3.42	0.7623	4.166	0.8997	3.184018573630208	4.063543742142159	4.100349238765835	3.7877151333073	3.6867099733063298	4.253855717661192	3.6072328122436517	3.88733538354623	1.9804750974206595	3.5170196323060887	3.964129441205969	3.5741295588529582	2.1570268058834032	3.7191897749245264	4.586621652484923	4.001037287659843	3.9527076296708015	3.252589740486717	4.396476176845576	2.5489832793980627	2.8627376531006496	2.1919206501779014	3.4567765292586854	3.7891493526700697	3.209142137848478	2.277185455153324	4.110312245065746	4.3594955352316935	4.341169235036857	4.440847747343084	6.434727229040593
Gamma-Glutamyl-S-Methylcysteine	0.007156999999999999	0.1372	1.9201	1.4186	0.8527	-0.2299	yes	down	229.064	4.2161	M+H-2H2O	C9H16N2O5S	0	59.9	3.803	0.5869	4.46	0.6606	3.8947048003799516	4.2073683576169625	4.282231345992263	4.481264402798709	4.703517537283039	4.628483930476193	3.8173337306070336	3.9775187143256185	3.188980888930602	4.198906538427062	2.721198051470696	3.3863690289851007	4.426913618130593	4.3536574049091605	4.456958527658896	4.543127035076906	4.1430439552408584	3.731528344142644	3.3758756906713825	3.5043675574654825	3.783376372634816	2.4497866030025413	4.001572233699313	4.745416532004994	4.2349469463870335	3.038684039468423	5.125647148975363	4.228699590711502	3.8080188988735086	5.162053014703279	4.7362163609069325
Zanamivir	0.02982	0.2067	1.9194	1.3155	1.2318	0.3008	yes	up	333.144	5.6384	M+H	C12H20N4O7	0	76.7	3.9530000000000003	0.7637	3.2089999999999996	1.0490000000000002	3.9257013386292527	2.970098554681982	3.89196344148035	3.2391714694272884	3.3030266708121725	4.2397309983267215	4.158240366988399	3.464708048527305	4.330451703371994	3.9463812134569993	4.183070657497561	5.151289091984534	4.881034726811204	3.860972893644675	4.190588831787903	1.7970766617709448	3.2474500043314234	4.607008016878156	4.163101623179806	4.258443206003233	4.480556739831326	1.7452816676153815	4.199701873037989	3.4008404971244066	2.4553675601117617	1.5486820470253242	1.8200493040490002	3.5661540620645185	4.217856439539188	1.7902088090949666	1.7798370188764832
Armillatin	0.01237	0.1589	1.9113	1.5169	0.8726	-0.1967	yes	down	611.427	6.4763	M+H	C38H58O6	0	60.6	4.944	0.6595	5.666	0.8433	5.053538333012732	5.28353084391608	4.826479221816668	6.217747265612366	5.308526545547172	6.405427359026098	4.678140806736832	5.706965954713203	3.89462668824112	4.577971421157397	4.692565030232439	4.23531907866505	4.151841398358002	6.462361471325184	5.626401245905218	6.393291646354655	6.2362073661542405	5.466346407307707	4.2767033656930415	5.712073978480908	5.0284826602778345	3.9669505505933502	5.205259712400127	5.547139199499849	4.954679770845348	4.489067665476493	6.644328072760584	5.780944738108709	5.136197534063461	7.193145690406164	6.0303278996935
Asp Ile Phe	0.03429	0.218	1.9074	1.4239	1.203	0.2666	yes	up	394.197	5.5635	M+H	C19H27N3O6	66.3	0	4.498	0.5879	3.739	1.3019999999999998	3.7685145583934654	4.2932233017531285	3.747898538337437	1.5034228401148275	4.661322267653465	1.6605208220232746	4.234982221664041	3.358257766930032	5.164210585968929	4.8867461052338905	5.304157628554084	4.7070778353119564	4.5782440541347125	3.9212063448429286	4.385680632208012	3.363478218470496	4.581194700042506	5.065816782968398	5.400284727036623	4.329226254644779	3.5296810092704587	5.018385738570538	4.446584679618751	4.249321502038539	4.637234632075876	4.033989615829891	1.6532082471845224	1.4852292896967323	5.458788217441491	3.9104812226004375	2.1820217819935155
3-Benzyl-2-(2-Hydroxyphenyl)-1,3-Thiazolidin-4-One	0.04287	0.2371	1.9045	1.3957	1.1634	0.2183	yes	up	286.089	1.2588	M+H	C16H15NO2S	42.4	0	5.1339999999999995	0.951	4.413	0.8769	6.348682879982473	3.5010956453856266	3.9902975487131163	4.147222271473955	2.8320988576398607	6.1825099640334775	6.192041807088591	4.078530486821622	5.713788849901247	5.921226615189892	4.9513476830536165	4.871233296361962	5.551296657191602	5.5115348137552855	4.708318368539811	4.848850312911366	4.938360618638102	5.522722100606281	5.6447321018431245	5.8747381976697675	5.354505118702559	5.69448064775707	5.8558912708958974	3.8257083164908905	4.483771837165836	4.001290819584384	4.662831149567758	3.7433896388520913	5.84038704327482	3.996797646275196	4.1538365422322014
Fisetin	0.01569	0.1707	1.9028	1.9476	1.2534	0.3258	yes	up	345.061	5.5621	M+Hac-H	C15H10O6	43.9	0	3.438	0.8641	2.7430000000000003	0.4444	2.6465934509797084	4.60462683139675	4.661952084513059	3.2546523437312627	2.528548153515524	2.9306993482868533	2.534177952827249	2.794884240055755	2.1876768767835486	3.4924198334870287	4.529752195468292	3.4962159733661107	4.426405686353085	2.51850718889268	3.9753317665737455	2.4436122251733705	2.461629063034733	4.629048510042372	3.9952479551805262	3.105632596031236	3.4188017475807637	2.3997932901324917	3.4263126280775023	2.5791237736398	2.329097635751331	2.2513483256206768	2.5483779795683668	2.4340435869280173	2.5553206612290777	2.45910148617065	2.9445535491449664
Pa(Pgf1Alpha/2:0)	0.030119999999999997	0.2075	1.8979	1.3504	0.8436	-0.2454	yes	down	551.268	5.9948	M-H	C25H45O11P	0	53.1	4.023	0.9329999999999999	4.769	0.8059	5.091824846207745	4.7307606346946525	5.095247241737958	3.976014265295311	3.6573608137812927	4.5454147348482685	4.315215025536938	4.0911599612622815	3.629943789545132	4.431714790452263	3.830465211722045	3.700380039688433	2.5167212676497206	5.846713331325788	5.1098290989806125	5.266964585409662	5.236647677821562	4.737865229992316	2.5676708620197144	4.732802162299964	2.6421363349501594	2.551747548039748	3.775461132815877	5.609544687118789	3.2531403543836026	5.020954221786738	4.810385562806113	5.313549390999134	4.202668760419604	3.7247212140593513	5.626532183065591
1-(3-Pyridinyl)-1,4-Butanediol	0.043789999999999996	0.2387	1.8964	1.3842	0.7916	-0.3371	yes	down	379.187	5.7757	2M+FA-H	C9H13NO2	0	68.4	3.1039999999999996	1.235	3.9210000000000003	0.6451	3.8041229991366974	4.064372151161902	4.064909136486982	3.5055552810356985	3.7676594638301335	3.8930466356829334	0.6785273479507467	3.2673928325626163	0.4847793459607525	3.497424677686227	2.9832301160020807	3.4325490260321314	4.6518670892126535	3.5922420981814334	3.9770138291410153	3.681689068569188	3.5291871116566265	0.6300296983589484	2.7004556896270047	3.3671699852700177	3.0014821071225755	2.6526348606653825	4.421991854338624	4.5477412550603376	3.236173919357767	2.8048494099035395	4.493156073214835	3.625322091560112	3.222531973796188	4.367660528505805	3.69918509418645
2,5-Anhydro-6-(Benzoylamino)-4,6-Dideoxy-4-(4-Phenyl-1-Piperazinyl)-D-Galactitol	0.0067	0.1354	1.8936	1.6695	1.1437	0.1937	yes	up	466.233	5.7024	M+CH3OH+Na	C23H29N3O4	37.2	0	4.912	0.5882	4.295	0.5471	4.827529984629948	4.761816232089453	4.844772439143132	4.046047436552711	5.044329088036953	4.584261586968734	4.610303108562618	4.3551031892734535	5.469521348452712	5.4699626771225285	5.89367740492678	4.672974133988291	5.334471582299559	4.330944289291051	4.608825409924548	3.3710921645644225	4.501886479451039	6.004686527562188	5.2911833125387915	4.986652316926847	4.601360175383781	3.44208808865996	4.6074085232393305	4.9263474419475966	4.494324081990115	5.041665067002941	4.202495708782269	4.590439886930199	4.567019538782809	3.868849295135784	3.2313184611300456
17-Aag	0.0245	0.1934	1.8927	1.3902	0.8391	-0.253	yes	down	627.338	5.7985	M+ACN+H	C31H43N3O8	0	88.1	4.137	0.9095	4.93	0.8985	3.5160210032733197	2.8542630882965137	4.899767425139807	5.923435613506278	4.137176020863129	6.028768627635103	3.9038913950834657	5.081468786916218	3.3790973410236167	4.775442726999582	4.287446187144783	3.4583553172659482	2.7877756607717763	5.672145090288571	4.465107298654972	5.106399042989543	3.5464539933663284	4.54556899152652	5.846177910493183	5.021513021917569	5.515767431507888	2.84923	3.7397126370357965	5.81597051188848	3.5374686390622747	2.6877325856307714	5.863297682458238	5.125275414442254	4.41932033712647	5.568931974366207	5.266085894974744
Ile-Val-Tyr	0.007916	0.1428	1.8908	1.3096	1.1506	0.2024	yes	up	394.233	4.2698	M+H	C20H31N3O5	63.5	0	4.591	0.5016	3.99	0.6719	3.966279627203623	4.228163448278922	4.334334531110766	3.4394641902498377	4.786536589643752	4.8315123066306365	5.842426051475035	3.739475814147365	4.6408557930191625	4.7049621815890506	4.663282600330459	3.9567669468654367	4.575771501517592	4.540808617359211	4.113575966986368	3.5721175045646225	4.8478480972692335	4.498102678095855	5.005197675106476	5.079622727973126	4.235531221784325	5.001833018978145	5.016246255645321	4.025072180586649	4.2369611031875705	3.795301337584598	3.9327480308079017	3.0413396247161337	4.952791462555386	3.183579214747168	3.4508525867150603
Leu-Val-Pro	0.01142	0.1561	1.8899	1.3151	1.1435	0.1934	yes	up	326.209	4.1669	M-H	C16H29N3O4	72.2	0	4.79	0.4462	4.189	0.7972	4.335722003049576	4.18103412558707	5.028843744351142	3.5657517091068143	4.480769913352545	5.050394682506406	5.651894884111347	5.199842724543639	4.650858634238139	4.669955650828081	4.823632836541692	4.333877571140577	5.020624054274335	5.168259397151685	3.917788581954798	4.5885668256370895	4.877235299989442	4.484564869395065	4.634101538442655	5.458848145934163	5.068367882073924	4.948539448635676	5.248997063162267	4.086857627102703	4.345694441292342	3.265433348173759	4.7467043344985065	4.104526050372262	4.661463416244182	2.8825934048134445	3.6788051143950917
Phe Asp Ala Glu	0.03151	0.2112	1.8868	2.0161	0.8805	-0.1836	yes	down	481.189	3.1416	M+H	C21H28N4O9	47.8	0	5.157	0.8015	5.857	0.8991	4.933744438792137	6.609106986250037	5.694759393296738	6.235206854911403	4.211925266568897	4.162158020728092	4.983722322940709	5.510975359547368	5.5085061776896165	5.800518496058952	5.315402538467722	5.885291397288121	5.28720649434261	5.20433043980103	3.5100251343948097	4.700483025826104	5.370611171815017	5.206967369904011	5.28674192823431	4.156285668370979	4.761443854404483	6.192202413509812	3.760244576587765	5.419427328573551	6.8992916849915815	4.186112388091128	6.0902446161529875	6.357486414422634	4.249399122256542	4.331806106423453	5.640350159160152
(3Beta,6Alpha,19Alpha)-3,6,19-Trihydroxy-12-Ursen-28-Oic Acid	0.003038	0.1088	1.8848	1.3467	0.9025	-0.1481	yes	down	487.342	6.4315	M-H	C30H48O5	64.2	0	5.486000000000001	0.5369	6.079	0.4256	5.681828429826625	5.501749267454663	5.261937750747303	6.339628992590712	6.127994604582871	6.416174341821615	5.632648243796908	5.9423072222303785	4.73158720372964	5.208451836906756	5.245638357727548	5.0651667974841255	5.146036225787544	6.139393101383496	6.3457459435523615	6.6885883451720884	5.920740265891893	5.867199834477294	5.459484323985731	5.657777576794512	5.8409453279821095	3.9959232647258087	5.592885123246374	6.147686108894489	5.694244864614871	5.564919314467375	6.503593361595407	6.4601328421970186	5.617295123337367	6.609070068769793	6.09442995959996
Azukisaponin Iii	0.03526	0.2201	1.8844	1.531	0.8603	-0.2171	yes	down	815.414	3.9217	M+Na-H2O	C42H66O15	0	57	4.175	0.9138	4.853	0.6791	3.985082705987189	5.3986654441594935	2.77047255930478	2.6595767297370685	5.432402101332072	4.362237268364528	3.4199354954615484	2.8057222438466107	4.196345026696652	4.43400251133496	4.758370641004258	4.973604151732099	4.7140636153722815	5.180121475443851	4.951850601635325	3.5916150083994847	4.9136526627427095	4.043363947225816	5.014773473434428	2.859891574765834	4.440278971068612	3.4266651267892105	2.785398671355076	5.2380815265229534	4.9557087835973865	4.466866299563723	4.909721475683481	4.316834919564721	3.5104421384298976	5.537548112837532	4.015966739032892
Luteolin 7-Galactoside	0.03688	0.2235	1.8803	2.0881	1.2688	0.3435	yes	up	447.093	5.3216	M-H	C21H20O11	93.2	0	3.389	0.9437	2.6710000000000003	0.7951	2.5770868645405165	2.976809644513265	6.063094040306193	3.6440709248009013	2.3262750470241818	4.540990090754418	2.6904468472166214	2.9041922179752966	2.8396293578207468	3.846382537781873	4.0845480284262425	3.010506406051194	2.967924296292495	1.763988418071753	4.218442621800423	1.6922858549809128	3.4429315472022246	2.329405346210601	2.5903323475736024	4.845428530943269	3.422314231042052	3.3144207486222017	3.9392398028773683	1.8258408640037915	1.5799631059925554	1.7267940440142098	3.1245455046959023	1.6828794320773062	3.2658588343491632	3.1495972062801223	2.5685307956507466
Beta-Farnesene	0.01112	0.1551	1.8751	1.2782	1.1618	0.2163	yes	up	227.175	4.4251	M+Na	C15H24	40.8	0	4.223	0.5206	3.635	0.6848	3.7859012954929385	3.903846744019937	4.27398796642263	2.8540188501970176	3.8937850216867127	4.3453638647848924	5.206149435876635	4.648866829027697	3.977367900805672	4.3651843445973775	4.43107531981499	3.1712326994263527	4.432987431806165	4.538635619922059	3.157377130883216	2.9843953153118186	4.194612612495988	3.93355483111972	4.431371498110164	4.88696876402628	4.359698192146601	4.4250083996908165	4.759322870060275	3.142909226191612	3.6776315806557567	3.0462927730509715	3.77840005738346	3.1233860009625483	4.361173283833184	2.9774224966839244	2.9668889579978104
Castasterone	0.0022600000000000003	0.09982	1.8732	1.3293	0.903	-0.1473	yes	down	463.343	6.5807	M-H	C28H48O5	0	45.9	5.2010000000000005	0.4982	5.76	0.3684	5.36243958732049	5.566369493209944	5.3631345012263365	5.811856228395348	5.94278721210036	5.8450022305210325	5.284554761702856	5.192876848864726	4.636023248162286	5.442316472368843	5.367635067027145	4.669758037886592	4.75518089414289	5.728294501096062	5.288905660225159	5.979068690409932	5.555689660518434	5.5492498497132186	4.8766945980119925	5.528705151766371	5.428986721591016	3.682691951622246	5.315674294543075	6.022935591679167	5.570066926644037	5.399757162732857	6.373245322720295	5.81031154531858	5.383782721043963	5.943946215241077	5.881935417728133
N-(2-Hydroxyphenyl)Acetamide Glucuronide	0.02663	0.1988	1.8719	1.6364	0.8318	-0.2658	yes	down	310.054	3.7402	M-H2O-H	C13H15NO9	0	51.4	3.431	0.5112	4.125	1.1320000000000001	2.8446566954159724	3.9824975566705727	2.7578157394520932	2.9167018071994977	4.022336269890355	3.2656203378628486	4.329671226207768	3.2482802569854274	3.8725850466601264	4.195329301435612	3.3328844529675603	2.7264139865892725	2.8264868375212	2.9603120019175315	3.230013549173422	3.0538098478680844	3.1957769961696654	2.9838254047427544	4.06013978843132	3.4209991451958985	3.5717456180270766	3.384516153509524	3.2119595497879816	3.0412804276888803	3.573929617415892	2.9850802867173174	3.379124317324784	2.8959020011015504	4.080015620640721	4.605985395310098	6.190231073847455
N-Acetyl Mesalazine	0.013730000000000001	0.16399999999999998	1.8643	1.8131	1.2472	0.3186	yes	up	194.046	4.4127	M-H	C9H9NO4	64.8	0	3.29	0.7578	2.638	0.5088	3.8157091651619295	3.38194933898042	2.8791416350739296	2.344921610945582	2.0492679453734435	2.0705138128237053	3.0226926465475845	3.345073808821469	1.7114839532457196	4.327833171134747	3.6837859566271813	2.9999417253762077	3.1729884797477617	2.7009097774418698	2.8356770000668123	1.9648930326180207	4.488548416323279	3.627929779890252	3.683438470677913	2.0321793491582	3.8965930036786887	4.0087253572763455	3.5518574113431822	2.5978566742206497	2.0939133485393446	1.7908144923630287	2.973638096908907	3.9052996679403056	2.301315769449768	2.813964990717256	2.027097068737959
Canin	0.00599	0.1306	1.8632	1.4164	0.8251	-0.2773	yes	down	277.108	5.6744	M-H	C15H18O5	0	61	3.095	0.5717	3.7510000000000003	0.6446	2.800194215525745	3.3169680898172413	3.9081312177369503	3.693728202829616	3.4436433399651962	4.166654583179041	2.4257079935574835	2.829686084833843	2.12145687959527	3.087832776200348	2.4819543404884463	2.9784790597086626	3.885573060037984	3.9009638576125782	3.5914994831938998	3.2390697809325264	3.0945886285668087	3.522043751802076	2.349287217710833	3.7553706020509128	3.080505796325889	2.333392658148822	3.789654382724645	4.014134375803595	3.158123361134685	2.5647992585199253	3.6092279236916713	3.4683133136410333	4.256002110141477	3.9884601818957854	3.7463637374646894
Avenestergenin A1	0.03458	0.2187	1.8614	1.4307	0.8615	-0.2151	yes	down	658.378	5.6367	M+Na-2H	C38H55NO7	0	79.4	5.062	1.0659999999999998	5.876	0.8657	5.598632606038157	5.482813151358728	3.020879606057017	5.861824816327123	5.1687458412565634	6.604388417550544	5.566972989809598	5.860280081686168	3.9448580964831534	5.982147696286305	5.8266195659941245	2.9894519668990105	4.883222737599941	5.996174126879003	3.2026019068008784	6.150374588195219	5.265961797751128	5.12389379584754	4.390156390647775	6.294843086600809	6.088904693965647	5.278605144640747	6.216454241884829	6.546398980017222	6.101020943082948	2.97568301133189	7.093436575541923	6.1203632031085	4.587637325779725	6.31117449481656	6.2978173945648495
12B-Hydroxy-5B-Cholanoic Acid	0.00251	0.1033	1.8605	1.3429	0.9	-0.152	yes	down	435.311	6.4315	M+Hac-H	C24H40O3	0	63.9	5.274	0.5249	5.86	0.3949	5.6258316720779415	4.84264091260088	4.948752235185045	6.0758632015223935	5.69092635622208	6.0527823654760935	5.388449525789548	5.774911267283317	4.2458882759017875	4.981135976723842	5.140636622401732	4.971285874663912	5.064202689182409	5.805896193308926	6.2370768374160175	6.302135346539122	5.786553032988232	5.857210725852162	5.244071364596851	5.3948736360541645	5.460772992200524	4.1704998797451065	5.3830911657515506	5.870411091784631	5.545231287147782	5.117519949442491	6.3551275060947825	6.2485359356560055	5.548313614295008	6.299216758717858	5.836873950240473
Sulfuretin	0.02275	0.1906	1.8603	1.2690000000000001	1.1781	0.2364	yes	up	269.045	5.3057	M-H	C15H10O5	66.6	0	4.406000000000001	0.6444	3.74	0.898	4.3925601045880205	3.5677940924187115	4.130748521004214	3.8763329735188288	3.003911837266937	5.345098784417943	5.776512288368133	4.704743848941169	4.200531552766732	5.193425695566625	4.5807013941978285	3.5267552793346435	4.872804299078413	2.013109824506461	4.377685946062658	4.5725336673250885	5.041918588948064	4.166432973509954	4.190863517781076	3.913934538028701	4.579233308791498	4.928500280506746	4.565626504871119	3.8446383483399433	4.099475522860918	3.8401724253126	3.5714050516380187	2.068717839631798	4.494326086641324	3.659085176282301	2.1405902834247823
Quinaprilat	0.008653000000000001	0.1458	1.8598	1.3567	0.8209	-0.2847	yes	down	469.194	3.339	M+Hac-H	C23H26N2O5	0	56	3.0439999999999996	0.5175	3.708	0.7994	2.395939249142053	3.3505626710429457	2.5734655023640243	3.75669508102206	3.3534717402935827	3.7770923710205335	3.0890871018106854	3.0887220544003187	2.2006563594171835	3.1870031657539664	2.4411334798794044	2.278048684763803	2.895453229642704	3.378540711808152	3.728016034223763	4.203991612369618	2.4746476303564227	3.822128297674781	3.2754120429879987	3.4809415380743807	3.268477895384056	3.1313843578453864	3.8065528109325193	4.092763880417482	2.342100338222187	2.2643392013849293	4.850380403430001	2.9248350716342104	3.182088970665016	4.363344398341939	3.53243966515319
Ile-Asp-Asp	0.004357	0.1218	1.8547	1.2431	1.1195	0.1628	yes	up	362.156	1.7599	M+H	C14H23N3O8	56	0	4.976	0.3019	4.445	0.6491	5.098184424643697	4.953986240173797	4.280267766948005	4.796621088625226	5.0678949460169225	4.490033636410443	4.828072515502363	4.657968537135408	4.704456234238782	5.139212734422983	5.425806199055447	5.116108240387877	5.0730871345363635	4.3870858673805015	4.7153708980794224	4.4432751218678455	4.786405754227246	5.406508035063301	4.835296940520363	5.5546077394669116	4.830140398132782	5.090904721045965	4.972573669871916	3.4412375530661117	5.115642653152476	3.938486448023765	3.959035764468888	4.953350117477316	5.502112826437224	3.9891572376166313	3.9861253163986063
Asp Leu Gly	0.008216	0.1439	1.8539	1.2416	1.1295	0.1756	yes	up	304.15	3.238	M+H	C12H21N3O6	62.9	0	4.694	0.4534	4.156000000000001	0.6005	4.295821340781058	4.243770409863764	4.604997314114227	3.86058780311746	4.6027409005649265	3.7444067795372735	3.628974242603007	5.279714581952047	4.781321992592708	5.388149438168306	4.2674332188985975	4.802966542470705	4.529254787918303	4.150010683602988	4.800024221536464	4.082855127614209	4.097071118796168	5.032015960057664	4.643013820781731	4.97103765362662	4.784401618128547	5.322704346764692	5.107322685965643	3.4940395857468385	4.432605569877194	4.455075900273012	3.7952580269419682	4.445555893196923	5.519468422773628	3.7569557407231455	3.5210508102252143
Muricoreacin	0.02351	0.1919	1.8511	1.5382	1.1325	0.1795	yes	up	667.415	7.0569	M+K	C35H64O9	0	80.7	5.95	0.5762	5.254	1.051	6.294061372036426	6.116100589838376	5.5190015813214135	3.70541698924324	4.700473042796842	3.866737366995404	5.444404365719847	4.8572055402829815	5.526279447382572	6.4704212158992656	6.247866260896612	5.177849994864782	6.291482544295652	4.822543025990048	6.221763350380416	3.8359290533727095	6.457776797333798	5.851146564898848	6.457845226150112	6.207977924380453	6.330154992883132	6.649078801150267	6.236170309746603	5.59356030941946	6.297736018553021	6.3186705348102015	3.8592610433109247	5.782754079308293	6.4243835447880615	3.8289499675341534	4.523731889660202
L-4-Hydroxyglutamate Semialdehyde	0.0033060000000000003	0.1128	1.8465	1.2981	1.1127	0.1541	yes	up	189.087	0.6023	M+ACN+H	C5H9NO4	0	57.9	5.202999999999999	0.5128	4.676	0.3104	4.3768058527788485	4.9084427439841685	5.201146607722922	3.6557079226951497	4.509119505507517	4.537222710679557	5.039271536145688	6.270616422240558	5.1507077053154555	5.248024849754824	5.445095225524222	5.7020034245443725	4.889584673710849	5.00480674347739	4.740442356249696	4.408281475083592	5.2603073153242175	5.3944261681210826	4.802264718498579	5.343385864745115	4.775207452004991	6.2960126988222775	5.5079687859449855	4.640319629384448	4.886286488233544	3.641508827479039	4.252463934421133	4.922498791816908	5.065493393727492	4.399731655629563	4.515911266726997
4-Hydroxy-L-Glutamic Acid	0.03165	0.2114	1.8456	1.3503	0.8606	-0.2166	yes	down	144.03	1.1567	M-H2O-H	C5H9NO5	0	48.6	4.031000000000001	0.8106	4.684	0.7391	3.986289878899529	5.3627459153363475	3.7557156447012816	5.126645591360416	5.558010352298886	4.52381491492545	3.1291913720174502	4.539325489474723	2.82400058272648	3.8772208609382224	2.959559635121608	4.016512423932392	4.447699225899857	4.653658239617403	5.205647557309834	4.966946508124804	4.377767615775965	4.53450206912816	3.1404244468682747	3.3497438615565263	4.495803923486601	3.4554614585160186	3.571535147567603	5.285186208464489	5.041338053620697	5.214045958372774	5.020844675789697	4.9317870694574735	2.87107808217337	5.060001085577731	5.1417754294237366
Ile Leu Glu	0.005975	0.1306	1.8455	1.2719	1.1185	0.1615	yes	up	374.228	3.7934	M+H	C17H31N3O6	83	0	5.2589999999999995	0.3549	4.702	0.6906	4.853478681453617	4.588088606261503	5.275857941304452	3.853862247953386	4.829709364620659	4.672128424900517	5.831059873090265	4.887446160326413	5.361040125077358	5.579747205875167	5.326964651813832	5.27968895824662	5.182501626616407	4.637046557776771	4.816665385401151	4.068396607566302	5.561046387174182	5.7459237379915775	5.543495388371045	5.4913198642517	4.892911754296887	5.543686535844206	5.326397143094999	4.263887073614629	5.280380350178021	3.5917595743454536	4.110472577040151	4.821704296803083	5.4947307006579456	3.9978951788336814	4.411683176319909
Ala Glu Lys Asp	0.03712	0.2236	1.8454	1.5988	1.1576	0.2112	yes	up	462.219	0.6446	M+H	C18H31N5O9	35.9	0	5.332000000000001	0.6805	4.606	1.177	5.852897178101664	4.4350556716256335	6.007782798381162	4.321452839015893	4.390398751631087	5.2823869189045825	5.72744022922352	6.062476847293032	6.328813576321392	5.138586822087236	5.385622868733792	5.152550721788313	5.697355256387959	5.38690498301685	4.915264762758125	5.036875143248334	5.128554208650088	4.534293238555815	4.159893994897935	6.607048798718831	5.248527628895213	4.988750214584403	5.555470280054156	5.079222711327799	2.8817608751323567	4.60883123792606	4.794127012582222	5.1439940104419986	3.4677065179810653	4.766661249695523	4.350528054001053
Val Ile Gln	0.01318	0.1623	1.8447	1.392	1.1627	0.2175	yes	up	359.229	3.1846	M+H	C16H30N4O5	63.9	0	4.466	0.5924	3.841	0.7135	3.6368612191208833	3.56514420400402	4.362085739954384	3.0377720134484716	4.109609782334356	3.873017095788109	5.293568798111217	3.1840758444460446	4.955588682418727	5.049635094696132	4.774458354223748	4.136126395106507	4.8688799928004745	4.181849527682086	3.742818969707976	3.4917578895641728	4.884524706927731	4.8201568186584565	4.902418801448025	4.792677737242358	4.191005343797305	4.765803217322103	4.809923560108202	3.1236902575278904	4.437585121721844	4.136540677162665	3.191522810877384	3.5971369891117244	4.878474165941432	3.161227594706252	3.4998143035351585
6:3+6O Fatty Acyl Hexoside	0.005853	0.1306	1.8429	1.4256	1.1451	0.1955	yes	up	353.072	0.6485	M-H	C12H18O12	68.1	0	4.553	0.5762	3.9760000000000004	0.4302	3.4327031226508624	4.588928429110025	4.394783107065751	4.592272435181635	3.9750099759019046	4.4620309234262105	4.047637813396308	3.815401433321224	4.756765751352332	4.170059759861612	5.816603218880706	5.0624253923234726	3.9912407084280432	4.152152903126214	4.460458062739575	3.9848833865614286	4.846849905715474	4.605203615686554	5.406911775977229	5.0308914206276185	4.615633914671683	4.929447621103857	4.550901902536123	3.86673523080134	3.3297031986764365	3.6292423010939716	3.875447877042188	4.487104439749211	4.530011308642682	3.221551275833604	4.327549364849632
Asp-Glu-Ile	0.01238	0.1589	1.8428	1.3269	1.1368	0.185	yes	up	376.171	3.7042	M+H	C15H25N3O8	71	0	5.119	0.5591	4.503	0.7236	3.778285994809096	4.400326849368819	4.580958901355081	3.598214109352559	5.30203424308351	4.1899297038447685	5.363711789446001	5.048398902180127	5.673767461545652	5.370064053510128	5.774624582879619	5.808513259780244	4.749995310136684	4.0796901570987885	5.248599544807892	4.324959398349379	4.3669534976926005	5.564186002096451	5.538157684974845	5.602183351805701	4.6116701818303065	5.376412281707452	5.105675920027637	4.356599150308115	5.193962614822898	5.209212893252985	4.068415209391263	3.5794231654669204	5.920654602258121	3.7738250479870534	4.408216398927545
Ile Ile Val	0.005598	0.1305	1.8415	1.2602	1.1307	0.1773	yes	up	344.254	4.9973	M+H	C17H33N3O4	69.5	0	4.757	0.3674	4.207	0.6589	4.218789439079233	4.309074974494227	4.365478654535116	3.0420279332428883	4.700408117103608	4.508313178108695	5.482004944780792	4.947920192085582	4.7178312340975195	4.924748612657744	4.857209141702195	4.578401134420403	4.780379672690773	4.574985365102121	4.196503978951986	3.1724598581414947	4.866983364658712	4.3118133310405895	5.180460187062998	5.2639333078406345	4.617757819441146	4.953933178035093	5.116709617858496	4.235413806974966	4.447932178226262	4.437525354007091	3.4132260217091703	3.940620745089951	5.07500983733109	4.093125653405567	3.1549469858180257
Tyr-Glu-Leu	0.009470000000000001	0.1486	1.8407	1.3072	1.2008	0.264	yes	up	422.193	4.1082	M-H	C20H29N3O7	71.4	0	3.576	0.5898	2.978	0.5726	2.33789915988863	2.506288788354252	3.3744947396880227	2.4097339380127214	4.013173269492474	2.9340537582784934	4.495365866175012	4.259217634869429	3.6647026789019774	3.3904416573627536	3.547367365563053	3.093284391479277	3.8445256920676636	3.2036870113589617	2.9319230624823507	3.2602055494651023	3.800683577081781	3.8716831922311408	3.634768753620345	4.5679411203865214	3.4594619548412657	3.8370452429874606	3.3109959342405646	2.5340217034567565	3.4924593837947344	2.2063877804440297	2.6776338865175244	2.4783959701705167	3.8023754891159456	2.797760003409207	2.8249106696714894
2-Acetamido-3-(4-Oxo-1H-Cyclohepta[B]Pyrrol-3-Yl)Propanoic Acid	0.003942	0.11699999999999999	1.8396	1.3265	0.8509	-0.2329	yes	down	273.088	4.2524	M-H	C14H14N2O4	51.7	0	3.265	0.4355	3.8369999999999997	0.5792	3.7136333472509913	3.860870970428929	3.1716246433705932	3.9357885584803634	3.1627171099508464	4.272604844652562	3.312955493403257	3.5489881088764688	3.181082893152155	3.7914400281052223	3.6207625548614435	2.6429240165178345	3.400531197987088	3.556535839861538	2.776757205290366	4.161017888873231	3.919279152880209	3.504440817031661	2.8649567335761352	3.4799790164056126	2.5990786751956625	2.633111033366661	2.857753069758025	3.2420296150660164	3.5567280823163694	2.8280082330947405	4.485220902760365	3.741412592833314	3.703724679671841	4.1605141769754015	4.303706642946644
Tetrahydrouridine	0.0011070000000000001	0.0725	1.8387	1.2678	0.9075	-0.1401	yes	down	293.101	4.0067	M+FA-H	C9H16N2O6	0	41.9	4.795	0.2772	5.284	0.4771	4.648763454975411	5.230617131728389	4.821066868360101	5.9792860228084965	5.157554077567234	5.507037516293938	4.7224580203804525	5.239090282349749	4.283316516010759	4.586066427095287	4.982280581757662	4.333904961610316	4.953516538567938	5.316354345058053	4.8233062836460565	5.97805226292099	4.792542943245767	5.096791105143272	4.875903158902144	4.784608620377849	4.671599900793241	4.657917329281759	4.439656029102941	5.6858621938463285	5.235370065958267	4.722302351415205	5.596607214300241	5.561554921906519	4.116852147984825	5.835218616593741	5.442398099871213
Quinoline	0.026010000000000002	0.1975	1.8381	1.3395	1.2584	0.3315	yes	up	130.065	3.2327	M+H	C9H7N	68.2	0	3.385	0.8305	2.69	0.7572	3.4519042473913077	2.8774493441320352	2.694173761250726	3.1489508313433987	2.6378294533969693	3.0838168431289668	4.6289855768719415	2.3999600907112084	2.7055478032014983	2.4806315981672142	3.421647442134431	3.4350864584775995	2.941872207201319	3.237651282833223	2.681390068907667	2.1370141952723167	5.0771302655861765	4.982438439715934	3.3585283271887563	3.7092235282823096	3.6209283563884256	2.9158563980001384	4.295559046535646	2.4203670363016734	2.7978496870619916	2.9127929619240462	1.9565098956408007	1.7861818262504483	3.097313582398241	2.1481230585812745	1.9161230047069584
Ile Tyr Val	0.04286	0.2371	1.8369	1.2271	1.2131	0.2787	yes	up	394.233	4.7139	M+H	C20H31N3O5	67.7	0	3.8939999999999997	0.8601	3.21	0.8996	2.1768393091745306	2.2313664292009068	4.1640974573311205	2.1881489601646065	4.079177429223211	4.148492340309209	5.023409557670019	5.044613688920276	3.1372644031957404	3.979989032079591	3.880788464648631	2.850820428275924	3.849544925779496	3.7054272033272118	3.6901246015110116	3.2698781997714215	3.711827620968416	3.475279102957721	5.0150033671696574	4.980627285873193	3.9181880257891186	4.219027241944198	4.551120361878496	3.5847447560984684	3.2695817148758497	2.065743735312431	2.341177618642164	2.1694777035227863	4.3985987242728335	2.3110053080960617	2.300512680341116
Ajugol	0.01817	0.1787	1.8337	1.3353	0.8183	-0.2893	yes	down	371.128	3.1309	M+Na	C15H24O9	0	41.6	3.1710000000000003	0.5807	3.875	0.9902	3.0255538468730494	4.3893261168089985	3.3010720478186704	3.1947874538956373	3.4955668966465168	5.718200585144763	3.3587782357876845	3.480620071709022	2.8426704020978613	3.4300126682736987	2.8877816752732426	4.034346848772806	2.8162690623132978	3.3964991148190085	2.9638165413270467	3.875679477769978	3.2242147652513182	3.9932530136670974	2.282578561835128	2.854640199044688	2.3771942494436584	2.206561067676541	3.2889841862973834	3.57691507347611	3.989002829323177	1.951576715666569	4.089080594300446	3.821878863519317	4.118925993054471	6.503327271284603	3.62284625596505
Protogonyautoxin 3	0.04186	0.2349	1.8337	1.3071	0.7885	-0.3429	yes	down	490.032	1.4133	M-H	C10H17N7O12S2	0	61.4	2.736	0.9539	3.47	0.9024	1.8172482495676083	4.169996478814778	4.419392866168028	4.801779541701706	1.961486795097077	4.911493111949547	4.283054188139484	2.604651282272162	2.623238636312619	1.9202963086291682	1.809065925323561	2.546488166020572	2.947375877736833	4.037125183965869	4.3121643467653925	4.334800245577055	3.3052438972561675	1.8224500297748798	1.8496652350966238	1.944433365801076	3.1186640394940226	1.8339277697618488	2.7026302626744974	2.976690896426884	3.851922518546772	3.1915982523890363	4.285854929079823	2.9615878186384155	1.7748565499756084	3.630464744604491	3.848924462587236
Ile Leu Thr	0.008464	0.1454	1.829	1.2634	1.1189	0.162	yes	up	346.233	3.8897	M+H	C16H31N3O5	88.1	0	5.196000000000001	0.3786	4.644	0.7106	4.920555489996627	4.53629206164562	4.993526995271319	3.4687855634988844	4.773443269693941	4.905166579202073	5.8756750553179655	5.1133287567636385	5.252842680281126	5.421502958670956	5.198574237156055	4.708916067609831	5.351764194609324	5.089791727404627	4.526393363795625	4.169873714089826	5.476854342410401	5.167575371327113	5.6768628184136665	5.554361317364062	5.2363109963786325	5.34448055332505	5.588166428193872	4.101583072543455	4.801306042907703	3.9412509030247587	4.527842083378377	4.442016025545429	5.6408648142196265	3.592303191429739	4.168608149511018
Succinic Anhydride	0.01551	0.1701	1.828	1.2527	1.1268	0.1722	yes	up	99.0087	1.3382	M-H	C4H4O3	56.6	0	5.252999999999999	0.7081	4.662	0.45399999999999996	5.624739508988272	4.959105146632694	3.9756674504326974	4.597672663124159	4.948341521175138	4.7519731986301466	4.096067645353267	4.116636575748495	5.5657748806528655	6.0497135923597645	5.909487586022103	5.693237882489503	5.294646252616043	4.822194789958114	5.168513732795662	4.6494883975034496	4.682553416271333	5.650477838645423	5.572785607293596	6.328722109663127	4.511855428594517	6.07456389982617	5.591294567510924	4.851538279342745	4.535974038977733	5.550945925255374	4.528089451591753	4.878754865366312	5.884110524451001	4.375855175159709	4.3875347675613705
Pirinixil	0.02493	0.1944	1.8207	1.4011	0.8416	-0.2487	yes	down	401.058	3.2156	M+Cl	C16H19ClN4O2S	0	41.9	3.635	0.8725	4.319	0.6141	4.123655720279704	3.567555071573928	3.19800786663892	4.445265446807354	1.9574633742792915	3.995296775558393	1.8798856049975088	4.551781328341465	3.7098481212473424	4.603357297848311	4.041849012522488	3.7476626765705	4.093366787843072	4.9197213844286125	4.258008256904809	4.14583207155111	4.42634750369148	3.580883504987152	4.011460707797035	3.1694870154780386	4.278281405621608	1.829919594822476	4.028239134644826	4.6175431419650685	4.10654348660755	1.6833912444383752	4.496461310100477	4.9015619559442785	3.212813242566042	3.947350740896369	4.896567054540408
27-Hydroxyisomangiferolic Acid	0.01039	0.1513	1.8194	1.3609	0.8957	-0.159	yes	down	531.368	6.3142	M+Hac-H	C30H48O4	0	51.1	5.442	0.6847	6.0760000000000005	0.5203	5.757611030297973	5.758361219234973	5.164204212368381	6.3763629413879706	6.0339017515000135	6.4331482660123	5.470073115534773	5.810780608416669	3.38366914848619	5.584994933865565	5.223913617569309	4.983809870787266	4.911065770303527	6.175436834361278	6.426066373235848	6.6912868713112745	6.0127694149193225	5.883030569622012	5.396252482990302	5.71354332320077	5.9558128737962654	4.419593770772893	5.505534447635252	6.253464447322528	5.7155470868124665	5.7358423806784335	6.670228380269313	6.454596843954422	5.459746833416993	6.876699064703372	6.116449234683013
Phorbol 12-Myristate 13-Acetate	0.01153	0.1561	1.8182	1.4016	0.877	-0.1893	yes	down	617.401	6.3118	M+H	C36H56O8	0	59.4	4.8069999999999995	0.6914	5.481	0.6538	4.648650590941026	4.114920980141541	4.22664092129885	5.9302460649525255	4.12438372023902	5.826356175032225	4.5283711300998055	5.007438970631181	3.117079798373976	5.1263503336057	4.62026578541404	4.647490576141832	5.440368484988917	5.652625472398587	5.3257460164150885	6.189567987166206	5.790211083121616	5.432223924945427	5.197221968850463	5.384497622309425	5.856571772863525	4.0797631625621165	4.670246653915836	4.939490810091009	5.2923204224802864	4.606867422454101	6.275668983026542	5.5109978542895055	5.322377807019468	6.811429270350004	5.411941584174348
Lpc(18:0)	0.01668	0.1729	1.8146	1.3233	1.1212	0.1651	yes	up	568.36	6.6022	M+FA-H	C26H54NO7P	74.7	0	5.837000000000001	0.4184	5.206	0.9551	5.391672576517581	5.383540375217675	6.124366007916166	3.8006345715858973	5.428635648602637	5.046967081153261	6.027167227551991	5.614054827460481	5.005278229625809	6.2312286378545885	6.386055509561911	5.9370856731124375	5.9313391704153835	4.415331498725023	5.504154693065498	5.142160232905908	6.0885567281317305	6.417687319283098	6.302220795478621	6.130793547562059	6.03266031078637	5.215604655960268	5.758571491056937	4.952409255686219	6.367647715065561	6.150978687603932	3.9619374284983366	4.836708419799037	6.192315077673272	3.9502287212489873	5.453066199879892
Neamine	0.014480000000000002	0.1659	1.8133	1.3433	0.8406	-0.2505	yes	down	381.202	5.813	M+Hac-H	C12H26N4O6	0	50.5	3.48	0.5619	4.14	0.8547	3.1189413549626486	4.539111779046496	3.768860080606856	4.403248216151994	3.5820003282573354	4.857570223082023	3.051499126734144	3.5886099528030577	2.387216635211913	4.116137840623083	3.6028836780549813	2.5457774858220037	3.092364820680157	3.3574896728124317	3.9263944799385286	4.269052804148799	4.025018879911936	3.5381872671625687	3.36105166606269	3.4863560270466882	3.761746421822228	3.967239739416762	2.658520624973569	4.842662469655023	2.7955486838043035	3.365022859348306	4.881343521195032	4.709077291709913	3.7940340359422806	4.424937748437912	4.284475024315103
4-[(4'-O-Acetyl-Alpha-L-Rhamnosyloxy)Benzyl]Isothiocyanate	0.02445	0.1932	1.8131	1.297	0.8087	-0.3064	yes	down	412.104	5.0812	M+Hac-H	C16H19NO6S	0	51	2.853	0.8689	3.528	0.5775	1.349471232387636	4.732321999391816	3.3410335014263848	4.4495510266926654	4.324126782778201	3.527191558297113	2.734142802747245	2.557772098333874	2.115163735043536	2.225155414448351	2.9001774774025195	2.3723905625595685	2.1240377605081515	3.723171316104804	1.4405277344873555	4.560573764198872	2.4798628112269667	2.88543103490966	3.4567376527481164	3.4448755610308	3.2120614559174268	2.8706507333809625	3.635415390793392	3.8800679023851954	2.212482122275869	2.7280711396579536	3.337267607039113	2.967166719776853	3.0846531333571483	3.8660931573564867	4.1820215110986165
N-(2-Hydroxy-3-Methylbutanoyl)Leucine	0.008366	0.1447	1.8096	1.3509	0.8586	-0.2199	yes	down	232.154	4.6126	M+H	C11H21NO4	51.3	0	3.662	0.5907	4.265	0.5553	3.7187960607001873	4.222889263687922	4.305146670765538	4.153517378368777	3.8851574617442077	4.566071056938246	3.821260351407976	4.4455958382404415	2.486076479449329	3.2354474083312845	2.663182359233919	3.276438403901259	4.041444198236581	4.666812707141959	3.6673340234124434	4.347687126690584	4.1832365704699175	3.3494618310340285	3.6635977321361617	4.16340621680601	3.919311464011408	2.5581912136040144	3.9789734706273614	4.564731840666346	4.18482029224476	3.0364788624241523	4.909942358906389	4.464869221716091	3.711129726510241	5.1517942621438255	4.785582593597581
Cinoxacin	0.02001	0.1828	1.8073	1.4416	0.8447	-0.2434	yes	down	263.063	1.8079	M+H	C12H10N2O5	53.8	0	3.694	0.8648	4.373	0.5019	4.634319997266124	2.5901099286349494	5.318630686897892	4.531344430501114	3.746224507268517	5.7646032093588255	4.521619479772913	3.3979965365899507	2.7763441945064096	2.7116591824867955	2.69008673769852	3.6842414810944697	4.037284019852399	4.8902322224035935	3.758033399613101	4.685817275551087	3.809889694133605	3.477636624472228	2.6860468280924743	5.032855530691527	4.413390145369587	2.5850800635209827	4.319776382077084	4.563679650230867	3.359200492925912	2.4238173642523373	4.771788215815524	4.817512699936642	3.900772271415757	5.133434053837584	4.512323778156938
Vitamin B7	0.004792	0.1264	1.8047	1.2835	0.8611	-0.2158	yes	down	245.095	4.4089	M+H	C10H16N2O3S	93.5	0	3.3960000000000004	0.3595	3.944	0.6426	3.6350429909893083	4.282156894276744	3.3720214093566327	4.620409432645551	4.193206245826231	4.393907880253527	3.3569654478656523	3.2793168548505767	3.316016594058044	3.40643136762282	3.2881407829928033	3.6143901164026895	3.1272205377756173	4.526998459847143	3.2547274554815613	4.808559668237897	2.7313605056688703	3.038230120016098	3.2143421436333965	3.2092658241020864	3.5097796196883766	3.445577488241246	3.2503060778356065	3.7107505139171306	3.684903582941832	3.3930089004876853	4.788917886059552	3.7329341080771763	2.9599593498046195	4.557282838797911	3.983037925864095
3,4-Dimethyl-5-Pentyl-2-Furantridecanoic Acid	0.03644	0.2227	1.8047	1.2561	0.8454	-0.2422	yes	down	377.306	6.7462	M-H	C24H42O3	0	46	3.867	0.6546	4.574	1.146	4.659374095633378	3.5226488335120805	3.2667416325196736	5.264016161887104	5.29651251526098	5.134079624827819	4.61029720376584	4.290762137813109	3.1575086163767656	3.458101146869359	3.345371241339325	3.2353005526664287	4.198898814672428	4.002865948374851	4.1341025852424895	4.8523371744187775	3.4326443677268794	3.3589570532139943	3.3865634613142213	3.4825153518730683	4.799736101251527	3.3706028161539825	4.472246457194177	4.136109478779411	3.2996328959913432	3.5507684195303564	5.049362496812132	3.936516818485092	3.3106166821749214	4.156894514070984	4.212538792844205
(+/-)-Sphaerosin	0.0031609999999999997	0.1106	1.8030000000000002	1.8249	0.8788	-0.1863	yes	down	347.115	4.525	M+FA-H	C17H18O5	0	50.9	4.004	0.48	4.556	0.4415	4.051199683779071	4.786884296074411	4.524113701481184	4.326087543332185	4.071362632422578	4.6737464928950905	4.330797584852922	3.156813636486908	3.5595641262902284	4.205963841640589	3.9812840018700872	2.8020556834542103	4.094945276932012	4.102330172714082	3.970774341792438	4.4285207652489165	4.2631533906307215	3.719471409607253	3.77106615934932	3.677706189974016	4.49842608695802	4.372621275764399	4.228625061456654	4.092770849302299	4.377880618959757	2.7882944695064773	4.535091271417273	4.418767829303182	5.474557599989047	4.624700257357363	4.26975427198608
2-(4-Methyl-5-Thiazolyl)Ethyl Formate	0.00821	0.1439	1.8011	1.2788	0.8395	-0.2524	yes	down	216.034	3.5745	M+FA-H	C7H9NO2S	0	41.6	3.049	0.5242	3.6319999999999997	0.6078	2.7861387203068806	3.9466016806280897	2.7739687633583494	3.5984390388571867	3.7039588491169573	3.958872570254489	3.287820882787164	3.0356314429034765	2.0727087311765735	3.562868903623639	2.5499783825437663	2.3589818016948034	2.811161783008793	3.421570724064466	2.362074679824916	3.375947593659547	3.535779065392301	3.5402692038125814	3.199101512976132	2.6333419321621614	2.887616497128953	3.572863243554321	3.3049077834013683	3.5908672175076446	3.442399406328172	2.3774913513944846	3.8616838093394064	3.210169006590681	2.9739590370171225	4.349074144957297	3.993759163041228
Aloesol 7-Glucoside	0.015590000000000001	0.1706	1.7992	1.4047	1.1594	0.2133	yes	up	379.136	3.7614	M+H-H2O	C19H24O9	0	76.4	4.547	0.39299999999999996	3.9219999999999997	0.9449	4.413337367338348	4.8278330839024735	4.075726692565828	3.3528303974517093	4.087225899740738	3.385417840203909	4.712379056079769	4.94751143756961	4.100023854952384	5.117171316462036	4.500982759158647	4.691678020587258	4.663267454186101	3.5616845260119248	4.862474746652628	3.1009131010290965	4.800852621933854	4.940500420442351	4.791326263908246	4.5885789373379415	4.4922968785482364	4.2329968407598	3.5379417942451936	4.52029632787681	4.419100226872274	4.449723852432613	2.4566547195132755	2.0580011569541794	4.380131323432873	3.770908818151553	4.854031391969769
Asn-Asp-Leu	0.0018449999999999999	0.09358	1.7942	1.2315	1.1004	0.138	yes	up	361.172	3.3716	M+H	C14H24N4O7	78	0	5.239	0.22	4.761	0.5465	4.781154293759527	4.944373818970746	5.0144498349381665	3.780576766081244	5.238509585309456	4.6633484591562	5.212818595800845	5.506125716777141	5.2652300599492525	5.4478034022425055	5.581687977218243	5.2775522008745845	5.18618897558792	4.6184692300124	5.17605180846696	4.042916013983393	5.284442082771461	5.414331814819335	5.284943441910488	5.460822502341551	4.871519475620388	5.467017403952516	5.134574089587061	4.4573097577556045	5.163269543586623	4.537829141971595	3.9258850857938095	4.621320888244084	5.5485020582007625	4.6497880521654675	4.030506333572286
Docosahexaenoic Acid	0.04442	0.2402	1.7901	1.4552	1.1657	0.2212	yes	up	327.233	6.5167	M-H	C22H32O2	78.8	0	5.607	0.6887	4.81	1.419	5.811482410715697	4.6704023461752735	5.4687441617045085	4.625435307051569	5.90442056782415	5.036723992837906	7.589931303350679	4.913497357125788	5.5853342061118605	6.024383429308273	5.504469682931041	5.612811686701241	5.107926257509629	5.231200010683309	5.460676909671398	4.8927806932034645	5.795663222388015	5.9668624940332196	6.189870585737821	6.12965762759078	5.361602623024872	4.3790162015429335	5.06183353812212	5.151949967258559	6.176497608826336	6.093609530797597	3.1717871770791453	5.511433239707036	5.688072677881419	2.276963493194492	4.313077574768692
N-Methylphenylalanine	0.02325	0.1916	1.7867	1.5279	0.8447	-0.2435	yes	down	180.102	2.8578	M+H	C10H13NO2	97.6	0	3.525	0.6395	4.173	0.8658	4.163196170562629	4.9262836864232264	4.0441112185212775	3.212200004374864	4.105649377758883	4.6735256455340135	3.7838277762018686	3.783483359812668	2.939151515074398	3.15933095651998	2.382457427735362	2.78560142415918	3.50417	4.7008873718380775	3.274209719183661	4.573048019114252	4.305141847846944	2.905062813218658	3.056395435982378	3.1253342919113987	3.9626772615414034	3.0274395160485645	3.741044516751706	4.5349715873734855	3.1370954664979482	2.8930970000783924	4.986365181254256	4.306960402855686	3.041992397869617	4.753646399425093	4.609402516943381
2-Amino-3-Cyclohexylpropanoic Acid	0.011309999999999999	0.1561	1.7858	1.2455	0.8704	-0.2002	yes	down	216.124	3.8247	M+FA-H	C9H17NO2	0	50	3.8960000000000004	0.6242	4.476	0.5034	4.029617620346951	4.931601387749118	2.7658808907678654	4.512202796820817	4.492341729332625	4.914624263146762	4.119739265131487	4.564999608371493	3.121410447767651	3.575281244576463	3.0595007018779468	3.4775781853272782	4.2739512972225535	4.7726114852991	4.016678809701813	4.678477733378908	4.4587891545761575	3.5358447963782917	3.774517795883361	4.309875593531701	4.32866724963342	2.869633613188786	4.324680752635777	4.946008487154441	4.3372806489761695	2.7277925507724863	5.041735084582454	4.697879270681487	3.8331624108244218	5.154286215115012	5.089605456846017
Noroxyhydrastinine	0.030160000000000003	0.2075	1.7855	1.5066	0.8384	-0.2542	yes	down	172.04	4.8137	M-H2O-H	C10H9NO3	0	40	3.332	0.7439	3.9739999999999998	0.7958	3.5119327047476427	4.615266195421689	3.330239898807804	4.675074641989894	4.5386333694672505	3.740438642325605	3.484650454776121	3.82030370261411	1.8137198009649904	3.028504286933792	3.0833881198483923	3.619480152119287	3.493107572865699	4.219535008379116	3.772095434581068	4.806091195143291	3.208637764735582	3.3910498949700174	2.0293171125966127	3.299163889538209	3.9225246872703456	2.013501790261455	3.326291172156673	4.923081168521622	3.4936296009215875	3.7115124529376247	4.411979791928741	4.1582651038666745	2.04918056735654	4.3496325372874125	4.060344886544937
Physapubenolide	0.005556	0.1303	1.7833	1.2785	1.0987	0.1357	yes	up	587.287	5.8344	M+Hac-H	C30H40O8	0	61.9	6.002000000000001	0.5381	5.462999999999999	0.3928	5.8310043207980335	5.644858902658623	5.611745031555547	4.970030576700854	5.906378872921406	5.505713331346529	5.747901797038791	5.716174278019401	6.9650737402895215	6.351500419296397	7.157110117140926	5.727623870488213	5.924071021321122	5.5693670374762085	5.484662853266573	5.179245523908612	5.6122828020292586	6.486653113092366	7.027537139389661	5.841023764987643	5.319672725010437	5.714272405373597	5.967264693384192	5.662818956855757	5.794624801776163	5.681500203135394	4.912637927433686	5.130569134443482	6.051139737787138	5.080394266929352	5.543391803705335
Thr-Pro-Tyr	0.007812999999999999	0.1421	1.7778	1.2275	1.1608	0.2151	yes	up	378.167	4.5947	M-H	C18H25N3O6	54.8	0	3.906	0.5057	3.365	0.526	3.8320473450771337	4.105798291971387	3.676249329026704	2.7244058098894133	4.188644225370186	3.448079754961887	4.453099794998663	2.717646812625254	4.2090968563310485	4.0480498565230825	4.417176833827742	2.534279292540019	3.954304137969008	3.8551369753749793	3.72576826500102	2.7132052054902416	3.783814792521455	4.041300629253736	4.41708804617653	4.056476470046864	3.8482084110843653	4.2159952475591815	3.994333008384898	3.2548769044678907	3.76568	2.9463714823986384	3.4946861538733693	2.989277821925456	4.303617449568542	2.728719895487896	3.1529154701260573
2-({2-[4-(4-Fluorophenyl)Piperazino]-2-Oxoethyl}Sulfanyl)Acetic Acid	0.008036	0.1432	1.7712	1.3452	0.8872	-0.1726	yes	down	313.102	3.1953	M+H	C14H17FN2O3S	60	0	4.461	0.5503	5.0280000000000005	0.5223	4.771916170408074	4.24343618158436	4.005456995213483	4.9746321128213165	3.676848311854136	4.623813742974157	3.5055741954109485	5.197425768771321	4.280454332609978	5.3836276362498685	4.782207987587691	4.599860338763538	4.592147614055402	5.635050592045599	4.771740328609626	4.810253391262499	5.0982624325565284	4.462353995545719	4.598909617978348	4.087227411672549	4.761128255395626	3.3489157787461417	4.5975320155794135	5.114553553823517	4.7746641477077265	3.203652380047652	5.384572090920329	5.392224768213588	4.270983586613073	4.7432040845755585	5.348466320946837
Aspartyl-Glycyl-Glutamic Acid	0.0053950000000000005	0.1303	1.7664	1.2528	1.1198	0.1632	yes	up	318.094	0.6378	M-H	C11H17N3O8	87.5	0	4.824	0.4897	4.308	0.4218	4.071215278856542	4.868158621498711	3.9672009451854438	4.527006585986554	5.296261419754753	4.309814413941909	3.8953190816784646	5.140494487385231	4.657359404418262	5.265306867416413	5.318073654891523	5.010841171767507	4.7301204301875375	3.645075159814893	4.974093394530722	3.87614274251404	4.537450165251956	5.145853004296531	4.590264799856156	5.188798297413527	4.569816006548389	5.73948858553003	4.683735970896871	4.0333397212747775	4.886997616947954	4.7973308442292195	3.9885067057684633	4.128495987071238	5.18790070367046	4.20301700371818	4.0551928937410535
6-(4-Sulfophenyl)Nonanoic Acid	0.014519999999999998	0.1659	1.7655	1.6325	1.1331	0.1803	yes	up	359.119	0.6485	M+FA-H	C15H22O5S	79.8	0	4.996	0.7088	4.409	0.4087	4.7121756548135485	5.22402037908808	4.946139436637687	4.191855835449566	4.820055184840295	4.501158076747647	4.599998222655822	5.382230977421669	6.587910709932514	5.0629524239728285	5.2605916423774435	6.709441286371727	3.7811854172955393	4.320147987575286	4.512112954698873	4.618315613492698	4.28168504370732	4.745549628883473	5.232347520210567	4.955770629849765	4.17567282001081	5.040549732862788	4.890256599325828	4.565802064720266	4.729181695329995	3.72798309490497	4.889348438943618	4.4798774673237975	5.091664419278925	4.395250773397317	4.251721717330351
Lys-Gly	0.02717	0.1999	1.7605	1.3924	1.1516	0.2037	yes	up	204.134	0.4918	M+H	C8H17N3O3	56.9	0	4.709	0.5798	4.0889999999999995	0.9091	4.690321987990092	3.65340790613764	3.0040701148131297	3.8735604199180136	4.721515546031326	4.516927331219917	5.269232333233786	4.521648179120086	5.334486081790881	4.845613761512873	4.95539343073133	4.985456954551261	4.9023812257547625	4.568840341555247	4.00118567661094	3.8512503074701607	5.118607922062923	5.092077193784171	4.9074219329477735	4.964710670372706	4.55155168735108	5.0359380634154345	4.919837742478454	3.630887688230632	4.672917195225856	3.930808943043601	3.0467887869105104	2.8743137437199326	5.202568096590745	3.0165015603142216	3.9740032736694975
Asn Glu	0.002227	0.09972	1.7601	1.1753	1.0895	0.1237	yes	up	262.103	0.6182	M+H	C9H15N3O6	62.7	0	5.428	0.2776	4.982	0.4648	5.170919753582346	4.996964778614231	5.283336092397959	4.904891235886637	5.317968431999481	5.039788336841019	5.265062318494592	5.609096534047217	5.3009986339383035	5.727369965198943	5.446205516520183	5.831637791997317	5.48108849211162	4.922622830967816	5.10574279277025	5.007909337887847	5.331952073642976	5.979325183323995	5.096233519330637	5.673431321427211	5.197848864881365	5.7683228241841125	5.551033491306479	4.622151935351068	5.303108129112879	4.513510308868693	4.681924115321139	4.714128718783097	5.829453820820406	4.176737406311874	4.6506061148999285
(2E,4E)-2,7-Dimethylocta-2,4-Dienedioic Acid	0.008020000000000001	0.1432	1.7571	1.4587	0.8409	-0.25	yes	down	163.075	4.4571	M+H-2H2O	C10H14O4	80	0	2.843	0.5689	3.3810000000000002	0.40399999999999997	3.0761560128632297	2.171094506807503	3.1135581378512702	3.1444201809832286	2.2936402912128835	3.3673988424749326	2.2249848025418744	3.6193203208859055	3.619445124095831	3.600302066104636	2.270697434995475	2.3242431171419424	3.1868284000769216	2.2203224982300265	2.9676344700490804	4.1179262088660415	2.471255434608965	3.0063377451075186	2.2666710293264267	2.5625952316669705	3.3824022730674868	2.1660858126280083	3.6965721971126113	3.8559377144345186	3.6545106634078968	2.79561316610928	3.4271797425045287	3.415600881051306	2.3181368795681565	3.580746472724541	3.4035246787484086
Undeca-5,7,9-Trienedioylcarnitine	0.025419999999999998	0.1957	1.757	1.2387	0.8347	-0.2607	yes	down	388.153	4.2417	M+Cl	C18H27NO6	0	60.5	3.16	0.8293	3.786	0.4933	1.5512196063776191	3.678449536515838	4.0648261801006225	4.0225855265825645	3.8578951490576734	4.453245781193559	3.514480041258853	4.006278010483332	2.7918172545258524	1.6530668416449728	3.257079486615448	3.7727723616830615	3.244102014942944	4.101135161415348	4.264191392000681	4.261498201903724	2.68938276813676	3.0111662010029074	4.075894525147052	3.3075494299442583	2.626834774335582	1.7825894241014102	2.892248395883278	4.193540945838883	4.102316879482814	3.7409654984591962	3.9978688814658216	3.3591964513757238	3.062134317893995	4.1864080756947	4.178235781521879
Umbelliprenin	0.008803	0.1465	1.7553	1.5867	0.8783	-0.1872	yes	down	389.205	4.4143	M+Na	C24H30O3	51.8	0	4.178	0.5395	4.757	0.5893	2.7466253978005644	4.570542835459685	4.266337199150095	4.43894556791045	4.413138960639008	4.0599238828533215	4.169231637319244	4.187628263906306	3.956702621842272	4.921053960151363	4.6549943532322215	4.414093720712454	3.730950365729836	4.130194988798531	3.8018736816359486	4.760486342508251	4.5546421548845295	4.639732237095601	4.942902224005191	4.264102892354178	3.4279892602599578	3.7218667153214215	4.004966502525845	3.9064889112320937	4.605904364174831	3.9312541401482033	5.481523995234338	5.362865227839375	5.258837071542008	4.856288047645643	5.6276295295167005
Ile-Val-Leu	0.008468	0.1454	1.7496	1.1939	1.1607	0.215	yes	up	342.24	5.0064	M-H	C17H33N3O4	49.5	0	3.784	0.4482	3.26	0.5816	3.1693492284542137	3.32949876058194	3.26455787151713	2.6557242586905536	3.8447224581068378	2.75096012028332	4.6875145616027565	4.01811477813472	3.7086329643680895	3.880104423893126	3.811304042485181	3.507195626888377	3.9200459590107983	3.5022279045462965	2.924899297994884	2.64452732808822	4.016020190991583	3.2632912997355588	4.216625094773587	4.33690351370777	3.7756404982304335	4.057321681724825	4.166245050161407	3.2320503956198436	3.3427417782901743	3.49948635378109	2.6746847336400448	2.690727987866396	3.9808875430268884	2.6600369543448155	2.707233471347957
Asp-Gly	0.02795	0.2024	1.7482	1.3143	1.1340000000000001	0.1814	yes	up	191.066	0.5756	M+H	C6H10N2O5	70.9	0	4.8919999999999995	0.6522	4.314	0.7148	4.466927195525675	3.790511048887601	4.565918669046245	3.790597469521951	4.148358812433641	3.751626031367808	4.060782496002067	5.5543405381924735	4.980880593768989	5.682334266736902	4.463403017122959	5.433326232720917	5.165345140666798	4.232393759658819	4.546774660958175	3.5858961622251497	5.041573004801013	5.874272967480417	3.998306658403808	5.018660638760677	4.779572942951077	5.907115519604193	5.463115985819161	3.809355227357512	4.847906385722249	4.4794733299783855	3.6092255717795454	4.79199966156152	5.734316036266048	3.5789178755532665	3.7804009608100295
Ile-Tyr-Phe	0.0071319999999999995	0.1372	1.746	1.5055	0.8683	-0.2037	yes	down	442.233	5.7557	M+H	C24H31N3O5	65.1	0	3.8510000000000004	0.4435	4.435	0.6833	3.6617678538126817	3.881367558317585	3.471034954182878	5.545908745066326	4.1853830073766725	4.603932918768686	4.303953570582829	3.184658515389968	3.431364364255656	4.34929987003128	4.028093335818888	3.2086328907631687	3.6802929820289054	4.264550511605356	3.124411665249532	5.408605209918625	3.5015310115018945	4.208181277037928	4.5446001901022886	4.419519236027933	3.9542609573202654	4.179358709863744	3.851098738653305	4.644992001235933	3.7705104640868687	2.9151560559131164	5.4389773852783705	3.6643476683847065	4.712490449569058	4.741515542418688	3.5334900499942226
Orciprenaline-3-O-Sulfate	0.01608	0.1713	1.7459	1.6321	0.8582	-0.2206	yes	down	355.093	3.2703	M+ACN+Na	C11H17NO6S	0	53	3.2439999999999998	0.4871	3.78	0.6805	2.8281455796523494	2.8829393062929847	2.9504820105355254	3.5148641011142643	2.9296640674344645	3.9294041870238967	2.937106806055445	3.2724355832124	3.6258664385342274	3.68224727119923	3.869784948364202	3.504214224110658	2.816445448432673	2.9324218619841083	2.9255289208785245	4.215844268343756	3.4398133390729217	4.708471545057648	3.33897009253954	3.2888056392895693	2.7962222849168348	2.877903048307429	2.9654165827002386	3.4372622703908395	3.9490230591057656	3.1901519568704524	3.08094176240386	4.238356461919685	3.0089341642496272	4.0834551711455696	4.090550128261183
(E)-8-(1-(Hydroxyimino)Ethyl)-4,9-Dimethyl-2H-Furo[2,3-H]Chromen-2-One	0.006029	0.1306	1.7441	1.4795	0.8871	-0.1728	yes	down	289.118	4.6925	M+NH4	C15H13NO4	40.2	0	4.103	0.5436	4.625	0.3446	4.476967574711753	4.361388394373595	3.6664613144406535	4.438819268125047	3.649207928405609	5.006747270896805	2.9608537383699205	4.27919692256315	3.9449511290894073	4.935120520431688	4.6176747572928445	4.736252120755101	3.900983211697411	4.274915816106925	3.604594905811422	4.633768491280066	5.121349460174408	4.038311424162975	4.3252467452981085	3.972426398642845	3.3688078758678404	3.857357065872733	4.135993224461143	4.518561012972689	4.7087978929109235	3.072459513610283	4.768409627837593	4.584394137287831	4.290162178822849	4.923911170732622	4.3759379272000665
N-[2-(2,3-Dihydroindol-1-Yl)-2-Pyridin-3-Ylethyl]-N'-(2-Nitrophenyl)Oxamide	0.01854	0.1798	1.7409999999999999	1.2676	1.1079	0.1479	yes	up	432.171	0.6499	M+H	C23H21N5O4	40.6	0	5.82	0.6452	5.252999999999999	0.565	5.411831504941717	5.340000709932662	6.099177712675665	4.040375329517263	4.588243293934576	4.507240359674205	5.443151529231648	6.644423600549728	6.3409505098166745	5.9455557426966275	5.88731368760206	6.355569718823782	6.056009943778384	5.814681329414183	4.150034953796046	4.429770531595005	5.750521888701504	5.831432567545277	5.876453350729087	5.816734682860553	5.887390494611196	6.792412144960897	6.365389367816821	5.5287981579436405	5.173927990982273	5.44694440106399	4.3463726967976335	5.56360826206848	6.085920884006662	4.96810085303394	5.51554615121454
Secoisolariciresinol	0.03589	0.2213	1.7402	1.3176	1.2089	0.2736	yes	up	361.165	5.701	M-H	C20H26O6	77.3	0	3.6289999999999996	0.79	3.002	0.7427	4.098350205036959	2.8439080437670112	2.9596766539986183	2.6407604850743653	3.0025666401766085	2.5708716609619287	4.133094052200072	2.468984004096287	2.2085543719750924	3.1599537593814446	4.503952427215181	4.4442231158429255	2.948693647441343	3.0441552221561734	4.33166984868368	2.562668993729831	3.545057482844346	4.784723948849669	3.8724840054960543	4.231039089269368	4.305008092439584	2.810688484945351	4.293264232631197	2.9170819868952518	2.350012143571784	3.5782541958087903	2.494672430669117	2.4549787356808594	4.300109182919105	2.480040868408356	2.5271870300861687
Dslet	0.03279	0.2149	1.7379	1.2637	0.8563	-0.2237	yes	down	704.356	5.6277	M+NH4	C33H46N6O10	0	45.4	4.1610000000000005	0.7483	4.859	0.9802	4.300273173161314	4.189889192002272	4.031006235950678	4.998227058440215	4.183760895426839	5.708051781078549	4.042105445423674	4.5154935510090075	3.741707769587766	4.954628952361446	5.240269433673434	3.3751442809708783	3.0156919348648565	5.368233197536866	3.12482964911763	5.288682945230889	3.959752374291978	4.3165201648492015	3.1783076915501844	5.438693422262987	5.026343346249267	3.3440509080566247	5.082640723712163	5.732483886446095	5.338582570881467	3.9172825502425312	6.027942552676327	5.0357047558841455	3.2082680824430443	5.699146943770814	4.9017573714708496
2-Acetyl-4-Nitroindane-1,3-Dione	0.01157	0.1563	1.7372	1.3211	0.8282	-0.272	yes	down	292.046	3.4355	M+Hac-H	C11H7NO5	71.3	0	2.945	0.6687	3.556	0.5148	3.938980989776352	3.370164233102805	3.7341374591845407	4.055591005295391	2.2074074539622712	4.36318704317877	3.2220748180622314	3.8211943512728923	1.8682163257875202	2.4654584473719625	2.9966106181997616	1.945091492316925	3.1700290722873445	3.784270917964201	2.865848612732123	3.0726570790703844	2.2091440573583205	3.3173474600408057	2.8129845073092965	3.8693906096629958	2.8037531623460485	2.0791396229453887	3.2586918535877962	3.110868559429844	2.7960771575701133	1.9314670767602653	4.576395673567009	3.5365284685880014	3.0533204405052783	3.914749590119434	3.8845875138507138
Hophe-Thr-Oh	0.03329	0.2153	1.7353	1.3223	0.8320000000000001	-0.2654	yes	down	389.132	4.104	M+H	C19H20N2O7	73.2	0	3.5060000000000002	1.036	4.2139999999999995	0.4373	4.546524411106401	4.052413860603031	4.7737874517043135	4.6045185107428	1.6210076295248834	4.065237777177431	3.985156855319495	4.204133971228508	1.5002757181612711	3.7729329274495584	4.562081436267991	3.2592218200269985	4.378985843797668	4.638583561054606	4.364364184831621	4.664619071725368	3.49788902410448	2.888666832235056	3.0990921482722493	2.9724581756223016	4.301103813882299	1.5704972710637797	3.254327530887048	4.366971890296123	4.2742029852186265	2.829949350917341	4.744938780195231	4.2425097600390025	3.813277085667292	4.5418125816926915	3.9269442871147655
Haematommic Acid, Ethyl Ester	0.01031	0.151	1.7346	1.4485	0.8594	-0.2186	yes	down	223.061	3.8088	M-H	C11H12O5	36.2	0	3.594	0.4691	4.1819999999999995	0.7303	3.0117537384089066	3.860459469890802	2.9248688114200845	4.18787568898278	3.9250710491101963	4.010286140625999	4.050738767492699	3.5217898378831065	2.8548493421756773	3.5126797083741192	3.720793643243905	3.1639972797088856	3.0430783643740225	3.660717469370897	3.6953038568287258	3.972620305072069	4.300942180196268	3.8388827407535073	4.4490562397300994	3.418623785499122	3.4918836306301517	3.3380306393586983	4.154260098268941	3.6832702103891175	3.4347569630149954	3.780771846750792	4.414327101092639	3.9211234898505705	4.032965402554684	4.370659287854044	4.2909704629773655
Leu-Asp-Lys	0.005405	0.1303	1.734	1.1883	1.1127	0.1541	yes	up	375.223	1.0664	M+H	C16H30N4O6	44.3	0	4.779	0.3648	4.295	0.5334	4.302887479773317	4.190019194200309	4.308488400005101	3.7061742330407954	5.270991263421978	4.27526972899757	4.959384739716162	4.8254291605822415	4.702665855039137	4.845060281638563	5.092749731457582	4.377695739758956	4.7160936369253115	4.613923632411511	4.527592809556249	3.8366863358754393	4.779515177851283	5.267667787468069	5.188985746629196	5.4715139751780475	4.526824120205811	4.5996303032773245	4.844843804868177	3.882037312691916	4.6344402218156535	3.6485630329139225	4.006478627847389	3.6873822228277393	4.84210033650305	3.934611632194893	3.976447181829168
5'-N-Methylcarboxamidoadenosine	0.009127	0.1473	1.7338	1.281	0.9035	-0.1464	yes	down	315.081	0.5686	M+Na-2H	C11H14N6O4	0	49.7	4.85	0.521	5.367999999999999	0.4716	4.4300317723912634	5.6493927953438305	5.007011060378097	5.267742317806716	6.107629078488591	5.7732012286786105	4.031067213740957	4.930158117299009	5.079415951036383	4.232346447086459	5.0467010344490975	5.313907639475986	4.54513845251279	5.955460776444068	5.2299478760244575	5.9790084843830735	4.8991978104798095	4.820054634881765	4.7788583698505995	4.883601196003736	4.691318675681532	4.034555803880382	4.446352418178717	5.831921807343826	5.206918816099549	4.9947697565479485	5.871458807073848	5.40001699333928	4.593789103377471	5.751456673387892	5.6313294347225495
Naglyser(20:4/10:0)	0.02331	0.1916	1.7337	1.3206	0.8923	-0.1644	yes	down	619.43	6.6945	M+H	C35H58N2O7	36.7	0	5.361000000000001	0.8818	6.007999999999999	0.3802	5.326845492845138	5.875297496916067	3.6241632255836462	6.515360936311611	5.384917686951152	5.96505354038154	4.784264739590671	5.792660825736573	3.4792041609379454	5.4210840448195405	6.12594	5.366727263429784	4.583618570295953	5.936471800027353	6.174769738312199	5.976496387267513	6.515920909837879	5.965414016677713	5.325198593898339	6.302954996319133	5.8528935285370425	4.0605299096676015	5.8887156932853175	5.7773594170392455	5.898736158447214	5.6612757183558635	5.975583579257995	5.9176119516257275	6.324239460769465	6.742125244848966	6.1690763571989855
Sescandelin B	0.021269999999999997	0.1867	1.7326	1.3482	0.8267	-0.2746	yes	down	281.067	3.5908	M+Hac-H	C11H10O5	59.5	0	3.029	0.5069	3.6639999999999997	0.9459	3.351573291460337	3.6030350810338088	1.8505844782002043	3.8000251569136614	2.8948382529466863	3.5354285497848954	2.7013303989365345	3.0968600657167764	2.5384103151769355	3.4524373920755966	3.2079157920598216	3.8003600780381204	3.068040560330242	3.3588437988632	2.651792713209219	3.668705759585927	3.990811350522709	2.4717740970718896	2.7865350574033942	2.8754333588583796	2.7523459077276367	3.1872587673515285	3.2776812247821923	5.70931986387684	3.3284785870173286	2.267738994546588	3.8131687573151916	3.722321688138465	3.8530691982391017	4.8259627009876285	3.7113257990519672
1-Acetamidocyclopentanecarboxylic Acid	0.001773	0.0917	1.7326	1.2855	0.8943	-0.1612	yes	down	172.096	0.981	M+H	C8H13NO3	37.2	0	3.983	0.4044	4.454	0.3092	4.310163793829964	4.189115019308025	4.1275380723584405	4.377418564673793	4.0740780159400085	5.001824183418127	4.035358432232232	4.763402774319669	2.9339820530269933	4.343392788264005	3.512037650344044	3.718153969777587	3.801216725973612	4.884616506339163	3.542089578383265	4.556653404892119	4.1971057660945545	3.677082651027498	4.001920388109019	4.432270180616404	4.131878359498619	3.8113200133010943	4.081131292615634	4.552251481095743	4.075751736140059	3.275479846375805	4.563045746539483	4.65219025318199	3.867033318196808	4.727047454188061	4.533130888320311
Asp Ile Met	0.0033369999999999997	0.1128	1.7309999999999999	1.1906	1.1166	0.1591	yes	up	410.192	4.1093	M+CH3OH+H	C15H27N3O6S	54.2	0	4.462	0.3747	3.9960000000000004	0.426	3.9531792366183	3.509699683823612	4.212215353665855	3.211255429162275	4.562423035995214	4.477624043569016	4.863888153543211	4.523464253637694	4.735873613472023	4.928089066250896	4.807912017714125	4.826665055186923	4.426322363061615	4.076959327146505	4.029165848501869	3.8632936892767655	4.372440305441199	4.623093816393774	4.767945094844074	4.7128256339739805	4.015228182818662	4.460253964592115	4.44967543768877	4.023195040215911	4.397193725948746	3.717020876776492	3.7773809980088062	3.4910250102347824	4.669135881347283	3.3394560435412104	3.890705723919529
Fraxidin	0.009491	0.1488	1.7305	1.2863	0.8536	-0.2284	yes	down	281.066	3.905	M+Hac-H	C11H10O5	64.5	0	3.265	0.5783	3.825	0.4894	3.2252413592819864	3.7121452528421854	2.2279585386191894	3.387192302497237	3.429406180526372	4.368244843947735	3.522633924369436	3.695751932165924	3.448433328157701	3.970919791597956	3.4081320894555485	2.8042964991442174	2.2963642501242205	4.023845657324509	2.8015089735870515	4.1424087634011695	4.349371868606692	2.8459355457902418	3.4815400712598485	3.412761412472657	3.3103318185211386	2.331322640716345	3.7676726484029786	4.04233654627359	4.025938809429653	2.1829985089751167	4.368125072436258	3.925953627211777	3.709013541563257	4.163826051152747	3.7347357915264046
Thr-Gly-Asp	0.010190000000000001	0.151	1.7303	1.1947	1.1137	0.1554	yes	up	292.113	0.634	M+H	C10H17N3O7	58.8	0	5.142	0.3663	4.617	0.6983	4.395041269951667	4.929557362759634	4.744608756636533	4.4137367944174715	5.358810958856875	4.2256564866338255	4.812827013536292	5.1042384764415285	4.809706567252156	5.396695683772084	5.394825145679961	5.379759568683802	5.081561105127227	3.8660817336714297	4.969820457670983	4.209112784340936	5.068654062875832	6.102517539255056	5.458749662511722	5.442865613786794	4.928588671255149	5.118353296692634	5.197657665494782	3.616415027591173	5.2521291616039365	4.696197793735318	3.514248403398826	4.524890938729972	5.646553274635061	4.507931484170501	4.171358358903757
Phe Pro Asp	0.0101	0.151	1.73	1.4493	1.1293	0.1755	yes	up	378.166	3.847	M+H	C18H23N3O6	36	0	4.453	0.4204	3.943	0.6136	4.2437612094877775	5.060965809723973	4.250302911958567	4.013142234008697	5.1730910406525386	4.241809183798837	4.871130956565447	4.657912042428007	4.151375189734838	4.4841474338460685	4.6586363481109885	3.6663742827900094	4.6760540847740915	4.6015733639814655	3.803267185449208	4.256555755173691	4.378146826991564	3.901880951864255	4.3462777565454545	5.0381237625250375	4.358529177047083	4.229355950879524	4.6643202868368805	3.4772363414721816	4.255509772326594	2.757008956903797	4.4660338058503575	3.7220638222939617	4.213223289202082	3.743933546514372	2.9930283147724093
Arg-Met-Ser	0.04494	0.2414	1.7299	1.2508	0.8291	-0.2704	yes	down	393.191	3.4996	M+H	C14H28N6O5S	61.6	0	3.464	0.8784	4.178	0.992	4.227052226693002	3.7256763964051993	2.380268204666916	5.125178969384583	4.458272506949394	4.331970380683052	3.5921941282813163	4.707519554983208	3.3586185379101874	3.7417842375633534	3.2698225924682385	1.8326010435892541	3.3715281819205494	4.237310099109015	2.2692054214522126	5.7717597940452325	3.1715546944906587	1.957463790026604	3.1127741041775083	3.50034270538598	4.763176430625085	4.01544507487284	4.36849577666265	5.718491316921173	4.283550587736939	3.6607329918472553	4.935320252267778	2.09814842692929	3.4246851352728664	4.455999790850494	4.7345779820004905
3-Furanmethanol Glucoside	0.018690000000000002	0.18	1.7292	1.2570000000000001	0.8501	-0.2344	yes	down	319.103	3.1404	M+Hac-H	C11H16O7	0	86.4	3.2939999999999996	0.6696	3.875	0.5670000000000001	3.6025262890528222	4.19523895785995	3.837596781255333	4.135850669528184	3.4725118222444933	5.337945281472407	3.5504606918987585	3.937713749059301	1.927303885143009	3.2207929934779065	2.519517158683437	3.8657867969216175	2.48113700884497	3.6188270206489888	3.078491943790425	4.425382482428266	4.164942386314073	2.9125690762155885	2.15437226400079	3.2820481930609096	3.7063342545291538	2.849578307551928	3.821090092657061	4.084207592343079	4.761400751576521	1.9906574334853668	4.304162705611023	4.188144232303686	3.0446060541026467	4.203902859227109	3.873670136643284
Pyroglutamyl-Phenylalanyl-Prolinamide	0.02219	0.1892	1.7282	1.3848	0.8382	-0.2547	yes	down	353.158	5.0331	M-H2O-H	C19H24N4O4	0	49.3	3.486	0.6375	4.159	0.9167	3.710443256423517	3.881167368874148	3.953629005001067	4.156988568805914	4.571242917944458	4.962308977581911	3.126303260619197	4.391316874616025	2.2952033724008065	3.763737362709992	3.231531193785856	2.3726836137484164	3.8739920530931435	4.311862747871945	3.39928140065368	4.445183792490572	2.8824334021814577	2.7106371435836603	4.089372576723754	3.4448703534321417	3.6799671180359983	2.9641401358146826	3.8921761011180585	3.991593305128277	2.436797057830145	2.8801001485445767	5.079708763358661	4.8811429053109725	3.9312007115722856	4.574469914340692	4.689774516799552
Isolariciresinol 9'-O-Alpha-L-Arabinofuranoside	0.01927	0.1819	1.7273	1.2381	1.1209	0.1647	yes	up	531.158	5.633	M+K	C25H32O10	0	57.4	5.396	0.5944	4.814	0.7001	5.339582002104275	4.005680889417189	5.30961418413977	3.927665076893524	4.571684536409792	5.4079379827288525	5.529342704352472	5.1650172827188365	5.792863523384455	5.2099671148530415	5.253893994769825	6.4876439592456165	6.246142602858896	4.3330279741657565	5.268148125872883	4.058186040204397	5.024124516946261	5.802921189030961	5.994493342745218	5.536506270119895	5.842551367560482	4.606542482383707	5.533184690544744	4.669333441372702	4.615351589409474	5.035743156771857	4.081519357975114	5.273792889179545	5.439997723303932	4.051206543122476	4.040662709835517
1,2-Diphenylhydrazine	0.005675	0.1306	1.7259	1.2863	0.8513	-0.2323	yes	down	185.107	4.5589	M+H	C12H12N2	74.4	0	2.971	0.3615	3.49	0.6084	2.5661300409184418	2.890627395870685	3.5054803469642297	3.716509058294757	2.667536984446516	4.189586189861037	3.087568382319402	3.46974782110546	3.011703923198964	3.4889523690384445	3.231906161990958	2.6100215443902965	3.508721816762512	2.6702920973877653	2.663405890813714	3.9991792924801146	3.4339681819837797	2.736231164323101	2.716812399891336	2.7777255228326103	2.534247555933122	2.6158295849488	2.9402071498621667	2.9119007232666827	3.248473351220029	2.4545320924095684	3.6530251313535684	3.3652472706693284	2.9057526391210766	4.3069740823299245	2.926851137406264
Phe-Glu-Asp	0.0237	0.1923	1.7225	1.3437	1.16	0.2142	yes	up	410.156	3.9807	M+H	C18H23N3O8	36	0	4.458	0.6475	3.843	0.7734	3.4911846625937386	3.1539003970881256	4.032706494795062	2.571666008120877	4.691381452676098	3.6409897048243685	3.7934797280697103	3.7484304205234817	5.187354022524275	4.557121736911354	5.117533321709035	5.175893038168916	4.518051000144996	2.6644711518692104	4.855789836222188	3.14858880374736	4.308044846473913	5.185251829020124	5.094459697418653	5.037700362245988	3.77945301338769	4.887241901595271	4.0831842441992166	4.348065835067199	4.534455095860257	4.6939988181019165	2.725188062031213	3.638912977378818	5.249866609711472	2.694931758889361	3.9312129049826408
Asp-Val-Phe	0.0036869999999999997	0.115	1.7174	1.1896	1.1165	0.159	yes	up	378.167	4.7761	M-H	C18H25N3O6	79.3	0	4.36	0.363	3.905	0.43200000000000005	4.052696239468037	4.030731821622409	3.79404607697829	3.09958951444893	4.397472527454898	3.9950564590809305	4.428504982477349	3.6777696426947255	4.835763529318106	4.725230746231969	4.8092825744446035	4.474849402568284	4.4180447343423035	3.60525016017016	4.000223547600815	3.0883765059895234	4.29095412362387	4.433211434458655	4.728247787082687	4.6093832540801065	3.8405629725362593	4.761362936636063	4.534114952833021	4.1059746419235985	4.128250605053455	3.68699170343163	3.9304150671360407	3.5515127550771677	4.815801274363821	3.6873202093033552	3.978298519861657
L-Methionine S-Oxide	0.004001	0.1179	1.7154	1.2188	0.8999	-0.1522	yes	down	164.039	0.5792	M-H	C5H11NO3S	37.3	0	4.2780000000000005	0.4291	4.754	0.3855	3.7670812745910083	4.898687886760071	4.466801882864164	4.867991127201714	5.171342991320866	4.775274960510711	3.911021373229669	4.504739626762482	3.5479585337765216	4.3091138597752	4.287102437951621	4.140766310917766	4.036279679086998	4.570291820005535	4.9284306941712375	4.6869352856837985	4.384100066990039	4.174601518084116	4.0935911979385935	4.527407847142071	4.0010299482286165	3.659246010621296	4.466510737554038	5.031132017899422	4.555482024926747	4.6194517329736415	4.9941450664191125	4.395240994233717	4.282681000710118	5.0590279679943135	4.915109951633903
St(24:1_O4/16:0)	0.01377	0.16399999999999998	1.7135	1.1945	0.9196	-0.1208	yes	down	629.513	6.7944	M-H	C40H70O5	37.5	0	5.528	0.5629	6.011	0.3707	5.75078680724033	6.133116922894407	5.4005950052577605	5.4228229305835605	6.596362054294615	5.768518419553307	5.5192248475690535	5.296332844734953	5.3327760536912105	4.567670908636824	4.913559381729962	5.5165550987841705	5.567148816886647	5.592365103153057	6.238889860981637	6.810117887162856	6.4504291668946525	4.7863162950494	5.809152722888869	5.677428280336898	5.276347766147907	5.494961032044878	4.713364977525972	6.136319626811707	6.130291813292861	6.014443830439688	5.572505606020516	6.767372158172605	5.4987210322715425	5.7564743850116695	5.9833745004394014
Asp-Ser-Leu	0.00247	0.1029	1.7135	1.2097	1.1048	0.1437	yes	up	332.146	1.8099	M-H	C13H23N3O7	74	0	4.745	0.3422	4.295	0.4057	4.4142155857905125	4.4755201668886055	3.933685679115429	3.6544122093970888	4.8227175637636295	4.4725685922537615	4.770743512367086	4.356617547617459	4.86960048102631	4.940769183037276	5.0087473102553535	4.869637964034563	4.819385659341863	4.269934720230364	4.459721634702412	3.3799524481815117	4.61262318976181	5.587373303229194	4.827858914183336	5.0539791346042335	4.5907012441796375	4.853517762296797	4.881556568561597	3.970961547481493	4.759828279998856	4.173149201596582	4.043357095289787	4.1383952387969565	4.907243548320881	3.621304290426557	4.3872052987654735
Lonfuranacid A	0.04239	0.2361	1.7106	1.6211	0.8712	-0.1989	yes	down	243.124	5.0545	M-H	C12H20O5	64.1	0	4.4910000000000005	0.7443	5.155	0.9926	4.507633896463017	5.9912450235420565	5.1302221941017185	4.382213897252671	5.350072386025753	5.587658624402188	4.786793991700328	4.410166345004812	3.167120632106249	4.078367824886176	3.3751575505768003	4.197952544378078	4.869636311902743	5.073312925669846	5.318930375157592	5.4031230866452775	3.833300882077834	4.541598683375168	4.490346181386316	3.4396518465360804	5.106923468981536	3.896427366168768	4.84320217928347	5.4204094761843225	4.537734067133372	3.759080880117264	6.734547299662937	6.018634035754242	3.595942375804829	5.892658740131282	5.621794898505028
Trans-3-Feruloylcorosolic Acid	0.018580000000000003	0.1799	1.7102	1.1937	0.8859	-0.1748	yes	down	613.386	6.6998	M+H-2H2O	C40H56O7	0	49.6	4.402	0.5956	4.968999999999999	0.6503	3.682833067344178	5.518490164301584	3.8053059205331934	4.9523476213684265	5.237793966678309	3.855534857439463	5.112779179958539	5.171609386814262	3.6603329084409006	3.8594955535243334	4.97803821920426	4.094729488168468	4.5276443263976685	5.086755784445153	4.265188337633786	5.290376354230594	3.850491842835427	4.168670709495611	4.039595493957445	3.8948495697295655	4.926585129400884	4.1526669112922905	4.685627860145902	5.3152290729958365	3.740444456328875	4.135690419907042	5.709714930593318	4.89584822161471	3.86381086210347	4.8359249968597195	5.758451544888184
Leu-Ile-Thr	0.03288	0.2151	1.7097	1.2779	1.1548	0.2077	yes	up	344.219	3.905	M-H	C16H31N3O5	90.9	0	4.341	0.6151	3.759	0.8297	4.1601975006980485	3.714542735376096	2.603681806299464	2.7624686737505764	3.951630280570029	3.9941746794550257	5.211430805491687	4.397640745984735	4.481741501000413	4.64404584356253	4.313671975433731	3.7454856178731735	4.593114851683528	4.240644969457128	3.5166515308566986	3.0748734453090067	4.7343516574937885	4.434609521136976	4.892505677239488	4.840705927607678	4.641935540684342	4.709360389027592	4.890183236709143	3.2973357013132505	3.9634634774380966	2.765443151500966	3.7954826025723687	3.770300465576664	4.8594500169431605	2.766783440074543	3.1197755057442462
Typhasterol	0.01351	0.1628	1.7085	1.2855	0.8912	-0.1662	yes	down	471.344	6.6038	M+Na	C28H48O4	0	79.4	4.3660000000000005	0.4559	4.899	0.6749	4.861518727172448	4.8487398607083865	4.852098091377732	4.849070936514651	4.956922421954223	5.513480390540451	4.970519361119507	5.034200409592003	4.022657323919757	4.476594418747165	3.817476710671612	4.191265579302306	3.650712765309614	5.608059132667068	4.207866730915861	4.755240374722216	4.66960683086548	4.396762768521879	3.8134291179459714	3.8744427821411933	4.0849598363046375	4.201038464524284	4.01765199986391	4.673614677863943	3.948199876114016	4.1553450261669855	5.490424086724935	5.341587899328816	3.8434042717368215	5.362392268700528	5.14818785184359
Fluphenazine Sulfoxide	0.01069	0.1527	1.7084	1.276	1.1524	0.2047	yes	up	434.152	4.4449	M-H2O-H	C22H26F3N3O2S	0	49.3	4.083	0.45399999999999996	3.543	0.6495	3.6384905783640136	3.8148615698536235	3.1826136201590134	1.956668995470407	4.115767823216487	3.6294882473758734	4.036590012648813	3.1667430246327823	4.664323477422628	4.520567257865253	4.650089573867928	4.411227317825671	4.2987220667557615	3.641574606302024	3.8126093321164602	1.645202994835392	3.8506821147149517	3.9407222381529614	4.624434303431326	4.361916108816536	3.7583891263775207	4.3857747265845575	4.340187306079383	3.8322914883442767	4.182849932406122	3.7023456460499413	2.7775466472434136	2.832558160810045	4.581677687821005	2.7773088103891084	3.8532279220101366
Tetramethylchromanol Glucoside	0.02089	0.1859	1.7071	1.3383	0.8666	-0.2065	yes	down	381.192	5.5621	M-H	C20H30O7	0	41.8	3.95	0.6138	4.558	0.7644	4.333344282805474	3.7513411658996247	4.745379582614398	4.499158645671462	3.9203108649139873	4.8308415453276465	4.475007605925195	3.957449535472616	2.373791449839374	3.868123109767746	3.461754072558421	2.992262908444962	4.615784031215285	4.169885090663829	4.6219413738562585	4.350649335267212	4.357878207932108	3.717910895533482	3.326007978854539	3.7345105964797836	4.488943051133647	4.394565315268694	3.9197803568959935	4.937711949698447	3.889695617255384	2.5850914666576505	5.2985786091094855	4.83718631627116	3.5190857156149162	5.072207575617459	5.440280827437442
Indole-3-Carboxaldehyde	0.020730000000000002	0.1855	1.6978	1.3017	0.8959	-0.1586	yes	down	146.06	5.5849	M+H	C9H7NO	99.3	0	4.717	0.6093	5.265	0.6047	4.6657936016558	5.645981625827657	4.677961701189796	5.8433300338065495	5.842427303518384	5.085543888108285	4.721657088666472	5.001837733669929	3.8510495224040775	4.0751714078173675	4.40987969280449	5.075507151096692	4.754512750365417	5.458151138564485	5.029611516278992	5.810927905163847	4.894991970618704	4.839368360017682	3.7961419683003883	4.619413146324501	5.240503936850549	3.420141467253442	5.067782731807623	5.8470880116581725	5.004119856794909	4.883655424070444	5.5664569841139295	5.3697770042003405	3.6637386095065967	5.790671554234318	5.305218906219742
1-(4-Methoxy-1-Benzofuran-5-Yl)-3-Phenylpropan-1-One	0.03172	0.2118	1.6935	1.5343	0.8544	-0.227	yes	down	281.117	5.6703	M+H	C18H16O3	61.3	0	3.985	0.7606	4.664	0.8982	4.429245534115473	4.0197884187899575	5.362896038219926	5.159465501807159	4.178642754812453	5.693170250570871	4.616813383722223	4.856692350933273	2.663379320445073	3.986207929639451	3.083506016082799	2.7297555499791875	4.823255005073039	3.2514168846208564	4.757813540351036	5.329653584518862	3.3472114509313453	3.8305545461944095	3.4132268167267186	3.931664602577424	4.222871546378982	3.1237595751269103	4.341720548836366	5.286998310434215	3.684422466336319	2.5741552303789303	5.482784697620208	5.165798248732999	3.8432684640056562	5.386277239697481	5.22665915130858
N1-(Alpha-D-Ribosyl)-5,6-Dimethyl-Benzimidazole	0.01315	0.1622	1.6924	1.1662	1.1274	0.17300000000000001	yes	up	323.125	4.5784	M+FA-H	C14H18N2O4	0	51.6	4.664	0.6072	4.137	0.4087	5.16437901420608	3.5305341762404643	4.5405224277091065	3.8036882607088653	4.200516056367841	4.1274687594751285	4.532121925280316	3.4269037590556475	4.230570860150261	5.6744471426228325	5.17195992617445	4.229037332565786	4.4694201499824	3.758388880028069	5.012528502117291	3.822511303371914	4.724490257376167	4.5487889889382185	5.167740419239252	5.519501524319639	4.29628451066327	5.174891584465317	4.993242731861524	3.958926129951765	4.122749033019734	4.611489632507955	3.853691222041964	4.337298255863338	4.785816523220839	3.791654999287581	3.68688861596818
Ganoderiol G	0.005788000000000001	0.1306	1.6895	1.2203	0.9204	-0.1196	yes	down	549.379	6.3089	M+FA-H	C31H52O5	0	54	5.922000000000001	0.5026	6.434	0.3976	6.1506790216617455	6.022901940969003	5.633970027707496	6.652126030441472	6.2645517980737	6.610736199066807	5.615767137410911	6.200933753825117	4.45147769119094	6.178783572534156	5.597815994042271	5.7638811316861975	5.684315080476414	6.459944012154407	6.463680663503811	6.810186332764256	6.486997638422924	6.316768579019637	6.001789680684452	6.221132211755058	6.24778747765589	5.094248487246298	6.1273637701998425	6.5117578285686974	6.204257911131287	6.0191541502520725	6.9656770373385655	6.684351173959029	6.000755956297183	7.056915664544535	6.481434366677724
Ketoisoleucine	0.02975	0.2066	1.6882	1.6187	0.8419	-0.2484	yes	down	189.077	5.2204	M+Hac-H	C6H10O3	71.3	0	3.162	0.7189	3.7560000000000002	0.6798	3.633087719185133	3.4915769000600614	2.2377241095324907	4.025011575929248	3.3795692458388893	3.568533454335473	3.3770934503037937	3.5013218128822587	2.146862793589557	3.7061528718082553	3.099515474054636	2.50014375154368	2.5907522147756983	3.5103701878029887	2.2190876896466545	4.717137888827175	4.220536121978334	2.5930671339516627	4.1902392889306626	3.131901240521728	3.5370291674340244	4.327068337085985	2.200174776252984	4.415094864764028	2.071203776127992	2.954648935775723	4.129687113308279	4.030954799420662	3.893831812486505	3.068833481504209	3.6842317113667673
Phe Ala Glu	0.009722	0.1506	1.6880000000000002	1.1273	1.1102	0.1509	yes	up	366.165	3.4731	M+H	C17H23N3O6	52.7	0	4.673	0.2686	4.209	0.6522	4.5604790270205	4.537871521577089	4.589382111203636	4.23638023524714	4.653127922504686	4.6657484665728335	5.094594140319058	4.5101890723877185	4.654453729010536	5.0078999582046935	4.920343278359319	4.297813285459934	4.629245126461456	4.819202465095799	4.042134453500994	4.169516739506073	4.814995287003867	4.675277159371124	4.893623840731649	5.088869814462496	4.377930805237309	4.6486253589748765	4.7835789386135525	3.5245101799351173	4.349675251635992	2.878484863489976	4.5182301229746935	3.5223398759192994	5.18201756947178	3.5311640648571254	4.276755206545256
Ala Leu Glu	0.01746	0.1752	1.6831	1.1179999999999999	1.1179999999999999	0.161	yes	up	332.181	2.9328	M+H	C14H25N3O6	67.6	0	4.755	0.3328	4.253	0.7671	4.553324813813209	4.321037334855826	4.55356701725017	4.143071879333763	4.779292781750409	4.7557755105183634	5.443463228576831	4.492033066328674	4.667723759902044	5.037683188758219	5.026492944386412	4.347333502956379	4.941622627726368	4.449732636173271	4.021085535271894	4.129691101482054	5.0302928081781655	4.824036376812202	5.079427733115899	4.8625872986218965	4.565757412954515	4.932620395889259	4.8750601824850115	3.4594392704893275	4.656508793311735	2.5646564128298994	4.319345900592092	4.251707360271102	4.876809887518227	4.193775743624942	3.576319730279532
Trp-Gln-Lys	0.01175	0.1571	1.6778	1.6673	0.8966	-0.1574	yes	down	459.238	6.0107	M-H	C22H32N6O5	42.1	0	4.901	0.4394	5.466	0.7348	5.0880162986543045	4.8524064709295125	4.605177424667367	5.514716645927894	4.950051841668473	5.522369772383351	4.487022442123736	4.915595329296169	3.838851849572573	5.0646893630360035	5.1581890023919685	4.725587665465006	4.242917174294466	5.25164029203254	5.567938947160085	5.654190402521205	5.449669458529336	5.24065708249773	4.6818937425969525	5.549728160660097	5.224487015481499	4.693177815449733	4.786274448813054	4.9139203959703535	4.610965604673707	5.286173685409029	5.221532397084169	5.184172597322638	5.608494875640948	5.699803343363556	4.909142188726203
4-(5-Fluoro-1,3-Benzothiazol-2-Yl)-2-Methylaniline	0.03186	0.2121	1.6777	1.2044	1.1377	0.1861	yes	up	515.122	4.2471	2M-H	C14H11FN2S	0	43.3	4.8	0.3933	4.218999999999999	1.018	4.517031055212073	5.212572338125846	5.0864659235970295	2.1134668524624955	3.8689697832127496	3.7906233126979916	5.226403530847991	5.039068245672818	4.620683967935901	4.707930582692447	5.095717866419187	4.5374375102281705	4.641498756340448	4.0729394152002545	4.4319929112913234	2.102332340974553	4.61373030107958	4.914129532024576	4.190052442260862	5.3895069326382	4.881689914968949	5.026735545129503	5.203536905295358	4.713809942334688	4.58865780203971	3.6119115424705286	4.826517327160416	2.0928054531199316	4.8564681800402685	2.5556430743716487	5.035567871059243
Vanillylamine	0.01169	0.1569	1.6773	1.3307	0.8703	-0.2004	yes	down	198.077	3.5424	M+FA-H	C8H11NO2	0	46.6	3.47	0.4819	3.987	0.5788	3.692027723623524	4.145901859357223	3.151436069825801	4.8435123837172895	4.306610909465963	4.272699558450096	3.3328983029821613	3.722930407169925	2.7071725119555152	2.9968212934461738	2.384539358487891	3.3580006425168683	3.389876359474247	3.9684826060913014	3.9783270677668026	4.405480501109003	3.629048657876389	3.6131519912340804	3.13693133681578	3.4590027048280514	4.043486218641632	3.3003736879774173	3.5861508986832167	4.417745362371344	3.4906312210531945	3.862847638962855	4.806900264102545	4.1462880644506415	3.0789591296577696	4.506813103336663	4.0179611001543565
Bucharaine	0.01214	0.1585	1.6755	1.2379	0.9009	-0.1505	yes	down	376.18	4.9207	M+FA-H	C19H25NO4	62	0	4.838	0.5551	5.37	0.5119	4.9789765787828735	4.927933041327486	5.403671139775053	5.5371731431944795	5.7383502751036914	6.287824042589064	5.088625151390613	5.3625572751538835	4.0881595893833325	4.510194212564982	3.814335413493698	4.622043653754645	4.049986806946223	5.551408842508931	4.767608818747631	5.176528565163473	5.1573822227810435	5.265817988302372	5.071888612882227	4.267633492613834	5.671918307564452	4.291607235067073	4.846005444376671	5.559448906778425	4.415275297960265	3.334972556978977	5.537440344836319	5.439292085766968	5.146337863314564	5.82537982429996	6.216801319872599
Phe-Gly-Met	0.003007	0.1088	1.6744	1.1887	0.889	-0.1697	yes	down	352.13	4.6693	M-H	C16H23N3O4S	61.5	0	3.66	0.3612	4.117	0.4141	3.4944238638979037	4.131238963418654	3.7678688313050417	4.246356683866689	4.268440400288782	4.380208228899666	3.831075325593448	3.918753091294268	2.6562757192158184	3.8527752425386894	3.457700374487584	3.595342167820267	3.708611626076463	3.7490473775844646	3.32553449351905	4.425417519384295	3.22864832173661	3.5784577655254504	3.5684481962047343	4.060007791725643	3.857276214991209	3.7061548384657614	3.5364886074522617	4.427622623727999	4.042934222955029	2.7202025002585817	4.596237991966572	4.356378814971196	3.2610601297362365	4.249140837544523	4.158733143729932
Demissidine	0.004382	0.1223	1.6740000000000002	1.2324	0.9199	-0.1205	yes	down	463.343	6.4262	M-H	C28H48O5	0	74.5	5.649	0.4558	6.141	0.3903	5.8648212517018665	5.830648783626343	5.64572706421114	6.347777444763192	6.187779178865041	6.41711683342433	5.619361466289531	5.9228907737796455	4.349879622418805	5.574783319185016	5.397115168383629	5.036497017786964	5.3845170362710615	6.176774283171826	6.229002571131168	6.63694223323791	6.002473193110794	6.016966171806241	5.4588464193842094	5.826533700268282	6.08088277197055	5.163973011805774	5.7299458772084275	6.214864446431701	5.6929942907393345	5.666656865671783	6.674344974734647	6.472928286820671	5.74729667912553	6.531273396936941	6.117755763348743
Dihydrokaempferol	0.04401	0.2391	1.6714	1.3039	1.193	0.2546	yes	up	287.056	5.7171	M-H	C15H12O6	92.5	0	3.6660000000000004	0.8682	3.073	0.5537	3.454965002515679	2.8361993766676057	3.9381105419766937	3.052095050852787	2.3504635845570645	3.375240792519504	3.254570569470119	3.005164057710793	3.5934682573654366	3.545255252305708	5.7096349998254095	3.4641121092119063	3.341793665641647	2.200330857016726	3.659449463484621	3.4224306004717984	3.5496695268203418	4.812904338746775	5.582887271948792	3.4483882693120105	3.8238410725717977	2.662927584231217	3.6268656535148054	2.4009673264867715	2.9308555718723057	3.3784267297403376	2.834163208687519	3.1648911357378737	3.1555489222642468	3.8065497928207686	3.060212922357589
Val-Asp-Met	0.04325	0.2375	1.6713	1.3525	1.2114	0.2767	yes	up	362.139	3.6174	M-H	C14H25N3O6S	63.6	0	3.661	0.7767	3.022	0.885	3.523497281993921	3.1075299677209105	1.235150551921853	1.4482301453199011	3.820549070943275	4.456271655352071	4.078161258484968	2.5829459122462417	4.457569829378953	4.230027872780334	4.223723623808562	3.832565830934727	3.7790875694678174	3.3679802649265023	3.0807327949501384	1.3756915379162915	3.4758536811010057	3.5610985027716544	4.6001173643345465	4.203663679053439	3.586468304502646	4.226332755000688	3.9567139660588815	3.2722248647577965	3.8199803602255593	1.1926743442101837	2.5492967779855533	1.3664965837199852	4.099424907520798	1.3905924277037416	3.454322945666815
Leu Phe Gly	0.04989	0.2506	1.6685	1.1738	1.1718	0.2287	yes	up	336.191	4.1842	M+H	C17H25N3O4	42.2	0	4.031000000000001	0.731	3.44	0.8615	3.728285256260167	3.5868721967889674	3.4545657703279717	2.097873809301593	3.7373229735662257	3.0218918084080584	5.3053359060980565	2.5091627296994807	4.014647741426324	4.523444677588564	4.708943157103742	3.43808998816621	3.957981543836442	4.895733720722242	2.8307299950105898	3.162330744349805	4.492099116944946	3.9042957226399047	3.616618916028002	4.846432472270466	4.30564561722377	4.58835730486914	5.041520870322716	3.0751666715674437	3.729191673825457	2.760800324420852	3.8249565979670175	2.4820622871989264	4.471985702921239	3.1307604157867877	2.183402360066029
Taurine Glutamate	0.044469999999999996	0.2405	1.6678	1.3295	0.8076	-0.3082	yes	down	303.007	4.076	M+Cl	C7H12N2O7S	0	58.6	2.7710000000000004	0.8569	3.431	0.8429	3.433786823006717	3.730109438052114	3.4443756463520896	4.212394452966096	1.9031858665385943	3.98158673726309	3.8356613614797612	3.604671730881337	1.5672385404574165	2.6058909662976317	1.7510547239872427	1.6431454259795184	3.302971590907392	3.8140403953013684	3.0177328215947545	3.9259577713901366	3.5019378858455568	1.764409131401885	2.6931275739674336	1.8861600433523773	3.5885475802479547	1.775862121575147	3.603925365191642	3.916556037586445	1.7061498278695768	1.8898204791681965	4.088224870272315	3.6530415861959833	2.2159466941278465	3.743271647208621	4.088856855664231
Ile-Ile-Asp	0.018869999999999998	0.1807	1.6678	1.1412	1.1069	0.1465	yes	up	360.213	3.7558	M+H	C16H29N3O6	78.4	0	5.249	0.3853	4.742	0.7496	4.769230334421974	4.615444083732658	4.891127545528684	2.9391236386797988	4.59545123513813	4.94961152166712	6.020997503229794	4.972109861998249	5.355964373492178	5.588900397428577	5.477659649631229	5.2531999928743085	5.360299024385228	5.1246022432993685	4.768047277403982	3.422174331446884	5.648009416763263	5.569945134875264	5.342555744233435	5.273406338238998	5.247997621187551	5.524246253474578	5.454799644954004	4.2485861324969045	5.315203978288195	2.8159586678832387	4.532207595899014	4.921903585082223	5.320376233672058	4.274546935192034	4.448655815420625
2',3'-Dideoxyuridine	0.0008672	0.06277	1.6668	1.1815	0.9271	-0.1091	yes	down	211.072	1.8153	M-H	C9H12N2O4	0	54.7	4.937	0.2632	5.325	0.3123	4.720311327123973	4.9232122333148425	4.497676794311102	5.347363085863012	5.425528141961154	5.162942542254446	5.3369437076806685	4.966661040905999	4.756831204983117	5.124239240355202	4.7977084431974735	4.816905423280606	4.695492710171622	4.490850810343767	5.0953000366897205	5.365636990415228	5.485001384812863	4.923203059584182	4.737696074851253	4.96504031886246	4.9193446050137295	4.9694862783238	4.654566743413973	5.428380587504496	5.317325529644809	4.75172682410541	5.416475994724416	5.1427764259837225	4.87515802210196	5.6606385434825714	5.503027903180653
Ile-Gly	0.002983	0.1088	1.6656	1.1261	1.0983	0.1353	yes	up	187.109	1.8153	M-H	C8H16N2O3	72.3	0	4.681	0.3255	4.262	0.3886	4.526759338864354	4.175635248115249	3.9874659882537298	3.6670682425908487	4.442201758007776	4.755030260625611	5.0335878125768	4.577333261818644	4.725438165522805	4.997684295012525	4.841472791091562	4.890401888230711	4.85773112266375	4.355762228222462	4.185338853123417	3.8997445073202894	4.668218041506912	4.772915713093494	4.459548960516359	5.182092710903047	4.635595473494267	5.032637337908356	4.948007555689678	4.070143870104566	4.3751274328651055	3.934586137038797	3.8792104538520698	4.146960720400188	4.653631824939722	3.841423060653581	4.199864359949953
Thr-Asn-Tyr	0.02982	0.2067	1.6631	1.2602	1.1588	0.2126	yes	up	395.155	3.5531	M-H	C17H24N4O7	36	0	4.4	0.4822	3.7969999999999997	0.9832	3.5461668250406824	4.428933134737835	3.0350909158939987	2.2390998503512978	4.9689667586260375	3.3784150087216003	4.587974289852947	3.81867471160997	4.782890468336307	4.5238403434209165	4.929592269390077	4.355603597419513	4.525107248056019	3.6260855450754206	4.408011334583916	3.252116098290152	4.487968589114517	4.762927496972097	4.596377247546301	4.783159793439738	4.107857139555522	4.557537674171998	4.385673269845934	3.982513981829799	4.4902092360237145	4.1108941183233805	1.3895456435160545	4.0224359036996935	4.902735668809059	3.648154615739025	2.5512180540667866
6-Bromoquinolin-2(1H)-One	0.03688	0.2235	1.663	1.3236	0.888	-0.1714	yes	down	223.972	0.5704	M+H	C9H6BrNO	61	0	4.599	0.7203	5.178999999999999	0.7152	4.538215378748392	5.692434553281788	5.1710384223548616	5.62259100157512	6.076446312857702	5.792529913255981	3.3787634492847425	4.727500185265035	4.894294668962296	4.248051567436017	4.9528052856493305	4.104497413583035	4.186184690751758	5.756431437087366	5.3526638432090206	5.81246835783018	4.5569268805222665	4.134756616839153	4.964074205419556	5.061397183834033	3.7688802802431534	3.445293084068458	4.1293518175721475	5.751858060130194	4.412828774431637	5.313403217118578	5.723659960675226	4.602589936965853	4.137590270802177	6.0101044357416615	5.5162437944173455
Val Val Thr	0.02555	0.196	1.6626	1.1003	1.1055	0.1447	yes	up	318.202	3.0186	M+H	C14H27N3O5	61.7	0	5.29	0.3591	4.785	0.8246	5.211949068597848	4.788428415255987	5.035160934666474	2.9007769816246136	4.77606142137233	5.121545166985685	5.973154866365221	5.283751615654974	5.251977672287857	5.537621992796134	5.2767709818283866	4.953305580319358	5.321699091390508	5.535434614088214	4.5410898532979385	4.362248123843671	5.5945977033670165	5.332607449204108	5.392359040606598	5.763654054165947	5.431821300608092	5.324815072260713	5.713015824130912	4.236429520763311	5.0213829609159255	3.10175948785065	5.090115760067273	4.596756922205736	5.462384815420908	4.031584558635188	4.371138042297306
Isocitric Acid	0.02226	0.1894	1.6622	1.4128	1.1353	0.1831	yes	up	173.009	0.6271	M-H2O-H	C6H8O7	75.1	0	4.95	0.4804	4.36	0.8833	5.317426103117237	4.234475205934661	5.072258041829682	4.8456339064213365	4.245409592158787	3.908798735779434	4.500340146967247	5.48418181899972	3.7973499478877417	5.1028617172373965	5.223382530387253	4.9429141738217695	4.71642182152025	3.194709689119052	5.644452150432987	4.071469301101899	5.511285076980994	4.893435622884017	4.86209374226155	5.069500671198316	5.254675668591807	5.281017490848768	4.897441901253981	3.973513361631188	4.701032896492244	4.753945920939343	3.1974831957333008	5.613986441250336	3.895465111496855	4.112694905758292	4.554774029679328
3-Hydroxymandelic Acid	0.024730000000000002	0.1942	1.6604	1.2203	0.871	-0.1993	yes	down	167.035	1.7237	M-H	C8H8O4	57.7	0	3.592	0.6132	4.124	0.6029	3.7841694324090622	4.4858919644364335	3.968411503536772	4.756393209312958	4.6632083580250185	4.000291579863496	3.6542185306163466	3.8705077050253713	2.0541637376507014	4.380339544608058	3.4064541235952235	3.675145400135357	2.696634340451072	4.243042669103213	4.025548884386368	4.434583709336499	3.2867649382430058	3.445267370016765	3.1620516564622854	3.563837516695304	3.1145717797550345	3.5190413631180384	3.483961948823005	5.123963793504035	3.638299949139167	3.919592178449592	4.200622015848559	3.9914805227994887	3.0853732221722603	4.770584514962144	4.207466234777258
Ser Glu Leu	0.013090000000000001	0.1618	1.6603	1.1961	1.0974	0.1341	yes	up	348.176	3.6012	M+H	C14H25N3O7	72.8	0	5.352	0.4464	4.877	0.5476	4.5868502747513755	5.349198753089351	4.653253430369063	3.6984105061750654	5.8006715980258665	4.652471581756182	5.479738502894907	5.065215154862456	5.5735863420908345	5.4778144823355115	6.400426207512746	5.662919977404988	5.207170064167949	4.981431276873717	4.88607001030256	4.3565090330826095	5.141681258799248	5.773641249961169	5.773295112416754	5.5651315041991305	4.900083012557093	5.292649846322104	5.102703046100942	4.823123743596836	5.195492522727309	4.640549533125293	4.650567888914883	4.49701483411572	6.020999832589657	4.338003943958453	4.1318297409595734
Leu Ile Ala	0.031810000000000005	0.2121	1.6601	1.1357	1.1349	0.1825	yes	up	316.223	3.7827	M+H	C15H29N3O4	56	0	4.552	0.5146	4.011	0.8237	4.227143604080959	3.7605024874837483	4.077533525551213	2.3655088398252992	4.311626510311735	4.20198544546283	5.536554708172789	4.222437535971012	4.52865032226223	4.882557487908758	4.698786989494069	3.668423868847904	4.627360581658916	4.233841620817526	3.835903025130055	3.0937104299649336	4.854053055007329	4.4609334304524095	5.052722451386646	5.27420213179105	4.499722786448193	4.992913899074737	4.969175980139691	4.047583554347659	4.116542967213952	3.057239508756333	4.025576333132563	3.886434919707877	4.8469922585449785	2.72340379455173	3.6595252004942496
L-Xylonate	0.003646	0.115	1.6599	1.1964	0.9049	-0.1441	yes	down	224.054	1.8423	M+Hac-H	C5H9O6-	0	42.8	4.093	0.384	4.523	0.3425	4.322912419629927	4.826454855744246	4.241733004530476	4.778182948008805	4.6709073841391335	4.943919736710608	4.086741520188167	4.442156792591412	3.37964118966166	3.9370057870940376	3.8554805687199054	3.7269614595231633	4.18608125648248	4.7555848162636005	4.34429728895252	4.794985664327835	4.331421519427521	4.186407640771291	3.808894294574429	3.880288741080068	4.181714999980023	3.3280941771323485	4.021933400042305	4.67938590189579	4.493616524026692	3.15479507468006	4.790666662618014	4.561240133647597	3.714189501014407	4.840135874055666	4.663413565464825
5-Hydroxymethyl-2'-Deoxyuridine	0.001168	0.07516	1.6563	1.1551	0.9206	-0.1194	yes	down	279.06	1.8316	M+Na-2H	C10H14N2O6	0	42.5	4.427	0.2647	4.809	0.3223	4.232815076250271	4.3625325021906765	4.008569395795115	4.7858097890565325	4.942074933775247	4.635135840767628	4.813963172262347	4.547372879386407	4.281526826264572	4.650981471217168	4.20411399377232	4.276559671849599	4.229591730938884	3.7634225489862008	4.597346466087812	4.8420184793992	4.9309730079308025	4.32641405997882	4.220517458390456	4.3739865609295725	4.4744503444023085	4.505561737680964	4.1353472818955685	5.015690904573248	4.8773048877903165	4.298321780049274	4.820204966038443	4.652843232944494	4.242060759391535	5.045013766214941	5.016555141506736
Hexanoylglycine	0.026930000000000003	0.1994	1.6556	1.2359	0.8554	-0.2253	yes	down	172.098	3.6227	M-H	C8H15NO3	50.5	0	3.218	0.6401	3.762	0.6211	3.4138730418326966	4.234748312503127	2.150811376416041	3.956930294203018	3.9238110711333576	4.113191473663002	3.4826820872176825	4.149129345084988	2.2218274519138363	3.151963913469958	2.2289711712573914	3.0526053216776443	3.272631025572127	3.91400633077596	3.4414612268373443	4.606845705916477	3.4778557940231605	2.8257231634630853	2.3947593044881	3.6746925413736933	3.889004186549103	2.882018982073424	3.273882111341663	3.838376568923285	3.4242428889096903	2.875286231072904	4.2115693365033104	4.1765548298573965	2.194413887632362	4.378264742162125	4.277139216027668
Glu-Asp-Thr	0.04763	0.2464	1.6543	1.3273	1.1689	0.2251	yes	up	364.135	0.9062	M+H	C13H21N3O9	77.3	0	4.263999999999999	0.7365	3.648	0.9102	3.854768715731522	3.5911866208995624	2.1947462057701626	2.939089121616082	4.777236388040548	3.575122053508733	3.8353481197922905	3.4278403947333587	4.668188996122232	4.536695565159788	4.892310609236602	4.901710550468081	4.418530436774874	3.889949089920524	4.139769021187458	2.8689498139035488	4.1536991080728365	5.652295244520809	4.418390745103436	4.988855028759987	3.938229289519593	4.444802809084191	4.172179725116823	2.169790528968869	4.329752267642928	4.669739593849903	3.03197998546397	4.234312916865084	5.145331668098922	3.294802386612431	2.19663292184675
3-Amino-4-Methoxybenzanilide	0.004268999999999999	0.1212	1.6535	1.3016	0.8928	-0.1636	yes	down	287.104	4.7068	M+FA-H	C14H14N2O2	0	57.1	3.73	0.4297	4.178	0.3195	4.040151515055087	3.9876833445925564	3.2258100509454586	4.1317501444250135	3.4238654934526203	4.529937074103964	2.9088849705669104	3.7470747641028015	3.4917109836604334	4.441087278783376	4.054334270256767	4.160302390850326	3.3163756805790348	3.927307919597872	3.520556486743933	4.269726150340703	4.558910575755832	3.8612954992780986	3.888251057126845	3.7020707590877766	3.1798264358311754	3.5546214148475115	3.8143313588837375	4.128861606134226	4.19826687510856	2.7549709589595053	4.42263274949893	4.195546314004319	3.7317569863306783	4.411225649828984	4.169592641252678
Malonic Acid	0.0231	0.1914	1.653	1.1153	1.1095	0.1499	yes	up	103.004	0.6808	M-H	C3H4O4	89	0	5.107	0.6734	4.603	0.3361	4.561741407035108	4.492450833582692	4.446832493126273	4.1850945921626925	4.578387969278256	4.421168186550654	4.230604169339978	4.554698332405873	4.129012651013567	5.928064551135397	5.885801724454019	4.6344213191938355	5.169954770958605	3.9903484029576237	4.873657743380536	3.987168691630378	4.702970911853532	5.833636859428859	5.655278897996296	5.756808691645175	5.7633005919467495	6.042359739267231	5.786405359401794	4.599029902414751	4.180461487851535	4.669119200541953	4.091456614533533	4.871779225321921	5.187617434917307	4.3282590503228935	4.425911709091342
4-Methylcatechol 1-Glucuronide	0.014369999999999999	0.1657	1.652	1.1682	0.8723	-0.1972	yes	down	281.067	3.2963	M-H2O-H	C13H16O8	0	46.4	3.503	0.4455	4.016	0.6535	3.3373780735853567	3.637381523157128	3.5825068952738883	4.042588348094991	4.3057334045100015	3.831562629539617	3.4460251567977287	3.952687701888883	2.491878711375436	3.1557314039316866	3.356654526535248	3.7833548787368168	3.580965096923399	3.76121340034116	3.8818910557314616	4.18697015449292	4.1578339449826345	3.0677461386826543	3.2268559170479416	3.437165309595157	3.8528091768828574	2.827851254544989	3.4745458377890035	5.661853801963779	3.8955132947231466	2.877312767473186	3.879176494492107	3.7554793697884303	3.301304992610204	4.791229815028382	4.1397829575138605
Myrianthic Acid	0.01324	0.1623	1.6515	1.2672	0.905	-0.144	yes	down	485.327	6.3677	M-H2O-H	C30H48O6	88.1	0	5.105	0.5663	5.641	0.5228	5.250841962172609	5.144044870374288	5.20100254989745	5.7410466870223305	5.899438395568713	5.873857408792849	5.049654200688352	5.840937829771563	4.235255112798872	4.942774893001835	4.640358045698005	4.41877349711777	4.827315944017934	5.7744799078419735	5.828562599240439	6.092912810944536	5.1831692773415625	4.836722376366149	4.8067899839291135	5.049328895073586	5.569507817421863	4.111169325048771	6.164132654159316	5.649509275903947	4.9850784069841785	5.3598816546520585	6.0274566973781525	5.96518488406397	4.971218845174524	6.293091158905175	5.409257489814724
2,6-Di-Tert-Butyl-4-Nitrophenol	0.001381	0.08304	1.6509	1.5534	1.0992	0.1365	yes	up	250.145	6.3464	M-H	C14H21NO3	50.7	0	5.107	0.2993	4.646	0.4275	5.1488595475595895	5.466343759694864	5.062958045028293	5.195311522212634	5.4129374501234615	5.015303039851117	5.1339100324208635	4.937524442259661	5.151823160451169	5.242441909797837	4.976203747003263	4.935786020612683	5.1642042901092085	4.532651825401991	5.109473938502303	4.860753063225029	4.998210078227896	4.119355738645034	4.96561034365533	5.189427591110818	5.4304331208765	5.5142970362612935	5.067940132856854	5.251016570301512	4.597515731904936	4.88812913740894	3.966780897671197	5.21712936757192	4.414086223796072	4.017199593264931	4.67523760105566
7-(Dimethylamino)-N-(Pyridin-4-Ylmethyl)Pyrazolo[1,5-A]Pyrimidine-5-Carboxamide	0.04655	0.2451	1.6469	1.2894	0.8302	-0.2685	yes	down	297.142	3.0507	M+H	C15H16N6O	35.4	0	3.2310000000000003	0.9779	3.892	0.629	3.4807460282006715	3.89839535847268	3.8534380758577766	3.8133182942596817	1.7352648221319371	3.9488504155026254	2.2693028595737603	4.441834513355071	4.42197069747886	3.254077019214956	3.972756039107905	3.865273012924785	2.5828256212509264	3.588937603172776	4.021345881132378	3.9014962166039435	4.394114219484174	3.0385978152261965	1.7837811422261485	3.174835014908972	3.743501157558823	1.6844505380197887	1.7704252162817478	3.630418176764612	3.9577670796146784	1.5267134045571509	3.9014962713355024	4.8994774590428944	4.315754252122628	4.137139902535075	4.067970404159244
Formiminoglutamic Acid	0.01324	0.1623	1.6447	1.166	0.9112	-0.1342	yes	down	175.071	0.6129	M+H	C6H10N2O4	0	61.2	5.138999999999999	0.5621	5.64	0.4242	5.480811938197583	6.055244622322488	5.410639199354909	5.948506511411365	5.994409944626852	5.944426404490006	4.697947959800008	5.541242576815224	4.988378682252547	4.395401970753004	5.049456625034308	4.816957765376516	4.985024335678716	6.113038907280737	5.817732469084848	6.373755865603143	4.702376545424536	5.487940302956604	5.399806713619622	4.810755127234756	5.494074196382077	3.91309683395365	4.608890434885792	6.010182727426388	5.912485726432455	5.555840707258208	5.898664692778167	5.7798434579305935	5.014605795690147	6.111086565509687	5.314996015435382
Di-Dihydrocaffeoyl Spermidine	0.0329	0.2151	1.6437	1.1962	1.1304	0.1768	yes	up	474.258	4.0771	M+H	C25H35N3O6	40.6	0	4.994	0.7318	4.418	0.6396	4.476350014503802	4.206008048343298	4.647756832952696	4.093240985422652	4.569985243390419	5.080916073211531	5.343521021890194	3.407001490420748	5.4041725733394435	4.987641664745418	4.778172882298214	6.259542324404492	4.529888934628004	3.706747057086943	4.7191021172669485	2.941388211603765	6.503010939612827	4.906427773240967	5.652262571687436	5.188123921257922	4.75435285191256	4.6782215334756465	5.882211108247894	4.438424819197639	4.89836150460129	3.9946292455935533	4.375777935920371	4.360971531570482	5.307734094567627	3.7759470808973186	4.635284863614106
Asp Lys Ile	0.01023	0.151	1.6431	1.1189	1.0993	0.1365	yes	up	375.223	0.6499	M+H	C16H30N4O6	56.3	0	5.183	0.3407	4.715	0.6104	4.8726970878116695	4.38267575469863	4.790937469237855	4.1884710183406435	5.408343086614681	5.08668682903469	5.744292707538054	4.926815663709914	5.384245388511301	5.15646075230858	5.3730595771139065	4.999599198335613	5.270203145595199	5.083133734825705	4.901438708470739	4.293707082290513	5.325243925050587	5.645986380713397	5.3193637740819275	5.700154667558977	5.055788054626145	5.004476608109654	5.206939025632748	4.049712758838249	5.0669513904230055	3.9398565678773134	4.117935584781068	3.944937775401829	5.32617611746536	4.633796385126675	4.922164350282453
Gln Val	0.01378	0.16399999999999998	1.6428	1.1615	1.09	0.1244	yes	up	246.144	1.4727	M+H	C10H19N3O4	84.8	0	5.641	0.3863	5.175	0.6076	5.316784664767918	4.7613509427302905	5.20074917584926	4.372361119417558	5.0218284170838405	5.209166851430222	5.741426829611671	5.646692506940773	5.812858212424585	6.0326077410364345	5.991550469294433	5.93607946260333	5.816809121426632	5.4929631197990885	5.069722188570248	3.4494648070433	5.874179545987449	5.733818171463349	5.7739983163746285	6.2097085814504025	5.6912612052602025	5.66142233749124	5.8920881108099605	4.945155177216355	5.720669065276869	4.452102446595887	4.925745924937577	4.712443685215809	5.773351328673438	4.774144289996431	4.796946495959546
Ascorbic Acid	0.02314	0.1914	1.6421	1.3678	1.0932	0.1286	yes	up	175.025	0.6271	M-H	C6H8O6	60.3	0	6.261	0.5831	5.727	0.6367	6.725667385197678	5.382875360134381	6.044402533672612	5.045119809384652	5.3601428038452905	5.263231847750056	6.184135013352248	6.649571943149245	4.9588389129576775	6.420920145791807	6.225928714300419	5.993980928310973	6.43729589949483	5.286661646456559	6.541247262855758	4.976558720412714	6.811034092583451	6.292900319088697	6.2181305780417935	5.7475401310915375	7.124397969464785	7.025151466684935	6.822242831777544	5.694086655807338	5.500359537564294	5.771667944821948	5.158015145708989	6.928637240160179	5.401217509800032	5.491062623892809	5.716429042130341
2-Amino-2-Norbornanecarboxylic Acid	0.01864	0.18	1.6391	1.1712	0.8427	-0.247	yes	down	156.102	5.0827	M+H	C8H13NO2	47.1	0	2.9989999999999997	0.5176	3.5589999999999997	0.7343	2.2281687898874782	3.4487249328662966	3.6323388373835535	4.687010943617136	2.476265692007521	4.193857192737337	3.2920683765315526	3.5637368102338685	2.942788615601185	2.9636307637545127	2.715908168489021	2.86679875556998	2.9010948597373627	3.9549864042141314	3.9014978384016814	3.8273347481471314	2.5175278209699736	3.37241912958962	2.82980266607131	2.4392268912424577	3.882123290326739	2.6457875047262442	2.3649175745255726	4.307801337267832	3.6541260652113055	3.1938115330103005	4.205490028413602	3.9364865591689058	2.8902655212247907	4.234874528100733	2.351922531614693
Carbidopa	0.04344	0.2378	1.6375	1.7006	1.1861	0.2462	yes	up	209.092	3.174	M+H-H2O	C10H14N2O4	75.3	0	3.843	0.6624	3.24	0.9284	3.932878987888186	3.4621414691724333	3.203009649157768	2.934928258396748	4.1375638168190285	2.9577529815861032	4.5869146869395445	2.6065789162009945	3.9998212363476986	4.123422187161024	4.326540487513001	4.152392499260885	3.70924732861558	2.837372656457169	3.843080152339557	2.985012605496571	4.8693499197462975	4.363463142159596	3.8335586847529055	4.418300987939034	2.165836026041316	3.9230068865670296	3.352244286681465	2.8078543819639283	2.254878228993112	3.68168999777938	3.490415677845772	2.817750703186644	4.678845146408415	3.9779833590709512	2.321305173156594
N-Acetylputrescine	0.0284	0.2033	1.6374	1.2518	1.1232	0.1677	yes	up	131.118	0.6499	M+H	C6H14N2O	96	0	5.651	0.387	5.031000000000001	1.0759999999999998	5.381268462162583	4.787524310886763	5.928461908862902	4.575330944268138	6.314934321815616	5.294478812718022	5.536473956063049	5.787385419771226	5.4203355249108585	5.629742214452567	5.660995079011755	5.645003652367617	4.938181169332057	5.408315559257665	6.2858789263545765	5.643838106382514	5.726148849086735	5.9073117650079405	6.125407852695246	5.749395548878533	5.481515802002723	5.510776620069024	5.5609919082582415	5.65964420222454	6.3118276539738645	5.936171094662744	3.526468175635113	4.858608641968892	4.974438669140923	3.2689732916443086	4.171723838573421
Esculeogenin A	0.04547	0.2425	1.6359	1.653	0.8932	-0.163	yes	down	448.342	5.8753	M+H	C27H45NO4	0	64.7	4.7410000000000005	0.456	5.308	1.042	4.512288446816855	5.423900424132403	4.351250508631643	4.095684765749727	6.3184639624457075	3.878417807118781	4.4855547375816505	5.017099775858318	4.717298840157971	4.685030980857046	4.495178676615515	4.560380233034165	4.768179344059452	3.9347217243840085	4.659084564584583	5.248322124325697	4.574577762140679	4.344064309179476	4.473460795024342	4.711145430804732	4.492231411664128	4.843000060545672	4.648465867745214	4.10267238741884	6.7296445202357225	5.886820639693292	6.231503587291706	5.435569549207568	4.435220196061678	3.943604021588994	5.706791709071891
Asp Val Thr	0.0036439999999999997	0.115	1.6352	1.1179	1.0855	0.1184	yes	up	334.161	1.7599	M+H	C13H23N3O7	65.7	0	5.267	0.3182	4.852	0.4107	5.0290910505615525	5.104380606146668	4.739584408398806	4.329096353018669	5.153946025238319	4.89430312794542	5.381663236858151	4.854057066244018	5.321724429162186	5.43528400070204	5.713675364015505	5.391968698202986	5.3023233452998975	4.882478011963473	4.949097319303059	4.154938531335326	5.162575324174612	6.105917977953602	5.299869316083899	5.6115151659143985	4.985085924237394	5.2338660280720495	5.2983632082296594	4.740166629057028	5.243139623571378	4.7294120156261865	4.215747746074307	4.852213582938869	5.579857217611124	4.787584853913008	4.651137467152055
Ala-Glu-Tyr	0.032330000000000005	0.2129	1.6348	1.1251	1.1403	0.1894	yes	up	382.159	3.5583	M+H	C17H23N3O7	66.9	0	4.364	0.5572	3.827	0.7751	3.559628920054157	3.9982788556241564	5.6147547412910095	3.3944203359339338	3.847715397294256	3.8070464700686495	4.512467788691311	5.242353963793269	4.411983045979894	4.453692197574296	4.733380071945922	4.401601220367952	4.533642868939832	3.762659838341071	3.1795620693694446	3.685545681541728	4.732315610285605	3.9721462365809113	4.5675823885744835	4.578218062844081	3.8911958926734846	4.3781304402594	4.310761801953442	3.0491776954671046	5.261459842301007	2.3546965252718084	3.071600222765045	3.716029945423475	4.6782053456385775	4.170069664535832	3.3480122653291837
3-[4-(3-Trifluoromethyl-Phenyl)-Piperazin-1-Yl]-Dihydrofuran-2-One	0.02264	0.1903	1.6324	1.1618	1.1214	0.1653	yes	up	315.133	6.0196	M+H	C15H17F3N2O2	0	49.7	5.153	0.4871	4.595	0.8094	5.262558271117183	4.341379485893809	5.0415291617173486	4.114361475637314	5.322480630199356	4.588515802094234	5.092828535190431	4.902121942017538	5.318781572567613	5.068844960746124	5.045908470508828	5.847113663397128	5.822715273588784	4.211598412973413	5.489555638582873	4.305038277970616	4.774378897037752	5.866264849306146	5.328543390707387	5.330205468877227	5.149426476311455	3.858091924607287	5.048311735612068	5.163215026063637	3.9384523116982995	5.508920921560619	2.9652933816851688	4.9509710299341645	5.172692146483895	4.130668222032903	3.7196183343899007
(Z)-2-Oct-7-Enylpent-2-Enedioic Acid	0.0015630000000000002	0.0853	1.6324	1.9672	1.094	0.1296	yes	up	239.129	6.1758	M-H	C13H20O4	80.6	0	5.178999999999999	0.3408	4.734	0.354	5.485716001659386	5.662670339371902	5.161041072623432	5.48825898871558	5.512519802860398	5.396507989943318	5.370624525775226	5.136607201300984	4.962386508130747	5.217621638955208	4.4987024354362175	4.867259745192031	5.389533951860787	4.877231721346142	5.261163380938417	5.014641794870347	5.003689196931178	4.515026190393813	4.7340381261467845	5.2415541581632885	5.453971552425928	5.610049766460644	5.312097057364845	5.200408631475723	4.44801425905084	4.856477967591398	4.3737920974292495	5.273748127017337	4.120047923476776	4.460422051854052	5.026979568543192
Ile-Val-Pro	0.01144	0.1561	1.6293	1.1291	1.0839	0.1162	yes	up	328.223	4.1573	M+H	C16H29N3O4	51.3	0	5.6979999999999995	0.3551	5.257000000000001	0.5576	5.415401443858372	5.3233457217699724	6.008205684805535	4.712385259201668	5.347861887156543	5.896114997910737	6.410636770806612	5.976133382933264	5.550696795161704	5.7939456932383075	5.7869372331983175	5.296312779681544	5.8072046377429976	6.065488509187971	4.970601570011013	5.4400727429853415	5.7637444485788425	5.398958572573365	5.6477681894063805	6.225475804848808	5.751586560995424	5.7318695317551445	6.0529417968931245	5.094731830557183	5.2694811294535215	4.620869004681392	5.5042038260197685	5.0493104569725995	5.691706584689813	4.675101890386324	4.6839961865436734
Gamma-Glutamylfelinylglycine	0.01319	0.1623	1.6281	1.2377	0.8895	-0.1689	yes	down	358.139	4.3608	M+H-2H2O	C15H27N3O7S	0	44.4	4.043	0.5797	4.545	0.3884	4.323104553966679	4.344732705558913	3.3713280065382234	4.433058844848972	3.813793658381302	4.915690616847077	3.5746980755292173	4.5563131349785415	3.866670106833825	4.752733692470686	4.615353420280887	4.585157585081665	3.8618948578915537	4.4650835526350345	4.120676414670611	4.676410651310891	5.066432159416755	4.101319198931616	4.195426460148527	2.9729788404199886	3.5478007129792237	2.9437362910277765	4.20205282901386	4.241163764948388	4.603609513862208	2.7699296003708422	4.684950342418955	4.474356412804491	4.2503083393758665	4.855278296490115	4.697688493481462
Fasciculol C	0.001017	0.0694	1.6281	1.168	0.9402	-0.089	yes	down	507.369	6.4315	M-H	C30H52O6	47.8	0	6.41	0.2399	6.818	0.3846	6.549395927490777	6.269797076278207	5.950856208130761	7.081121193750503	6.707003153436532	7.067144460192393	6.334381714134313	6.598267169676987	6.465590998359888	6.318098058469013	6.304271967236304	6.055284073413957	6.304409871330494	6.8838237295430575	6.902625909343008	7.226733601211097	6.724946716729237	6.650166436674724	6.1496437651896505	6.335965316747362	6.504337218550612	6.2931509220506126	6.372790518998087	6.79628143774743	6.456625776785737	6.229005168668111	7.371003885008882	7.13791670829007	6.459585480586021	7.368884800616168	6.833401221577063
Gynocardin	0.01755	0.1753	1.6261	1.6461	1.1336	0.18100000000000002	yes	up	321.129	0.6287	M+NH4	C12H17NO8	0	59.9	4.462	0.6617	3.9360000000000004	0.3612	3.5219046885382754	6.351681956922383	5.2708875713941925	4.038152286493082	4.48389165789279	3.694593208912658	5.088766655351758	3.679667126438857	4.2669245065882455	4.0965066404458055	4.906475691889467	4.395423877333147	4.138479168568853	4.04987650232614	3.9090771084400564	3.6637870063625857	4.054409433954409	4.750602791592482	4.667031632017497	4.913247669679688	4.11475278984225	4.2865172734886094	3.882954215738175	3.6192526622518413	4.264596045768276	3.409998497144581	3.6871173838513522	3.9811531349527036	4.757346921182788	3.671246639728196	3.64626599035978
Ascorbyl Palmitate	0.04605	0.2434	1.6251	1.8714	1.2229999999999999	0.2904	yes	up	435.234	6.6341	M+Na-2H	C22H38O7	0	58.6	3.773	0.9454	3.085	0.8049	4.723251085990103	5.5301997277663855	3.3271700309132624	5.961829611304991	4.829523197209249	4.522453832157881	2.9959622834563766	2.2699540837749708	3.684494279883053	3.0004200238566434	3.191399293680816	2.462871959887186	5.033457421016185	2.200190053646508	4.34309630050877	5.699239708800207	3.226546740790115	3.0687801350795434	4.301897400901903	2.8733778550030062	4.515544195871113	3.593017048249882	4.709640256804293	2.4008261925475347	3.5380143537855178	4.16902005772631	2.2955930886412275	2.255977014457531	2.9644396347959785	2.280989317788224	3.796511583051996
Traumatic Acid	0.033089999999999994	0.2153	1.6234	1.8462	0.9026	-0.1478	yes	down	227.129	6.1702	M-H	C12H20O4	91.9	0	5.106	0.6025	5.657	0.764	5.796767228684756	4.591874408301445	5.491699383647367	6.606866761776793	5.636544368212433	6.244002274982378	4.2652689413407305	4.869822322852426	4.208421471213125	5.630346004095584	4.559567993894972	5.451893505588384	4.655689613163472	5.143198787861166	4.843642525360496	6.111368606377398	6.633003939659513	5.2215072844192125	4.784842398241366	4.658791357496054	5.023832257426699	5.520358700323262	5.164147996635202	5.298572576284706	5.9106859124252935	5.078247373970673	6.1884638132004754	6.164751616816738	6.037763035576012	4.896169259502031	5.633641862327384
Gamma-Glutamyl-2-Aminobutyric Acid	0.008154999999999999	0.1437	1.6182	1.1574	1.1168	0.1593	yes	up	215.102	4.4304	M+H-H2O	C9H16N2O5	0	47.9	4.275	0.3611	3.8280000000000003	0.5183	3.706553986041712	4.072171523649256	3.96398100264526	2.4596911960808145	4.222669682703672	3.8676674476528414	4.165452397737004	3.713365660592517	4.732484561650262	4.650435785579705	4.873402890315653	4.569797119978478	4.423349394945412	3.9280456335946665	4.111776503805238	2.933501168819969	4.037271575269732	4.074237826774429	4.7450643750943025	4.43107950896567	3.7604878559158634	4.568406162522509	4.4107802750821925	3.972937970295297	4.325172675081955	3.960349223091817	3.374220486734976	3.140128084228728	4.7590964087715015	3.3347684453877835	3.7554824800804414
Neoxanthin	0.016669999999999997	0.1728	1.617	1.2306	0.9067	-0.1413	yes	down	623.406	6.4658	M+H-H2O, M+Na	C40H56O4	0	67.7	5.305	0.5394	5.851	0.6475	5.8080103183219824	5.164443319479452	5.249361048238441	5.975102457352756	5.197995802659906	6.1966265263755576	5.095008064788587	5.568302814501783	4.396881722486817	4.8992073485455485	4.657827904817878	4.880307202720449	4.775328806295932	6.156134329836414	6.003850411565592	6.358090607448077	5.8590855877614425	5.2603569713991405	4.570409855982796	5.753021561556356	6.090015860169923	5.353393128788907	6.205539216908063	5.69749962840686	4.77887594611191	5.020459469810395	6.426475773223221	6.394802898179657	5.161766802633807	6.889032348562387	5.848934180319681
(S)-3-Butyl-1(3H)-Isobenzofuranone	0.01593	0.1713	1.6168	1.1753	0.8474	-0.2389	yes	down	225.067	4.648	M+Cl	C12H14O2	0	70.5	2.627	0.4839	3.1	0.5267	2.945033943896605	3.0303252065946147	2.8157343995686066	5.2703677178485515	3.382143617278872	3.2142999583385943	2.250574713698659	2.1359197460483825	2.6523913281582834	2.937258585711844	2.803548236100588	2.380821827631939	2.096468549146387	3.0543284232688657	2.9335368145462013	3.4933372261153637	2.886058584288369	2.841654552653232	2.1973596551877357	2.584532164247975	2.316256812352406	1.3983225000159845	3.328951794273639	3.5004930869906135	3.128379656392777	2.4847805629601343	3.6571468592875247	3.1283517775547165	2.2107593271061763	3.5811957540409094	3.2298462465703124
Leu-Lys	0.03365	0.2165	1.6164	1.1395	1.1653	0.2207	yes	up	258.182	0.8999	M-H	C12H25N3O3	61.4	0	3.687	0.6278	3.1639999999999997	0.6493	2.7203903850344435	2.6085868207242875	2.353433011667534	2.5119610149725284	3.7708416719696185	3.7058754448114373	4.6866072105800205	3.7194141753951295	3.831887910690967	4.3586487240275575	3.742316438334306	3.476584218923014	3.5227805580791687	3.465723798771002	3.111103815355181	2.5007739396089885	4.070635471028849	3.91272322881764	3.4881979636159373	4.122644229074194	3.8819254462131534	4.418456017386597	4.263733123104188	2.9077153726642813	3.3339108899114938	2.3084022367197967	2.5309053695847337	2.491200989616584	4.218896518720494	2.516269981915896	3.4849186700417287
Disofenin	0.007289	0.1381	1.6156	1.1742	0.9154	-0.1275	yes	down	349.176	5.8612	M-H	C18H26N2O5	0	46	5.138999999999999	0.3735	5.614	0.5439	5.3457089554356365	5.435894084940257	5.3644221191727794	5.946569785056468	5.105989397502059	6.3119103488817565	5.027969129214976	5.209536415819524	4.1535797759024815	4.863083517636404	4.915478203920532	5.078332349218709	5.737552177334582	5.618676943045113	5.316227676983709	5.714235765013348	5.007223107205954	5.015192259366208	4.8249262479455535	4.889529755800172	5.832133830868119	5.019558226397783	5.501727980608196	6.071669571599803	4.989042218205877	4.670064133411124	6.256849206232772	6.031131735435985	4.932300268665159	5.7402545130158895	5.465174895069784
Glu Pro Gln	0.0065439999999999995	0.1344	1.6124	1.0891	1.0931	0.1285	yes	up	373.171	1.7652	M+H	C15H24N4O7	53.7	0	4.882	0.3066	4.466	0.4871	4.458584671079437	4.66195420068112	4.793637055562722	4.516904107175374	4.9343534750693525	4.754021465473527	4.787286002441844	5.230509765369394	5.109254615800986	5.132134632489741	4.978808386258022	4.912689835084652	4.78707848238578	4.5359144707423935	4.5275851516081245	4.204763575993174	4.882449050650534	4.959748359328311	4.534459155570633	5.423387326039263	4.4256327629950505	5.515491264936408	4.696176453815867	3.8242816167431033	4.751175805032559	3.227221728635888	4.338434125352308	4.842045099355123	5.276375734740518	4.485347048253688	4.122044468770425
Glycinoeclepin B	0.01036	0.1512	1.6084	1.1668	1.1065	0.146	yes	up	603.283	5.8666	M+FA-H	C31H42O9	0	53.8	5.0489999999999995	0.4326	4.563	0.5496	5.0258900985940125	5.259437609640807	4.4790754477808	3.798426863782221	5.25982056441488	4.700831624362557	4.820556044856219	4.904431281463945	5.345967220519476	5.296918831282395	4.919365394427093	4.8683375901730725	5.685966897486278	5.532320578974061	4.577873858299219	4.90977194712485	4.893392565677869	6.224877781368524	5.250961055217504	4.948732458387224	4.294366630898035	4.905945528466996	4.970375526832107	4.687751203046147	5.165156311190528	4.164712867550687	3.8385866585310815	4.1764902000112585	4.763317685508281	4.303027764871056	5.137592974673921
Daumone	0.02536	0.1957	1.6012	1.329	0.8419	-0.2482	yes	down	275.15	5.6261	M-H	C13H24O6	0	47.8	3.031	0.6215	3.6	0.7064	3.2260572050124114	4.097609571093686	3.2333014484575338	4.129263109289694	3.6662731984660097	3.964028829092313	2.289385200285701	3.312903294827652	1.124305454582308	3.106154660910671	3.151553233735415	2.717050356901745	2.8024135206758642	3.948517148813364	2.6724035588190516	4.4548534708779215	2.8318345888536287	3.014595371377012	2.826246280224036	3.713023100876964	3.450968348585557	3.1246896670205624	3.2231159822493587	3.791073694551008	3.1573531295244783	3.064887202573642	4.647596100743722	4.20865024021774	2.9299260505853284	4.152742174502449	3.731895880413612
Neoandrographolide	0.009603	0.1503	1.6005	1.2314	0.9175	-0.1242	yes	down	481.277	5.9767	M+H	C26H40O8	0	65.9	5.693	0.4744	6.205	0.5401	5.835935441636553	5.770324804489976	5.602298313294356	6.3444440014771475	5.37895794198452	6.15122738004994	4.64292476970974	5.9461031358916125	5.0069780578709135	6.120203869211975	6.304937464956961	6.145052323565839	4.9466477651946335	5.957270633859313	6.113734735320247	6.324898804226999	6.122587530999825	6.162503358546307	5.5630490144989	5.998493030767688	5.787405421920647	5.220470469620117	5.4983339801168345	5.899999288921497	5.872556137543649	5.750659859843588	6.658467198222122	5.9147270739079465	6.188809438920183	6.629843796668424	5.80667741810917
(3E,5E)-2-(4-Methoxy-4-Oxobutyl)Nona-3,5-Dienoic Acid	0.001402	0.08304	1.5993	1.1453	0.9128	-0.1316	yes	down	277.139	0.917	M+Na	C14H22O4	36.3	0	4.26	0.3404	4.667	0.2602	4.109092792088439	4.663863084859597	4.572297901558724	4.551606357322837	4.830893951322612	4.351290341321556	4.469343436259667	4.537370928992331	3.51188015499718	4.568910087828487	4.410037428136005	4.3217938240351685	4.16234373462782	4.724154951640977	4.142053340738562	5.185732222500539	4.443030101580512	4.252509888855231	3.906158355639248	4.177422837067811	4.116108575507057	3.584192007949344	4.168935738043091	4.613272618590322	4.573096708418461	4.120356543545095	4.739609354571787	4.7546064996213495	4.881082220970667	5.029732643866418	4.667680306688125
Gamma-Glutamylhydroxyproline	0.005202	0.129	1.598	1.1211	0.9023	-0.1484	yes	down	281.076	3.2425	M+Na-2H	C10H16N2O6	0	41.3	3.813	0.3862	4.226	0.3458	3.6916071884977883	4.026739928594821	3.3750046918749046	4.004944007018491	4.177727044639002	3.7231001099681813	3.787574190366267	4.353752723601959	2.9142192547544594	3.4158280287802723	3.424438577863953	4.075760862367558	4.000811221537568	3.17221294953071	4.291979090063462	3.930491220250569	4.211475725502146	3.5966189979326098	3.8217490950887214	3.8774370762594974	4.2521229097516136	3.436876028328683	3.706665855983073	4.807112019636428	4.522601318008083	3.599987571898075	4.092660082118513	4.060530895491005	3.5127672521604025	4.2515415371158065	4.6570370743985965
(S)-(-)-Perillyl Alcohol	0.01832	0.1793	1.5963	1.2083	0.8504	-0.2338	yes	down	135.117	5.1255	M+H-H2O	C10H16O	70	0	2.8369999999999997	0.494	3.3360000000000003	0.6111	2.2667563511194637	4.278764824868777	3.609724908896885	3.647871666092127	3.016697914571321	3.645218234582571	2.893445234140968	3.029511007279737	2.1433592330990314	2.9143104504613238	2.9623616882057755	2.8071715211566257	2.8297825115779287	3.2542397837570154	2.5992149377389686	3.0104068571568012	2.3153647365053858	2.3181478022835385	2.5823846795210263	2.6675339000074327	2.8885439707398604	2.6451319198314924	3.128132576517697	3.035085893577196	2.57057405690713	2.2847974990720097	4.271153233350296	3.628950551111964	2.3286221385383654	3.92126094784732	4.098475999017989
Butyl 3-O-Caffeoylquinate	0.017480000000000002	0.1753	1.595	1.2132	0.8451	-0.2429	yes	down	409.151	4.1938	M-H	C20H26O9	0	55.7	3.076	0.5285	3.64	0.7153	2.4686361145726363	2.6371931363832664	3.7304718855027885	3.9537950209286064	3.6424372598096153	4.287949852755784	2.7831697592182527	3.75885071572534	2.273199857026896	2.572785038680439	3.4737372717424884	3.271977561743932	2.4505028442619343	4.087249554332584	2.9658531809467834	3.7425191209264517	2.8012235572002	2.9388141325006063	4.107161009405685	3.3912826335159223	3.5726428448793697	2.7112343061425905	2.901359057960254	3.2269895888865223	2.5837478956348727	2.3369404655845014	4.5155260990943225	4.016116011528643	3.6255818163802815	4.437040982415874	3.955389390866147
N-[2-(3,4-Dimethoxyphenyl)Ethyl]-4-(4-Methoxyphenyl)-1,3-Thiazol-2-Amine	0.008764	0.1464	1.5938	1.1783	0.9015	-0.1496	yes	down	371.144	3.1202	M+H	C20H22N2O3S	39.2	0	4.42	0.4374	4.9030000000000005	0.511	4.217528979428772	5.618885342684711	4.2466867421887065	4.4573900283648635	4.5506984016903615	5.376941554191082	4.671508655291439	4.7671648382963365	4.267815130939023	4.732180649266856	4.5351140511650785	4.0302504096564595	4.123935357724612	4.698815322295009	4.126383540966351	4.899896002551482	4.687487116563512	5.007552753990277	3.922317551474006	4.358225573619612	3.736160776915359	4.31336026672416	4.0630211475035685	4.862078133815676	5.226216826613858	3.359155732696564	5.095831097346841	5.047624477662747	5.413327621482526	5.358525319962898	4.947145233433528
Asp-Met-Leu	0.02324	0.1916	1.5934	1.1489	1.1275	0.1732	yes	up	376.153	4.3967	M-H	C15H27N3O6S	83.5	0	4.376	0.4197	3.8810000000000002	0.7355	3.7734702413672174	3.723649595352426	4.25157118008354	2.378511225099756	4.237369987198684	3.4572165531902965	4.396432509096592	3.2375954338999158	4.6639578289459775	4.712189346315968	4.788762836504246	4.71796646164356	4.458949119181998	3.6921347457025098	4.4453177940032145	2.6377627988253174	4.17116184243078	4.631616831719592	4.818665913428662	4.782883227928866	4.237455854658813	4.492610741760208	4.609378819470464	4.311809881944156	4.462060922998283	4.462714842677032	3.3979655558260204	3.54964658787388	4.798121671612591	3.1838319799435406	4.431016353613407
Leu Thr Ser Lys Tyr	0.04381	0.2387	1.5912	1.4075	0.8971	-0.1567	yes	down	611.342	5.8038	M+H	C28H46N6O9	57.7	0	5.482	0.6456	6.111000000000001	1.022	4.734912903392118	5.858698047528511	5.951854583901133	7.309100607901182	5.5967355344896506	6.9106426471719695	6.050635368924178	6.297820048062918	4.5013797504558895	5.42430049015182	5.324113845037111	4.988905458338845	4.752904972703108	6.791080707880233	5.896055680720705	6.573838694601037	5.030316111164298	5.0641449801948095	6.4123401616074105	5.5698629320337165	6.808731540089778	5.115749264110381	4.777576378389723	7.075279741428503	4.8743242631766135	5.1421201548646165	7.1788855683163835	6.687085043386669	5.663705132918756	7.135102663563366	5.92042596553476
Fahfa(19:1/6:0)	0.00808	0.1433	1.5901	1.1583	0.9179999999999999	-0.1234	yes	down	431.316	6.5273	M+Na-2H	C25H46O4	35.1	0	5.254	0.5108	5.723	0.3165	5.623479001240014	5.631264546903133	5.12942137862391	5.871610107421542	5.831396758122778	5.90726953798087	5.597708177263278	5.4118497598689865	3.8331017890288734	5.251670888390625	5.29011536563155	4.846237393618186	4.857377693327881	5.684090234017504	5.291228773561864	6.035361917537321	5.650102302355398	5.290114234450061	4.928255249885343	5.755123884991696	5.680467305869143	4.367287659764194	5.564619852853607	5.9569344843947505	5.385557197899872	5.187546419554262	5.9080929633743215	6.311882705848907	5.494136621847911	5.5318736278496505	5.9093256170872
1H-Benzo[G]Indole	0.01616	0.1713	1.5899	1.0991	0.8795	-0.1853	yes	down	168.081	4.3125	M+H	C12H9N	67	0	3.4219999999999997	0.5123	3.891	0.4726	3.8600767834550886	4.283000832679541	3.870685464130677	4.032946357388767	3.115925862196554	4.485662731015513	3.2970601900971377	3.9071479681058254	2.8887837869858366	4.266385459271464	3.4546766499508093	2.9397952023851053	3.756462267100849	3.791404402276215	3.1966574173701967	4.3784767196521495	3.9822733946774687	2.697608422963801	3.129374541763056	3.41114797064697	2.960602234401198	2.5772305732233454	3.431846196439743	4.0102522431602265	3.902611051454437	3.0550447213131835	3.9039457511894167	3.7209346819393385	3.004741219418425	4.456171014295794	3.4534134124261184
Cer(19:1_3O/17:0_(2Oh))	0.045610000000000005	0.2426	1.5895	1.0632	0.8972	-0.1564	yes	down	642.531	6.7785	M+FA-H	C36H71NO5	89	0	4.558	0.7217	5.08	0.5967	4.296581681254701	4.828285261422213	4.88854969012381	5.1651558297996525	5.653559133417582	5.3832400152276385	5.112715965545888	4.815967935131457	4.3024005516126245	4.006655711486384	4.015221400342157	4.417395284661305	3.4601882909103705	5.454109521034567	3.5732355063446595	7.175333574283947	5.7758526677275075	4.072031989676984	3.6725638659702895	5.375716926016674	5.683969139115753	4.594413813762412	4.057569427664563	5.1307037394636446	4.326336443281808	4.776314460579274	5.795611240265273	4.705266285460667	3.9975599036396696	5.3877300416452565	5.247629316430702
Leu Val Asp	0.008287000000000001	0.1444	1.5854	1.072	1.0866	0.1198	yes	up	346.197	3.2327	M+H	C15H27N3O6	77	0	5.285	0.2568	4.864	0.565	4.8307334704098	5.140887265336623	5.108530662283169	4.1235068298534765	5.087456194402368	5.150469738495662	5.869702224925934	5.311188351172091	5.194465711289372	5.541286993385861	5.503187555595764	5.00740564154355	5.2613192121631736	5.3696618097016975	4.908947027505331	4.419025922176452	5.5959650348816705	5.5495144677137365	5.1854729786718	5.271343068657508	5.246562794531425	5.361560987722768	5.4338636307269095	4.21598913211554	5.382138266038322	3.7755556300097592	4.946122892743463	4.7712062939262605	5.169078221215708	4.3167684323119815	4.318011823608156
Naglyser(14:1/10:0)	0.01621	0.1714	1.5851	1.1568	0.914	-0.1297	yes	down	541.386	6.4816	M+H	C29H52N2O7	41.4	0	5.569	0.5916	6.093	0.4969	5.802221914428783	5.602356385390599	4.484647603482571	6.617383685151888	6.080171339131215	6.650054197469107	5.639084497688643	6.072307838031237	4.339653280478223	5.917467060446382	5.324188903577841	5.160170071334701	5.247154561213273	6.7216990921473165	6.415192817716405	6.790419990207294	6.335047068654335	5.995776951881628	4.8785014937392015	6.109035870153908	5.6877590840404455	5.019102516705932	5.692568371506495	5.971573696671691	5.672165783272022	5.055007622692688	6.706189797839545	6.308015423723775	5.839268349386938	6.9293640653464434	5.820366616677442
H-Asp(Obzl)-Oh	0.02986	0.2068	1.5847	1.2006	0.85	-0.2345	yes	down	268.082	4.0813	M+FA-H	C11H13NO4	0	40.8	3.128	0.626	3.68	0.7005	2.399849221195897	3.8092430524051832	3.4375337020180816	3.87208978072967	3.2368532879434304	4.104467408384475	2.9654777793760627	3.8846635384236237	2.13877692937648	2.43794112333748	3.83112248800107	3.8018553402109885	2.6735750537067418	3.7594334686770754	3.3417397732900067	4.071412236967583	4.293893731286938	2.817934506516852	2.366660064729335	3.292562137343741	3.2910709722593645	2.350762652107291	3.063129220517527	4.174092514849463	3.6504770192438034	2.2024022596486543	3.8746218033080297	3.644537745311289	3.5246615104363124	5.422969334732749	3.8379778041096766
Pro Gln Val	0.019190000000000002	0.1817	1.5811	1.1291	1.0915	0.1263	yes	up	343.197	3.3503	M+H	C15H26N4O5	48.1	0	5.096	0.3845	4.669	0.5766	4.8671359882718885	4.615352156002077	5.35443228616395	4.404084607967412	4.839954358653149	5.134757045927959	5.7584241529287015	5.4809769934419155	4.868128320127582	5.055925974156285	5.175498320889264	4.583071063469659	5.214439946774653	5.256894194979871	4.304481318129028	4.728482630206671	5.1081358973959885	4.975157402120886	5.041347715789051	5.8294113748505785	5.159785965920245	5.130541097040816	5.461399764477752	4.333776014340468	4.414120920981952	3.3110099391300905	4.903184468514583	4.232494013755583	5.1682124249815455	4.38852844720235	4.036964789837336
27-Norcholestanehexol	0.01138	0.1561	1.5778	1.1621	0.9198	-0.1206	yes	down	453.322	6.3142	M-H	C26H46O6	0	42.5	5.617999999999999	0.5321	6.108	0.4185	5.929846470125381	5.605262398337718	5.512190530809648	6.489167991943418	6.023786334076653	6.368338779021622	5.334373513019368	6.015595644551325	3.941710973498272	5.7222059112668635	5.264175659494555	5.4235573173263365	5.2298770490222655	6.019010303869928	6.356836219779789	6.443200924136069	6.256771198585247	6.119308985473981	5.282460339773299	5.6025985122462565	5.946302621114488	5.479884712271383	5.693619751175407	6.1011152642486834	5.776037041132708	5.394956437206644	6.759897708365247	6.4254733324956845	5.703475978470106	6.694185245682451	6.03650006514886
Trp-Gly	0.02805	0.2025	1.5767	1.1818	1.1297	0.17600000000000002	yes	up	262.118	3.5795	M+H	C13H15N3O3	68.6	0	4.18	0.5452	3.7	0.5928	3.8099709527904975	3.474242992538405	2.9478612893130447	3.1273468482229467	3.7735783625496775	4.660050426630809	4.559821631203309	3.850985901447475	4.567563389248496	4.7327054673139175	4.093593191439535	4.686581238315304	4.36761092203538	4.14192887358779	3.1686419785486732	2.9672635807431003	4.4079654845320215	4.403978304871387	4.803885415723822	4.398960581908586	4.069225131184665	4.622342112789859	4.685182774906755	3.3824376481462526	3.637615814311349	3.0741102155157214	3.099382156532259	3.4168593557979543	4.857188524743692	3.462695103943826	3.6863265449430265
Tyr Val Thr	0.01948	0.1823	1.5749	1.0525	1.1109	0.1518	yes	up	382.196	3.3396	M+H	C18H27N3O6	42.6	0	4.516	0.4062	4.065	0.6128	3.9159475058291187	4.099523598784959	4.434701476399095	1.8065389984804927	4.209549755129913	4.251076609535547	5.182237203335798	4.939351831897231	4.655888542166009	4.679456705294706	4.5810922285656215	3.694897718250561	4.52038929070223	4.525949620756914	3.8441141336150215	3.6380485014171726	4.698474792733945	4.5316569211856015	4.8301952299912845	4.992304856061619	4.403436964376871	4.727696129569684	4.862651730651087	2.9715629555355583	4.116974464992255	2.1038857755532967	4.1613129055706075	3.9329374287450136	4.7981848383047545	3.4153272617754493	3.4895586293330325
Tyr-Ile-Ser	0.02797	0.2024	1.5749	1.1236	1.1301	0.1764	yes	up	364.186	3.9164	M+H-H2O	C18H27N3O6	41.5	0	4.118	0.5127	3.6439999999999997	0.6187	3.818310532370623	3.593479435294515	3.5131927814988466	3.3506039616560384	3.671440699646404	4.226442483363158	4.9985959409587855	4.143206493088901	4.064528275944944	4.506684680421352	4.653340248822467	3.6950597044204243	4.307077220396763	4.312111353867138	3.2259083363650496	2.5041281575866905	4.272567544988136	3.424813146188223	4.494923979663948	4.919058050748895	3.9879863116733887	4.392961870484132	4.558444617162109	3.222803841736911	3.9204882619626775	2.8176785701549467	3.6262810169715993	3.4999520796089443	4.604279081826392	2.49717008540994	3.079504713573782
Naglyser(26:1/15:1)	0.03796	0.2257	1.5749	1.2078	0.8808	-0.1832	yes	down	777.628	6.3118	M+H	C46H84N2O7	49.7	0	4.4030000000000005	0.7013	4.999	0.8073	3.7652826758961035	4.112746433324304	3.887759360226642	4.3539540750631085	3.866920253823898	5.268850145280037	5.625329880429584	5.454857198923286	3.7427816879571374	3.965811884936824	4.329212833465534	3.8092806562470813	3.7535669411453054	5.521126284359113	4.254938229674811	5.286722353234199	5.424371178169551	5.631085166484097	3.9162896913713214	4.678323730094228	4.459145319124504	3.8151019956303216	5.156188917861635	5.278793242956874	5.435373429811387	3.653360013568812	5.786266495377017	3.7578726091471646	4.359728648945854	4.930327706276546	5.003994243367181
Asp Leu Glu	0.04672	0.2451	1.5746	1.0652	1.1248	0.1697	yes	up	376.172	3.3769	M+H	C15H25N3O8	81.8	0	4.4430000000000005	0.6311	3.95	0.6641	3.470222985984416	3.8411084412157743	3.9236344540025567	4.236916127337153	3.824553099320668	3.538525546183652	4.137213427502924	3.9068744314583568	4.663146720396645	5.256526866964854	5.054684737600108	5.12313668059889	3.873604267396172	3.7244382266634974	4.156837660384595	4.618167992466755	3.8388709437759636	4.945713776567109	4.923043731112137	5.650986009853066	4.369889957881559	5.175500139919362	4.286432527796056	3.511385149507332	3.9485526410912217	4.713224763632296	3.589987037782341	4.621314359205086	5.502275274840351	4.384445099870674	3.3489564038807518
2-Amino-4-Oxo-4-Alpha-Hydroxy-6-(Erythro-1',2',3'-Trihydroxypropyl)-5,6,7,8-Tetrahydroxypterin	0.03815	0.226	1.5738	1.2049	0.8745	-0.1934	yes	down	385.11	3.1202	M+ACN+Na	C9H15N5O8	0	52.1	4.001	0.6852	4.575	0.7632	4.4060444585479495	4.231258219497168	5.079936578267729	5.21088428987795	3.5096038141579906	6.1703420232757935	3.7387091253473432	5.1604025401116775	2.9749200920288152	4.434171337941409	4.090308709933296	3.7863232391750317	3.0563514301552845	4.028646489843696	4.1696654354543545	5.280153139486532	4.620819390225024	2.664303809792219	4.2957960020063775	4.1067211235991365	4.007581126359423	3.1806981598548947	4.509055141056878	5.0419737984441575	4.104866242304272	3.2396402439073886	6.255457865992786	4.415167376328975	3.665473970588909	4.783051743030374	4.099866368580416
Ser Glu Phe	0.009909999999999999	0.151	1.5714	1.1332	1.0967	0.1332	yes	up	382.161	3.9111	M+H	C17H23N3O7	57.9	0	4.956	0.3422	4.519	0.5434	4.614487935860915	5.025873081963903	4.663667301257784	4.021485598369028	5.300497698260521	5.04572141604534	5.275152462419415	3.822685687382056	5.078285998356444	5.110650961081887	5.287656807627396	4.829479872296548	5.051214598772249	5.105637479873081	4.778813302862416	4.523175716867601	5.013291530437494	5.189241525800472	5.272235299514348	5.100821593634006	4.852971392617787	4.972372282087076	4.927705976893323	3.7863481800662	4.97431181371635	4.127724447120803	4.436805165041209	3.9702025516790505	5.39091291320363	4.110116862263198	3.860987699249137
N-Phenylmaleimide	0.042289999999999994	0.2359	1.5711	1.1902	0.8797	-0.185	yes	down	218.046	2.2569	M+FA-H	C10H7NO2	0	51.9	3.86	0.7374	4.388	0.5539	3.618233490255612	5.231555968004439	3.325057388406102	5.3397071008811245	5.236950429926687	3.9859473535904617	3.6515897369542123	4.325902796312657	2.78927974577812	2.7452814707917583	3.7781598201852407	4.453739024528836	4.090619240559999	4.482634634560788	4.04403162451774	4.969915485171864	3.875743586801798	4.293085031556762	2.69486844821196	3.73964140265913	4.564827854029048	3.154781451115236	3.7313546975701235	4.784047525200509	4.145332290726069	4.512420163486802	4.732918772823168	4.747621685987737	2.8791619159284583	4.729962141537436	4.660164739371751
Inolin	0.033530000000000004	0.2161	1.571	1.3168	0.8547	-0.2265	yes	down	390.159	4.5677	M+FA-H	C19H23NO5	0	53.9	3.2119999999999997	0.7464	3.758	0.4966	3.0760706102018567	2.565019708051476	3.5880909134342964	3.639720241269916	2.746967095369305	5.141898122830915	3.6081804859822646	2.461673432366863	3.2553291447041706	2.5006406182766576	3.980575252932221	2.2786573941359083	2.3784268578083583	3.9525349937498313	2.4910918459476212	3.2075141558500464	3.1148633234067686	3.781896233348976	4.916356168829566	2.524988098870247	4.190130877480828	3.735216379386364	3.835426195446937	3.6303003980342736	3.0458586760178488	2.2649478073709437	4.020433442981656	3.9470085023871566	2.964222395937782	3.826248876085298	4.31974667583243
Elocalcitol	0.007292	0.1381	1.5672	1.1478	0.9174	-0.1244	yes	down	487.327	6.1702	M+FA-H	C29H43FO2	0	53	5.142	0.4601	5.605	0.3904	5.081511781987462	5.576336468085016	4.737365045705072	5.828961428322519	5.762713999085832	5.676011144345559	4.582524698515884	5.918291108159312	4.318648576648019	5.378118950313337	5.430946906297356	4.511097100953921	5.070197532381597	5.008385026113123	5.070036848237397	5.788256662995013	5.191888480561247	5.581906143894155	4.639509369748408	5.539740563303923	5.560009700337057	4.8486633270067685	4.897023439195416	5.764310061775348	5.297861793434696	5.189730761938004	6.332036274105947	5.712003807365145	5.335736468741831	6.01885069106102	5.698763403492117
Allithiamine	0.023969999999999998	0.1923	1.5664	1.1816	1.0927	0.128	yes	up	355.126	5.8753	M+H	C15H22N4O2S2	0	69	6.103	0.3748	5.585	0.828	6.264077955858692	5.5736745174198505	5.808476966293834	5.23465505929442	5.701612606986666	5.612923318336693	6.064099926835644	5.773708199319183	6.260645656221919	5.979783449273852	6.063075799613363	6.643380660686669	6.973880929469058	5.1203339269938875	6.4889588690205695	5.583751700874605	5.908635143732543	6.258095276339714	6.324217470909022	6.165418650754068	6.245565050666447	5.4060559286111936	6.047301811766883	5.570975137341112	5.330851529590512	6.205695507230471	3.88310230010844	6.0725703024131885	6.325178470802122	5.133038429895596	4.597477783895544
Asp Ile Asn	0.022969999999999997	0.1912	1.5661	1.0541	1.0967	0.1332	yes	up	361.171	2.0859	M+H	C14H24N4O7	42.6	0	5.034	0.4681	4.59	0.5532	3.9213257480311903	4.310988320236715	4.5081991564922985	2.9693630417871404	4.861638624493847	4.4263931088647945	4.851774008811382	5.597557843362384	5.019990027411514	5.3565150844591445	5.318029880420083	5.115655507638983	4.885965471573155	4.776985987204719	4.968907641995023	3.9680068086870217	5.350215760669576	5.525749212784247	5.1167704920226615	5.265200542322956	4.643361037270174	5.8954738422406425	5.1409427947035615	4.33273637524096	5.154930754943023	4.443684354366752	4.441020857059034	4.6248488622428825	5.650778571588675	4.260162409798626	4.1667663977725695
Cymorcin Monoglucoside	0.04808	0.2475	1.5651	1.2885	0.8487	-0.2366	yes	down	349.129	5.2204	M+Na-2H	C16H24O7	0	42.2	3.187	0.6438	3.755	0.8902	3.0769871615398365	3.697500002648049	4.014695047025287	3.217220712009069	4.540468702496557	3.0864846441663647	3.3350864165844283	3.4829101431516762	2.1830828087471983	3.6720131950751203	2.5856409353111767	3.36933956644796	3.0057613480479004	3.7362384550546803	2.429727726885736	3.578044734821791	3.1754794998500886	4.005361918100108	2.6210927867569107	3.449976076349786	2.442347005076134	2.3520923048874587	3.105399683850869	4.2699787366278485	3.3367182269378652	3.637719015231943	5.313954442064203	2.386327311554575	3.024612799321268	3.804681579633826	5.183997558335628
3-Carboxymedetomidine	0.006257	0.1328	1.5645	1.1022	0.9097	-0.1365	yes	down	229.098	4.5677	M-H	C13H14N2O2	59.4	0	4.312	0.3679	4.74	0.4319	4.353380494356634	4.824893918355354	4.504952418391022	4.664524689054767	3.9905636231107198	5.188100092950184	4.467415296107771	4.723057281340155	4.287252814501263	4.567188018170143	4.403875614757389	3.2446	4.63848962363795	4.224859963361888	3.9507667356434126	4.804597692717019	4.7339648244199966	4.138214839074411	4.196239653799655	4.318770103698921	4.294429149942408	3.9119877723472034	4.384690160140832	4.627003428738647	4.744815580470033	3.484074774888461	4.949057720614526	4.726032482112017	4.3653577581465175	5.171895640334238	4.728682318857773
1-Acetylpiperidine	0.003147	0.1105	1.564	1.2231	0.8996	-0.1527	yes	down	128.107	4.7995	M+H	C7H13NO	50.9	0	3.6010000000000004	0.2969	4.003	0.3968	3.5271367793734054	3.709942313308261	2.840073213547152	4.045892587135094	3.9582302821487034	4.358261155158997	3.4161625890380067	3.3587678135232286	3.5869111843736885	3.7055284321672888	3.7951162174662487	3.5771819450582054	3.7072039522046434	4.207210942391026	4.05460191675572	4.345331272661694	3.4991315934552114	4.130244699799877	3.749027635659063	3.3518213701334174	3.65071265593546	3.247326238246408	3.556964376730197	3.9265143094184136	4.377033027272513	3.7651768403242927	4.217721420359261	3.936836677740107	3.491719468655779	4.396103507136181	4.047697003749591
Gly Lys Asn	0.025480000000000003	0.1958	1.5636	1.0753	1.1112	0.1521	yes	up	318.181	4.8048	M+H	C12H23N5O5	53.8	0	4.876	0.3978	4.388	0.7586	4.451179212759285	4.4304016164576066	4.24937966974558	3.439974080777888	4.864353820453451	4.9683424150843845	4.9352725582669725	4.998733628736988	4.96615764230517	4.514510056949281	5.528434040784072	5.506085133786792	5.551923337651251	4.902620244344184	4.740483145727675	3.831237119806956	4.655217674955644	4.7884930888528325	4.619957431836808	5.505246829991648	4.560688003132416	4.933571408483777	4.848103278953458	4.897797622805423	5.0584708575950525	4.2554507474415555	2.733200551087996	3.948940196156383	5.008948828191606	4.005587187049258	3.3651553848633795
Val Glu Asn	0.008499	0.1454	1.5623	1.1623	1.088	0.1216	yes	up	361.171	1.8026	M+H	C14H24N4O7	39.8	0	5.257000000000001	0.3758	4.832	0.4574	4.76077315400258	4.873405699487897	4.245878108173613	3.54434806718292	5.3050021654709365	4.83884927167571	5.368982526560494	4.96652531237684	5.562570446157878	5.6449836818612775	5.6917916736925696	5.474870132798055	5.301662554681129	4.783418482401974	5.089383449156833	3.82144838132564	5.4352401230318295	5.629845993133249	5.526533409489106	5.536586208554896	4.838587947537506	5.397637740647956	5.232590943588117	4.644361048379493	5.357667064223907	5.054014534069601	4.173591739436295	4.746189214754399	5.631146831201653	4.348530154513061	4.620959779511021
H-D-Tyr-Val-Gly-Oh	0.01786	0.177	1.557	1.0975	0.8746	-0.1933	yes	down	372.13	3.1995	M+Cl	C16H23N3O5	0	68.2	3.411	0.5509	3.9	0.4871	3.8342842418359178	4.396108570874047	3.9971283256490713	3.7604850866615696	2.313328761632754	4.328062933068496	3.626887091313377	3.773075538318176	2.9314925184502005	3.3773369854335216	3.476247666226998	3.7317401566483266	3.603732397828748	3.8159761388886526	3.1160142946609337	4.163710559947471	4.2356198131827325	3.1705365870388107	2.6778898566233744	3.429325657577486	2.9389330759129977	2.631737431479627	3.5521952114052016	4.20596095664091	3.9605859358699504	2.036867266713108	4.5131556848042775	3.9706666697175685	3.8211429220016004	4.5273794195031085	3.5980400145563345
Coagulin R 3-Glucoside	0.04085	0.2324	1.557	1.2244	0.8846	-0.177	yes	down	633.325	5.8038	M+H	C34H48O11	0	65.2	4.529	0.7665	5.12	0.721	4.746093154805285	5.3052096593509335	4.822750512514248	6.020792431606862	4.821287250030919	5.439469953189808	4.786343172745268	4.809304995022889	2.6365717412018093	4.962358313401466	3.7361919906716783	4.1497300494842175	4.603662119645707	5.442838660992972	4.627678338964759	4.968234268855572	2.775469382647288	4.9359346057625615	4.2629426426937655	4.89885844345386	5.478216516415492	4.34017245372213	5.346885261470411	5.8328364460433475	4.894214072166691	4.358322491411853	5.805331196319427	5.348589023970954	4.009463231126016	5.837351808825266	4.233958692336403
Glu-Ser-Asn	0.005765	0.1306	1.5567	1.1808	0.912	-0.133	yes	down	349.139	4.5108	M+H	C12H20N4O8	84.2	0	4.4639999999999995	0.4059	4.895	0.3687	4.694812889690382	5.255768368138041	4.2060114969174665	4.9417874143773455	4.083333604346054	5.213147531053753	4.832484779932285	4.6541277245918815	4.066406929885805	4.8941889720180045	4.620863401725301	3.6875764824679744	4.647756641484884	4.724163075710015	4.573131979993272	5.051830358737122	4.743822518720799	4.425104623848831	4.62877207640211	4.442428267956503	4.086845986551448	3.677303417873924	4.59583557731102	4.7411342665183005	5.127525272182082	2.774939426404872	4.956086227973199	4.985944098551448	5.280248990157067	5.374690006321858	4.740923198144839
N-Acetyl-P-Benzoquinonimine	0.008615000000000001	0.1458	1.5556	1.0907	0.8958	-0.1587	yes	down	210.041	3.6174	M+FA-H	C8H7NO3	36.4	0	3.638	0.3859	4.061	0.4393	3.917291488455745	4.067471990840332	3.0412997313614105	4.255712499668281	3.735097344930451	4.8804489604658166	3.9756323581142055	3.943248045906623	2.9321124684331124	4.004152728546967	3.1199028425243887	3.297002583780829	3.7119305970087897	4.055772467737772	3.4884822401274307	4.197729719083993	4.306183626559865	3.249011941957242	3.6585490880504548	3.7002744399666887	3.944455355038953	3.322983268124496	3.714605478125396	3.920611154492817	3.611335668183176	3.236628470906393	4.693248257650389	3.904908249583897	3.3685112582484686	4.487661540334819	4.465418685031987
O-Propanoyl-D-Carnitine	0.01196	0.1579	1.5538	1.172	0.9177	-0.1239	yes	down	479.265	5.9736	2M+FA-H	C10H19NO4	0	48.7	5.487	0.3429	5.979	0.6796	5.549739517990769	5.543855343351495	5.189172569063034	6.257329845107268	5.615805305528884	6.143426999462204	5.1091456109529885	5.635614144039513	4.511865497369888	5.809647231057768	5.570684109710023	5.300458624253711	5.136197434130958	5.787528529408204	5.988566226733202	6.103019389653034	5.8411525500806505	5.795393889754688	5.383391324715404	5.794191087550201	5.656016643808107	5.378734180486928	5.4400061302211205	5.652326278518249	5.483678378318268	5.457112457817313	6.6312334361083405	5.859081185606657	5.6739180046614495	6.425302527668582	5.739017220848262
Val Val	0.008908	0.1467	1.5536	1.0521	1.0659	0.092	yes	up	217.154	2.0165	M+H	C10H20N2O3	76	0	6.473	0.3187	6.0729999999999995	0.4784	6.508501209833827	5.840218160124032	6.113088420021992	5.301286665588844	5.9332235479052615	6.451038215363747	6.61074142899276	6.6435757972652985	6.551633040037976	6.861803137339709	6.688440960053562	6.715082944766568	6.580463575215679	6.6112997623553715	6.141935259255537	5.437220681106757	6.613178628314032	6.359915502060588	6.063153389573247	7.0354336861805695	6.509036806639588	6.516916072297739	6.705441528588616	5.826489246320256	6.7411916836707775	5.7482771728709015	5.696620312832831	5.449805944994538	6.406841075296992	5.8047014224354845	5.74344112151584
Ile Gly	0.006229	0.1328	1.5535	1.051	1.078	0.1083	yes	up	189.123	1.7973	M+H	C8H16N2O3	59.3	0	5.296	0.3304	4.913	0.3845	5.150408987003769	4.666765464189521	4.790399585634077	4.358082326202699	4.910424850508728	5.428707342025484	5.612482362138766	5.259416293990877	5.3520861483318845	5.669959142656622	5.547114229775262	5.651777508279816	5.4621490293011465	5.0982263004526365	4.803533318351947	4.613753380042713	5.2940520424927735	5.413586222429434	5.091012131942987	5.769806821192288	5.097981392546844	5.539612369247973	5.5423756751484925	4.640171710531794	5.0136930927213585	4.566054511007438	4.670404170699245	4.717670452231761	5.351784717652624	4.553588815878181	4.679109812071985
Galactonic Acid	0.005814	0.1306	1.5517	1.5587	1.0726	0.1012	yes	up	195.051	0.5845	M-H	C6H12O7	78.8	0	6.29	0.4562	5.864	0.2361	6.390551449043548	7.643012831574074	5.75998844280175	5.705256187489362	6.316770907780766	6.213353109058208	5.899057647586262	6.071731750770644	6.559840825967518	6.248724545755618	6.4291430136510765	7.162082654057027	6.1956060966255535	5.908611147127224	6.121069346937157	5.937261087924298	5.866969128312224	6.00688434197015	6.429262191952442	6.050817566120603	6.384354109718852	6.000587974357753	5.968038524095267	5.9066519915212226	5.580129998016255	5.754546253084576	6.0130940563035296	5.695571394373517	6.0151153793905365	5.647815766060425	6.269115077214434
2-(3,5-Dimethylpyrazol-1-Yl)Butanedioic Acid	0.0008767000000000001	0.06295	1.5506	1.0946	0.9321	-0.1015	yes	down	213.087	1.8026	M+H	C9H12N2O4	40.5	0	4.6530000000000005	0.2157	4.992	0.2928	4.626895656947768	4.65389130665499	4.576539323584102	4.960919354492227	4.979594704879887	4.844884592278233	4.980817745082555	4.5948459682763945	4.412251124995948	4.820215881566231	4.5772319285389855	4.533869077599839	4.3915950062604425	4.419021689901318	4.724962670661236	4.986648954530831	5.212638576390956	4.662665346067757	4.522246061180881	4.603338285840419	4.5754848949618685	4.608707825820514	4.348002438546992	4.986868965133351	4.975362543609378	4.4127421273831136	5.042961876686082	4.829634175205172	4.700368834327241	5.399297110454143	5.026139116933921
Glutaminylaspartic Acid	0.03209	0.2124	1.5502	1.1471	1.151	0.2029	yes	up	296.063	5.6957	M+Cl	C9H15N3O6	0	44.4	3.7880000000000003	0.5318	3.2910000000000004	0.6942	4.387818468496711	4.305972465491094	3.1392018702778968	2.509915192765753	2.5836974370415877	2.906541007793936	3.768049956807226	4.047480720833482	3.744668730689257	4.145218437145738	3.926549686059458	3.308087483129484	3.042077391736219	4.047837994733918	4.021866627795629	2.4987282825246218	3.7992055806673344	4.546304365179716	4.366274975194767	4.315882686975556	3.2648741561770693	3.7303295160884815	3.5263736437363984	2.6342899655751983	4.169627160161122	4.004026951243684	2.5288592772769616	2.489155477246661	3.865371838883677	3.9873215939460485	3.5867392828834617
Tyr Lys	0.022119999999999997	0.1891	1.5485	1.1606	1.0992	0.1365	yes	up	310.175	4.0504	M+H	C15H23N3O4	49.8	0	5.008	0.4859	4.556	0.5384	5.018629435620705	4.270419500687463	4.943641818283452	3.7766997938326976	4.1797013933262965	4.490155826588617	5.107927191527486	5.583162470300572	4.4858358332809	5.190809626020228	4.863930033572903	4.519006282650164	4.638098766011848	4.570609666011467	4.652584999317091	3.822862087152136	5.580987901717397	5.040209421516179	5.131121774744369	4.823416137338067	5.697868342665839	5.71016278611499	5.713171413480004	3.999323701221005	4.393502134448089	4.144603045443887	4.358148603331541	5.373681527290975	4.5429554021142025	3.7791508617567233	4.495926468909006
Tropolone	0.04384	0.2387	1.5478	1.4298	0.872	-0.1975	yes	down	164.07	5.8593	M+ACN+H	C7H6O2	0	67.7	3.7889999999999997	0.6095	4.345	0.8623	4.048827702947367	4.201776741635602	4.514349441961914	5.214318707365538	4.300285433881179	5.166455831091677	4.052276311638455	4.264341408829161	2.6137730833555732	3.622010347446648	3.254939914437913	3.2762882541278064	4.0100778467035685	4.852444609546189	3.988605353789203	4.993849872627903	3.6000445934856544	3.809141155249368	3.1439795830318715	3.510989753305366	4.995005547975215	2.675497077611824	4.09943485913236	5.208823453718984	3.6889091569686014	3.6006258193320706	5.363024758933797	5.0708191312964095	3.080054255229576	5.066775417748401	3.7007394939310574
7A,12A-Dihydroxy-Cholestene-3-One	0.006028	0.1306	1.5469	1.1212	0.9322	-0.1013	yes	down	461.327	6.4315	M+FA-H	C27H44O3	0	73.3	6.06	0.4434	6.501	0.3273	6.293647815887129	6.0404179172616415	5.747087534688679	6.649591300764551	6.425063274038871	6.786125098071069	6.2183750326243885	6.38713576379121	5.225524807631071	5.963834753123595	5.816099202593563	5.595312594611335	5.804539691330718	6.491328572540202	6.686867677482862	6.99130952461574	6.345248885171016	6.487539843627095	5.9503435040937624	6.076578246114414	6.330230686620138	5.079898759667022	6.669418622472843	6.517940654081054	6.288691117650273	6.07392253145669	6.909617703522308	6.833913051253775	6.1713572824651415	6.800179666201173	6.5470848161086455
N-Lactoyl-Tryptophan	0.00775	0.1418	1.5464	1.0789	0.9057	-0.143	yes	down	297.086	4.5731	M+Na-2H	C14H16N2O4	0	45.3	4.08	0.3485	4.505	0.4783	4.0772273192515405	4.380059503803469	4.2844353419015935	4.452540667315591	3.835480148831805	5.043102691394125	4.289519808792413	4.4323173284042285	4.1115702068562205	4.327014519170488	4.225848755890345	3.1792671602594926	4.515153129316731	3.986658553889369	3.7084318768661295	4.653811851768955	4.551507983790658	3.917423891986632	3.888211025273917	3.9668596141402883	4.113867386478774	3.53746285003263	4.180903434791838	4.458222599163447	4.313050260205366	3.124401073906037	4.722278055245707	4.556500930791115	3.9411409110796862	4.976495802068703	4.490278287391397
Leu Glu Val	0.012159999999999999	0.1585	1.5455	1.1324	1.084	0.1164	yes	up	360.212	4.5589	M+H	C16H29N3O6	42.8	0	5.135	0.3253	4.737	0.507	4.580770405930696	5.266541482111873	5.179921722326188	3.9790196882030098	5.409195012019322	5.31273546736394	5.831240751872784	5.1264018469406745	4.876456070022677	4.825718684478626	5.453238843104588	4.7646161788482715	5.240536423693638	5.460148512385398	4.7332217532935985	4.452319267626024	5.0061813032313065	5.0631642745393135	5.275873738057572	5.700806516511296	4.907196076663517	5.042410858863521	5.2851133760260725	4.6809979508021256	4.811179007167539	4.402888339310957	5.1094147090110456	4.348855586336808	5.398826365325023	4.623205355667039	3.6756938586654133
3-Des(Dimethylaminoethyl)-3-Acetic Acid Zolmitriptan	0.0056700000000000006	0.1306	1.5429	1.1812	0.9064	-0.1418	yes	down	275.102	4.7139	M+H	C14H14N2O4	0	55.5	4.1339999999999995	0.3358	4.561	0.4607	4.499324229595376	4.560192059347417	4.041242008144598	4.548275564120185	3.85199694980004	4.928418733915228	4.12332086502571	4.342378938467975	3.962083031492588	4.598260882311718	4.406887158577468	3.71879769863449	4.248028363103212	4.410686683337462	3.5695986954735046	4.8795381397681465	4.661338424558362	4.144282169147198	3.987436854294197	4.399861907996996	3.6770607013712966	3.7232733747929054	4.024303472480713	3.988079215485132	4.37159827048652	2.6109110978958543	5.094078376500526	4.2282260481523375	4.5921621695901695	4.8894173484716275	4.452412598086237
3-Hydroxyoctanoic Acid	0.031639999999999995	0.2114	1.5422	1.3286	0.835	-0.2602	yes	down	219.124	3.5531	M+Hac-H	C8H16O3	41.1	0	2.616	0.509	3.133	0.7683	2.7931751701290937	3.154771441602373	2.511867004974236	3.0876641708692234	3.0476455436233096	3.680957986317796	1.99849154828926	3.138152504143389	1.7382343052222151	2.6792170222188965	1.9234063856982664	1.814771795633565	2.9707297325846933	3.2183132393740537	2.7382636621783485	3.535440689455532	2.537695724385028	2.3684607186318787	2.0565503874974227	3.183718638676095	3.376696248747783	2.6467907742356327	3.0307659868480687	3.2582792068028654	2.0090644799993367	1.8012029703492658	3.768458977338879	3.381584147940228	1.889067096969892	4.183113751114774	3.5212120853398976
Glu-Ala-Thr	0.0047409999999999996	0.1263	1.5413	1.0983	0.9287	-0.1067	yes	down	318.13	0.6111	M-H	C12H21N3O7	48.3	0	5.187	0.3233	5.585	0.397	5.299332204158127	5.614310512559558	4.547952846986272	5.246760500063194	5.460765204440613	5.7006342734241775	5.038403978160208	5.5997823917795175	4.943925727026199	5.713560261280315	5.257266465883096	4.80451324207237	5.2838207711413565	5.2754051226686585	4.850741858623085	6.025135811186742	5.324286253208625	5.129303817768342	5.289200935684481	5.513117431944481	4.726286491891946	4.964097389230113	5.1922100596508045	5.582263482964766	5.55588165209292	4.946071587172451	5.686615317766722	5.563011740980123	5.3982535352716505	6.081577653821702	5.690933609572159
Seryltryptophan	0.0206	0.1849	1.537	1.1513	1.1085	0.1487	yes	up	292.129	3.9487	M+H	C14H17N3O4	0	56	4.565	0.4485	4.118	0.5634	3.683593061335902	3.7431590079529538	4.043080629273762	3.140274349275506	4.570374428659679	4.60152105687536	5.2434916358281365	4.3914812703552135	4.941362627266567	4.989813700586477	4.767752052287823	4.913324132800238	4.160278820808446	4.619773427686126	4.098514325681015	3.4689614417064867	4.9431872305797775	4.662449250830655	4.418437743870365	4.699448181163159	4.513274130377104	5.009889863682201	4.948948868039254	3.904190267394232	4.5794025013584045	4.431063314102594	3.3899700499181384	3.8625909775639187	5.192277211188507	3.2728717886355723	3.888256023009345
N-Succinyl-L,L-2,6-Diaminopimelate	0.03444	0.2182	1.5348	1.42	1.1404	0.1895	yes	up	329.074	4.2054	M+K	C11H18N2O7	0	44.8	4.062	0.6152	3.562	0.6036	4.759138808838466	3.620646414770221	4.697784299789396	2.82726760191872	2.9174149686577104	4.541300710224832	3.904041342052471	4.3560254576519295	2.7934306694470314	5.03948645280864	4.38507283515471	2.9301119729777247	4.2963396106149325	2.9201726706332662	4.436396975953066	2.9576340384644086	4.025314755463311	4.140922090672708	4.188172522374293	3.95138533652142	4.235012611292483	4.3588894720870615	4.147007116158739	2.913141233656582	3.8059875515598036	2.704150812495413	2.980944295102637	3.56805802870157	2.9966826255061036	2.9506616834181005	4.734819832914021
5-Hydroxyconiferyl Alcohol	0.01077	0.1529	1.5330000000000001	1.1246	0.8869	-0.1731	yes	down	238.107	4.1948	M+ACN+H	C10H12O4	0	40.1	3.404	0.431	3.838	0.4343	3.412211989737011	3.787204032696221	3.1565723399723806	4.029785678116987	3.57357512469588	4.295220006401071	3.1899653261050585	3.9974958550728736	2.807991773851786	3.13716247294677	3.637077225314588	2.874405927224333	3.5970705299992445	4.1850340963258565	4.1256294393534985	4.070947718671024	3.086951784782688	4.317178522401174	2.981302993798685	3.2726075592992534	3.1919340566299232	3.5559718943508547	2.967734534812265	3.7538427802162624	4.492563971596038	2.826369124216164	3.801675160843199	3.5456161623293507	3.0112523553095265	4.305573702820183	3.5684734866223486
Cer(20:0_2O/16:2_(2Oh))	0.03044	0.2081	1.5317	1.1118	0.9147	-0.1286	yes	down	624.521	6.8747	M+Cl, M+FA-H	C36H69NO4	48.5	0	5.096	0.5321	5.571000000000001	0.6172	4.398933603635308	5.7918844574417445	5.508950814792256	4.902807730209871	5.9027260808357775	5.9460227302037865	5.601565629002608	5.419343632947052	4.7066571905590235	4.254885946351753	5.219636355637978	5.381077410349565	4.277203776866453	6.017730530119063	4.481582434474609	6.020421895979003	4.962674519051347	5.450270007861583	5.4047441692832825	5.2520839350000434	5.512669482022648	4.4162439978306125	4.88958866298925	5.4958564422331335	5.483676995053258	5.775693514278991	6.527209956421665	4.6347591649806335	4.7402990750012055	5.8950608758543845	5.806679669833188
4-(3,4-Dimethoxyphenyl)-1-(3,5-Dimethylphenyl)Piperidine-2,6-Dione	0.01488	0.1673	1.5316	1.1006	0.9163	-0.1261	yes	down	354.171	5.0506	M+H	C21H23NO4	73	0	5.067	0.5379999999999999	5.53	0.3825	5.302484418243205	4.768652590015369	5.741616906750509	5.6048118335700465	5.782948857336709	6.326597516298218	5.3346838395174165	5.551316976532169	4.378513596982769	5.036203784627788	4.317160870752962	4.7887245569800605	4.314933180863454	5.9286675834402685	4.993109567564417	5.087045121347382	5.5451214586921775	5.586227355206142	5.145698109976847	4.267608804412851	5.846600028874429	4.471481030439323	5.091330323737986	5.595139298408365	4.744538446526657	4.090053068493168	5.364829140400376	5.616624967110795	5.5027267346708335	6.217292595516122	5.726732363553665
L-Arginine, L-Asparaginylglycyl-	0.04798	0.2472	1.5315	1.0971	0.8591	-0.2191	yes	down	326.159	5.0118	M-H2O-H	C12H23N7O5	0	40.4	3.219	0.6804	3.747	0.7132	3.760746190203424	3.4986670617529936	3.242370016366203	4.536221802475309	3.804514146822632	4.582713343431844	3.09879541180522	2.839797641961608	3.260855735286019	3.613830015097826	4.0815959092768646	2.2978935105617984	1.8524772451718303	3.91141324745624	4.254051747541689	4.7201508940012245	2.7436587441481946	4.1542884791625285	3.7316600386805763	3.1619570304167306	2.9743985262856545	2.3938808962476745	2.4040934715250453	3.7737737321603326	4.5271092006805	3.126122313783964	4.162763967411848	4.012617328622178	2.9938122739829995	4.26395464627974	4.5870893010228135
5-Hydroxyvalproic Acid	0.04217	0.2356	1.5251	1.2483	0.8411	-0.2496	yes	down	219.124	4.0654	M+Hac-H	C8H16O3	0	41.3	3.1239999999999997	0.8129	3.714	0.645	3.975879047843754	3.277804923610766	3.742761157730574	3.8239169036874388	4.0642109807040585	4.383790991611848	2.465847340026228	3.4307559570371406	1.8767559672090304	2.1746077941762643	2.0626936044999566	2.852756459868393	3.021828457988269	4.589090122837048	4.079570712587286	4.140453476401142	2.1493172931387	3.3719321251937036	2.6772694118401934	3.8673097302626163	4.2900224731297465	2.087723932670157	3.881399368928225	4.078035190095259	2.3232166714936566	1.97919511980048	4.300562491353845	4.250884292272192	3.634726298773323	3.914357589312934	3.3524420461162485
3-[3-(1,3-Dimethylpyrazol-4-Yl)-1,2,4-Triazol-1-Yl]-5-Methyl-1,2-Oxazole	0.029480000000000003	0.2059	1.5249	1.0345	1.1091	0.1494	yes	up	262.139	1.0505	M+NH4	C11H12N6O	39.3	0	4.545	0.4622	4.098	0.6229	4.365412035803151	4.12639420171835	4.332028560417002	3.6822747648216234	4.766586823202792	4.192117262690078	5.104862148154496	4.713828508755464	4.552433434023583	4.648063431983038	4.634639342601087	3.497480685173695	4.6251092937949645	4.428984040301421	3.4937898488299446	3.413040306991628	4.741707866361999	5.404242989250548	4.555787440040549	4.932972174380018	4.4774353116466985	4.710504375815706	4.66657312479608	3.3685139115697416	4.258240066010426	3.1593102291218615	4.214517570619058	3.464296862665453	4.721333290281624	4.691954858964594	3.6231708641281033
Norepinephrine Sulfate	0.01703	0.174	1.5243	1.0976	1.0942	0.1299	yes	up	248.023	1.0606	M-H	C8H11NO6S	0	40.1	5.122000000000001	0.5064	4.681	0.4101	5.304901887030695	4.541485302221723	4.405755792591582	5.686773679527365	4.023164426054597	4.165104078232588	5.163235376124471	5.386434569204449	4.953042200715159	6.045964336347983	5.380056990756377	4.673258170560682	4.948888801268245	3.7819595852704393	5.529829472494036	4.342079306206757	5.914440038585446	4.932884237243888	5.090127436048696	4.923950292802487	5.103782029486365	5.742776485197786	5.251664849088785	4.941909494035449	4.537536381303428	4.835593355443872	4.4420277927567735	4.474314939629567	5.3679376585231235	4.901896673052777	4.062567419726803
Benzaldehyde Glyceryl Acetal	0.019459999999999998	0.1823	1.5241	1.4811	1.1356	0.1835	yes	up	225.077	4.9423	M+FA-H	C10H12O3	0	46.1	4.003	0.5686	3.525	0.4441	3.734061319834016	3.789485558519085	3.6432259050420783	3.4749595688111	3.3533994672417404	3.5007837779279765	4.526891461954486	3.540435026668364	2.8367627508231767	3.648700848735482	3.9803299070829294	4.019253887862666	4.230724572866343	3.175402358633172	4.323412936108201	2.900319905581137	4.843378163071965	4.6207225521286786	4.9396620145133205	3.541548891925125	4.428877412203981	3.4579058715152104	4.606235117036469	3.6883699226701454	3.0212033748125724	4.270562546840418	3.2554053774009817	2.982246210559455	3.505644184420364	3.9877491319856166	3.5516660942006983
Lpe(O-18:2)	0.01406	0.1648	1.5225	1.3926	0.9254	-0.1118	yes	down	462.299	6.5807	M-H	C23H46NO6P	62.6	0	5.721	0.4753	6.182	0.483	6.091968385218617	5.949156281698762	5.409692757587418	6.8723241756582185	6.537485287526184	6.510964321177613	6.562885756861446	6.29175232994394	4.6470279927786065	5.342093651210797	5.294150841044089	5.498900262211131	5.379474872252041	6.11093481332292	5.656996056677188	6.6800830866291925	5.943466248725934	5.43077624246617	5.951107150906832	5.95545623319629	5.746993495523398	5.287589789460442	5.729064779078891	6.015510544885813	6.379205975848395	5.933588346493055	5.827734959287128	6.1193780363998735	6.3409957490867885	6.502570056948912	6.47565398854354
Senkyunolide G	0.03926	0.2285	1.5219999999999998	1.1899	0.8637	-0.2114	yes	down	209.117	5.0506	M+H	C12H16O3	66.3	0	3.282	0.5215	3.8	0.8187	3.3987755802720265	4.2958180826828345	3.725784806246112	2.3332672229356395	3.6826700523092497	4.084326554982463	3.4290957519142373	2.479107627345098	2.7594638409481203	3.5871933293493785	3.5032380666199314	2.9478473688003097	3.4319723392342762	3.5582778565186604	3.894786503975826	3.8144816502707006	2.488960624415371	2.4917481336032665	3.589827721143977	2.5763304965928704	3.521557410220161	3.25480777993464	3.308309385973766	3.695453675946775	2.459275395106558	2.520729532531617	5.227246073876588	4.4872890331001605	2.6100844583429152	4.512050488409722	3.894757025488402
N-Eicosapentaenoyl Lysine	0.0006533	0.05525	1.5217	1.1499	0.9493	-0.0751	yes	down	465.286	6.0958	M+Cl	C26H42N2O3	0	45.6	6.287000000000001	0.2393	6.622999999999999	0.239	6.263553535705428	6.351950891997568	5.864296372285095	6.9028872683758165	6.391807627921684	6.701848426793443	6.3183869275680085	6.3829466988388575	5.946031170974318	6.551490323115121	6.252689113511746	6.021475700486389	5.985125284271202	6.390706689115138	6.7238637763568745	6.7149069409851965	6.606742731246384	6.510217925164957	6.313617694681307	6.413743082883426	6.409329215803957	6.008555592066966	6.127762739174888	6.365892168988447	6.342846367705394	6.507370455197729	6.915773931845074	6.675063687826648	6.615336997127876	6.899479976307014	6.477104716407608
6-Fluoromevalonate	0.00015930000000000002	0.02624	1.5193	1.3107	1.0728	0.1014	yes	up	207.066	5.9895	M+Hac-H	C6H9FO3	0	48.8	4.9510000000000005	0.1711	4.615	0.2617	5.0583380256240025	5.196742446404113	4.740565181679694	4.860387216574713	5.091568223420413	4.727621873522934	5.045609181239664	4.911864539367612	4.994021426115699	4.955702956779281	4.647968464055683	4.804244800138935	5.05740654673747	4.498921716372653	4.978293278879884	4.857318606009971	4.899437208628173	4.601551085167565	4.8354750066656464	4.9068378964130845	5.090219407169537	5.252842327297358	5.0019320417313535	4.871722081761828	4.76514185013278	4.806328844066591	4.210960008606026	4.90315770377712	4.5175060050516525	4.218558021396763	4.731796860232683
Val Glu Thr	0.01037	0.1512	1.5165	1.1338	1.0853	0.11800000000000001	yes	up	348.176	1.7599	M+H	C14H25N3O7	61	0	5.397	0.2721	4.973	0.586	4.985653601794333	4.965640313408059	5.065699004005023	4.261681150450129	5.478251867424303	5.091933075927483	5.6345705845070055	5.10473875728192	5.654023706669299	5.69427557539992	5.771495790992391	5.537075796494398	5.3836254152514895	5.050590694747652	5.228957902877363	4.3707612871088575	5.620904020301516	5.758816988722107	5.5930467512266135	5.308573196869805	5.040454243972388	5.461628293609097	5.2648247190080015	4.9128466583369494	5.5944439383685385	4.909264019016279	3.745052835209578	4.961616681529205	5.639850106824879	4.433348382094552	4.970119919775262
Val Leu Val	0.016380000000000002	0.172	1.5162	1.0174	1.0836	0.1158	yes	up	330.238	4.5535	M+H	C16H31N3O4	71.4	0	5.291	0.3597	4.883	0.5342	4.781523057652176	4.931592858738943	4.986438979558288	5.641898417731037	5.220320767609502	5.107385055463609	6.004275159564923	5.2652858485897145	5.219204088273822	5.474222851718211	5.421283357477144	4.8193904189315	5.43895078557817	5.29469836466626	4.696745768870692	4.145659502002185	5.3853177619264505	5.055383159784241	5.727449067343332	5.764311693619405	5.1597134812828935	5.5276373258984615	5.649153463904887	4.858568944866321	5.0113242222323375	4.681144857558885	4.824095166587557	4.5053876610870365	5.525144365370358	4.484756307595019	4.251224929834379
1-[5-(Trifluoromethyl)-2-Pyridyl]Piperidine-4-Carboxylic Acid	0.004257	0.1212	1.5161	1.0998	0.9146	-0.1289	yes	down	273.088	4.7227	M-H	C12H13F3N2O2	70.2	0	4.228	0.2906	4.623	0.4196	4.510052998079418	4.740553119656028	4.03349265661613	4.688878037412657	4.054051040773403	4.964304855122032	4.234977611144004	4.418074693276616	4.085333728367249	4.593081672542008	4.363432377501193	3.818785876272223	4.37000785896125	4.3813535465306535	3.792081806284165	4.942002105818804	4.686364605366134	4.103127954350699	4.001939531556807	4.491942402582672	3.9780783330780167	3.896656842590093	4.156412831652307	4.213472909572034	4.326583545811792	3.2242393063439176	5.177551871838063	4.418029927220863	4.522014440832958	4.861156926145183	4.737637781685148
Galactosylhydroxylysine	0.04687	0.2454	1.5132	1.3433	0.8556	-0.2251	yes	down	649.319	4.3449	2M+H	C12H24N2O8	0	65	3.53	0.4771	4.126	1.107	2.9242937680696284	4.163845866417135	3.0466616964500584	3.956465590570247	3.8550289848342	3.6622627530246366	3.3120160603809663	4.5038105747828405	3.97413803805485	3.100813542803944	3.444329013433252	3.238222384843441	3.8434917283153376	5.3148168638106315	3.7596491914707295	4.932950440230818	3.521956607166087	4.298619627395067	3.2188718867835218	3.606174924648239	2.8923606865209512	3.3080864171934445	3.0615995408658083	4.956386942187933	3.665247219728911	4.593728309003349	6.070456925131308	2.979873443109873	4.320681076627652	5.157304543141043	4.2751294749281605
Val Asp Ala	0.001936	0.09419	1.5131	1.0378	1.0646	0.0903	yes	up	304.15	1.7599	M+H	C12H21N3O6	50.3	0	5.587999999999999	0.1588	5.249	0.3886	5.336383150359795	5.5440189193854295	5.352876381604626	5.441435306199039	5.716024506390222	5.333958475244937	5.742120807071668	5.501561510501093	5.503634771145396	5.648119881402918	5.806756331802298	5.548160852614283	5.6171240074505695	5.472422271088668	5.3714855205264005	5.246106129223969	5.636570380834643	5.835066129028663	5.542465560587711	5.895440197232157	5.490832602537608	5.596641012040963	5.495459905560712	4.715708566660989	5.5881043745399275	4.645663528197242	5.205421819673865	5.08973146814601	5.675296384073559	4.949480114214934	4.691209026840038
Ser-Leu-Pro	0.018609999999999998	0.18	1.5127	1.0242	1.0895	0.1237	yes	up	316.186	3.163	M+H	C14H25N3O5	60.8	0	5.003	0.319	4.592	0.6008	4.98119499502861	4.685742207563384	4.816822653418278	4.244165109922308	4.641092543087145	5.36931959703246	5.429159528771247	5.052907341122643	4.804329451023446	4.955675527695781	5.015261292599994	4.592191829305847	5.3989081362961135	5.295584339795968	4.420487534178693	4.8956818332686565	5.128375929710738	5.033440344728091	5.072366649728504	5.528461533641084	5.398083456273892	4.722575571094282	5.380326052485019	4.38106321443947	4.668433521794993	4.237493828614005	5.046432758755925	4.307096711570391	4.883068397097474	3.5725008416428063	3.9561007335061187
Norbenzoylecgonine	0.006666	0.1354	1.5117	1.1635	0.9102	-0.1358	yes	down	334.13	3.4249	M+Hac-H	C15H17NO4	54.4	0	4.032	0.3702	4.43	0.3687	3.74909552175532	4.342723648312192	3.5847687535885466	4.568504592139451	3.6342339792818654	4.818429027506281	4.548051190192897	4.3110660909768255	4.0996451661328415	4.596195171087587	4.051785556434565	3.670568519603281	4.187068670357967	4.072431615114117	3.399214149494873	4.934906164980584	4.706133464974836	4.041612889227431	4.040272552280792	4.1038079597443815	3.9530037614303217	3.5392959278147686	4.048109101672263	4.243521061762617	4.119497392600844	2.272796692552728	4.545757680227863	4.483358382891057	4.354981115538754	4.774571181721453	4.624544331114906
Gly-Val-Ala	0.007359999999999999	0.1387	1.5115	1.0656	1.095	0.131	yes	up	244.13	1.783	M-H	C10H19N3O4	42.9	0	4.505	0.1504	4.114	0.5648	4.137541456093672	4.411428840589714	4.428789852400189	3.844045911784837	4.694678319887914	4.183423544788391	4.5580320769009255	4.424680148049962	4.496740825259419	4.698673372209623	4.3994664808849056	4.431791402054984	4.638507889924997	4.279969001640104	4.386185240777111	3.08897777841353	4.581578749478567	4.528394001763212	4.356491885256193	4.7902155511241205	4.631113292364349	4.485852081976439	4.506720662190109	3.9757542304071367	4.624269096121675	3.561539199913012	4.246697352620723	4.17105059264572	4.253476901135483	3.2225675429954075	4.014771314307688
Pentostatin	0.025660000000000002	0.1965	1.5097	1.0732	0.8938	-0.162	yes	down	289.093	1.783	M+Na-2H	C11H16N4O4	0	46.9	3.9130000000000003	0.5232	4.378	0.5564	4.132092012971862	4.526588571296261	4.076253238172863	4.638086153511426	3.3494875402778934	4.8249109645122665	4.528991543861566	4.2927260702515815	3.7374500792677567	3.9521173856328766	3.8677592452010208	4.667601733413798	3.8689474481736457	4.122638497567623	3.6698794275028255	5.5682267050555865	4.6628182362754345	3.1166255301585846	3.2552792387296616	3.2484114414317187	3.926849158865525	3.0910218068549598	4.385025131102871	4.595769748123994	4.140382759420087	3.5435183019767034	4.9224557304863295	5.583101049418676	3.9685448863449233	4.575021842148935	4.370111324497975
2-N-Propyl-4-Oxopentanoic Acid	0.019430000000000003	0.1823	1.5092	1.1257	0.8835	-0.1787	yes	down	217.108	4.5891	M+Hac-H	C8H14O3	0	40.6	3.503	0.5232	3.965	0.4772	3.661745140312864	4.014562687751433	3.786190556798405	4.070786986553234	3.8337460264964935	4.32164755341173	3.3556496488545187	3.451508705970077	2.0915974771090364	3.730386161368069	3.4048366634846365	2.1688614880449943	3.507969824345415	3.8570152530004815	3.8313359326877685	4.242374428246138	3.4987910364442034	3.4627646222968465	3.4496840963870183	3.718834290375633	3.711151017175258	3.9980832732809084	3.883757179429428	4.036528196418775	3.4000251624512474	2.161561381239645	4.560175927922558	3.913131093333536	3.2141317597084376	4.379449215394356	4.192680721973366
Asp-Gln-Asn	0.0444	0.2402	1.5087	1.2257	0.8558	-0.2247	yes	down	356.125	4.7386	M-H2O-H	C13H21N5O8	51.3	0	3.1630000000000003	0.773	3.696	0.5205	3.3302948414241134	3.3679727564905173	2.8733258944960802	3.6698328562895854	2.453537609290533	4.00993855939036	2.065762719241488	3.673508608521797	2.8417065606596075	4.028037780562622	3.7353791420881532	4.630035046685128	1.9807741686224047	3.592645347894311	2.09281399499123	3.926365713688487	4.2464711930033525	3.106119707294934	2.9847485024162266	3.6532067065873313	2.105378862429939	3.5351360022941853	3.395109556651238	3.499588646449844	3.655147616621336	1.8681107391380605	4.0313736581909705	3.9135140031852518	3.4549864816215337	3.8883774568889744	3.9736839024839563
Histidinal	0.008870999999999999	0.1467	1.5077	1.1069	0.9129	-0.1315	yes	down	184.073	0.7022	M+FA-H	C6H9N3O	0	60	4.295	0.3818	4.705	0.4178	3.906005007796936	4.684736978448255	4.658621662810198	4.528291939554794	5.012788240518048	4.665943910453033	4.192127601956654	4.5876045595270725	3.41045407427762	4.341491756098937	3.9085805175341646	4.241564337289389	4.236925470159107	4.2987762642401925	4.287050787220174	4.85135318953747	4.752351697169564	4.137089616638141	3.954059765400464	4.677933339034456	4.446047325268012	3.9639845604661694	4.205276929861715	5.137875987961938	4.608198478468161	4.019096157435102	5.081875849055889	4.777306995049832	4.434596898949686	5.0594884768069495	4.8832529782610825
Dihydrodaidzin	0.03792	0.2257	1.5071	1.0205	1.1389	0.1876	yes	up	463.124	3.5852	M+FA-H	C21H22O9	0	60	3.846	0.5608	3.377	0.6213	3.6313994903957982	3.6747542548500602	2.4320323891814057	4.3762898389927365	4.376040317666367	3.161762340764209	3.724946488068447	3.609183292146109	3.7622587037210287	4.860896177597528	4.5695886453298185	4.253085514555785	3.8612829711921774	3.5273996206206784	4.361445169299143	2.5794653856708787	3.55404719939644	4.245504736227438	3.786795921859895	3.7399393474270015	2.8939506517828453	4.065945414409414	3.675927881536504	3.493955208679628	3.7436311413626258	2.9574286861285874	2.6096120921536383	2.8588516066093645	4.198596082373326	4.0450008669059345	2.7867669073859243
Glycerol Lactate Pyruvate	0.03955	0.2292	1.5027	2.0303	0.8871	-0.1729	yes	down	467.139	1.0553	2M-H	C9H14O7	0	46.9	3.951	0.6737	4.454	0.5597	3.8295285604555502	5.112476303959214	3.7600397257939626	3.66014706888376	3.0242935969018165	4.947975487936129	3.5240684635863198	4.634792476352947	3.633526428976945	4.597856806518888	4.364553376747797	4.439266010720906	2.860153250442941	3.7781999784619416	2.9730975708031395	4.468274469195884	4.55979290855401	3.7938168833611474	4.567041067946184	3.750857749008053	2.985749977801485	4.606286221207579	4.051728331953022	4.31593601908185	5.414914586974327	2.7463088915464406	4.370163940578896	4.3827016945145285	4.363722050306321	3.985643570852133	3.6886870689383056
2,3-Dihydro-2,3-Dihydroxy-4-(4-Methoxyphenyl)-1H-Phenalen-1-One	0.035339999999999996	0.2202	1.5022	1.3117	0.8816	-0.1817	yes	down	325.081	5.1628	M+Na-H2O	C20H16O4	0	52.5	3.978	0.7081	4.512	0.5629	4.4234453575540105	4.56376193493775	3.6005754377480934	4.682090029926634	4.430873833292308	4.646818524052388	4.6313915657866	4.428798165288294	2.8565022426305866	4.764230003892732	4.829031256754333	2.9229265392683264	2.867274595983884	4.486863393129131	2.9763743512517893	4.631545173118878	4.509218288272439	3.0492745223158497	4.195211353713408	4.521393359940813	3.8436535492796002	3.9566584475939535	4.203160667865133	4.307298889217998	4.865222958107852	2.76720079170732	4.794255386066649	4.566099931118732	4.830559268580672	4.6659448170546085	3.0032275524321683
Arg-Pro	0.0253	0.1957	1.4983	1.11	1.0777	0.1079	yes	up	272.171	0.6287	M+H	C11H21N5O3	75.4	0	5.912000000000001	0.4462	5.486000000000001	0.5543	6.0905679620042505	4.878244368893281	5.590486495098591	4.725792293918705	5.019096276564592	5.509456615132391	6.375297517558306	5.514793797167525	6.082883928122246	6.043468930781617	6.2684157172501465	6.152491253625864	6.257189935991808	6.0460970876821785	5.320220667513985	4.9490286100317595	5.943793001124092	6.420537963677274	5.834506243159517	6.275749474516902	6.06235523540829	5.992366229216873	6.1994222123242215	5.401447123001381	5.416125774512908	5.219768892615621	4.944141311923629	5.131878949612182	5.853181563440224	5.020545064060737	5.745228662792765
Glycyl-L-Leucine	0.0057399999999999994	0.1306	1.4975	1.0183	1.07	0.0976	yes	up	187.109	3.3123	M-H	C8H16N2O3	93	0	5.505	0.2274	5.145	0.4457	5.3369458354780805	5.142121868826833	5.135432436051633	4.77634764543193	5.223136122361568	5.101258741778323	5.699807310388588	5.525838916903273	5.470750297622971	5.754059454000692	5.647329823964927	5.540307016231109	5.712250860389974	5.306956241567464	5.084623342441087	4.557214285903148	5.6034142350885725	5.601270612879069	5.4953310978628735	5.861929201422073	5.415386276106512	5.6809598508380725	5.6675203889796775	4.8634549780238885	5.24206840773655	4.66016282838004	4.967993482751661	4.8742780420583225	5.445154693162767	4.458891826588777	5.14433581635488
3-Hydroxy-N-(2-Oxooxolan-3-Yl)Hexanamide	0.001419	0.08304	1.4931	1.1208	0.8996	-0.1527	yes	down	216.123	3.9807	M+H	C10H17NO4	43.4	0	3.198	0.22899999999999998	3.555	0.3359	2.8110098655132068	3.0062463261276986	3.3605828629692605	3.696688558330449	3.509093395747987	4.203538633582505	3.0338844345557052	2.9044149915196438	3.0182945355761657	2.893059192157325	3.0899039892925866	3.1231146261723994	3.375558859226192	4.266249606047628	3.2918851750118763	3.9295066883378578	3.419104209839937	3.02930419146637	3.310133493739188	3.34377745909393	3.4038780012311074	3.2020261033812827	3.627738852088665	3.492578622477432	3.3936920483215407	3.1037289156278	4.028559833507532	3.459011526139644	3.251589060862216	3.73280250709812	3.2652918807831828
4-[(2,4-Dihydroxy-3,3-Dimethylbutanoyl)Amino]Butanoic Acid	0.0374	0.2239	1.4909	1.1914	0.8885	-0.1706	yes	down	234.133	3.986	M+H	C10H19NO5	0	61.4	4.39	0.6757	4.941	0.6992	4.592996342639939	4.889443377825293	4.8679032659939345	5.2552948817683	4.67485355641115	6.0644415643550325	4.746857815145064	4.951387069089791	2.7554950997227694	4.842318869609028	3.2614107539033474	3.6591776400928713	4.4163542667596865	6.082621149262259	4.324515858757288	5.6931191992235	4.643875159680342	4.437403689244342	3.9082126648793247	4.770362954865844	4.947304865107657	3.431569614886816	5.292619774986808	4.993994151151796	4.45142666113142	3.2766392693760134	5.887176126024706	4.990245396816205	4.437409486806732	5.238039607379449	4.810804435999311
Gly-Gln	0.02829	0.2032	1.4908	1.1553	0.8973	-0.1563	yes	down	184.073	0.6485	M-H2O-H	C7H13N3O4	63.2	0	4.1160000000000005	0.5792	4.587	0.5078	3.7748698195660237	4.5378999924792005	4.6042007310173885	4.435081136925756	5.170980937350848	4.40437058824123	4.185457797027474	4.53897241437415	2.8768331070111235	4.357303491937037	3.470414392958864	3.7445444411551847	4.24120203030195	4.267552269080531	4.185081738364447	4.9757730911477225	4.715033544599825	3.8898079406352077	3.8301597998245587	4.5890079090078215	4.432968728015328	3.0110331260009264	4.051076025315417	5.077522333391183	4.585335875259603	4.100357716154436	4.978887053118398	4.688620974691301	4.419879700680694	5.033523745738775	4.778230898520462
3-Hydroxy-2,3,4-Trimethyl-5-Oxooxolane-2-Carboxylic Acid	0.002494	0.1031	1.4897	1.1612	0.8886	-0.1703	yes	down	169.051	3.489	M-H2O-H	C8H12O5	55.4	0	3.04	0.3283	3.4210000000000003	0.2821	3.2112271075757186	3.350844627136746	3.1919771123365486	3.4547471063630466	3.1408113095170362	4.199089646339003	3.240622332659417	2.8629212416114505	2.2239976904141567	3.4481466604922404	2.9549672683487307	2.386126185808877	2.959259200426237	3.6595418267584776	3.1033304946858737	3.9819839281657416	3.4755193807826137	2.605921773685556	3.0117233964776964	3.1063563049667824	3.1808919582952813	3.1343296011396404	3.179107187044216	3.6582831217151135	3.1649187218994075	2.678506792442877	3.753022383741516	3.4843053239635267	3.7146973417307136	3.6767384635239213	3.3619169673683795
Val-Glu-Ile	0.0154	0.17	1.4891	1.0499	1.0944	0.1301	yes	up	360.212	4.4624	M+H	C16H29N3O6	73.9	0	4.766	0.3379	4.355	0.5546	3.95297124925744	4.730716346695898	4.871611737233021	2.8301933386430487	5.276486648118502	4.411548710447891	4.946069396689331	4.752419956640722	4.725741750227134	4.753185374090662	5.224317397144504	4.557155192173061	4.869453526435913	4.523819084525521	4.4871388803368335	3.588526678807092	4.794245148226321	4.978746403881278	4.833363213750485	5.368801055438793	4.41235930738733	4.704259452607321	4.3170509688240735	4.4912090161130935	4.762775950343512	4.209528912621738	4.319917601469792	4.1782342157490575	4.917060176177215	4.0944794330387415	2.9430555907616784
Galactosylglycerol	0.02851	0.2038	1.4878	1.0735	0.9068	-0.1412	yes	down	253.093	0.6432	M-H	C9H18O8	0	47.5	4.775	0.5107	5.266	0.6713	4.503040498444283	5.4108278613092295	4.9604382787806065	5.899083546451534	4.999318162919887	5.120468362834788	4.814401294675277	6.0854996670927415	5.204870010424441	4.751808999275756	4.244409905534046	5.432858283141627	4.900318325642691	4.6426272676558495	4.221487907330097	5.4216490303974725	4.840532067302346	4.504606839432952	4.282984392004774	4.636822001934521	4.049733859466144	4.2121954095609935	4.676765216774587	6.050893077580192	4.771801600417687	4.440174039459122	7.033063271941482	5.034599455520919	4.9787162098685664	5.176134781223457	5.192485188735953
Glu-Asn	0.005563	0.1303	1.4862	1.0056	1.0729	0.1015	yes	up	260.089	0.6218	M-H	C9H15N3O6	57.6	0	5.107	0.2749	4.76	0.3687	4.761680528161281	4.946733739716289	4.474795032923441	4.670563887429123	5.329438493348323	4.909629306748748	5.036877424580394	5.3083608733557845	5.075404426395283	5.39818385144536	5.134034150471967	5.154378358144459	5.1653086181262005	4.847883398734078	4.806977438623472	4.806965920996608	5.000137177031868	5.526851898671185	5.0140392509652365	5.42426877423759	4.8250728639535945	5.507784158420772	5.139780309124887	4.4474253714950995	5.041585586690837	4.575958266428232	4.759967696979852	4.427260860867847	5.318546734290749	4.22081288130382	4.675530921209073
Lys Asp	0.01769	0.1763	1.4856	1.0288	1.0761	0.1058	yes	up	262.139	0.5756	M+H	C10H19N3O5	54.3	0	5.457000000000001	0.3424	5.071000000000001	0.5147	5.452378813141433	4.627841230315653	5.4656394935312855	4.114950450823844	5.337025445893124	5.660374421979007	5.800199795925697	5.856914093316712	5.1710444894553085	5.067937778600908	5.5312914062638185	5.508110477802017	5.645939825792958	5.2457325678507445	5.387240814067801	4.497598888341648	5.2993547307050894	6.204149352918915	5.232389099516501	5.889093846530652	5.288436578477142	5.451214460538154	5.45796438263625	4.488043787664638	5.263499029141539	4.876125217688231	4.759655503769049	5.369596025480209	5.831416724096696	4.781673797688467	4.793496200991469
Tilisolol	0.04545	0.2425	1.4855	1.1313	0.8618	-0.2146	yes	down	349.177	5.7224	M+FA-H	C17H24N2O3	0	69.7	3.0860000000000003	0.5968	3.5810000000000004	0.7092	3.7262128299975887	3.802588597901367	3.2326320973285334	3.638728900362629	4.124678961170325	4.1552452093097285	3.2411677559051464	2.9388165512616182	2.4327553726224864	3.2091078255464813	2.3096146149756627	2.385739509269332	3.793991053643672	3.3547302305406563	3.823543858942276	3.403993940112964	2.8394591518776298	2.47021970552763	3.2964031763709483	2.446234773835249	2.5894346176625254	2.437569399157651	3.5341445901674122	4.60258874081778	3.0506984699545274	2.1864064110027934	4.003125344126598	3.510800789300939	2.9791254559668765	3.672734290700221	3.6155732223034978
poststatin	0.022680000000000002	0.1903	1.4846	1.12	0.9081	-0.1391	yes	down	605.365	6.1633	M+ACN+Na	C26H47N5O7	0	63.6	5.1080000000000005	0.5606	5.625	0.6172	5.2257042324671295	4.9193909545504315	5.4318652511635435	6.1297295403422245	4.627680545335707	5.986921502972976	4.090085535804456	5.54485982546278	3.958488511864561	5.436375282269287	4.922255836965414	4.883946154591412	4.6771791329032295	5.9105681772736105	5.395545811605056	5.983785798189287	5.9056233228517225	5.584734267462026	5.272723008335255	5.7438701311086	5.4980002220924735	4.3454327609743535	5.591085547885255	5.227126015071059	5.156853586099656	4.859183592638827	6.3384103296472025	5.897718575847603	5.753165919592679	6.695823928762916	5.7970493106146375
Thr Glu Phe	0.01275	0.1609	1.4835	1.1224	1.1048	0.1438	yes	up	396.176	4.013	M+H	C18H25N3O7	59.6	0	4.574	0.4191	4.14	0.4805	3.5569887625045062	4.465825008552372	4.070712579435567	2.9922628255971033	5.073752964926748	4.452028522520059	4.810609733647357	4.209079335113897	4.985315837525722	4.846282299322994	4.636676632608401	4.753432530522165	4.575934799298516	4.275962035750953	4.8018544311250055	2.85894547757642	4.798483069139375	5.171726444231608	5.011364061128369	4.3447601115613566	4.061793074973783	4.572521604836964	4.1515433997647415	4.174519113124032	4.68564603716456	3.775479298278212	3.5142366331462385	4.047199428849804	4.912137211282767	3.5328548192121456	4.251825748192712
8-Nonenoylglycine	0.03148	0.2112	1.4828	1.2768	0.8741	-0.1941	yes	down	246.17	5.3554	M+CH3OH+H	C11H19NO3	0	55.9	3.438	0.5826	3.9330000000000003	0.6127	3.3189070063728963	3.9268116407262026	4.085099336440718	3.963502959931185	3.718902077055645	4.812800722616784	3.3310925760725967	4.368983449079234	2.5044753629910144	2.950220056777233	2.6816010060759874	2.7789640868119885	3.8739252507074045	4.526659745814241	3.926164956119525	4.472657879753643	3.953697738717021	2.696976569989835	3.5463839074783894	3.69604644420666	3.4023928197550286	2.576599126258824	3.9855791390931135	4.331506174727413	3.694938918262894	2.415346464124759	4.698601728271888	4.34437257278697	3.3376737360163853	4.786913151932741	3.982485218188168
2',7-Dihydroxy-4',6-Dimethoxyisoflavan	0.01072	0.1528	1.482	1.8691	0.8968	-0.1571	yes	down	347.114	4.4449	M+FA-H	C17H18O5	0	43.2	3.947	0.4177	4.401	0.5011	4.231512417426816	4.440458670472792	4.318374838355493	4.320021650216781	3.0570699419111587	4.331745707244984	3.9810502323489376	3.8430121962563266	3.2303994503708706	4.420672711967541	3.7922878957278434	4.002545035132761	3.5422371150182577	3.931693061880986	3.5806059611197765	4.261075196280721	4.296998895832132	3.7592879283260636	3.7478634902239096	3.7379120751924737	4.5631566726203605	4.359275523791207	4.089118332436404	3.9571445865543047	4.0959094678529855	2.500404445461861	4.371836758506501	3.9946185708516815	5.470173894657408	4.312890090044314	4.229945667674083
3H-Dopamine	0.032189999999999996	0.2127	1.4809	1.2333	0.8984	-0.1545	yes	down	156.102	4.0771	M+H	C8H13NO2	0	46.2	4.1930000000000005	0.4726	4.667	0.7042	4.0826288235673545	4.6687413708339225	4.6411218435547195	5.888425937203545	4.523881565636118	5.093802229393104	4.512835427450507	4.623541599765443	3.564998667397721	3.7410947172934628	3.2823703734038085	4.165357176871272	4.087524558513204	4.995442573033481	4.801308605105418	4.840395604376997	4.0733833547940135	3.912875576904273	3.606124293804797	4.002492715399658	5.1034657854261205	4.316195857619905	3.9559735044584032	5.47952633692771	4.138567218242248	4.3822915443326815	5.400566118160709	5.062179947337407	3.7432572030162685	5.387777149762738	4.145970551786506
Salmefamol	0.02333	0.1916	1.4792	1.0469	0.8964	-0.1578	yes	down	332.188	4.4196	M+H	C19H25NO4	0	52.3	3.91	0.5496	4.362	0.4431	3.1199515778752027	4.392656763404643	4.3853502598041585	4.533092432983012	4.636710955203548	5.4158304872654455	3.9344634536777345	4.319809341027455	3.572346075616136	4.418908512269251	4.3186821281022505	3.21076107916536	3.532715038854833	4.636812264794031	2.787418007975996	3.946490899333837	4.081865201697114	3.805007054634493	4.546634654930681	4.266878226977096	4.012495777570141	3.1122923251479166	3.8392083949039573	4.261184879583325	4.074416752863781	2.578399246588382	4.313915173136373	4.133984027824247	3.950238845892094	4.856776616000695	5.176745874500722
Val Val Asp	0.0195	0.1823	1.4788	1.0166	1.0859999999999999	0.1191	yes	up	332.181	1.7973	M+H	C14H25N3O6	64.6	0	5.012	0.2261	4.615	0.6455	4.990982789573815	4.863412862178032	4.958009857164619	4.064402757318547	4.663874633255167	4.879353859142727	5.472923876206104	4.9345390658561135	4.8397229277744405	5.179582126121452	4.830596449048289	4.809411188723409	5.030876244720036	5.093030294138831	4.849101959020676	4.411060187773471	5.1740939973552775	5.262326732765052	4.723152360956438	5.24306120884873	5.2730609598160765	4.846727493919323	5.2865745521515	3.7241420502497	5.086518494235086	3.5148740204482722	4.8632269279285545	4.755736678907826	4.823071117078516	4.04657515682145	3.861149284542567
P-Phenetidine	0.03105	0.2097	1.4785	1.14	0.8624	-0.2136	yes	down	170.117	4.6765	M+CH3OH+H	C8H11NO	42.3	0	3.02	0.4614	3.502	0.7254	2.6603153313370096	3.6387653904259287	3.4784812068544944	4.770348917422008	3.1130187329019967	4.041342208566677	3.157856654108875	3.538520947475162	2.7816001363032687	2.6815606301600368	2.520302594340044	2.7932859356119253	2.939799996126805	3.7305676901155764	3.79934001572366	3.7060824462888164	2.617676754732699	2.535663985141098	2.516266656273835	2.8446949102125667	4.0040474372304455	3.0263015016517696	2.7407864558900883	4.360805933527115	2.7372117362126747	3.292155961195561	4.107994667896523	3.929604952308985	2.753506023472416	4.274949849840941	2.489715227885749
Ile Ile Leu	0.04741	0.2463	1.4773	1.0136	1.1156	0.1579	yes	up	358.27	5.5314	M+H	C18H35N3O4	81	0	4.583	0.6076	4.1080000000000005	0.647	4.063340389712413	4.39597485661074	3.965399689717464	3.2435884217935937	4.883829878037111	4.554637894829047	5.755950831356198	3.8591769485884497	4.4451076472093085	4.705195226409536	4.872789765812295	3.3548055812729216	4.524114048982732	4.75187804925436	4.066450590001092	3.374058354955418	4.692914237410907	4.102624673750828	5.396447015151482	5.374387678165092	4.500890049447682	4.860941697011691	5.258396524557207	4.325061193408452	4.297627859966968	3.3407828618180013	3.3973840581754686	3.3485528986786965	5.0173520141136345	3.7886818445576673	3.3565410181233997
Asp-Tyr-Gln	0.005034	0.1275	1.4757	1.0342	1.0844	0.1169	yes	up	423.151	3.1672	M-H	C18H24N4O8	51.7	0	4.495	0.2334	4.145	0.4113	4.567914988430174	4.277483196034441	4.154749349289735	3.2733130960598333	4.368547542799922	5.09299229756248	4.569459584534999	4.85263312671105	4.46074393025371	4.489747466455956	4.593708958055743	4.283999493023947	4.496900798913672	4.023366827734553	4.4425893503297615	3.7470194011595206	4.5009270030488535	4.723073561020872	4.444471815592056	4.837846765545059	4.0074902100893866	4.927528698269285	4.406836715731038	3.885186035625353	4.229992285489522	3.8006737424401145	3.844706675789989	4.958746285317188	4.61050184786951	3.68530006816323	3.73787216458168
Val Pro Gly	0.007443000000000001	0.139	1.4743	1.0046	1.0704	0.0982	yes	up	272.16	3.1683	M+H	C12H21N3O4	55.1	0	5.365	0.3008	5.012	0.3805	4.903244671315716	4.7608029707165525	5.537233432599387	4.415655695650269	4.967059358582212	4.987727670319809	5.456496607186669	6.0640735327862325	5.319240338139653	5.485379378480989	5.316863401314683	5.678694578946378	5.329437981568158	5.2050767097528015	5.174000697911548	4.6153807637228965	5.4042587158948265	5.573659292870014	5.381806202704391	5.656058110819522	5.095227331481432	5.3901854843819095	5.445555776197286	4.751621646335051	5.44356647713505	4.301430347538143	4.957665836695528	4.860309442456298	5.2696560245367925	4.633606604891956	4.865571916175325
7-Methylguanosine	0.02638	0.1982	1.4736	1.089	0.8944	-0.1609	yes	down	299.123	3.4036	M+H	C11H16N5O5+	0	57.3	4.152	0.6285	4.6419999999999995	0.4513	5.041839350783596	4.323646531633653	4.7544006598363335	4.6352799356688035	4.132658479920835	5.434875392074258	5.238494480706943	4.403643101904332	2.8314539478901475	2.900993168670328	3.971103327952125	3.9200001675262035	4.198689409594866	5.153155534561682	3.9460067573754842	5.0693973156773495	4.656991910769174	4.55614335099074	4.1056797849276725	4.3193494936962	4.299483016642949	3.2864966041224424	4.00318839391039	4.429813846446451	4.3849897729289085	2.7871138136947406	5.040806174539124	4.3873044491867725	4.846767082358942	5.4441304021423615	4.754709102347224
Val Leu Gly	0.02027	0.1839	1.4725	1.0084	1.1001	0.1376	yes	up	288.192	3.2273	M+H	C13H25N3O4	59.8	0	4.452	0.3006	4.047	0.6174	4.243963454509806	4.1685322564801135	4.319528462451788	3.410584898002317	4.256192940439118	4.666219969469379	5.096059900813267	4.487265574162415	4.485494905980622	4.644585160542227	4.337750725320678	4.1979780256263615	4.651958130034781	4.834971005308205	3.7629795101974888	4.057225584965897	4.65204413161015	4.485015709242548	4.352273235342285	4.968344150530092	4.527201479252389	4.285756343612099	4.674229442294598	3.4761413302822004	4.3075551388201205	2.678905484461899	4.031970435613716	4.009811590953638	4.193289179955881	3.64425950406062	3.7891305804811366
Trp-Phe-Thr	0.04891	0.2491	1.4724	1.1267	1.1365	0.1846	yes	up	435.207	1.7546	M+H-H2O	C24H28N4O5	43.2	0	4.337	0.7718	3.8160000000000003	0.5171	3.795318770779647	4.009169489327278	3.4053827667532124	2.805157622846989	4.057626214830187	3.6638110539180393	3.593536006593636	3.524053795022964	5.0313198038999305	4.104199976875666	4.288603713447087	5.585472082334796	5.1222798114483306	4.005826935977149	3.9564380413766362	3.546014637680666	4.177950102415572	6.296863296538187	4.418047223904326	4.053489912649087	5.2741518079486855	3.8530300824481385	3.848881205909197	3.8949996823431983	4.2549070470349974	4.9732255190945205	3.4706718493359823	3.687057919609628	4.38387839503848	3.748034448894955	3.8003309985749065
Dg(17:2/18:5)	0.0371	0.2235	1.472	1.0776	0.9274	-0.1088	yes	down	597.448	6.7051	M+H	C38H60O5	51.1	0	6.574	0.7595	7.0889999999999995	0.36700000000000005	6.54860268060387	7.054847279904388	6.208768675957982	7.478997177828036	6.675184260454648	7.247167547095332	6.3987191153238125	6.748638751727551	4.023159027272755	6.7879762829104555	7.053203904785872	6.650761511993601	6.154828561332548	7.3310684477258805	7.004965377045674	7.376983546807518	7.483126219218148	6.924463226154924	6.757109374879178	7.345871032480861	6.853848986866526	5.516309441073315	6.716958212968618	6.699660095698158	6.811338057125666	6.8946621494013085	7.358602600808543	6.860144560087093	7.169041931465246	7.902877851482343	6.969849126786561
Hydroxyprolyl-Arginine	0.04381	0.2387	1.4707	1.0323	1.1216	0.1656	yes	up	270.156	1.1146	M+H-H2O	C11H21N5O4	0	52.6	4.343999999999999	0.638	3.873	0.5492	4.511049283625047	3.649610493998875	2.9977987857053052	2.8868154578157244	3.550745576858123	3.6724747409040033	4.566764685531746	3.967809853861082	4.56900844532993	5.415732877643919	4.494491970687879	4.265228390643552	3.557294524005248	3.7663451408448214	4.975863845789979	3.468760101054176	4.834372697694973	4.775579056610899	4.354464602128986	4.615473061426862	4.031272718511455	3.9646341555566975	5.437215626191176	3.923998980839008	3.732520053821071	4.098892342531529	3.040516870977385	4.2445850931620015	4.845115205487286	3.8768686897262494	3.1559027607250183
Sabine	0.03734	0.2238	1.469	1.1715	0.9037	-0.1461	yes	down	530.286	6.538	M+Cl	C27H45NO7	0	46.8	4.6080000000000005	0.6925	5.099	0.4444	5.283304554877873	4.9562635136105895	3.6962277375955566	5.858476169278195	5.614182842855956	5.275932209832144	5.822723932002377	5.338840095213835	3.586952492922572	4.424976522507898	4.229676960803238	4.520310087978466	3.897824733053567	4.602861240653366	4.221876645557183	5.696779686962778	5.256926263625302	3.8249996198817997	5.0899719800397705	5.104188751766928	4.659310754760381	3.8001203271610833	4.215762912760283	4.887823273522172	5.216284128570861	5.279213990795667	4.883092134159184	4.401545595018671	5.601916509009234	5.0387126395896615	4.778670403846219
Val-Ser-Tyr	0.02043	0.1843	1.4676	1.1562	1.1043	0.1432	yes	up	368.179	4.4251	M+H	C17H25N3O6	46.7	0	4.435	0.4316	4.016	0.5119	3.907822031297024	3.995214885579564	3.667216513053954	2.700905849112301	4.3920803365940255	2.8619843666120754	4.288129962892573	3.895512866752364	4.96544331758102	4.788855697108978	5.045567923219161	4.8822896196184935	4.626942805039004	3.634428984988484	4.280941020102986	2.8972478884023656	4.193428850595715	4.366708059668567	5.025204226274856	4.709164431696451	3.8703971936744006	4.746120277253878	4.6235610697037774	3.926069344701512	4.514499240568863	4.035450074726102	3.460489881861767	3.6853935854119135	5.008860851715268	3.34321939755598	4.246728765033499
Thr Trp	0.03254	0.2138	1.4671	1.1717	1.105	0.1441	yes	up	306.145	4.0664	M+H	C15H19N3O4	70.9	0	4.86	0.4582	4.398	0.6913	4.422033543296776	3.8904268878058335	4.267740592622857	3.340614148827149	4.837608161182708	4.8592876623634185	5.1561204305656485	4.6015957369778535	5.199067125477352	5.187239982989579	5.2957078070072106	5.376554895056641	4.815107604814607	4.538066192575388	5.142876140768007	3.708266512495464	5.0698574908822645	5.426527065203646	3.930641053156076	5.0251018892733565	4.673750785425232	5.159871231518286	4.868247620612512	4.423795138569276	5.338730709247374	5.248474813593806	3.034345297201796	4.168927920088883	5.262694435802773	3.878051011293589	3.584860933448156
(4E,15Z)-Bilirubin	0.04257	0.2367	1.4666	1.0345	1.0869	0.1202	yes	up	585.269	6.0622	M+H	C33H36N4O6	0	63.3	5.818	0.5058	5.353	0.718	6.2761738698610685	5.5107068053142525	5.919844510677668	4.81978009083909	5.475447494505992	5.6545923810685625	5.5660676530741915	5.583827088398049	5.748892261038978	5.899452315892184	6.146098357103595	6.211907238072526	6.653460710585938	5.371605041723203	6.243152032583518	5.446577158295032	5.267953455782212	5.944958091127589	5.9231748941012015	6.1725333643086575	5.8728434253178445	4.2559224097718085	5.8722431201118255	5.8414595891937005	5.237081044357548	6.0190488832363425	4.279816937101929	5.895624465598633	5.800237453836483	4.862753001363161	4.44189514622693
N-Methyl-L-Serine	0.009631	0.1505	1.4647	1.044	0.9117	-0.1334	yes	down	178.072	0.5526	M+Hac-H	C4H9NO3	37.4	0	4.016	0.4026	4.405	0.3399	3.891311410040685	4.5320942704347384	4.351683768920286	4.375687932833126	4.4081080681174365	4.879728914765038	3.8513672293045085	4.279080429706808	3.7471540296052623	4.022896297417942	4.333709466012567	4.525197953131483	3.5437407029264345	4.439916350343859	3.975148756924094	4.49269343265275	4.312763091625467	3.8338091913891454	3.89406816301662	4.5823987321110495	3.2249957431772	3.4613839793600945	3.541607965883121	4.542966542550007	4.336956135275801	3.440287446727206	4.477483791047224	4.397239652903951	4.655356403243818	4.660771456847772	4.516772163075352
Hygrine	0.008865000000000001	0.1467	1.4638	1.0239	0.9233	-0.1152	yes	down	186.113	5.4978	M+FA-H	C8H15NO	0	68.8	4.6080000000000005	0.2682	4.9910000000000005	0.4929	4.693305834122191	4.779858691825688	4.239448318833018	5.109955278948905	5.039315267662526	5.248768435137307	4.627261409904452	4.552297592963242	4.308542930828353	4.617171537767353	4.789669904670877	4.424915041267296	4.5698101812161385	5.152122090941303	5.260780306729219	4.9628800644414754	4.532440803267646	4.954785682886435	4.594086784406119	4.33845330560808	4.5566481824790825	4.3334834435233045	4.339834470005357	5.062944346331297	5.5219652953903005	4.377843861176565	5.237176747295794	4.829490118854204	4.089030098479257	5.469999711633442	5.14929875072895
Embelin	0.02021	0.1837	1.4615	1.0923	0.9259999999999999	-0.111	yes	down	589.37	6.2322	2M+H	C17H26O4	0	46.9	5.827999999999999	0.5582	6.294	0.4321	6.002102080248824	5.862597292382902	5.8233012335316205	6.6679497326928905	5.784111743654963	6.597933169253201	5.2730516013861575	6.147701057879669	4.463654352127809	6.129820298230437	5.443713544304502	5.934373690912548	5.720968472899513	6.604307888200731	6.292966639843797	6.6148417796105985	6.570724457990303	6.202378521988188	5.986035289128656	6.368861547897242	6.120328250392343	4.53598441623384	6.076051980377942	6.187807502258179	6.070528446632105	5.442468967458538	6.796053857091426	6.443095143693053	6.232058517625759	7.1457159892180595	6.217399131040658
2'',6''-Di-O-Acetylononin	0.04388	0.2388	1.4578	1.5219999999999998	0.9069	-0.1409	yes	down	513.145	0.7076	M-H	C26H26O11	0	52.6	4.677	0.6867	5.157	0.4849	4.582601641246775	5.553548667850372	4.641947885639118	4.893385267031553	3.366314857063613	5.409047904255152	5.3330623548278435	4.847864571644103	4.3209691401942365	5.0652484691821344	4.709574319927712	4.890336868377913	3.2020716000826104	4.8328110178593935	3.8071677262762185	5.402095660231692	4.894072649072951	4.539099259953182	4.92239401981398	4.178921726406795	5.135462025610806	4.919647936823703	5.95426695966247	5.142827344695332	5.949415258064578	3.7745179770142996	5.450235655992747	5.136121475949532	4.392511083714851	4.379556525588582	4.927340634170089
2-(1-Adamantyl)-1-Morpholinoethan-1-One	0.03827	0.2263	1.4564	1.1892	1.1552	0.2082	yes	up	281.222	5.2162	M+NH4	C16H25NO2	56.3	0	3.9219999999999997	0.7431	3.395	0.4912	3.5838732282291743	4.057861603941791	6.055990762884548	5.373882934393919	3.342263757993263	5.325997268133028	3.5383892127122314	2.975467417152321	4.52357590230471	4.4615529729041326	3.5350563400874973	4.066587646674039	3.80144329662215	2.821177561729173	3.710969939378925	3.0893044547794686	3.9531943254721136	3.2832036075857003	3.525929539196005	5.274640485215142	3.198285696039757	3.974273227746864	3.6573287403848833	3.395167596798016	3.9233862090774045	3.8727142782264217	2.8819317161379665	3.703091421584989	2.8976659067587414	2.8516575044794013	2.841127742031755
Ile-Val	0.009188	0.1473	1.4555	0.9788	1.0698	0.0973	yes	up	229.156	3.4034	M-H	C11H22N2O3	79.5	0	5.442	0.3208	5.087	0.3819	5.112884889122033	5.021050494815578	4.754272508306288	4.42023613693386	5.463887921816188	5.242952787633387	5.673327291307912	5.391541647541356	5.53220751272378	5.902525746287773	5.6855087452447854	5.5590342916395565	5.4833100501015775	5.240304237168587	5.062843990549545	4.462136464448708	5.538098846826139	5.238926372651873	5.107125898490633	5.971387257439258	5.459786214930458	5.691319412597211	5.748464090844156	5.099454161644113	5.5600293463895945	4.619344008800916	4.842439427164689	4.871641339082077	5.432756967094422	4.761643862313193	4.962869177387111
Gln-Val-Lys	0.03228	0.2129	1.4548	1.1563	0.8782	-0.1873	yes	down	374.243	5.6543	M+H	C16H31N5O5	35.3	0	3.512	0.4994	3.9989999999999997	0.7059	3.5419431333164972	4.114488582543477	3.418737575201337	2.8703964448669828	3.8842332525019554	4.405982548918924	2.9679986184118894	4.222505752377474	2.8365545533440835	3.861741701872336	3.123477919270284	2.9488604197771995	3.3641363572495724	4.195007452379253	3.4783317424505817	4.2254048413566965	3.637028118385365	3.029316636654133	4.0451495402273725	4.351479897574743	4.003050683543552	2.908789821133365	2.9963105725535173	3.0880298197125327	4.931044660977396	2.747259596142228	4.03989967373519	3.5891588111909987	4.199985035094106	5.178374163811597	3.7370538647748734
Oleoyl-L-Carnitine	0.03174	0.2119	1.4542	1.1795	1.0771	0.1071	yes	up	426.357	6.1792	M+H	C25H47NO4	57.8	0	6.444	0.4876	5.983	0.6479	6.482535624550319	6.541756761648887	5.990064230071473	5.170023284496968	6.253811206603251	5.7166981861279975	6.34214589268713	5.71723015260622	6.725098071874676	6.613450090964714	7.132631131064294	6.861014821376059	6.597061306161147	6.4970034376782415	5.8708577973301175	5.761770624795456	6.282519100285004	6.815991309868168	7.4846575686160275	6.972880200850757	5.865179020267303	6.045171282158205	5.8450630110342665	5.5820582663320994	6.434769268212391	6.384252304366625	5.19493755338163	5.515809266078676	6.9916059072527075	5.170743632267556	5.610128636606678
Ile Ile Glu	0.033460000000000004	0.2158	1.4537	1.0727	1.1052	0.1443	yes	up	374.228	3.6385	M+H	C17H31N3O6	83.8	0	4.654	0.509	4.211	0.5831	4.012627837565572	4.041702529951127	3.8896446652926495	3.440937376530566	4.3857101648252215	4.640523703873418	5.6723439715417765	4.405474306506582	4.545409948539702	5.110559776382457	4.787544402286622	4.134238372658242	4.640674591829163	3.94887129416789	4.074086617809588	3.5714308093404736	5.161598743312206	4.9613949051034245	4.767342200660246	5.2721405534413615	4.340283721219837	5.200396230632721	5.019127427535801	3.920687384650552	4.582431291476631	3.317660021780229	4.126808342741889	3.985181878264111	4.595928548601808	3.5644525845067565	3.692391181046169
Lasalocid A	0.01791	0.1772	1.452	1.0675	0.9295	-0.1055	yes	down	591.386	6.2588	M+H	C34H54O8	73.4	0	6.034	0.5533	6.492000000000001	0.379	6.2717180944338775	6.055013303987549	5.9968895799793085	6.797380518365473	5.97432711135541	6.684671989747617	5.236341132456659	6.3391882623658224	4.724639098062865	6.421403529537388	6.048972237333207	6.1801535743583615	5.9696473354825965	6.671805849112783	6.44015412389957	6.806282400651496	6.692929667742063	6.456987407814328	6.107018305660403	6.441340283290695	6.277655042056487	4.7124021638272255	6.3060047311090175	6.334895197553703	6.288542137691151	5.908306177008188	6.973931862310983	6.6413822561049445	6.501600474443616	7.204186529940571	6.321769177856318
Phosphoserine	0.02424	0.1926	1.4519	1.0716	0.9149	-0.1284	yes	down	186.016	0.5704	M+H	C3H8NO6P	61.7	0	4.449	0.5058	4.863	0.4127	4.5828282676436665	5.263126764108657	4.7363323333933565	5.482392701099682	5.396936709785607	5.483242351005449	3.2570170276177284	4.677531281611724	3.7465147410578417	4.017837061060044	4.704773382208468	4.371137613839413	4.3400799011306885	5.2928693666578575	4.885372433392654	5.511703804861256	4.5943792629111435	4.249333339791534	4.709328664427503	4.6143511400651285	4.128602390844868	3.966989467344659	4.28661603482646	5.1045791714959385	4.75460616170559	4.881295667961755	5.1272249186036225	4.681414725758168	3.897215503874368	5.285271027983075	4.903569732123179
Leu Glu Glu	0.04299	0.2373	1.4509999999999998	1.1451	1.0976	0.1344	yes	up	390.187	3.1846	M+H	C16H27N3O8	57.1	0	5.126	0.511	4.67	0.6890000000000001	4.158203395563404	4.495909704803936	4.545003471445958	3.57892769358042	5.40183111367795	4.632304208935358	5.2400833714699715	5.228284006550647	5.778432122644535	5.413130786754053	5.599550921572466	5.509786747727604	4.967668700415076	4.445791404534766	4.992472050220368	3.5808860250883754	5.449590539957291	5.986260184999084	5.377611329698476	5.04976548445634	4.322081655771127	5.374465380777107	4.505110498278217	4.6100554700067065	5.5655587082601405	4.935602275814894	4.019588398414173	3.7627464331378864	5.827744405723743	4.83973189785933	4.077430963787057
Orotic Acid	0.04559	0.2426	1.4499	1.0390000000000001	0.9055	-0.1432	yes	down	155.01	0.6485	M-H	C5H4N2O4	92.4	0	4.552	0.5915	5.027	0.6557	4.193415312516125	4.3770764254714125	4.415518347433612	5.7505114185261785	4.519793915819466	4.517657285012616	5.349904736448953	4.679727507961164	5.867786145054515	3.7668456108084887	3.903481209445215	5.180647040374047	4.992990836544187	5.41043022002143	4.7920031490399255	5.6216892435059425	4.425336186172354	4.577301408022013	3.9922411485966	4.047251844726425	5.011172320432538	3.4883103488056646	4.904092593289394	4.993915431736458	5.311915583115075	4.10244077056641	5.8069347600871035	4.75849271019303	3.65548705434885	5.140100547283129	5.286132950024912
Ptaquiloside	0.04423	0.2396	1.4475	1.1508	0.9012	-0.15	yes	down	398.192	4.2698	M+	C20H30O8	0	75.3	4.289	0.7106	4.7589999999999995	0.3793	4.622967331332462	5.0412704934622	4.836192894589934	5.154881960101381	5.50202523260212	4.585198792507014	4.469867300750134	4.478922435490597	2.834514836372044	4.782218348345404	3.011883504748199	3.3752165863569035	4.494242928376824	4.990614271409084	3.894581319055273	5.208804712207756	4.043145220815269	3.742471366411312	4.176751762608857	5.164451372525249	4.619527591185075	3.8219823544403684	4.578769579311522	5.020497457749538	4.325496291846468	3.7875760243319285	4.943161607376816	4.598008654663127	4.117789462135342	4.941382058652605	5.044763918968044
Lys-Val	0.025419999999999998	0.1957	1.4465	1.2283	1.0747	0.1039	yes	up	246.181	0.5862	M+H	C11H23N3O3	71	0	6.317	0.3538	5.877999999999999	0.6859	6.5937586585261165	5.4565059161901415	6.066631292388004	4.7076149584370635	6.20417522616394	6.8675147676711825	6.7996362909247585	5.847475788699329	6.495489279179715	6.526076169896897	6.516191732463295	5.981811365540223	6.423471713640888	6.2597285025799	6.469509011841044	6.0637111648535225	6.4864237053365805	6.362814981651927	6.450407813530292	6.902994537140289	5.8972304296142575	6.464328772693082	6.0833651131529205	5.6097071402663365	6.3680511538379	5.5745378533087075	4.923520299572299	5.73452714697914	6.2985072853420805	4.881629983594643	5.57350502014909
7-Hydroxy-3,5-Dimethylisochromen-1-One	0.01608	0.1713	1.4463	1.0522	0.883	-0.1794	yes	down	189.056	3.4516	M-H	C11H10O3	49.2	0	3.0580000000000003	0.4149	3.463	0.4536	2.4770945285344457	3.986440299359897	3.518908437482457	3.624217015247986	3.300982604492286	3.7136011539714255	3.0290093387818504	2.844712618795929	2.860418294176533	2.9579075651405864	3.1522261831347915	2.3551424584033023	2.8498352006220613	3.358331130739564	3.1116555106483466	2.915800484883884	2.920471412940508	2.6483932134906345	3.4364453279930323	3.4043784648068334	2.4969509826607084	3.267366053035913	3.4750105826781508	3.5799664776021043	2.33595285821341	2.2581972687860428	3.8632858826587135	3.3420859837454566	3.100310337016794	3.704903823103949	3.7570281078458025
Asp-Thr	0.01383	0.16399999999999998	1.4445	1.0259	1.0705	0.0983	yes	up	235.092	0.6234	M+H	C8H14N2O6	82.3	0	5.585	0.3239	5.2170000000000005	0.4578	5.460256874576877	5.013376518555907	5.220635465420068	5.16156024145548	5.122425731493268	5.57526250859254	5.767758375393638	5.390705118782767	5.552995448718119	5.809490176529255	5.4981899195034085	5.785101731647378	5.793126305921768	5.2053612413935335	5.297008297561481	4.97085682760154	5.723477358604221	6.430443992352238	5.4283886978882805	5.919410206532936	5.5652315460544575	5.569462669239682	5.763535974799797	4.833625477857268	5.505169610018323	4.944816520727876	4.74616227677129	5.103162347988134	5.865442247845794	4.6750544544885315	4.891041482353578
Val-Val-Ala	0.03157	0.2112	1.4437	0.9648	1.0874	0.1209	yes	up	288.192	2.8899	M+H	C13H25N3O4	55.5	0	4.927	0.3622	4.531000000000001	0.6173	4.81284535323676	4.321071153903799	5.184851557966631	3.024169924013388	4.474463439629663	4.8741524888833245	5.658962613593722	4.815067488082121	4.849790651669018	5.109128811154541	4.960760249110164	4.573178107680167	5.020208478772771	4.776585305877734	4.142188318967583	4.211675055721921	5.1275106347458586	4.853554451537749	5.063650914321047	5.356636907793691	4.9774126760751045	5.054660192135242	5.248521544354438	4.403575088093524	4.573167499580627	3.1801907058043706	4.5117610227402585	4.243981049382349	4.910706907827667	4.349074911087472	4.168085643125329
N-Benzoyl-N'-(1H-1,2,4-Triazol-3-Yl)Thiourea	0.004435000000000001	0.1233	1.4431	1.01	0.9264	-0.1103	yes	down	246.044	3.1942	M-H	C10H9N5OS	46.3	0	4.319	0.3074	4.662	0.2905	4.356080282601494	5.083016354741619	3.81651838741818	4.8261609825005936	4.3027395848585215	4.937445423064442	4.495474173982548	4.536844471035425	3.980321164892948	4.852371896056488	4.273808583848875	4.06565896229753	4.261370422283604	4.869185818349222	4.302242945540345	4.8657230359747405	4.554559015937507	4.361083711512716	4.19394581748353	4.142291286521586	4.26842992363889	3.8641372147387703	4.356084125530494	4.724552444097261	4.695327518568184	3.988182827642552	4.8012538208288245	4.741435537747647	4.454616606005005	5.0093755434683125	4.9896831399235735
Acaciabiuronic Acid	0.000759	0.05924	1.4428	1.4527	1.0598	0.0838	yes	up	355.088	0.6271	M-H	C12H20O12	0	42	5.39	0.2492	5.086	0.1569	5.3089078879369485	6.089112323811093	5.237508050554764	5.393199121487229	5.065699234056869	5.439335551565498	5.290500657416004	5.282698437069635	5.094504283772603	5.2085881218971775	5.682862595084377	5.5584959496542465	5.372241964252738	4.904533500207505	5.0347892963482215	5.239590252848009	5.360896149632133	5.369930922220746	5.583152128701159	5.4948793150742485	5.581501342919852	5.50824125345947	5.280890343642503	5.106994421425645	4.701794509748804	3.732512015614581	5.1130912952750025	5.17613507391543	5.066546674818704	4.8681870019719415	5.2176654799237685
N-Acetyl-D-Alloisoleucine	0.005964	0.1306	1.4407	1.0293	0.9295	-0.1054	yes	down	172.098	4.8191	M-H	C8H15NO3	85.6	0	4.631	0.3031	4.982	0.3486	4.559058705900348	5.256520371994919	4.221790790272158	4.9567465813511085	4.962512833593837	5.290185770759393	4.5793704044298025	4.461725026070608	4.343827574817384	4.723542108373814	4.851176182860877	4.4806496889222736	4.507120209443738	5.0284937806356815	5.140551430670937	5.260439509405297	4.406780484995783	5.013729282605129	4.786718667663736	4.583340412440975	4.600696619941738	4.204556786967388	4.305978475425492	5.062632524542852	5.205981706332173	4.5003258268188535	5.162658280118054	4.802067448232591	4.366249362560239	5.285350319574588	5.243115148059493
Ile-Val-Phe	0.0453	0.2425	1.44	1.0038	1.0972	0.1339	yes	up	378.238	5.414	M+H	C20H31N3O4	57.6	0	5.09	0.5168	4.638999999999999	0.6823	4.640538632247597	4.557756810148473	5.221389512624143	3.3615644344296656	5.193573080101652	4.926936914710334	5.9511512452851365	3.731340495622136	4.91059	5.1621601300855104	5.099721216951587	4.700041934575232	4.9734702363423375	5.0747187672953125	5.08370510632734	3.492049675475362	5.018836728763873	4.714039766915805	5.850812501392926	5.450255645357252	5.3951077338775395	5.233886784920339	5.82076149595601	5.1814811090863735	4.6900406117815185	4.36148403877361	3.515377662995355	4.724961261274997	5.488166201665423	4.458682053465494	3.4745305406533684
Perindoprilat	0.04144	0.2341	1.4385	1.238	0.8988	-0.1539	yes	down	321.181	5.9363	M-H2O-H	C17H28N2O5	0	56.4	4.477	0.5214	4.981	0.7986	4.569860652197732	4.756954908583548	4.493512132533346	6.071222893597143	4.6492424405046044	5.408877005620528	5.004706010586909	4.839187085176431	3.25439568772612	3.9185823129169126	3.9955402840775314	4.446377423226623	4.379022016049492	5.626544501454508	4.921509075058409	5.356576033153653	4.4708457313618695	4.353509400873058	4.140658383391304	4.272575671069873	5.8642077118569	4.3792461033673264	4.351550975928747	5.818718958745937	4.084309995921239	4.05805831545361	6.213953597259174	5.572732238356208	4.2446100252202585	5.668015877736004	4.629934580979241
Gly-Trp	0.02961	0.2061	1.4363	1.0269	1.0879	0.1216	yes	up	262.118	4.013	M+H	C13H15N3O3	67	0	4.862	0.3366	4.468999999999999	0.6225	4.547630779337603	4.318517033749568	4.4213632849171285	3.974224183878453	4.066528617775466	4.454776783439168	5.191556847853975	4.799188429510587	5.033707816246689	5.050800030244266	5.192321150793334	5.323433534917283	4.9523852223091565	5.00832368708073	4.615067458770894	4.206488169405495	5.033011725105586	5.185911005870465	4.726178303661111	5.0864831038114575	4.918323918915358	4.848741565909865	5.068150311799297	4.020644035848199	4.657050223622977	3.9530170304611776	4.315059211551212	4.436258834945738	5.057280372337448	3.3554315271679105	4.539248245135397
Val Ile Val	0.031030000000000002	0.2097	1.435	0.9691	1.0931	0.1284	yes	up	330.238	4.3876	M+H	C16H31N3O4	78	0	4.768	0.4132	4.362	0.585	4.217220615687956	4.289836406667922	4.671677751696678	2.8916072693794708	4.674530003970671	4.478756015243217	5.5377302270638165	4.454274576870546	4.7028543937155085	4.898086267519573	4.9072229881722444	4.164896255608096	4.866325862055765	4.91664417351602	4.181148732879786	3.7544955725035214	4.910749394472213	4.466425069456848	5.3102975663552785	5.343160937293192	4.7127885206528966	4.9694783374243015	5.3104324806614285	4.205614950968931	4.421669914604667	4.093065946431416	4.3265093461946496	3.5753971123842763	4.99153371014551	4.136884169124363	3.311515753384528
Nopalinic Acid	0.007286	0.1381	1.435	1.0126	0.9275	-0.1086	yes	down	297.086	4.3274	M+Cl	C10H18N2O6	0	52	4.696000000000001	0.2824	5.063	0.4286	4.712802250399822	4.898427186151781	4.912195287611107	4.560286232742106	4.3069044379412915	5.49487296384338	4.7811007322308345	5.324609218425064	4.641144716201588	4.823446294830148	4.755178084228347	4.211625270178013	5.009127839900713	4.7663077496749136	4.405227790099703	5.051068068898855	5.0232956012196395	4.4991011621294525	4.5400523258627965	4.7100500968812336	4.673589155396252	4.26884873685889	4.719382475942377	5.400387115637318	4.867286334049565	3.7700546310183833	5.2026924274644735	5.017980112108757	4.579193030609979	5.433959656190623	5.112465192735602
4-Ethoxy-N-(2-Oxo-2-Piperazin-1-Ylethyl)-N-Propan-2-Ylbenzenesulfonamide	0.04647	0.2448	1.4341	1.0504	0.8987	-0.1541	yes	down	370.183	3.7934	M+H	C17H27N3O4S	71.8	0	4.355	0.5733	4.846	0.7348	4.295707194632678	3.816329705393638	3.9073115626858	4.731867526499227	4.7113138607529725	6.049549417413501	4.199821000219351	4.8055822226381135	3.5706430254741184	4.40640730992079	4.322795535151333	3.907782018736608	3.2995578019840406	5.438170579815029	4.501943895884363	5.064134182093186	4.242043571541532	4.663200924985496	5.973676514223305	4.829446795028168	4.6725873422812185	4.4801136458126845	4.143730541508102	4.903181376712896	3.275261730654912	3.4602854250381636	5.234814550454633	5.1364205176247175	4.629903476922864	5.190931330958066	5.225381787311713
Histidylalanine	0.04163	0.2343	1.4340000000000002	1.0028	0.8827	-0.18	yes	down	261.074	4.0975	M+Cl	C9H14N4O3	0	41.2	3.214	0.5379	3.641	0.5521	2.9941527990856938	4.111768405104615	2.7867518374587634	4.543071675894916	3.511157742470628	3.9609730821125706	3.9607106441587723	3.848337502365328	2.6589767805860456	2.805979715621824	3.2169443089577263	3.2882446731338724	3.3852302944228443	3.657302209111217	2.204986052500203	4.5894438767201695	3.741646746571248	3.507299127602004	3.239722668364647	3.740184271641609	2.5781894323222043	2.9630800303245755	2.5172362601769693	4.168847309397808	3.666225756988207	2.9697885501676433	3.970002459089788	3.5573411168028666	2.4660276698256096	4.424555303453427	3.772081056555358
Leu Val	0.014280000000000001	0.1653	1.4336	0.9816	1.056	0.0786	yes	up	231.17	3.5476	M+H	C11H22N2O3	77.2	0	6.749	0.34299999999999997	6.391	0.4181	6.525604611878357	6.154379008180177	6.113154980616122	5.481040052697168	6.4075973648731575	6.496421158249158	6.9537046914097225	6.738093617413408	6.865601078642992	7.219643659030982	7.104469835518187	6.9485769090405824	6.845698754978832	6.73845611987329	6.3255696121630685	5.5906502924094275	6.888203190798483	6.5772620237192845	6.498795093602173	7.320254701952466	6.768941929583187	6.945799054976912	7.038629314809919	6.211254252832968	6.852995881599418	6.112576825081117	6.1039534763003624	5.859808183094847	6.854172682894223	6.100258554886619	6.0454470130296745
3-(4-Methylphenyl)-6-Phenyl-1H-Thieno[2,3-D]Pyrimidine-2,4-Dione	0.02477	0.1942	1.4334	0.998	0.9112	-0.1342	yes	down	333.071	3.221	M-H	C19H14N2O2S	48.1	0	4.32	0.4505	4.7410000000000005	0.5298	4.477970923992059	4.162730277533098	4.1815323083168	4.826417632086209	4.196370285109727	4.772919708927606	3.42333786141712	4.91037545870879	4.105771236695234	5.0366503175869815	4.5113972449469015	4.247904966002488	4.45175587510834	5.261683069274595	4.543641080000142	4.617726726006257	4.864278693421383	4.050817060656379	4.377846688521598	4.145137911516983	4.657118227842993	3.2260000103068864	4.504806113894718	4.980647707244294	4.514488031161396	2.799778481094696	4.917444409378431	5.213003802686564	3.9616033298863775	4.440427508183941	5.2394010121367405
Phenazopyridine	0.02804	0.2025	1.4333	0.9834	0.8782	-0.1873	yes	down	213.102	3.863	M+	C11H11N5	0	45	3	0.3899	3.4160000000000004	0.615	2.5057402749016795	3.0652523875821145	3.771951452682796	3.7613378975338168	3.3698304861734547	3.7254406436933816	2.61454364697247	3.3906801667150934	2.483307399517816	3.2911471631227407	2.6604102316380294	3.0672998515603656	3.0755960737050816	3.1643858323110283	3.317007218545029	4.477198898336324	3.0951621454436875	2.6757842198585604	2.6563709091761942	3.4451615798078565	2.47387122866722	2.7298816384216535	3.309162417605305	3.1707417157010003	4.351429770844457	3.695611599647424	3.606960020608684	3.139376691694552	2.6862866022120486	4.5969634756370965	2.975580918812049
N-Acetylmethionine Sulfoxide	0.02652	0.1985	1.4327	1.0523	0.8976	-0.1559	yes	down	208.064	1.0238	M+H	C7H13NO4S	0	46	3.786	0.6158	4.218	0.2077	3.80738984160514	5.112923880980954	4.208737266625612	4.328436464739726	4.574474168301365	4.4966932642895285	4.395570267320739	3.9409350102397753	2.5454333503442936	3.2577639882450486	3.883298867798772	4.0745563567950684	3.108933911943085	4.370437375443238	3.7956834031190265	4.506462087871643	3.8670328990493057	4.083169464152636	2.718559583497103	3.429828424558927	3.424548776266441	3.847423284431339	3.849649190605792	4.428992760545773	3.9753662818080198	4.120646760575816	4.067858776394593	3.9151117306951218	4.201800966347438	4.055121060988799	4.400088400846336
2-Hydroxy-Imipramine Glucuronide	0.03735	0.2238	1.4323	1.1329	0.9043	-0.1451	yes	down	453.199	3.8517	M-H2O-H	C25H32N2O7	0	58.6	4.5760000000000005	0.541	5.06	0.6895	4.0337117381826255	4.954284220574499	3.99698203939145	5.020913706640881	4.94781042328352	4.861875709889248	4.755568784437777	5.3273449035039375	3.815061299152057	4.336730879369668	4.215282509346071	3.6325374186360895	4.1711335970126315	5.235887611576137	5.106034398483021	5.321281681645737	5.094796781165437	5.252886398644382	3.8908760207662163	4.783493561996486	4.7569946524217785	5.190327538360446	4.677278966531115	5.7208361343261585	4.790901849573371	3.4572898229596363	6.548343197674098	4.4161847627676885	4.812163401860538	5.527452462256528	5.110810866277923
Leu Phe Glu	0.02273	0.1906	1.4274	0.9999	1.0824	0.1143	yes	up	408.212	4.1466	M+H	C20H29N3O6	79.8	0	4.963	0.3513	4.585	0.5253	4.498375275199342	4.49981018971995	4.323941469763072	3.438128411534873	4.7521388452806885	4.881815333308745	5.589162029577429	4.980245740486536	5.002549528971458	5.226755606252478	5.274642657927816	4.6973723226610336	4.882040585730776	4.8528070129894685	4.549502516890692	4.024308004460089	5.3202559974507	5.230481934842444	5.395233672522443	5.011125802423994	4.732869592029593	5.2262501312170135	5.098493461194863	4.617395453655829	4.854956942174911	4.288053492103154	4.568856364497051	3.801786442968293	5.268407796546189	4.224233267240875	3.8284114013695167
Hexuronic Acid	0.02839	0.2033	1.4255	1.1771	1.0655	0.0915	yes	up	193.035	0.6059	M-H	C6H10O7	94.8	0	6.853	0.4513	6.432	0.5593	7.212561229306175	6.13050168417464	6.640862336614287	5.802559390439898	5.720896983907094	5.6882309370680355	6.494295663440644	7.321112927030526	6.3761040900199975	6.904212883885664	6.955129548755982	6.742579595330232	7.026171447960596	6.056145042702902	7.127709036810174	5.509029682080469	7.021246151833088	7.151143404274618	6.68316030218232	6.644911229748115	7.487243574158372	7.386526822101128	7.177457995029348	6.667053440468111	6.312026814567012	6.368472351872258	5.755228686547191	7.365251705212759	6.092269081181513	6.056529232504007	6.441787487226112
Penicillic Acid	0.03107	0.2097	1.4218	1.2044	0.9277	-0.1082	yes	down	121.029	4.5357	M-H2O-H	C7H8O3	49.7	0	5.1080000000000005	0.4381	5.506	0.5308	4.803850223157367	6.052129749746609	5.3247637731547	6.441086347272957	6.126545434775971	5.202066890212418	4.910105057374185	5.246351539911411	4.555585214759409	4.692755227592556	4.728432903619695	4.87588095388108	5.1781033866315935	5.729882759553819	5.380214861303845	6.300841569113794	5.044989936239344	5.4059023480955	4.6077301479207735	5.351098401478943	5.092242941798616	4.719239524208415	4.964610016919738	6.209479813930862	5.208531085430224	5.519237433057485	5.520373067905939	5.486026523326049	4.470409074018979	6.283366179449687	5.561320789178561
1-(4-Trifluoromethylphenyl)Piperazine	0.006778	0.1356	1.421	1.0188	0.9362	-0.0952	yes	down	231.113	4.5589	M+H	C11H13F3N2	47.1	0	5.337999999999999	0.2769	5.702000000000001	0.4205	5.3636518020476815	5.433584868546263	5.675059384881733	5.5651491229836525	4.86332151789764	6.1609491630466025	5.410394574939457	5.770200020040437	5.309663760480973	5.5939943140778094	5.468978516542183	4.953353242240426	5.621130197214741	5.327521507736491	4.970408946405994	5.7462743458747365	5.733206360389272	5.204532453821394	5.22316876562145	5.362019202857027	5.191475351059645	4.910494765966593	5.364034265533159	5.493214547189461	5.547808375129869	4.652845962964586	5.845941400545927	5.629888146074808	5.384031532379353	6.219350316231072	5.617441159773676
Ile-Glu-Leu	0.03146	0.2112	1.4189	1.0624	1.0827	0.1147	yes	up	374.228	4.8207	M+H	C17H31N3O6	61.7	0	5.247999999999999	0.4138	4.8469999999999995	0.5754	4.258941777709664	4.620984992433729	5.196842956192572	3.8009935277794	5.0671893268514605	4.934054465230244	5.7435463579259824	5.2323182903990855	5.6039467434901695	5.428409732859159	5.725440913758386	5.2434785282637995	5.132493229756858	5.184123267301963	4.730679514453543	4.119039969285452	5.352884259660608	5.655264860056813	5.685490321925499	5.458607098316713	4.719423163791563	5.480885715606743	5.374316466962439	4.92359329716224	5.282045672474747	4.4822063471998	4.499559333145156	4.275112428506636	5.7689384336136245	3.924530692085638	4.9299717146221065
Gln-Val-Ala	0.02502	0.1946	1.4174	1.0129	1.0824	0.1142	yes	up	317.181	1.8026	M+H	C13H24N4O5	39.1	0	5.006	0.335	4.625	0.5653	4.49474975818184	4.5214132597827765	4.806874295263022	3.298656067599116	4.8510638487726885	4.601972551060852	5.627692331578629	4.6268355990024	5.169196856801286	5.310118613320019	5.280479191899627	4.767644169499012	4.942448302492255	4.937585763647756	4.457397723218098	4.215471201415604	5.239786551864251	5.066394579241735	5.3572753380493365	5.258259684523325	4.8625439277863025	5.245582370874437	5.229436813422405	4.503684388753406	4.735025790978658	4.557348134293624	4.731830401023033	4.431205119386424	5.350684176239887	3.739425873493116	3.859584496551357
Gly-Val-Pro	0.02597	0.1975	1.4163	1.0398	1.0808	0.1121	yes	up	272.16	3.3983	M+H	C12H21N3O4	64.1	0	4.907	0.1881	4.54	0.6455	4.661045214958602	4.799887540247334	4.785577432650593	4.919918006208092	4.796868131974885	4.969104191423224	4.970985654344925	5.277982920776799	4.798423360426545	4.953852193606672	4.863325767591163	5.08170489460704	5.054642157335562	5.168282010211958	4.626700973924189	4.7968694915070245	5.032244373420084	5.0651158757712365	4.510045752098928	5.120897164210438	4.9677977339685055	4.936580499523532	4.934829082843403	3.5270881181118137	4.923006347909501	2.5611895181588777	5.379233910254413	4.520842106853404	4.714231074266571	4.25339058351864	4.013156654608972
N6-Carbamoyl-L-Threonyladenosine	0.037880000000000004	0.2257	1.415	1.327	1.1264	0.1717	yes	up	413.141	3.7827	M+H	C15H20N6O8	86.7	0	4.171	0.6259	3.7030000000000003	0.5087	3.5691165834267533	4.431580322648523	3.1517351009505603	3.0015131482129824	4.510480528966553	3.584946360705136	4.355760243230514	3.3151119398961795	4.2099970838239065	4.152266606485616	5.6890720800237355	5.011735020084736	4.11917113217389	4.196259204971427	4.200458525143132	3.457117929587584	4.031878594184558	4.838550826066947	3.558491361009378	4.5577651675629856	4.258275317149507	3.3833927356254647	3.913039656276441	3.8611354786326135	4.212526756784094	3.604240372997968	3.3757144512527137	2.982736500748184	3.1709972757614167	3.503018996432502	3.7999441791881474
Met-Gly	0.03818	0.2261	1.4123	0.9841	1.1027	0.1411	yes	up	205.065	1.6914	M-H	C7H14N2O3S	67.8	0	4.293	0.4454	3.8930000000000002	0.5757	4.047865116171576	3.687964563836757	3.1994043104741263	3.5664761923218937	4.178835391131356	4.253776166239549	4.945687771477107	4.1024060231331445	4.228481512878251	4.762105501720275	4.467561423279922	4.290321974996602	4.098883402737602	3.9470243355981647	3.604781280859549	3.595164659258616	4.552663470760617	4.524058814381212	4.712126407805134	4.670135291333325	4.193118062674095	4.590710318115441	4.70611301025156	3.4297192810399126	3.9260545312564186	3.0323207007848967	3.6124329939321447	3.4606966546654423	4.593919090650373	3.57864526850148	4.005720145153772
Valnemulin	0.017730000000000003	0.1764	1.4105	1.1313	0.9312	-0.1029	yes	down	563.358	6.213	M-H	C31H52N2O5S	0	42.5	5.507000000000001	0.4109	5.914	0.48	5.6100678268507895	5.854766124267816	5.191637461729757	6.3814986954950745	5.8137491919643445	6.271990175435128	4.89376777508342	5.663486994588737	5.029290266765573	5.793760551897348	5.208765760380096	5.129493891314357	5.177421798575113	5.944924369701233	5.849432340904138	6.320348720025394	5.967631439126152	5.749873932760089	5.617529269237908	5.996461174339241	5.85976519020504	4.571151322396436	5.65732586977242	6.026115971078994	5.595224029376905	5.49522015989564	6.5352887481737305	6.110744773194583	5.543447805964142	6.698273971180582	5.957821412505322
Coriolic Acid	0.01697	0.174	1.4098	1.4654	1.0814	0.1128	yes	up	295.228	6.3036	M-H	C18H32O3	69.9	0	5.689	0.4591	5.261	0.4562	5.875105992584152	6.162515199488647	6.381971346398964	5.963248107263897	5.722111637075133	5.707446758553956	5.614134996698126	5.400625686642625	4.810477602813549	6.594833824108927	5.6947348317550635	5.432130984258177	5.7256224930029775	5.391091911186881	4.849628090062604	5.737333937303473	5.9072125760830225	5.0854793454512714	5.7960761258720845	5.892747436335509	5.901894063398683	5.823588463037576	5.419054279792608	5.47056281277808	5.188936503003586	5.221923042806627	5.306928993086904	5.65542952759467	4.7424469319244595	5.0859490141608	5.141042257655147
7-O-Succinyl Macrolactin A	0.04303	0.2373	1.4089	1.1016	0.9068	-0.1411	yes	down	503.261	5.9714	M+H	C28H38O8	0	67.1	5.0889999999999995	0.534	5.612	0.8456	5.452427493941907	4.74521872911494	5.052231224963314	6.049571808752531	4.759070939113837	6.0099368259624075	4.7773129161592784	5.479721108012786	3.673234849085458	5.571520708887512	5.16889759613467	4.992922549847641	4.49280023685034	5.8452889061762985	5.94015132456394	5.9483402433386425	5.7345207088456585	5.584202031032206	5.18444076211784	5.485287044876967	5.187443412410427	4.533318236323522	4.8791984208209245	4.875250016096549	4.99108256298675	5.297891806901233	6.342617104271238	5.574097493019298	5.5921099608405855	6.392350552967103	5.336417566498806
3,4,5-Trimethoxycinnamic Acid	0.02852	0.2038	1.4083	1.0735	0.8758	-0.1913	yes	down	237.077	4.3647	M-H	C12H14O5	72.8	0	3.167	0.4227	3.616	0.6656	3.5307211501535987	3.178202760857352	3.6041561378613873	3.7036695397162833	2.2666133855517194	3.8274285635767566	3.6385969801653903	3.211390815466844	2.3222635887520315	3.3303676661875183	3.3650686890411987	3.532832590796384	2.7160774117653017	3.4702814078197366	3.028910449976326	3.712217890316927	3.6860731841987615	2.8967598188322348	2.8928034248728225	3.4310410706321384	3.1241410969988177	2.8696973320764947	3.54616320438634	3.4864106370709	2.610339774125254	4.660787560335916	3.9056604296379467	3.332502987106402	3.1813279374544803	3.9138185606136937	3.43753411355182
7-Hydroxy-5-Methoxy-4-Methyl-3-(4-Methylpiperazin-1-Yl)-2H-Chromen-2-One	0.03463	0.2187	1.4067	1.088	0.8939	-0.1618	yes	down	303.136	4.1778	M-H	C16H20N2O4	0	57.1	3.843	0.5966	4.2989999999999995	0.4879	2.454685658049684	4.6751933702828214	4.442346608863839	4.378585156543532	3.713851072864327	4.403687351259675	3.978353144579021	4.0542222935282615	3.2012486053372107	2.5588242719768672	3.9068006785085045	3.7286741842066564	3.935610502852497	4.146292889268636	4.582231412070684	4.533804194934564	3.5768957624181863	3.8829516173674814	4.2271333908965225	4.1319346404011865	4.3367531813976345	3.526293762473752	4.1007491433632985	4.19979223026171	4.388154610829928	3.4240017421022864	4.880583001801312	4.54628231014928	3.9439961391616833	4.718612779090236	4.529543167680592
Asp-Val-Pro	0.04746	0.2463	1.4046	1.1866	1.0942	0.1298	yes	up	330.166	2.9596	M+H	C14H23N3O6	49.8	0	4.927	0.3696	4.503	0.7681	4.725853457611793	5.483830350877991	4.42313	5.050507377400695	5.741446214899641	4.505802584757749	4.946554543211967	4.910801178601205	4.89364640032202	4.912302220123113	4.920912502946817	5.166173297489774	4.996227699243514	4.877134555550488	5.169551538958946	4.911323702056691	4.9182207259947806	5.1283739569610605	4.178789885147843	5.261101871720925	4.741056901595584	4.4140846544400745	4.685114449379687	3.6853693171466304	5.250107956534448	2.501819075765364	4.921915888308188	4.545674027296176	4.713293036494815	4.502974351566075	4.036765475029966
9-Oxo-Nonanoic Acid	0.01115	0.1553	1.4024	1.053	0.9195	-0.1211	yes	down	217.108	4.7601	M+FA-H	C9H16O3	0	68.5	4.41	0.3626	4.796	0.4222	4.404960303893322	4.637374741856194	4.6202888202046175	4.704573204643316	4.23155802107072	5.0956278108223865	4.02575179385459	4.573134790295084	3.607985124296248	4.304559275799972	4.351013651116837	4.291570302318603	4.120897676867643	4.640354331097672	5.203509819018568	4.6997821522029515	4.088425452983467	4.501098974288642	4.5406218379659675	4.713098309466262	4.544706484858232	4.055066318646783	4.970829535623974	4.631738051364652	4.268202841973602	3.600263216717919	5.4295800830696725	4.856980748468559	4.196400764914754	5.339169105236752	5.087407680148154
Gln-Val-His	0.003996	0.1179	1.4024	1.0242	0.9413	-0.0873	yes	down	381.192	6.0107	M-H	C16H26N6O5	40.3	0	5.659	0.2416	6.0120000000000005	0.3895	5.818237161896048	5.8827373469246975	5.656631964681719	6.043693202733738	5.806155160330628	6.464951078373562	5.431608926776197	5.732411854692455	4.997231276943992	5.685769535376087	5.751812958346172	5.246357765823109	5.342154945926604	5.865468329913608	5.856771787627138	6.083460706210711	5.8232094596882265	5.965790355497142	5.7248748500001385	5.740352812408505	5.7447510452261605	5.643943673898523	5.673233051779058	6.335204052665636	5.290962800355074	5.511939286391717	6.539489293133175	5.9796895023019205	5.999467858756506	6.347208104745391	6.226390192260612
[truncated: 227 more rows]
[truncated: 9 more columns]
