# Supplementary material
Source: Research Square preprint supplement (doi:10.21203/rs.3.rs-8785596/v1)
Supplement: Supplementary file 4 [file be615508cbd7a9fec25cf32f.xlsx]

## Sheet: overview_download_express
ID	Metabolite	metab_id	Retention time	通路	M/Z	Infertile_1	Infertile_2	Infertile_3	Infertile_4	Infertile_5	Infertile_6	Infertile_7	Infertile_8	Infertile_9	Infertile_10	Infertile_11	Infertile_12	Infertile_13	Infertile_14	Infertile_15	Infertile_16	Infertile_17	Infertile_18	Infertile_19	Infertile_20	Infertile_21	Infertile_22	Infertile_23	Fertile_1	Fertile_2	Fertile_3	Fertile_4	Fertile_5	Fertile_6	Fertile_7	Fertile_8	Fertile_9	Fertile_10	Fertile_11	Fertile_12	Fertile_13	QC01	QC02	QC03	QC04
pos_36	9-Octadecynoic Acid	metab_35	0.32055	-	263.237	5.481759779858005	5.7569134801828366	5.399195207181744	5.86450354003483	5.788722212735762	5.44803145720054	5.481728720640583	5.319387457448542	5.402171197214916	5.35436315075876	5.830056323534143	5.513475873012724	5.542353700346391	5.499346786915374	5.510843464587573	5.318035733195092	5.464998826965966	5.338893028938758	5.411217480295199	5.4458491246372285	5.489480114463278	5.640186014953841	5.778592243571134	5.494641392898886	5.362032955951185	5.443197362085222	5.157177384052054	5.592109855642626	5.4945778611595335	5.387956238988478	5.249975486244198	5.377889824280291	5.451439283202739	5.559261758274534	5.414119004279816	5.456802724711877	5.142182848907826	5.3301123267565975	5.260108966817078	5.188819781818184
pos_69	Spermine	metab_68	0.47045	代谢途径;谷胱甘肽代谢;泛酸和CoA生物合成;辅助因子的生物合成;胆汁分泌;精氨酸和脯氨酸代谢;β-丙氨酸代谢	203.22254985599997	2.405223563593816	2.824152083255912	4.145019470296903	2.3420924819055067	3.85115698069049	2.028713739773462	1.965727855424982	2.013926735325374	5.4859187871062565	3.0582386071732537	3.200148243296756	4.369586932589995	1.8464103140670167	1.9610884881048167	3.531791292588536	4.801671110583528	3.143991149106049	2.026487656955306	2.9107078375839315	3.5831192071291107	1.8264507247069184	1.9071374328090802	1.9937723497894468	3.5145414506450776	4.460006563544117	4.500479409896013	2.0213069809303543	2.3121580077841486	2.943333357185064	1.9912904134202751	3.0654311936665914	3.5627030743292654	3.276581959998431	2.761752447773401	1.9211990452353287	3.0462196821742915	3.4833527666242285	3.5113884719479214	3.6034228896274616	3.565562849556468
pos_78	Isoflurophate	metab_77	0.47578333333300005	-	149.054	4.8864028471302525	4.424945912280887	4.919956578405716	4.173678870833451	3.8381023706611477	4.884926455193089	4.702458961703465	4.790232015503572	3.9045209125246334	5.103065777600798	4.477095047981403	4.636004966817264	4.611378783063596	4.7093347155342995	4.483693108458829	4.1969440902584765	4.602903587993676	4.660826446859218	4.646570475788813	4.682724103613798	4.667022863096742	4.587945246407472	4.766850457462263	4.951611947016849	4.107491999182087	3.3806186327986163	4.526307621229592	4.890824302146551	4.649593690770518	4.82456656821442	4.755552731076465	4.7148353996416335	4.7927163707267635	4.185372712564405	4.664017887202369	4.08345213144844	4.786892725510245	4.724105245671947	4.641423191647874	4.7331305716711345
pos_92	3-Methoxypropylamine	metab_91	0.481117	-	72.0806	5.399425475866966	4.747560096763533	6.1119158822595905	5.050741545675624	5.322594730521675	5.163379818966476	5.51292899977233	5.901809917704997	5.584016032863354	5.9214763612060635	5.781338346908933	5.771649333657247	5.3864752417462025	5.168249675427061	5.9466518500457735	5.851211405930497	5.453508453098077	5.764910849168223	5.70865130784727	6.291265765788897	5.051145490431745	5.442296356177945	5.466790314165585	5.633331410796307	6.21197213164485	5.770340513384278	4.752706854698519	5.070817262609091	5.106757187977808	4.978646838993812	4.926747971696031	6.216110194050428	5.516060330370327	5.3582510584567435	5.3652273230844125	5.605026446916137	5.790693402978356	5.763617311598388	5.759399494314136	5.7619597842838015
pos_108	2-Amino-3-Methyl-1-Butanol	metab_107	0.486467	-	86.0963	5.9994771682313885	6.1999084625615275	6.1793373536523974	5.1544545303662215	5.1590185591006525	5.4979829943824665	6.008250114719791	6.243135762569794	6.512647618037964	5.943046257229631	6.467172745896013	6.349507576174786	4.732728465762412	6.020922622304058	6.194059459230981	6.3360245687713945	6.111713946527277	5.453141850204562	5.996800120516763	6.556961192729408	5.536169537994367	5.6008251241107905	5.088522584294059	5.433155063159823	6.658052475133506	6.305462680651988	6.179209425209409	6.571511355393892	4.794266139945602	6.262018051092968	6.375617193670582	6.571317941050601	6.3448169479275975	5.141635098645507	4.9295128593101785	4.892230704584367	6.21176012771824	6.1670962923215535	6.167758773675757	6.176815905643108
pos_111	Cyclopentanone	metab_110	0.486467	-	102.091	3.6527234086687885	5.1652741890272615	5.865514616023897	4.18774628619438	4.601660099877856	3.5032164910644443	3.764940633381377	6.125566898258114	3.6559118360786007	4.490980322940805	4.9274703746068385	5.0219579853719605	3.7774564453000163	4.658310498928438	4.90460921581322	4.147052043336428	5.6011478669329415	3.4175840121287933	3.5547171947854577	5.669865839731807	4.8647681052030585	3.9401217608916097	3.4324489518301915	3.757810619948384	5.350543264028314	4.202449110857413	3.518939070700692	5.065979450992681	3.527963146908579	3.68719504144216	5.379921983880222	5.326383345045383	4.446666262897661	3.8255067976681247	3.6702774161843457	4.902311910042681	5.246184924744738	5.187396819820216	5.180988445973481	5.185649393589947
pos_118	Lys-Gly	metab_117	0.4918	-	204.13394238400002	4.690321987990092	3.65340790613764	3.0040701148131297	3.8735604199180136	4.721515546031326	4.516927331219917	5.269232333233786	4.521648179120086	5.334486081790881	4.845613761512873	4.95539343073133	4.985456954551261	4.9023812257547625	4.568840341555247	4.00118567661094	3.8512503074701607	5.118607922062923	5.092077193784171	4.9074219329477735	4.964710670372706	4.55155168735108	5.0359380634154345	4.919837742478454	3.630887688230632	4.672917195225856	3.930808943043601	3.0467887869105104	2.8743137437199326	5.202568096590745	3.0165015603142216	3.9740032736694975	5.291595644117618	4.83862135061915	4.025467128822385	5.118168433106527	3.379124576582824	4.894501516622993	4.810678774330714	4.773240915175793	4.795514945488294
pos_127	Lys Ser	metab_126	0.49591666666699996	-	234.145	3.2871323170580617	3.378994053492623	3.156874456655668	3.045852108102782	4.4300977679245825	3.2070777624352407	5.1037493964550364	3.1921580398729086	4.912465766084655	4.292287192563757	4.721365313538711	4.1803464038912885	4.538045786814785	4.226724612076814	3.5375292035008497	3.176284930446075	4.686945849043932	4.6003659666605285	4.866730490456686	4.994027299365172	4.153159374739517	4.842264658102184	4.852775829323675	3.1317716706157723	3.4851007112344927	3.8982012954908094	3.1996050954662683	3.0270736029135654	5.2071085580469285	3.1693095068334927	3.1587719527034106	5.153451019081345	4.205586476056377	3.526550248548516	4.577034547798792	3.6591318930237917	4.291584169723748	4.426533525931927	4.439766621213084	4.510961951137422
pos_139	Temazepam	metab_138	0.50125	-	301.073	4.601253176499529	5.099903963560412	4.650994652146666	4.83270947916763	4.9165241404642845	5.433372215062368	4.809004692905158	3.533038098005365	3.9453452860248017	4.710496740716309	3.530313804943152	4.778757634595531	4.8544753945250845	5.242648534185932	5.115909820171133	4.978793115528124	4.028895524804128	5.266333255946224	4.949325714086241	3.9024880023593833	4.70739926166577	3.4250992002063363	4.577186841259839	5.4035500740200435	3.5171937445277	4.457796031471679	5.035389207122138	4.7886384659694405	5.134956608103802	5.323562709671196	4.6814749128173325	5.177014206164115	5.038812890251745	4.876859383308894	5.159919062357504	4.771840342599613	5.196552133056966	5.073052960530585	5.127013281688382	5.0786621703378865
pos_144	Histamine	metab_143	0.506517	代谢途径;气喘;Fc-ε-RI信号通路;次级代谢产物的生物合成;TRP通道的炎症介质调节;组氨酸代谢;胃酸分泌;蛋白质的消化和吸收;组胺H2/H3受体激动-拮抗药;神经活性配体-受体相互作用;组氨酸和嘌呤生物碱的生物合成;突触小泡循环	112.08670915299999	4.8019379264089865	5.317895964547584	6.212913177326832	4.013904018273846	4.282661174992493	4.503721036953623	3.935034056744022	6.066093122762543	4.905296146165903	4.384232848818268	6.2758332554417935	6.333737945549455	4.781899887974278	3.8984979165505202	4.692661177402303	5.57527153852849	4.895190747422961	4.619259391738669	5.364833146458827	6.550799743830372	3.542365273011663	4.2796487598300015	4.4797168600787485	4.687530858707031	4.5608656011851165	3.9160628918486635	4.324833803169989	3.566919650496025	4.828129110840372	6.392815536537875	4.804052935534172	6.53590327481686	5.726063690754173	4.207817364533509	3.988481738511005	4.854899764255781	5.892994491793159	5.864591626615013	5.859787022413741	5.851550955041312
pos_152	(S)-2-Propylpiperidine	metab_151	0.511867	萜类和聚酮类生物碱的生物合成;植物次生代谢产物的生物合成	145.17	4.8387371788208355	4.966243682966775	6.7330014193079295	5.001945111130394	4.4955053369247775	5.752281003362075	4.892978421191452	5.244645237105932	3.2056673495775585	5.867993250029597	6.244897040550576	3.886383726408214	3.2164478938445726	5.1286390173615946	5.676545218088298	4.790031532688986	5.4203970433617705	5.591854079296407	4.559728849618144	4.998610709557312	4.46997343491532	6.041556730906468	5.089859259005491	4.973150446145345	5.702291982317619	4.954738787410495	5.357882644767312	5.901517673541213	3.4090796231445717	6.183807427638597	5.3774586955237185	6.352560513380951	4.8099084025026695	4.371620907780582	3.2921858999834326	4.649129130920795	5.815092683255483	5.795856154673968	5.784986560411768	5.826662126989256
pos_160	N-[[(2R,3S,4R)-3-Hydroxy-4-(Oxan-4-Ylamino)Oxolan-2-Yl]Methyl]Acetamide	metab_159	0.511867	-	276.191	4.0894971159391815	4.0551341978307365	4.7741327202934665	4.4798129081791815	3.86004838467894	3.337176369334436	4.231585380232026	5.6299248170746425	3.097158166466775	3.2962279803387755	3.284593279567129	4.183946246455228	4.298412272845203	4.4616408485773915	4.790628473042083	3.6125034304741015	4.97601	4.920380282854834	3.27057764256877	3.750513564959898	5.253134484393626	4.864115516866467	4.86202402397201	5.12815775563522	4.48007875260046	3.0077979351387762	5.353882479151394	5.8250827365221705	3.990565536990348	4.420834656829498	4.727849554376586	3.950523056430663	5.232312524790943	4.401928176811519	3.1836628415258725	4.343279458255906	4.785709953473726	4.7995910424744785	4.817025732591294	4.823759025183437
pos_353	N1-Acetylspermidine	metab_352	0.5330833333330001	-	188.175	6.2842644364182885	5.888641368981128	6.30289535716453	5.775124264289143	6.075825807538241	6.4571060818576935	6.953900903536764	6.595017777877697	5.970103269480416	6.442943681322294	5.7835770208733726	5.549586477890463	6.131952054246009	6.569488284048479	5.919274166306401	6.354181721219156	6.575893643154725	6.069522772310686	6.440796586600458	6.242906106689844	6.435195585900825	6.320974005120359	6.673793940394822	6.133153454805969	6.22368071755127	5.645013588662168	5.849564726584246	6.250066121460856	6.372453245375175	6.126215271239734	6.2332539113012775	6.379100652440353	6.513829467575145	5.759607628994901	6.392290355280845	5.64422544067776	6.278570963406187	6.276063062165813	6.282659345501982	6.285472359001702
pos_361	Gln-Lys	metab_360	0.5330833333330001	-	275.171	3.2355965092484684	5.066072513656319	3.2569699592186865	3.166004509259634	3.9160226250541808	4.160831755548312	5.039041131331934	4.560947831983412	4.544962408201514	4.531641982635397	4.468375828461162	4.023157465902443	4.3619649693107005	4.481617750018874	3.3020128419212202	3.018619094870417	4.756214937759936	4.370686135739672	4.683959114885538	5.0524674173018935	3.5221277437460885	4.5829953380142285	4.577487134351256	4.185288435813888	3.931457706144759	1.4172771514139353	1.6865651308006484	5.919415287548713	4.7892515828726365	3.9316069887204783	3.953323281377942	5.046657270974655	4.540404875001581	3.2759109545996785	4.521201930309697	3.1970412046499868	4.622113507998662	4.433400669830165	4.4521699492299165	4.3928004353458165
pos_382	1-Methyl-2-Pyrrolidinone	metab_381	0.53845	-	117.102	4.578628158306798	3.9702356696629857	4.596851807794357	3.9445004007592517	5.578558960995926	4.802986907087841	5.31338664560954	4.9635735569201485	4.282334429330969	4.757246515980945	3.970220031807555	3.689130231766708	4.353308618818104	4.918277273893438	4.173518665674712	4.627269791358717	4.942699006144753	4.3119733411891055	4.770079734547479	4.563501771123779	4.752513399912172	4.6711314160721935	5.006253001670238	4.356840970166764	4.554848447388472	3.696827243373043	4.032865668228055	4.574978805123108	4.722538013837903	4.416346440085875	4.5429091610380254	4.676983948355511	4.8261401972437135	3.929298186054632	4.684588609258324	3.9310100587422014	4.629228112795476	4.6314556097986594	4.683151295938546	4.650209462368541
pos_425	(E)-2-Methyl-2-Buten-1-Ol O-Beta-D-Glucopyranoside	metab_424	0.543783	-	266.159	4.166728148785502	1.6386079525566348	1.7047910618791862	3.3734445710064356	3.647075681473189	1.7540902536910647	1.6916688925095298	1.7394285862583367	5.297040036831197	3.6921567367329318	4.8895067033117074	5.690528010120474	4.5775444512234165	3.6717016577178105	3.727404421070577	3.5851386626640664	4.502972098039217	4.630561984405169	5.106529685394149	3.9866081548669134	4.242984322844384	4.57121327730203	4.435077887848509	3.2373986217548376	3.4850230190134863	3.746118838158428	3.808591017041096	3.95624725308843	4.3322684212287745	4.17323041614918	1.7066524876671754	3.335157466776498	4.237139971818962	4.506319471553857	3.880427570335593	3.2849199836124865	4.566843743748999	4.635334845631244	4.55840756425427	4.5440447642563395
pos_486	Glyoxylic Acid	metab_485	0.559767	代谢途径;乙醛酸和二羧酸代谢;原核生物中的碳固定途径;嘌呤代谢;不同环境中的微生物代谢;咖啡因代谢;氯代烷烃和氯代烯烃降解;精氨酸和脯氨酸代谢;甲烷代谢;次级代谢产物的生物合成;甘氨酸、丝氨酸和苏氨酸代谢;碳代谢;C5-二元酸分支代谢	116.034	4.315984846407412	4.795060099603703	4.107331834571752	4.3328245804152035	4.922587886279705	3.99255244784662	4.235418093421216	4.631620951699409	4.0808388518136445	4.615290815127199	4.253665472114654	5.000395660964489	4.6364703980938335	4.3787145133869405	4.816645170560639	3.9831078357414818	4.441326280890864	4.6647305814734175	4.101741755655936	4.689885907174463	4.213431569885968	4.672272369111981	4.4277249937022365	4.855504555602057	4.705949195422418	4.797338167138367	3.8925394715419137	4.319072526728636	4.314040079022499	4.289245709358308	4.258324692774362	4.6398438015371415	4.433783526753993	4.110551630457631	4.4685865118631325	5.081308178966811	4.470936985586633	4.5825912625547085	4.546540351413307	4.488865387522228
pos_488	Diglykokoll	metab_487	0.559767	-	134.045	5.355677863636322	5.721369818251713	5.083825150074525	5.352174750041746	5.889941629313553	5.097789880257207	5.351659532317503	5.615884204066961	5.1603853145482175	5.546915916137018	5.266360072967434	6.0059107640713885	5.647875058407958	5.327816296632298	5.843600246301769	5.024838752254193	5.4919004230956245	5.653667327053514	5.224049086747121	5.677300341850116	5.320478864356481	5.7011483089206365	5.4297363875262095	5.752639069985384	5.653524177489822	5.766909852068506	4.888331874978754	5.335379732958769	5.330415718675363	5.279085075718911	5.254591784115188	5.65200204776164	5.512848029569828	5.2582062624569605	5.414418715417246	5.980433634127055	5.514350573610106	5.51863549194673	5.510276853205547	5.490002098552252
pos_511	Sarcosine	metab_510	0.565083	代谢途径;精氨酸和脯氨酸代谢;甘氨酸、丝氨酸和苏氨酸代谢	90.05477920790001	5.613026314437408	6.0650769859861455	5.575111864466826	6.11153605844395	6.167180389805067	5.921390796262237	5.772488466509856	5.8118595450122585	6.0306227736075	5.809951262826796	5.956945841133738	5.882928834452318	5.738310859795959	6.052541236068042	5.958939576474041	6.299097846682125	5.815814947896378	5.945216785592357	5.968656934179777	5.8610347123859095	5.759305640170027	5.8097968213820375	5.787649335486442	6.119078666609252	5.871725809061263	5.96152411979062	5.895190118674128	5.807375353763912	5.827166448244571	6.1557480088851975	5.6954834108377455	6.016456280261973	5.932711563257768	6.14555720757195	5.868503110632233	5.92818449160375	5.938054786212226	5.9491048058819445	5.952426944138553	5.9373549158560825
pos_547	Dimethylformamide	metab_546	0.570367	-	74.05990937760001	4.790568887815216	5.17514163776682	4.653935072746799	4.491276522222367	5.07650104427497	4.875850616345316	4.778131247073189	4.705920863710723	5.201383398098606	4.8022515754431305	4.540153873470417	5.046531537122359	4.943750854704512	4.892976494043327	5.006196883747222	4.530595937562424	4.843568663939129	4.803069802008225	4.630953051668183	4.783475739434682	4.787253056219819	4.353420625746274	4.776250157470191	4.869427812641822	5.0057484438530135	4.820465447826575	4.562853911183732	4.83691158323114	5.032489831054232	4.483324175555097	4.881177894632718	5.087695269737604	5.0380113606802	4.615211649437929	5.000194393032708	5.0354320658412695	4.788226307136709	4.900954927645053	4.895160485726314	4.841794392748509
pos_550	4-Hydroxyproline	metab_549	0.570367	代谢途径;D-氨基酸代谢;精氨酸和脯氨酸代谢;ABC转运器	132.065	4.461709469508348	4.742820644601701	5.330262767146935	4.095166011672036	4.484407088563806	4.328818044464946	4.303238842979243	6.277127729797566	4.476889453164584	4.944032326909868	5.446304761409763	5.410598099024812	4.6173130840589485	5.409756120527074	4.737038122236914	4.032821284795257	5.182298338581623	4.676592851568762	5.224754477840719	5.1226279358929965	4.65183938360231	6.050115223013912	5.0430162965707	4.689565203979785	4.849755251953604	4.408558072867799	4.066672357433388	5.144323811287144	4.456040883414743	4.750615807184023	4.463100349327863	4.456811243908341	4.533074066248736	4.3636055908162925	4.762505550086737	4.9221485671145375	5.1691641359404334	5.219766028234201	5.20313419649575	5.163518023290347
pos_557	Phosphoserine	metab_556	0.570367	代谢途径;各种其他次生代谢产物的生物合成;甘氨酸、丝氨酸和苏氨酸代谢;不同环境中的微生物代谢;半胱氨酸和蛋氨酸代谢;碳代谢;各种抗生素的生物合成;氨基酸生物合成;甲烷代谢;次级代谢产物的生物合成;氨酰基tRNA生物合成	186.016	4.5828282676436665	5.263126764108657	4.7363323333933565	5.482392701099682	5.396936709785607	5.483242351005449	3.2570170276177284	4.677531281611724	3.7465147410578417	4.017837061060044	4.704773382208468	4.371137613839413	4.3400799011306885	5.2928693666578575	4.885372433392654	5.511703804861256	4.5943792629111435	4.249333339791534	4.709328664427503	4.6143511400651285	4.128602390844868	3.966989467344659	4.28661603482646	5.1045791714959385	4.75460616170559	4.881295667961755	5.1272249186036225	4.681414725758168	3.897215503874368	5.285271027983075	4.903569732123179	4.969492191290381	5.046828741132352	5.318739233787798	4.295417373118071	4.974998992912892	4.823816822537231	4.814027634742727	4.886717805523934	4.770392480395583
pos_562	6-Bromoquinolin-2(1H)-One	metab_561	0.570367	-	223.972	4.538215378748392	5.692434553281788	5.1710384223548616	5.62259100157512	6.076446312857702	5.792529913255981	3.3787634492847425	4.727500185265035	4.894294668962296	4.248051567436017	4.9528052856493305	4.104497413583035	4.186184690751758	5.756431437087366	5.3526638432090206	5.81246835783018	4.5569268805222665	4.134756616839153	4.964074205419556	5.061397183834033	3.7688802802431534	3.445293084068458	4.1293518175721475	5.751858060130194	4.412828774431637	5.313403217118578	5.723659960675226	4.602589936965853	4.137590270802177	6.0101044357416615	5.5162437944173455	5.312416090932474	5.1339657404862145	5.8974353683982494	3.984892842251901	5.660550233251977	5.113214705636404	5.117184217989345	5.107594138948183	5.093452486841949
pos_568	Porphobilinogen	metab_567	0.570367	代谢途径;次级代谢产物的生物合成;卟啉与叶绿素代谢;不同环境中的微生物代谢;辅助因子的生物合成	259.129	4.631360819046893	5.653903698102193	5.367129121500068	4.941259118123365	3.3548240809021688	5.562287996721664	4.317550795905047	5.012415486219377	3.8313201384755953	4.2445770726783465	4.666942875389273	4.849230431773939	4.668301688190409	5.314074848351434	4.362560141450616	5.152478012528607	5.096921787215545	3.4236270255878103	3.7262014716274847	4.218032370707038	4.050986242249919	3.51092736120836	4.820188980595472	4.930002835900337	4.418700931994171	3.1413482234318346	4.770826428706373	5.721530982148518	4.865062663565492	5.482053802313894	4.88528033710272	4.750351683592175	3.6024904090256618	5.003694773792718	3.317250766838141	5.434881527391903	4.9462117065968565	4.973629815155461	4.973586845114681	4.923887288140596
pos_588	Oxazine	metab_587	0.575633	-	84.0442	5.302662778338571	5.716267540410085	5.352763206151787	5.516880323647996	5.783140149702791	5.70646424824198	5.1829712872742215	5.222514999027709	5.671242207037164	5.0636532470760764	5.258650555144811	5.586079635825758	5.416638086578338	5.715684636106446	5.478704230384556	5.6930350127363925	5.3367774869428	5.2948827685968896	5.323568042845023	5.2486879709410195	5.39068660782379	5.0220082841252776	5.244962763840023	5.689836609197072	5.450891397610135	5.386341775851778	5.513003056683623	5.431624434401691	5.262422689035094	5.657357025565095	5.425753764387583	5.515875670017148	5.608437658038834	5.6033470685076585	5.359348138665141	5.546631650967103	5.4739238018374285	5.481104068172547	5.5021543853952535	5.459230870340699
pos_589	Crotonic Acid	metab_588	0.575633	-	87.0439	5.024881998029462	4.550581783519653	4.794393607375952	4.193829148735499	4.136817959061976	4.700828229887385	5.819522461548807	4.560427941736315	4.847444002947227	5.234494213060482	5.974013111924605	4.705476166162124	4.723368299012135	4.790129073458559	4.486614618966747	4.728610537203288	4.693626896516174	3.9241621675247993	6.1098342663328875	5.300784574657566	4.720232005066976	4.616256447094195	5.181406601659156	4.9258008993102615	4.884147543541827	4.431773992320533	4.167696348925209	4.459072473710087	4.782898536797823	4.408330424921006	4.25135370479921	5.141942549807267	5.191311421658078	4.570449811775652	4.935901227737658	4.965328944376656	5.179471714549154	5.195741794941435	5.191923084900563	5.1708127337743885
pos_590	D-Pyroglutamic Acid	metab_589	0.575633	代谢途径;D-氨基酸代谢	130.05	5.961303251649452	6.404647857630008	5.985335143890255	6.1857722829611435	6.473274005058785	6.364397093056098	5.675642342412603	5.918991734993888	6.4274931230482615	5.708382188596108	5.916665646352773	6.323306823241028	6.085050856531564	6.392135580204249	6.195080092676497	6.361830513219119	6.003479234871838	5.968082238994782	5.9799211263479615	5.831392313220812	6.011193795073459	5.609806755699734	5.857390221008174	6.388215921047788	6.169465504550892	6.109474953843678	6.177618954828232	6.10448588714205	5.9358631132249835	6.332650765736643	6.106481079096477	6.199743549738125	6.275493400541782	6.2919036191238735	6.040076542017094	6.2860469334809705	6.155322136449555	6.151205190082469	6.171987914716115	6.136099561062991
pos_592	Asp-Gly	metab_591	0.575633	-	191.066	4.466927195525675	3.790511048887601	4.565918669046245	3.790597469521951	4.148358812433641	3.751626031367808	4.060782496002067	5.5543405381924735	4.980880593768989	5.682334266736902	4.463403017122959	5.433326232720917	5.165345140666798	4.232393759658819	4.546774660958175	3.5858961622251497	5.041573004801013	5.874272967480417	3.998306658403808	5.018660638760677	4.779572942951077	5.907115519604193	5.463115985819161	3.809355227357512	4.847906385722249	4.4794733299783855	3.6092255717795454	4.79199966156152	5.734316036266048	3.5789178755532665	3.7804009608100295	4.898736910406979	4.780833035123155	3.5817551540723875	4.614980641223832	3.743155805974428	5.135335196588319	5.178188914876691	5.123231690826878	5.087925044244957
pos_593	2-[Bis-(2-Hydroxy-Ethyl)-Amino]-2-Hydroxymethyl-Propane-1,3-Diol	metab_592	0.575633	-	210.133	4.280873854938218	4.520281096761372	3.06286255739191	4.404157125742414	4.064913736946726	4.334611177128538	4.391941746944797	4.041635214090468	4.396409863517742	3.1170160795561745	3.095417515866533	4.603401693367478	4.010506600989836	4.559037843117291	3.037902897264561	4.766902870043054	3.1080180612105797	3.110812438751968	3.0913725688671776	3.5000270664837654	4.286110231379216	2.990263386007768	3.692431072388393	4.098063135686564	3.4703345513437904	3.3543974683966487	4.252134514872388	3.4086323172538937	3.968717000607224	3.0752955415891003	3.671881992073364	3.130556211562771	3.041923610683156	4.438453754577627	4.085380982402169	5.970287338813714	4.451470740247516	4.454315662512478	4.336682410522607	4.477042194710219
pos_597	Lys Asp	metab_596	0.575633	-	262.139	5.452378813141433	4.627841230315653	5.4656394935312855	4.114950450823844	5.337025445893124	5.660374421979007	5.800199795925697	5.856914093316712	5.1710444894553085	5.067937778600908	5.5312914062638185	5.508110477802017	5.645939825792958	5.2457325678507445	5.387240814067801	4.497598888341648	5.2993547307050894	6.204149352918915	5.232389099516501	5.889093846530652	5.288436578477142	5.451214460538154	5.45796438263625	4.488043787664638	5.263499029141539	4.876125217688231	4.759655503769049	5.369596025480209	5.831416724096696	4.781673797688467	4.793496200991469	6.039296542427065	5.303247358379647	4.539618453629881	4.499366175445615	5.177309088256719	5.4182449318412536	5.481485825566344	5.516387316834859	5.493042829741227
pos_601	Fructosyl-Lysine	metab_600	0.575633	磷酸转移酶系统	309.16513150599997	4.9464980278629955	5.202125880881821	4.433589135219084	4.696817590581293	3.774432605616963	3.8727996729677145	4.099409868230964	4.4465530870657926	5.809339390994463	5.019218331872269	5.7460881694177885	6.444905620175701	4.784841624184064	4.956888799049422	4.213849653149513	4.689887664511115	4.999710084188389	5.3095017913008435	5.671134605084207	4.133807088940804	5.041172252068061	4.825752211776186	4.596716466076229	5.428851915295668	4.916693588567791	5.251066464283993	5.056918980346254	6.117420333084332	5.59578222087739	4.898927087797781	4.744625752768888	4.62707053228979	4.949704066320437	4.5320293765617095	5.609842064994007	4.576550663649439	5.3386940841633015	5.361858177780982	5.366134444910361	5.2527341293884815
pos_603	Glu-Gly-His	metab_602	0.575633	-	342.139	4.727589650639389	5.182319831913651	5.2510130091491485	3.982271477293033	3.7943283663249057	5.346350668644715	4.829674473865738	4.816776478133471	4.950455299995039	4.933264217867559	5.692607780917872	6.2109689520201	4.4636677359959664	4.8755482338392735	4.205833352548747	4.955944582406078	5.472291563432656	5.0245967650495365	4.427677913467627	5.3276572989947235	4.259205826763227	4.588956171722193	4.02223413357121	4.609533205714096	5.250211936536738	3.319111714674646	4.195856173771018	5.065321442149892	5.771931845446483	5.021581796284877	4.462247015577699	4.828847069952516	4.302889930218703	5.057678878859014	4.8714343719109845	4.7770468950060065	5.125328553914965	5.1304433488655645	5.299010967491711	5.078547793205507
pos_627	Chlormadinone	metab_626	0.580967	-	363.176	5.739046467493008	6.69338117349842	5.7865224965435065	5.945911242524657	5.001475328305638	6.160515016177095	5.338304182437269	5.465768029835634	4.978006505060048	4.075467835241255	4.555250824141332	5.279453456544905	5.1161494563621135	5.759070154057532	5.073246084022513	4.417588153099269	5.137183287514553	4.9842311137314255	4.909579935020192	5.612528716692902	5.150329593140087	4.440653550879102	5.3003565594604725	5.491013887248994	6.283032520634885	4.071218849162216	4.666569786788645	6.04685042004459	6.193300212968049	6.068827102551253	5.4591370791208105	4.909943809734288	4.966892478442582	4.036555269392114	3.96284850178747	5.355596611468519	5.66769138239064	5.7186608478882075	5.668341572191273	5.6266288254831816
pos_629	L-Prolinamide	metab_628	0.586233	-	115.08637042299999	4.958037395338381	5.113305761811249	4.7616878315461415	4.992839105259832	5.480951706198312	5.2436088878191605	5.321782261409987	4.921276270078535	5.079681694777345	4.9198773470876205	4.6763291151245845	4.77618	4.8808290102963285	5.2391250685348885	5.1159378583903585	4.544851953127696	4.5887782021753445	4.702397127761562	5.071997262038397	4.658425099287116	4.751564318370869	4.6472973955540775	4.9580779779458855	5.3468635259836805	4.787460356049109	4.846776369755084	4.883335582076689	4.801964408302345	4.6039395617653405	4.961088082206468	4.952014306163743	5.219697851612307	4.979447326714985	4.886090335273347	4.884515791733216	5.2089001327272975	4.96727806626612	5.0113449573969815	4.96363485896412	4.956216341747188
pos_630	1-Nitrosopiperidine	metab_629	0.586233	-	132.11289317799998	4.641812568120192	4.224726985232035	3.9640826591316567	4.537215339315706	5.24228367338406	4.150235114464233	5.2589867552829235	4.7051587181986445	4.591968037334391	4.516347265461519	4.4263554846374165	3.8453236821012284	3.772946158328803	4.257536009414185	4.69049315598174	3.8005760136878255	3.627481032568348	4.166148985277061	4.966258925280742	4.1233297177670405	3.982415615603153	4.407465945854171	4.4030131762907185	4.395988340257721	4.373464758514024	4.001479528743712	4.179218698745319	4.0888311855716495	3.7155915237339774	3.0701578539706533	3.5029073106137316	4.89552836041888	3.4981521998353933	4.434984979434909	4.614829273299865	4.928939317265867	4.473077120158457	4.5483962236583615	4.579331455329906	4.446444723249284
pos_633	L-Carnitine	metab_632	0.586233	糖尿病性心肌病;胆汁分泌;产热	162.112	5.15552281165827	5.56760477891488	5.156574289759671	5.402162380215984	6.8585297469946385	5.123882509204306	5.3117646659472335	5.1504729237418525	6.138412059742862	5.2616709841094265	5.2613968833821465	5.676754209189313	5.88042876640533	5.262553752449907	5.646439909350997	5.5814690393745865	5.738064988296782	4.8754832598759545	5.457873528588387	5.248387445961031	5.3427280611042445	4.935019159629082	4.999532833167292	5.612999781114963	5.377379341646763	5.547551908186005	4.978676256643967	5.160293697499905	5.651903876809758	5.511648137485978	5.149919017056575	5.414270616748742	5.305754286787532	5.7221386030592125	5.582975716582985	5.352546225678327	5.686116575854117	5.721376677146361	5.677994513035686	5.6694235207527175
pos_635	Citrulline	metab_634	0.586233	代谢途径;精氨酸生物合成;次级代谢产物的生物合成;氨基酸生物合成	176.10260593299998	5.5613400469674845	6.203137136286651	5.606529816958293	5.772024572259891	6.579762632779187	5.84893149156245	6.098833943108892	5.321530330869655	6.491852353486849	5.9502846994827925	5.8920838863465175	6.28101323475013	6.1215712614536475	6.022911451304426	6.454807962862557	5.211395284589761	5.51589270216329	6.072160073251967	6.0406908716523	5.543854198314536	5.7146948604877785	5.2030912027200085	6.006562203393412	6.5570317908569455	6.029969889987765	6.450214450322759	5.917517030120141	5.934346006899331	5.939676859609758	6.2879755254570044	6.142368980424973	6.199874997675482	6.069735107347081	6.189294140425036	6.004662078211965	6.297170882103965	6.09704097942943	6.1170687549645315	6.106854610063026	6.082536401090143
pos_643	3-Ketosphingosine	metab_642	0.586233	-	302.243	5.183539001114101	4.851427956516676	5.989382830177232	5.682323218454855	4.128837891031742	4.9936910493396445	5.500906926779091	5.276017297907805	4.407843199840446	4.4496937710895805	4.235715224954589	4.336315472970046	6.156621647039065	5.540302878525224	5.868424110448983	4.930398782687644	5.763896984879277	4.224714522492838	4.519898496919248	4.239228835611812	5.939279507796433	6.1114614806889405	5.345126984022318	4.677603874767584	5.026195813151409	4.344754736744696	4.562781766308995	6.134466471541362	4.829207291948936	6.448649655024611	6.754536807859358	5.533912227226623	5.720755928260242	6.006810592999432	4.599768925777692	5.674026980041293	5.653377298502848	5.6739827751832745	5.6397264856596285	5.5710200527643154
pos_645	Arg Asp Gly	metab_644	0.586233	-	347.167	3.3118307083895644	4.493655662557126	4.437129583053486	4.1701870572160855	3.517501821374508	3.980409627907013	2.6901937661286666	5.794034192937014	4.032079900929918	2.118275028310708	4.455819829050626	3.916193875942297	2.8525433986416027	3.8755816978040887	3.6282036675113982	3.8434227296273376	4.210959590253244	4.811886623794363	2.674409252629537	4.6686653586177265	2.614540701490499	5.702512248124836	2.0793411716661243	2.9446485531866218	4.0876985444732385	1.832748133668372	3.6666250716497983	3.36770822786637	4.471558939827714	3.8668526351793666	2.9186771251726467	2.131723733131733	2.043744333627408	3.8616147974795583	2.0066230746199603	2.6312861821553377	4.41427677249794	4.57890897097688	4.436956583190215	4.476676120594567
pos_648	Melezitose	metab_647	0.586233	-	543.131	5.098880208725771	4.585243216835528	5.138221896492298	4.0570555348564765	4.288212168800777	4.521323356534049	4.68307226257724	4.677496593230785	6.666561917250488	5.449865947355988	5.541762561737291	6.0382249199927225	5.989097408008343	4.150077921670277	4.1431773456512335	4.187579929519208	5.0077710979893375	5.042123415072996	6.638954438903811	4.26867017097394	5.816100012812479	4.095495271716035	5.395488491073119	5.3016873201005295	4.532767994415044	5.568633407370949	4.210913759268046	5.22973258420452	6.254123631716185	4.180600273871962	4.775489836594115	4.8312222646146665	5.186543364959887	4.183438111653718	5.8396735111509965	5.462010860619071	5.8706971410463336	5.834895530746769	5.7775985213269685	5.788479534781523
pos_676	1,N2-Propanodeoxyguanosine	metab_675	0.596983	-	308.134	5.022340721511948	5.664660526279538	5.117617422098277	4.813308066749708	2.124312314263492	5.474025821729658	4.905461649066055	4.760280360422686	2.00123237620858	3.5669893463710287	5.942334478193921	5.521823597748761	4.703332341303889	5.227039322972106	3.83545253569813	5.097791583556629	5.539981306075877	5.385811618385091	3.779925239173859	5.062744321231084	4.109865936810516	2.072899812920022	4.717123486218504	5.387354472932193	5.30299023703367	1.912781958417093	4.902524995676433	5.238317032890988	5.3888882929115685	5.458002379997484	4.787317735758824	3.5580728755179605	4.971620454834032	5.287451805768892	3.1797752686238905	4.232459642017076	5.111657979174893	5.049847137153533	5.071134440486361	4.952556756707724
pos_680	Histidyllysine	metab_679	0.596983	-	347.181	5.015284702767136	5.9519655619140766	4.782434946817411	5.504835140821973	4.195332964924608	5.485390828150983	4.471584223198613	4.6169213330468795	1.9594619243028035	3.877505228322893	4.149779339626075	2.0464610237551883	4.36041929523709	5.1889608150235205	1.799324397843886	5.325944743510472	4.31595903656983	4.27808186624833	4.2742226529876035	5.0487226429476335	4.2268611911487834	4.225998359485048	4.613582823406754	4.641326385100218	5.3146467160385855	4.005538578558538	5.300009787554785	4.7242679729191535	5.227957042213922	5.508348921239135	4.5479386090611325	4.742392088214071	1.8032851912081067	5.290022978777048	3.9781221208865767	4.374196555461086	4.8678389226575085	4.833178677801855	4.782920678996229	4.870645069670238
pos_684	L-Glycine	metab_683	0.602317	赖氨酸降解;次级代谢产物的生物合成;嘌呤代谢;万古霉素耐药性;辅助因子的生物合成;碳代谢;初级胆汁酸生物合成;蛋白质的消化和吸收;乙醛酸和二羧酸代谢;硫胺素代谢;D-氨基酸代谢;卟啉与叶绿素代谢;神经活性配体-受体相互作用;突触小泡循环;植物次生代谢产物的生物合成;代谢途径;谷胱甘肽代谢;不同环境中的微生物代谢;硫辛酸代谢;氨基酸生物合成;甲烷代谢;ABC转运器;甘氨酸、丝氨酸和苏氨酸代谢;矿物质吸收;氰基氨基酸代谢;膦酸盐和次膦酸盐代谢;生物膜形成-大肠杆菌;氨酰基tRNA生物合成;癌症的中心碳代谢	76.0392	4.48901250146397	4.828921309997329	4.424028782648845	4.512784683097669	4.918423386825348	4.608804560881595	4.269916729692303	5.003123197375554	5.660363489940188	4.49428184288337	4.334482663010185	5.2664301944072855	4.731496957621208	4.7025482421929645	4.823650635849336	4.701803195130182	4.571050830412212	5.092754219181232	4.805811172165367	4.4586354014383325	4.430705695820042	4.687328949171072	4.499556459810137	4.889366320221783	4.6098274853098165	4.918806276313753	4.367029940963366	4.605230861428184	5.29962159284364	4.706578056117918	4.49138546794574	4.700158751339706	4.6210849615673135	4.775755244000545	4.878378927298737	4.813399512777479	4.81233250541641	4.835825728273182	4.85263705159718	4.839422797374898
pos_690	L-4-Hydroxyglutamate Semialdehyde	metab_689	0.602317	代谢途径;精氨酸和脯氨酸代谢	189.087	4.3768058527788485	4.9084427439841685	5.201146607722922	3.6557079226951497	4.509119505507517	4.537222710679557	5.039271536145688	6.270616422240558	5.1507077053154555	5.248024849754824	5.445095225524222	5.7020034245443725	4.889584673710849	5.00480674347739	4.740442356249696	4.408281475083592	5.2603073153242175	5.3944261681210826	4.802264718498579	5.343385864745115	4.775207452004991	6.2960126988222775	5.5079687859449855	4.640319629384448	4.886286488233544	3.641508827479039	4.252463934421133	4.922498791816908	5.065493393727492	4.399731655629563	4.515911266726997	5.0615091612560486	4.725177667977524	4.344997672020964	5.005815697961735	4.286943669488188	5.287537156343876	5.3067997912768	5.374246912076173	5.3015457082756186
pos_699	Lys-Ser-Oh	metab_698	0.602317	-	342.127	5.128024074016267	4.664559670126987	5.303553017665185	4.101000004725293	3.8317024661807153	4.894443276889693	4.604634010456278	5.270477184041825	5.2636224421415365	5.247745624444626	4.893774393556023	5.5576458776224245	4.897807333416809	4.375573498849263	2.979653277670036	5.275849984179838	4.886858562251328	4.106085431877574	4.212724848474963	5.174721838922477	4.5351897878127305	4.471762436286147	5.0929748721894015	4.5630706859612635	5.064040366541263	4.0788940149996025	4.734961792036648	5.25417004261291	4.9559031545066485	5.308365289789916	4.393717435649894	4.086991842004174	4.227804042132259	5.570484391541744	4.859160386037847	5.291479522705506	4.97635231577131	4.9256129635712105	4.8229068004282825	4.689008097243359
pos_701	2-Phenyl-4-(3-Pyridin-3-Yl-1,2,4-Oxadiazol-5-Yl)Isoquinolin-1-One	metab_700	0.602317	-	367.12	4.889537433097578	6.326261856232362	3.764373164295381	3.710213447271319	3.649297098282472	2.0072691566102105	6.789726741589464	6.269915376165874	7.107174727677328	4.417254824543477	4.177439871717275	5.41466599228036	5.349847872354081	1.9396789004974344	3.9329343965862162	1.976770409576329	3.883328204487533	3.984939620193624	4.445197746163841	3.792682384955409	5.33161371254865	3.0575919700130854	5.00926235821284	6.487145591892721	3.2749714501657072	3.8810346070172077	5.556042363256047	4.3378654534015375	3.8354622718764895	1.9698645219771325	3.5051366682600915	4.186081336005542	4.100761465733068	4.018657874604999	7.294536466895384	3.3668600107178737	6.276058919871295	6.273062796024041	6.283617234130618	6.293622295986581
pos_709	4-Trimethylammoniobutanoic Acid	metab_708	0.607583	代谢途径;赖氨酸降解;ABC转运器	146.11723125700001	6.580381225291549	6.604663687836008	6.7367787855570125	5.515052196748358	6.252575433454808	5.775808525913353	6.87708753425972	6.080918564054345	6.294825341877737	5.691281943788563	5.950085390247407	6.166617534583247	6.640012049118981	6.1511607249849725	6.5174943705562205	6.443051581775621	6.383521411026442	5.915988443892277	6.187565259729352	6.7101816773409055	6.358017629602858	6.630865250134548	6.284401902189447	7.099024269398155	6.477166746118844	6.3008665967824395	6.026477776709461	5.693224456904818	6.029895181837651	6.170326517141067	6.3105172244984855	6.355265956922708	7.185220244549607	6.290457030493869	6.237075626300304	6.841538230213268	6.567886220558951	6.571280338791425	6.553428111591468	6.574612497417419
pos_715	Muramic Acid	metab_714	0.607583	-	252.107	4.619638318736979	5.004383944488746	4.800520643028295	4.794068821676691	3.644466633550015	5.164448877795303	4.621035804690519	4.888690983366057	4.857020110894637	4.30593689022104	5.442154565088375	5.5510671211431335	3.7866551413112304	4.756354107021711	4.66858686038579	4.858931164241862	5.001631615358576	4.973682499293309	4.77006696189347	5.137882077995871	3.6512327792535086	3.5980137017552387	4.67078310344938	4.618740123870992	4.471512099953878	3.8204286970981776	4.794581415832019	5.303313318277799	5.371549473076935	4.925076023869472	4.7326655830610935	4.349841647684279	4.2451722165964005	4.873780488412974	5.322988982230512	5.001220874447169	4.939514738045988	4.996805530112256	4.976593866133354	4.889466870724384
pos_716	His-Pro	metab_715	0.607583	-	253.129	5.931107078526714	4.551834450209771	5.304857073775749	4.809836082235362	4.88415601950206	5.691478114847156	5.859164616489582	5.4258410461692845	5.902640591682714	5.7221947364228924	5.781552091410822	6.128059710683195	6.063017132298455	5.825046326136878	5.117538163313567	4.991218065883062	5.723718795017773	6.009142348207253	5.665022047355054	5.716169229432452	5.961505349337887	5.5367312566544715	5.927152341791731	5.105510571507193	5.230096753975092	4.854376766785628	5.106261003096843	4.935523973800287	5.441797445203253	4.978790458886196	5.531971138820182	6.132843541738135	5.924630355665575	5.027092486365957	5.679532782966156	5.373726622672048	5.603982968070017	5.5864285224240255	5.679926555940074	5.658068005791555
pos_728	Creatine	metab_727	0.612867	代谢途径;精氨酸和脯氨酸代谢;甘氨酸、丝氨酸和苏氨酸代谢	132.077	3.7192079857715736	3.547528767342796	3.5039601395250344	4.014782439212554	3.754975686983925	3.4993429016427116	5.8842808133640565	3.4043683410561365	6.6064613857675	6.349810119257379	6.469101009996168	6.1112931864243425	5.9193910780984345	4.120191429604269	5.178081563794847	4.462164346785615	5.58927526113126	5.697391338648536	6.718572084393575	6.300671108746909	5.818386261619474	6.198047075130641	4.256795690013057	3.6535624206498016	5.936974729062335	6.440826382797776	3.4867226654178367	4.559794543615879	6.439982641121408	4.175404852720609	3.8989921246439465	5.906659438989422	3.3481272785068383	3.3843508276171352	6.421757524353214	3.248992168984697	5.935021000957832	5.9404562190339245	5.9683015580134855	5.945763884412023
pos_738	Imidazoleacetic Acid Riboside	metab_737	0.612867	组氨酸代谢	291.118	5.5491013199682335	5.517787462605237	5.272842837513145	5.099311831741909	4.4402104471226576	5.732704867539916	3.818581269738078	4.908086692590499	3.1966500318301	3.6573775335444902	5.292727616030966	4.986413022069437	3.1194577262536782	4.852144079362153	4.147942645073857	4.228869617631093	5.1205387140997605	4.483961418432871	4.341613462010005	5.005592786038879	3.943258685591704	4.3127617594179934	4.2013078188605295	5.793721907932737	4.919901248767952	3.0193165326145683	4.684135016307196	4.184957979847736	4.2986371936216985	4.459373289229114	4.842872385825833	4.480948023679133	4.976992800727212	4.353072863156358	4.945858688185816	3.934374328992564	4.90992721935458	4.8986014943391805	4.979512404601187	5.084309068537109
pos_739	Val-Asp-Ser	metab_738	0.612867	-	320.14464260299997	6.0039333784813405	6.007782926145012	5.184827054129476	5.836724908870676	5.629440363224825	6.27008578932216	5.630218227905938	6.103474537116883	5.5698810554111535	6.25677298028686	5.9083381897779175	5.818522647983795	5.915103344555969	5.799414974238237	5.45145233955495	6.5126203834412175	6.014579670430358	5.8642178025370075	5.825861108256443	6.041138962551812	5.5208495554186925	5.4724546491892685	5.888898850487464	5.951379811999326	6.146099607152518	5.345800092412532	6.095242169065206	6.115432072976486	6.092397718192418	6.562428528545089	6.039441458501848	6.0556209276350765	5.637615788938197	6.657515537540068	5.392600877533517	6.416120065711026	6.036756696569334	6.030499503376273	6.027384956437772	6.028253447767518
pos_740	Disperse Red 60	metab_739	0.612867	-	332.095	6.176867230819865	5.4583979236640365	5.318321342821184	6.181217407311668	5.606716425686159	6.21647115923015	6.639467562124307	5.101967820348494	5.616151633006922	5.937948405686663	6.005783808832723	5.858701041489187	6.319879498071747	5.755320455932933	5.754211885959814	6.245023607706435	6.064196769951497	6.1981042120116125	5.417659834168794	6.325352591314236	6.253406565969839	5.608180743744963	6.148877257782327	5.689608557838032	6.295786005032438	5.945232073616544	5.754315272250363	5.7841765507088985	5.858200923472457	5.12044	5.0685596978730985	6.109259902667683	6.200542461816528	5.0819423917038105	6.108807826260008	5.415384941822124	6.00227518219592	5.9999152434371945	5.981585697580093	6.013527685718647
pos_747	Halometasone	metab_746	0.612867	-	462.181	5.247077722252318	4.760207992743651	4.848767949364863	3.0648083803065576	4.2438594543983195	3.965085060074024	4.871507913096015	5.858425226230878	6.931148069429338	4.323225394896921	4.435411443153754	6.2743717667497565	5.883625460253395	4.6994682901364735	4.258595869005216	4.222292109667127	4.65819998498924	4.454420708513464	5.051624071915591	5.016522893813272	5.610871873988504	5.962529389293879	5.731750602924133	4.709858818496444	4.546267738223684	3.8172265354599673	3.2185663481829594	5.1554929111538135	4.996554867623087	4.326291067358556	5.418696720889647	5.443096814567517	5.054796646049282	3.1911061031920505	5.215628237201497	4.487218727099991	5.439081406507449	5.592586599198872	5.545191513325047	5.5752828974740325
pos_748	3'-Azido-3'-Deoxy-5'-O-Beta-D-Glucopyranuronosylthymidine	metab_747	0.612867	-	476.16	5.37194520835182	4.8300015499893005	4.641364604698795	3.9745222315052615	4.276670019996131	3.9363069068388974	5.118338623284095	5.690947958493996	5.543970255691859	4.070176673986121	3.9186547480685663	6.549297106457562	6.067631348134839	4.7501422795580615	5.028905663888295	3.9054979508252377	4.5561742440061535	5.064896206912287	4.937777840427139	4.975643336586715	5.529667707377449	5.214639882805126	5.683538369877511	5.2081184963303855	4.441978274185328	5.240199146007266	3.9288304314257454	4.839081487274687	3.9445831055608513	3.8985187130237215	5.2949111515480745	5.657202593855494	4.9748412603396215	3.9013563801043385	5.067623765003072	5.402119162898323	5.324396841969172	5.330447461477581	5.444273595354876	5.340003093447044
pos_755	Aspartic Acid Methyl Ester	metab_754	0.618183	-	147.076	5.185057225826223	5.482894905010278	4.954791589729937	4.424297604716913	5.424128327716018	4.885487177395142	5.198191328153431	5.442798014642566	6.135057899462169	5.450049118046722	5.16946761350368	5.9730697775171375	5.656195737235455	5.199155166595403	5.748355238788803	4.690060278705951	5.640865783311115	5.685330686087422	4.886380511106498	5.194803289764903	5.52090126295923	5.592769394745994	5.376426564665582	5.583706678341292	5.787593586332963	5.664997637205597	4.702078864061837	5.248156176336521	5.702927730255313	4.38978910668149	5.301082107689039	5.723475798048736	5.610119503182738	5.073780440413027	5.697603334819332	5.832885571719773	5.497494981324876	5.5071507339360615	5.531121846826547	5.478524110251668
pos_757	N3,N4-Dimethyl-L-Arginine	metab_756	0.618183	-	203.14992778099997	5.494126156650632	5.814343892658693	4.828279780131259	4.513472899759858	5.677972445167482	5.3372404084346625	5.250887089587266	5.8977756058122575	5.8954819360570525	6.088295550855823	6.202761362644867	5.640767900841823	5.466826716442988	5.925730577499635	5.680819542038468	5.039312507030628	5.929232491747083	5.702254650007983	6.09988	6.088347856871699	5.660880010447121	5.878274156545504	5.755585306641611	5.0700685466726405	5.5466135154743395	6.081343318652147	5.026203548559116	5.411635632676394	5.8671286834793746	5.598617982992958	5.167284272228047	5.768067511396681	5.481139647452413	4.451941318834146	5.7124796843420995	5.612975464516888	5.672043938704253	5.691338264414201	5.653621507203439	5.668273020386819
pos_764	L-Proline	metab_763	0.62345	代谢途径;矿物质吸收;次级代谢产物的生物合成;ABC转运器;D-氨基酸代谢;精氨酸和脯氨酸代谢;碳青霉烯生物合成;灵菌红素生物合成;蛋白质的消化和吸收;氨基酸生物合成;氨酰基tRNA生物合成;癌症的中心碳代谢;新生霉素生物合成;星孢菌素生物合成	116.07038837799999	6.41935654818634	6.875713596338088	6.2627281989179435	6.810208790915911	6.952606754655898	6.6889209684379685	6.259720690504618	6.755845191722523	6.336279823322343	6.290946183082644	7.224589477163204	6.707319940831374	6.505124349998263	6.727699930290142	6.853808124808112	6.7366068883506705	6.470765281741077	6.630900319476073	6.549373765846663	6.430271602567882	6.470051862006156	6.469090757785463	6.388693351264868	6.812369967916638	6.708037332104201	6.957890587859657	6.632093818880928	6.621664420225573	6.088344874413066	6.77631654497025	6.45926396211705	6.628208128857592	6.653446674674037	6.896313997530742	6.568691338121175	6.716510988801852	6.696569588999328	6.690822256923246	6.726008956742227	6.680858128106582
pos_767	Thr Thr	metab_766	0.62345	-	221.113	5.246613968230153	4.429118906590992	4.796005767795462	4.0179904000738045	4.774331100875968	5.370735687834457	5.6058231840848425	4.890308554595847	5.1875678717577465	5.545709318160894	5.142247004326625	5.523053215572992	5.724572574949187	5.17724191466422	4.798380745128073	4.316812476216732	5.567861603928884	5.239563643766063	5.155085148583917	5.720213321526015	5.5237305852995195	5.113555106220119	5.689565214258164	4.437132696852086	5.315521301343862	4.644469897352733	4.582097969162472	4.455238797558253	5.541515717463528	4.042056687392106	4.598932575651184	5.789393912038454	5.3435487792704155	4.491575886066153	5.163949210996176	4.6538657629225915	5.215766846783467	5.224288790254379	5.270864170403531	5.248843814492581
pos_768	Asp-Thr	metab_767	0.62345	-	235.09214444900002	5.460256874576877	5.013376518555907	5.220635465420068	5.16156024145548	5.122425731493268	5.57526250859254	5.767758375393638	5.390705118782767	5.552995448718119	5.809490176529255	5.4981899195034085	5.785101731647378	5.793126305921768	5.2053612413935335	5.297008297561481	4.97085682760154	5.723477358604221	6.430443992352238	5.4283886978882805	5.919410206532936	5.5652315460544575	5.569462669239682	5.763535974799797	4.833625477857268	5.505169610018323	4.944816520727876	4.74616227677129	5.103162347988134	5.865442247845794	4.6750544544885315	4.891041482353578	5.967546964739943	5.727808123385093	4.872977864834684	5.407282965005889	5.012728694224847	5.596074250004581	5.6248959254920745	5.66257481019207	5.615517116210686
pos_769	Asparaginyl-Proline	metab_768	0.62345	-	247.14	5.744420992229527	6.255115472376822	6.259699212140287	4.6737747968250165	6.169852463663081	4.517270454161752	6.1207686673924515	6.534123262826916	5.210775382312193	6.0342771800331745	5.883060904673146	5.472532915748709	5.270441890015711	5.068432304541076	6.403444287571925	5.037834155505012	6.0942807924990126	6.099999629751734	5.897918383420375	5.6196576888186645	6.066976410293188	5.9961434930004796	5.815294245161617	5.84222481000278	6.036717911772279	5.429017680495381	4.999713560449427	5.713287233598008	6.2994812818724855	5.142859924979062	6.403715072420829	5.449741029545245	6.270820116609584	4.16931183720062	5.663706296925992	5.709763404037467	5.975013690801608	5.967938899736866	5.959970296257435	5.971282152298282
pos_771	N6-Methyl-2'-Deoxyadenosine	metab_770	0.62345	-	266.12279160099996	5.320598896503358	5.089156407664642	5.2676882876120805	4.8076043535208	4.144332503345576	5.447470105632631	5.273426861788472	5.10186940821385	5.823661710221976	5.836359859716024	6.15132984105837	6.695652917146659	5.084047928804217	5.167622313001667	5.3504899877385865	5.404833307525268	5.282066484004816	5.398487827204428	5.352657308354568	5.87075220920421	4.925050943806951	4.664623656011513	5.278088208724293	4.7281680516103535	4.906804273839529	4.435688477561229	4.641057772749853	4.962172790744996	5.988939157094053	5.197275543264913	4.809446033817668	5.037143887930754	5.324477358042203	5.0749140899937855	5.983746849338948	5.689278162819417	5.609807124739887	5.5796166404795615	5.588146703188748	5.614679033732382
pos_772	Asn Gly Val	metab_771	0.62345	-	289.14992073900004	5.301769666032956	5.56707660035477	5.6638165139535595	5.305083048024015	5.188844237030232	5.835361118941496	5.503961298178459	5.444696001799934	4.885044295090231	5.719026809714682	5.349847197275603	5.22195039622357	5.445411356335543	5.47400163570988	5.232640862372012	5.14405946284109	5.623593321242769	5.2168913540218185	5.221933414110387	5.303065993458096	5.075295034513396	5.120195252998637	5.681582954134407	5.42359372775969	5.403973551419353	4.723396952868332	5.5911264897062765	5.757263302491897	6.120597732342215	5.822169140433211	5.847861900391972	5.451966438071868	5.210483175210036	5.0528432818335585	4.86464113758855	5.504014991989815	5.493695891328333	5.469667362693938	5.551041556306193	5.482985620622507
pos_773	N-[[1-(Thiophen-3-Ylmethyl)Piperidin-4-Yl]Methyl]Pyrazine-2-Carboxamide	metab_772	0.62345	-	317.14495481299997	5.021021880809848	4.67238361643298	4.992878479870162	4.658254192827084	5.140935328650757	4.171518170158163	4.7056524195065235	5.978857301426637	4.218672856929285	5.754522742885902	5.708167508769551	5.290488231307312	4.1095211615692016	4.835042820485112	5.30278577457759	4.546031083552102	4.975507122571519	4.9008930541827445	4.483810457829272	5.24934809723203	4.263947389174078	5.480059720062472	4.934346679348847	4.5702717588799375	5.649411903228635	4.971308071850748	4.419448375585133	5.462413135348107	5.993768712482482	5.148578642583047	4.894058844225193	4.35828619147905	4.6260743617645455	4.46284312557002	4.375969635809319	5.432211312981874	5.239578904370314	5.2387197512526456	5.2507276435033585	5.2450101824851805
pos_793	Arg-Pro	metab_792	0.628733	-	272.171	6.0905679620042505	4.878244368893281	5.590486495098591	4.725792293918705	5.019096276564592	5.509456615132391	6.375297517558306	5.514793797167525	6.082883928122246	6.043468930781617	6.2684157172501465	6.152491253625864	6.257189935991808	6.0460970876821785	5.320220667513985	4.9490286100317595	5.943793001124092	6.420537963677274	5.834506243159517	6.275749474516902	6.06235523540829	5.992366229216873	6.1994222123242215	5.401447123001381	5.416125774512908	5.219768892615621	4.944141311923629	5.131878949612182	5.853181563440224	5.020545064060737	5.745228662792765	6.3716333185318055	6.35384464425179	4.89615567984401	5.896046626664269	4.796071733033619	5.889183695649183	5.908057792545451	5.8856146403863	5.8938817723624775
pos_794	Glu Gln	metab_793	0.628733	-	276.119	5.930190357246156	6.788344746387161	6.087911996694485	6.5954820899297015	5.856126663939059	6.0684272456711765	6.062910704090718	6.327309736941827	6.016462531107004	6.2939353816244425	6.159783778903947	6.329143804294139	6.2681626117416105	6.138460675376568	5.938534685295267	6.288470107720578	6.3637322065852535	5.8900772894872375	5.943601076356555	6.323504875279857	6.0147932112107645	5.798842153362223	6.216832935141947	6.332698756690839	6.4793826875715625	5.975108065698514	6.286986934883532	6.949652036777833	7.024153831897865	6.721115757314965	6.368731392701392	6.0620821164406165	5.874621701582773	6.813319375566138	6.2098995729395225	5.800414343525253	6.377197585118508	6.3900526882198845	6.396141209444605	6.3912745529884525
pos_796	Gynocardin	metab_795	0.628733	-	321.129	3.5219046885382754	6.351681956922383	5.2708875713941925	4.038152286493082	4.48389165789279	3.694593208912658	5.088766655351758	3.679667126438857	4.2669245065882455	4.0965066404458055	4.906475691889467	4.395423877333147	4.138479168568853	4.04987650232614	3.9090771084400564	3.6637870063625857	4.054409433954409	4.750602791592482	4.667031632017497	4.913247669679688	4.11475278984225	4.2865172734886094	3.882954215738175	3.6192526622518413	4.264596045768276	3.409998497144581	3.6871173838513522	3.9811531349527036	4.757346921182788	3.671246639728196	3.64626599035978	3.7121013096837503	4.061151222980527	3.924652419795255	3.585949258312505	4.317488895476711	4.699450448101357	4.8021353098501045	4.742418903176981	4.700486773339133
pos_797	Gly-Glu-Gln	metab_796	0.628733	-	333.13980855799997	4.265764555448078	4.760953100473296	5.198470822363878	3.914826473747958	5.015446586895116	4.22517749721711	4.745227629678216	5.5837755828913735	5.214591746560071	5.027874532448781	5.49205683198951	4.534372853135023	4.826850776645301	4.5493341833489644	4.751459789825066	4.510170278923409	4.851525307573287	5.096883652170552	4.869470819102647	4.872682741701818	4.611291395317972	5.756428162779787	5.067256696981086	3.9175978759110586	4.7017952927346505	2.0857200616879017	4.008022604172052	4.530251857450606	5.514693112145517	2.331054665059253	4.372799719786101	4.753663975197962	4.559748405518249	4.180805220384215	4.8831820337575005	4.166040864585819	4.947495765605575	5.0604175077270135	4.997104171200356	5.03005369904786
pos_808	P-Toluquinone	metab_807	0.634017	-	140.07	4.344999291877855	4.517127136201892	4.099701678676408	4.41735030234617	4.1348083438664816	4.370503820002107	4.244542346606748	3.613742561769522	4.187602513202695	4.446585461580822	4.107173924905675	4.3753289406646285	4.194635213643943	4.528420937437966	3.4135354606231303	4.4810198095727785	5.223441546395511	3.5994444694628034	4.16664535359994	4.036836861301542	4.336981952179265	4.544768656043924	4.180091042480232	3.945776453436312	4.1086541010576685	3.795295621025639	4.374944140927727	4.087386156213578	4.3895651127572055	4.761015200068245	4.380018164610147	4.016860690975443	4.123893098665216	4.534120146912533	4.000729244949091	4.499185011510545	4.227091478115267	4.267547529470794	4.094344459288812	4.307041606529069
pos_809	5-Aminopentanal	metab_808	0.634017	代谢途径;莨菪烷、哌啶和吡啶生物碱的生物合成;赖氨酸降解;次级代谢产物的生物合成;不同环境中的微生物代谢	143.11758911200002	3.2278024008278816	5.177592491484506	5.159622424039527	3.102176421475625	4.715109152837924	3.7842919231420655	4.356923089541824	5.588163802686932	3.06831488603486	3.7542865024744048	3.5081407329891627	4.69733745521668	3.599162684353713	4.138532242382121	5.076596852955098	5.091755143947575	5.042676488595856	3.261170886959524	3.65975859946504	4.1451868815278825	4.850025181561112	3.5936998879012667	3.5382619103777126	3.6538420858885954	4.195265329548108	2.9789601064893723	5.180770700198425	4.756518498682629	4.100950031352015	5.237674710894947	5.2685332027385	4.638404929598428	4.913833469852281	3.2284819337589683	3.602379609104984	4.275465780732266	4.692923628293696	4.801135282277274	4.762143093704172	4.752028334705922
pos_816	Glu-Ala	metab_815	0.634017	-	219.097	5.672339223809626	5.3722392969571455	5.331465121842558	5.984282157428051	5.364195867990559	5.950005717069124	6.2233554350294416	5.447928755848419	5.526327730235045	5.7326191921960366	5.603430212264403	5.612789915661047	5.6488911472806445	5.4344596823498765	5.153382113655325	6.0607425776066615	5.651499153101188	5.632865788673143	5.907318168709298	5.775142039582307	5.590600783887703	5.670979738512919	5.99328061972103	5.3724632261818375	5.172116739681692	4.828108494074955	5.291212888105727	5.2722495251391965	5.842636260876433	5.62669572587971	5.160489037985167	6.154001355878687	5.628068512170629	5.453706950332567	5.501942443503051	5.3825190907171665	5.662422589156359	5.665973765481239	5.678884385811522	5.681685025508911
pos_819	Artabsin	metab_818	0.634017	-	271.12857880900003	5.1316171681659055	5.321814774454793	5.085128779995065	5.0164547107399855	4.630364375007166	5.18389089352803	4.967329328379323	5.289168811599457	4.414502334341496	4.547113332559365	5.083171387234482	5.12353815183067	4.707258463774469	5.161243775598106	5.012281523736086	5.0849372881180255	5.202799987647143	3.8386054790102766	2.9438166889135835	4.834854035682522	4.979895262025706	3.8273552407698848	5.2652355609670645	5.142751848775956	5.109824048127086	2.103640991884476	5.4339430770388795	5.667067816105733	4.818752179352367	5.380176700410532	5.327630891969492	3.9834355812310376	4.406638091776951	5.113749470073403	4.559388050212951	4.907605969288558	4.999085362747696	4.901076556813568	5.014246726611267	5.030825754496116
pos_823	(E)-2,6-Dihydroxy-2-(2-Hydroxy-4-Methylphenyl)-6-Methylhept-4-En-3-One	metab_822	0.634017	-	287.12383182900004	5.0551533436733616	5.715875892235642	5.218674368531245	4.334271717834066	5.082700620392415	4.933439912197749	5.548220455127575	4.016057654924895	4.631353605516576	5.7909887638883975	5.439505746858488	5.318244643163717	5.250882541046878	5.05863416621866	5.187912128848744	4.814246189041848	4.786902382520832	5.262866186511866	4.888592869103115	5.725068360587232	5.3770936996887935	4.753135547589237	5.711014464700407	4.749889212551488	5.36378886241662	4.0492172646762405	4.577017804272228	4.7877219713422665	5.189839543596523	4.925759440874796	4.658441684807042	5.183281588788905	5.424257059022489	4.6127596013058465	4.944679479684265	4.451504893157291	5.21658554649348	5.193216167192649	5.246044484468342	5.141595605679126
pos_824	Thr-Gly-Asp	metab_823	0.634017	-	292.113	4.395041269951667	4.929557362759634	4.744608756636533	4.4137367944174715	5.358810958856875	4.2256564866338255	4.812827013536292	5.1042384764415285	4.809706567252156	5.396695683772084	5.394825145679961	5.379759568683802	5.081561105127227	3.8660817336714297	4.969820457670983	4.209112784340936	5.068654062875832	6.102517539255056	5.458749662511722	5.442865613786794	4.928588671255149	5.118353296692634	5.197657665494782	3.616415027591173	5.2521291616039365	4.696197793735318	3.514248403398826	4.524890938729972	5.646553274635061	4.507931484170501	4.171358358903757	4.993143541106583	5.1341790874953634	4.328235242371767	5.511639961267886	4.2029324111541815	5.141968750340786	5.175600868921647	5.158621058899106	5.186054909193082
pos_827	Latrunculin B	metab_826	0.634017	-	378.175	5.504513050264476	5.7458465632811695	5.7488402815723525	4.27397874680023	3.7976552678224618	5.9943970878739465	5.7403410187973085	4.924522459623875	5.100821182404168	3.4747936644946376	4.246270770350159	3.8956898113226552	4.786080189940262	5.825550402916004	4.921418742382375	5.637409459885252	6.1591442747422045	3.4685873431554235	3.836003822750518	4.861030771014692	5.069389186534735	3.347977820936076	5.534014478578474	5.412256155830512	3.355769542641565	3.1862937928142294	5.057324388400737	5.7738581724440765	5.1415602842409305	6.179549998029435	4.8738572321483264	3.488339515704719	5.509114120266116	4.8936338799437005	3.362206613291562	5.190708306067309	5.369694631834498	5.3089409545174	5.358872890643259	5.3352844772213635
pos_828	N-Acetyl-D-Lactosamine	metab_827	0.634017	-	384.14955866699995	4.954411599271206	3.722471772841788	4.405859508045696	3.9027449223443282	4.726949196806932	4.080877571227656	5.351134799387451	3.825386330668853	6.26822821048428	4.891851061959538	5.841649208001093	5.406981902491967	6.423899519135772	4.090272221483391	5.771952727570622	3.809505246429723	5.5092549500317265	6.249135572671496	6.076897216459179	4.583617965944969	5.608602209289919	3.7174298344456393	5.108905126506028	5.441652333356871	4.366294320118037	6.0280121740288966	4.591041239699438	4.566257582005608	5.921677152060248	4.4743128678984645	4.297280465746509	4.88868580267101	5.667765491296548	3.8836205922645295	5.479187758138595	5.041515323250507	5.548563628362511	5.5965388454454725	5.584806966008781	5.646172033952948
pos_841	Nalpha-Acetyl-L-Lysine	metab_840	0.6393	-	189.123	5.3826469855255805	5.991304310243679	5.546674240821832	5.82667605755397	6.0333006220707865	6.0433856351729105	5.713127346819626	5.434799211233253	5.257531588321072	5.304435649018162	5.279433299768184	5.287796625324876	5.429146177307217	5.981485419343198	5.435971549482621	6.036900740100228	5.595977323013097	5.5513855679140285	5.436741096244085	5.6885974468089895	5.421315738336978	5.330556315808421	5.834850207226776	6.022604637085742	5.463664695551488	5.28160728270737	5.897242456495409	5.800691954358825	5.672421777568225	5.990004442796277	5.749893478190634	5.970589542670088	5.8385420454989365	6.030697569237328	5.388187249423107	5.768388526557863	5.706733906854748	5.72210176731262	5.727098561242872	5.690007804955593
pos_844	Hydroxypropionylcarnitine	metab_843	0.6393	-	234.133	5.417302994100028	4.441750511151175	5.232677580563754	4.591045026357137	4.712318286985896	5.209121614440863	5.443936912928367	3.720863414721181	5.300704119398579	3.391088862614476	4.544323430325576	4.5309849012923085	4.217485934999706	5.2513821397064735	4.2891151477649085	5.3995904016703085	6.0356232854589775	4.258207850565536	4.198303330602772	4.687827280572326	4.887193776492219	3.800092842307136	4.924511477695297	4.074052839384629	3.272074498357968	3.787666131838352	4.434193218078942	4.257762453730603	4.897582596315617	5.449976429161239	4.4528117023666525	3.404633763452142	4.48792160556448	5.218531787817421	3.640475937266269	5.060659288060305	4.917239571213583	4.923941765505503	4.968971220018823	4.972254117478792
pos_845	Thymidine	metab_844	0.6393	嘧啶代谢;代谢途径;核苷酸代谢	243.09709018700002	2.4478139479672727	4.470628227570086	4.960254391428472	4.390062162415184	4.135873657815684	4.399151267096209	4.294513804069931	5.931750893990384	5.208664734641259	4.364346473865633	4.930639044815477	5.627728132990802	4.2118770824143015	5.040687131513543	4.305640060737473	4.0936092958302215	4.599852003113712	4.813810745308699	2.5983877237946804	4.9067095644931085	4.214861179370566	5.252617363107699	4.985989391521759	4.0741802014625845	4.112406740922912	3.6089647877514333	4.273823964255805	4.9743194531210175	3.9736468529114286	4.544036267733594	4.404241473500524	2.6375072034288984	4.003678918250312	4.751338011406884	3.7977848981147684	3.6303915064231234	4.8130324160421685	4.849437537414947	4.867004228530346	4.853469299846017
pos_851	N-[1-[(3-Methylphenyl)Methyl]Azetidin-3-Yl]-N-(Oxan-4-Yl)Methanesulfonamide	metab_850	0.6393	-	339.176	5.370270841561514	3.88983243693218	3.895660992038705	4.766303543967594	3.7799529255067066	4.220617406732882	5.720109417581386	4.995823571923499	6.209779133202863	6.0011411123238085	4.696641906709318	5.694609706679103	5.885549396338639	5.401769123128704	6.021631051942527	4.914645629612108	6.479659136667683	6.332577228593287	5.8073346600379585	6.136988096952425	5.965472567658835	5.995231459141473	5.966879519452663	4.772985243452267	5.837637468799152	6.293948428579355	4.439064398151794	4.547392454356868	6.131891303837737	4.242441037256384	4.591968712391589	5.9264333273330045	5.1936945204010945	3.346990550621538	6.2804920304608975	4.420020796724061	5.684681350505822	5.686060325919603	5.702410051779169	5.689223489383912
pos_854	Lys Asp Glu	metab_853	0.6393	-	391.182	6.070426866476258	5.432273787833791	6.373563493760346	5.187697280379033	5.950604116391207	5.7839851954640045	5.886913669034513	6.708251958166184	4.810176220410916	5.118913807075889	5.45156	5.547008937765899	5.611218940489137	5.391530144042819	5.351347218586096	5.379353245396823	5.396149713750728	5.597211935129031	4.196302374892788	6.713353619120443	5.544091970277821	4.773486209937095	5.401799245231029	5.2632786927126505	5.220693403398329	5.112187141223711	4.906964871517831	5.901804288526247	5.778191348683874	5.679335823927348	5.257827770817665	6.7244678495699945	5.812636356498651	4.91587582167043	4.691510422565449	6.5763875895672586	5.892568747576691	5.925279973798827	5.9036115473442745	5.914265433051478
pos_860	4-Pentenoic Acid	metab_859	0.644567	-	101.05952112799999	5.596265608439971	4.94213	5.3984376691598	5.322814662314103	4.932900087582116	5.7506405950972646	5.927593612310983	6.6343252474959815	6.561941010047697	6.900819559081885	5.549053109850725	6.228587385847095	5.828029249995067	5.693806274848534	6.462808074166639	5.555615119705031	6.857983834342817	6.400602571535144	6.599358850752116	6.548271361932268	5.932867014952987	7.070847321038319	6.324928601184691	5.686771919176085	6.42520298359929	6.450732949390197	5.059401728213966	5.642673159203117	6.5904370546586	4.93978321434121	4.9026222333685645	6.399990585639262	5.5630270249067735	5.536658528206395	6.437945963654343	6.28655490837055	6.309252260856361	6.326086437538708	6.330804293353716	6.320392053428416
pos_872	Tetraphyllin B	metab_871	0.644567	-	288.108	5.3424625417330365	5.393489075567743	5.420644873893213	4.329396640417989	3.997085114390994	5.6142549754846325	5.17760637744433	4.390931838227325	4.987574547920217	3.610815465232852	5.4446273796012825	5.484965496570489	4.479316688026932	5.1362249714608765	3.5964768978473933	5.049306354467264	5.880410217308391	3.1550685717023352	4.576070703032383	5.286484068924008	4.79886268886171	3.6591790247471008	5.021337359329778	4.7554669882780916	5.016083120845655	4.192826575197277	4.091166096871732	5.225073558430919	5.066109899167796	5.265957677449043	4.6309063920832685	4.254861563864316	4.513425276864432	4.7001547396051935	3.3359213825027925	4.8320844495920525	4.958671150774874	5.019835949539573	4.9804334815465685	5.019566011071333
pos_873	Pro Ala Asn	metab_872	0.644567	-	301.15	5.611765826063657	5.679809476467438	5.524925078685569	5.209836570554958	5.160509749735222	5.2060637304963935	5.466207847669176	5.763321208840835	4.824736172859456	5.884747284671228	5.999365403409286	5.621757052800404	5.15518410847308	5.565159495276222	5.3923086867644585	5.474139265178876	5.669607867350407	5.557595413156328	5.2960854515992155	5.785375106475698	5.162088548021038	5.440782791628196	5.5825411531104026	5.513020152570509	5.630281714834387	5.405500012201283	5.097234399731964	5.869782415710848	6.307544231069557	5.725296853286003	5.52914242799758	5.220385765392031	5.461548897588271	4.993488542631972	5.2264418441898455	5.507579943161732	5.574681084719463	5.620858257684096	5.563689176979442	5.5831827237400065
pos_878	Ala Glu Lys Asp	metab_877	0.644567	-	462.21871870900003	5.852897178101664	4.4350556716256335	6.007782798381162	4.321452839015893	4.390398751631087	5.2823869189045825	5.72744022922352	6.062476847293032	6.328813576321392	5.138586822087236	5.385622868733792	5.152550721788313	5.697355256387959	5.38690498301685	4.915264762758125	5.036875143248334	5.128554208650088	4.534293238555815	4.159893994897935	6.607048798718831	5.248527628895213	4.988750214584403	5.555470280054156	5.079222711327799	2.8817608751323567	4.60883123792606	4.794127012582222	5.1439940104419986	3.4677065179810653	4.766661249695523	4.350528054001053	6.616587919520839	5.645796663201406	3.8707180944123656	5.82982659402637	2.8265680544083884	5.655476431743843	5.634744810699247	5.632025061218394	5.6691675704685975
pos_883	Alpha-Methylene-Gamma-Butyrolactone	metab_882	0.64985	-	99.0439	5.013641436134682	4.778567808569258	4.839461353584337	4.9066552930569545	4.716516498935165	4.7609163907218335	5.021321785461644	4.910771231820305	5.664438575765865	4.770023812992238	4.869361806167947	5.231703252221201	5.0612397906740565	4.942454052034816	4.8722816743049675	5.0015565922638165	4.854123457549021	4.866264524782119	4.974417054842843	4.90102014921408	5.090623200721292	4.816276915080369	5.014273401723593	4.885727646354594	4.813695715014691	4.694562347057533	4.917553922018047	4.902046851953374	4.792298576555182	5.114277158195551	4.761006548240125	5.066664656646233	5.147089161334839	4.8365907554378085	5.024867890915691	4.874958293541501	4.920690869443534	5.003694539273599	5.007312502383137	4.979874112822966
pos_904	Alantolactone	metab_903	0.64985	-	255.13383683599997	5.606035348741047	5.511499367292231	5.5958708824778	5.6565561423781165	4.7763797839274265	5.286184540036727	5.07850713939798	5.114230332852115	2.041053815125691	5.221255548460358	5.638844666546812	5.4661465452171685	5.480582567783373	5.50602287477595	5.53508319806497	5.306560446607149	5.422626453400373	5.112622992625165	5.7866325408651615	4.647145923750193	5.8090417122208	5.464020153622091	5.623776595876591	4.981441014958527	5.329818407883253	5.0738758853437815	5.4118247246489535	5.524201863851097	5.7059006798800525	5.6332027393011606	5.935550569547397	5.222483241660943	5.638973523899383	4.720739006170921	4.6850743152952266	5.344477169651476	5.4347650633591655	5.447991365625226	5.443873654376828	5.416081290919691
pos_905	Glycerophosphocholine	metab_904	0.64985	醚脂代谢;甘油磷脂代谢;癌症的胆碱代谢	258.108	4.638564523223033	5.468499301615367	4.458938065428586	5.088945017389625	4.956750483837803	4.516725429474877	5.1969306408724965	4.962940971873191	4.965198499580722	5.137554797992248	4.970995218806527	5.186490839074733	5.175986598509957	4.788084140713452	4.361423701130391	5.407427348592363	5.044729931514752	5.083759613527412	5.095997635584621	5.138349136632655	4.714613956934727	4.7814846018637045	5.058690562530068	5.031102855944214	5.074508433449201	5.031068219336006	4.756544591714551	5.505510116892136	5.669741511495262	5.375408977766083	5.048072684589823	5.139653131865973	4.846803945834706	5.394444706575748	5.1670133799520075	4.616321719837663	5.162390400694519	5.1132040981110825	5.043303774213934	5.0330832599019715
pos_907	Serylarginine	metab_906	0.64985	-	261.144	4.329547412873998	5.19444529465619	4.634593215493631	4.761299866676838	4.883944573973049	4.642104748528012	3.9039862814591655	4.129130493405336	2.7232188595374818	2.9221141464985463	4.315332344339712	4.000349442441271	3.900376774714723	4.888601268205095	2.8430385327141585	5.378609130580001	4.037632506421411	2.9159132108219863	4.117864762384522	4.488235508313072	4.143473713561867	2.7954251734188604	4.785244825234162	4.7149818730044055	4.494232214002087	3.9033942501881422	5.060356544031427	4.8600884396998785	4.789623212655791	5.009938187268743	4.568591948566853	4.0412683613772655	4.750283006661957	5.0775762849820145	4.075360069992505	4.232494163281879	4.699104465096667	4.680255548263929	4.463722772466665	4.528360221425049
pos_922	Integerrimine	metab_921	0.64985	-	358.161	4.983366412945808	5.174557190733328	5.1172441400845345	4.707512422261528	4.882094696937559	5.397549151449332	4.847914534373574	5.79503986672254	4.066634269060482	4.886311974175493	5.776684495228744	4.919398333528423	4.892701311349812	5.348123631787988	5.554059104767785	4.502429288569744	4.907287602604122	4.884672308163598	4.068556965286413	5.152696538899673	5.049962963176369	4.492460407322636	4.910767464758986	5.138059889049622	4.772732055616529	4.1068918127045695	5.358890648452428	5.16011773667642	5.182923049228265	5.588673863432652	5.1135082693188405	4.881229357551477	4.751377072220917	5.423135488587566	3.981598750152957	4.5420118739624025	5.020482777373613	5.041297416843432	5.055559775020488	5.069685253116893
pos_923	Asp Lys Ile	metab_922	0.64985	-	375.223	4.8726970878116695	4.38267575469863	4.790937469237855	4.1884710183406435	5.408343086614681	5.08668682903469	5.744292707538054	4.926815663709914	5.384245388511301	5.15646075230858	5.3730595771139065	4.999599198335613	5.270203145595199	5.083133734825705	4.901438708470739	4.293707082290513	5.325243925050587	5.645986380713397	5.3193637740819275	5.700154667558977	5.055788054626145	5.004476608109654	5.206939025632748	4.049712758838249	5.0669513904230055	3.9398565678773134	4.117935584781068	3.944937775401829	5.32617611746536	4.633796385126675	4.922164350282453	5.657475379745157	5.2997791609331255	4.3910754765888536	5.211259363391191	3.954700420743466	5.218166205753659	5.159584247828689	5.082330887620131	5.2054796791787865
pos_928	N-[2-(2,3-Dihydroindol-1-Yl)-2-Pyridin-3-Ylethyl]-N'-(2-Nitrophenyl)Oxamide	metab_927	0.64985	-	432.171	5.411831504941717	5.340000709932662	6.099177712675665	4.040375329517263	4.588243293934576	4.507240359674205	5.443151529231648	6.644423600549728	6.3409505098166745	5.9455557426966275	5.88731368760206	6.355569718823782	6.056009943778384	5.814681329414183	4.150034953796046	4.429770531595005	5.750521888701504	5.831432567545277	5.876453350729087	5.816734682860553	5.887390494611196	6.792412144960897	6.365389367816821	5.5287981579436405	5.173927990982273	5.44694440106399	4.3463726967976335	5.56360826206848	6.085920884006662	4.96810085303394	5.51554615121454	5.7367186572535855	5.516088843456797	4.166757529789453	5.520807706928762	4.918575459905446	5.966181808390398	5.985188896251084	6.018231862972704	5.972133284372211
pos_944	2-Pyrimidine Acetic Acid	metab_943	0.655117	-	139.05	5.146643071644952	4.502057216225928	4.8121984077309765	4.710849709976074	4.796366131437616	4.550744305056008	4.910437213225274	4.4469302694324275	4.911606092701008	5.215182237188928	4.403001302726625	5.239182255301016	5.36238904163438	4.983388272193362	5.229673557670232	4.530343934503015	5.060379625675607	5.236598539823882	4.843757534930551	4.572560585306267	4.978867022523379	4.675474563516748	4.821856463061329	4.874933609014678	4.857954788411727	4.715393433905376	4.411502205765799	4.881927894384424	4.261349899488283	4.679324522968587	4.8828309776935725	5.126809037980445	5.2923280491814415	4.629617780018991	5.106077331499481	5.5464628484190035	4.952913210359512	4.902012276127792	4.929431962353754	4.959650913553981
pos_945	4-(Aminomethyl)-1-Methylpiperidin-4-Ol	metab_944	0.655117	-	145.133	5.68694054715052	6.620273258998947	5.6575790619336175	4.287972381304169	5.932132574413386	4.996862425192125	5.859931731539607	5.934657361775857	5.674098624101461	5.1933306742461305	5.776048381609117	6.068339202969876	4.568819209534678	5.2499510686762685	5.970817074664093	5.915990599618652	6.000240786618615	5.2200050898820844	5.885482136016487	5.542832233799076	5.6679274842730285	5.336936568847863	4.955181595350664	5.3572665448608685	6.217891368017223	6.052026488639196	5.2676479472182915	6.428054236031227	4.548168476920543	5.18831454695476	6.519676963863341	6.138757663336698	6.087104535886412	3.211897682474357	4.8849223742001415	5.483665934665135	5.878780818662813	5.860301792053711	5.867712280313745	5.870275344291017
pos_947	Guanine	metab_946	0.655117	代谢途径;核苷酸代谢;嘌呤代谢	152.056	3.5332708039871124	4.5193973476523	3.2718470111504114	3.6242571050787014	4.326847444722253	3.950721970906133	4.722130479418191	3.3071360906232585	4.846537263084986	3.5425754664028166	4.210749171497345	5.19762658741212	5.259220407758318	4.156078793148471	3.9654769963987166	3.956581235168623	5.266931001447823	4.17782227943447	5.226467350232498	4.763030185332185	4.694216377746498	4.435531154688488	4.933511734665276	4.641293114203872	4.9645655511796365	4.481444053970028	3.3145842502853267	4.931940075165918	4.870769276545087	3.2842840495425802	4.604807028275431	4.742744365611452	4.073718119299493	3.3487683518346008	5.4715348605007685	5.4510978957615865	4.725534356457059	4.675745031606226	4.71674221019285	4.702168982142396
pos_948	N,N'-Methylenebisacrylamide	metab_947	0.655117	-	155.081	4.716819095442071	4.876715043313753	4.552390897746978	5.276827639608412	5.3776780236783255	5.308240242201476	3.9756773922761344	5.774879100765481	3.2356290723064336	4.505139615903972	4.6206620744737235	4.696532703784994	4.515600714919388	4.92610628507859	5.070930901326841	4.6083401834907045	4.026010748405459	4.6412264257180285	3.4374343949864565	4.747363361575885	4.983616880021078	4.708726777642509	4.77952535879019	5.18559452621413	3.9057796473064488	3.146247165579692	5.362712986250343	5.428647679074429	4.423331748368222	5.4627915752111775	4.846894663796003	3.9407644993194944	4.401846889680893	5.259384325976419	4.134803788089374	3.2604723738958987	5.033051377623808	5.011674873089032	5.063184850546841	5.044014969152707
pos_951	Oxaceprol	metab_950	0.655117	代谢途径;D-氨基酸代谢;精氨酸和脯氨酸代谢;ABC转运器	174.076	5.141604666064486	5.6710341386011685	4.800110811277738	4.8239335776891	5.339743891209769	5.711236599782011	4.995033221897777	5.25296742144328	4.44996482733686	5.025053073947205	4.828898353007201	4.911946978212852	5.513649383476003	5.302907958681008	4.8985404786912214	4.833159836710774	5.18692129787285	4.62281275133193	5.081016416186866	5.05196322836933	5.065314028138522	4.911346933115062	5.240784989897227	5.300077383336567	4.910571133384878	4.4107586106028975	5.161902849477454	5.4105583911602935	4.887423110765421	5.797843242810678	5.811956244927843	5.1979549183020985	5.544690926037171	4.853370975595457	4.933796070126352	5.261959233921983	5.25265355193058	5.280375553579837	5.224567563588104	5.196088160604822
pos_955	Castanospermine	metab_954	0.655117	-	190.107	4.588699358043511	5.143578836931597	4.802439647346827	4.972347748328292	4.665423163701061	5.013658297085925	4.633496110481351	4.8139692211789695	3.89321152518732	4.579786676869934	4.584918649024481	4.702462511517028	4.680769387292849	5.161137997055793	4.514799473887404	5.23315099042113	4.923208271680856	4.382965043505952	4.607747574246166	4.668484415538853	4.468656452745306	4.6350261017273615	4.4693428215520665	4.647067615274661	4.225065667480067	4.597035035485584	4.717265963856793	4.643967153717671	4.450190187929223	4.999869196897333	4.762293908597774	4.626802469224072	4.7104221938599435	5.520951972033035	4.527430841572526	4.671857844982479	4.845023845843798	4.7534568699680975	4.78230254376869	4.797932477518311
pos_957	6-Isopropoxynicotinic Acid	metab_956	0.655117	-	199.107	4.845561087425733	4.776689897886564	5.052286737884193	4.710885631852023	4.947697518902568	4.8606451052675865	5.09287890088926	5.198456365938072	3.779488835630456	4.672493225059603	4.993555030397713	4.821172603440956	4.9554453039169255	5.337625622781904	4.111073019135065	5.130886866400365	5.2986724963513065	4.81650835940015	4.753079083462958	5.161837612306922	4.786304516098126	5.080328322143958	4.991475088846132	4.830328040100548	4.555441583270026	3.205237764604887	5.3161139819637055	4.837390312481658	5.045995506005776	5.176400954903042	4.9743274805993085	5.0173949128299205	4.943572371471607	5.989793898966926	4.5743255847481725	4.959181791126799	5.118828107822266	5.123489144321115	5.063415763430731	5.019227237949508
pos_960	O-Acetylcarnitinium	metab_959	0.655117	-	204.123	4.328570497891493	3.6345191474721767	4.369083191186785	4.5930525827165285	3.4150800879399568	4.883155063044934	4.617394598197482	4.0295187991395025	6.349425032776628	4.862278559176861	4.481591474591006	5.370366724389164	4.562316457752507	4.406896655476325	4.619638778839732	5.166010688351187	4.765163675395442	4.665361322559749	5.594964306469085	4.015740206044157	4.503308353737945	3.6924480102127246	3.5950113178129266	3.2409136020623874	4.744212559761082	5.201120585179159	4.519304491913217	4.662888015739707	5.588938397045807	4.650637394698045	4.588389263162254	4.295352076948187	4.819227279566673	5.19734142121099	5.557910064455715	4.2957652298938624	5.0465045101966695	5.020299827554112	5.070216227042287	5.0264609286365465
pos_974	Lys-Ile	metab_973	0.655117	-	260.196	4.617925026313213	3.287116503272973	3.6406088842488256	3.718533562012949	4.986884540343033	4.921229916399298	5.9763484981269634	4.882494751737298	5.418302346677097	5.586535909794182	5.234989076679756	5.084226577205318	5.041914120083511	5.081397172568822	4.408194040641412	4.523685454747587	5.4266678300582045	5.402747937251898	5.1055278754048965	5.385752415196373	5.099597874962437	5.535371106364253	5.512969200262308	4.227611777011004	4.696043338387113	3.1204066057430007	5.038884812316153	4.470597434468898	5.555045631254036	4.002365481347322	4.925638040758656	5.489886411529797	5.117778718558228	4.291078650892504	5.147296042530752	3.2346274139076683	5.133496067391583	5.164736318522412	5.157566860850271	5.143900442215417
pos_982	Ala-Val-Lys	metab_981	0.655117	-	317.218	4.6416488610467335	4.023710073132909	4.148582283417535	3.676185409612876	4.810727494871284	4.797075916854082	5.913835765050568	4.117443521145248	5.221894094683246	5.204215754610297	5.2872233255392	4.653620875506042	5.14601193269688	5.1411072967775135	3.7622976041098704	3.881833632702077	5.295475175386173	5.2673993021716585	5.426009384864051	5.4311716715205085	4.860853742922481	5.264403527341323	5.349339041767976	3.762158730140168	4.59275589026804	3.5528864463866348	4.455445994757703	3.6958760340085752	5.214186440561899	4.245806828728931	4.130149574829886	5.510409532922028	5.269564134999299	4.344629303275991	5.421471745016868	3.6671552858981498	4.819102758289191	5.058067327107318	5.049144175812944	5.08149127528664
pos_1007	(8Ar)-2-Methyl-7-(2-Pyrazinylcarbonyl)Hexahydroimidazo[1,5-A]Pyrazin-3(2H)-One	metab_1006	0.66045	-	262.128	4.161488777575534	3.5829163480955617	4.095166080926152	4.319693192824061	2.084746578773472	4.194754031533797	5.173211861954157	2.2571058310188734	5.136895726085153	4.490904787682768	5.507493407988323	5.07768977342194	1.5264057399466398	2.56898923744174	4.725438855940116	5.145316028962528	4.29899423071575	5.28522759140278	5.26724056398371	5.93582354792814	4.32504588061665	4.945934357610115	2.382871302202126	4.053557291071232	4.500546535476043	4.8064734517165855	2.8452915698970247	4.364311888310929	5.269108639665302	4.183354567378587	3.425258555096627	3.6636873835981723	1.5606458714708438	5.631043287231411	5.096275270318178	4.3145990912792005	4.946549676588044	4.832899067708135	4.9351454876546335	4.868893082871308
pos_1065	Urocanic Acid	metab_1064	0.7032	代谢途径;组氨酸代谢	139.05	5.05065117981492	4.422751891302032	4.797796531421579	4.674163203248616	4.690297958472478	4.588654576397336	4.858101600605576	4.48268921512613	5.0003853401407214	5.262082588479587	4.411877290155501	5.25009280203448	5.270428859609185	4.923273499235617	5.161416262161273	4.481404459672596	5.140323248433911	5.3248970444346835	4.99269235264285	4.487252425322301	4.931663273808437	4.715532371345287	4.8201546074225465	4.79337195300324	4.779673904457762	4.686481240816401	4.35553840771668	4.831984509985562	4.3109349765236695	4.65238906577808	4.8424508249374325	5.16569902000396	5.2425057637887615	4.555978966408643	5.133863032898483	5.421271917394205	4.91780721494725	4.917354535002302	4.94568766888648	4.92512350531842
pos_1107	2-O-(4-O-Methyl-A-D-Glucopyranuronosyl)-D-Xylose	metab_1106	0.7084666666670001	-	345.07883658800006	4.677314592488423	3.3690524740526646	5.179451484847549	3.4593536202821573	4.293500079837869	3.990986630876277	4.03033546614075	3.747691398570984	3.6487142047015526	4.914112366199993	3.647268086414002	4.521070273681258	4.6766351004463225	3.1422086935681133	5.2430145798654815	4.113952155033571	5.359166221423637	4.496586890752816	5.6582979279195325	3.2497771338797463	5.8518183487877	5.505492680370732	5.036065145168488	5.143114716680099	4.698480141905645	4.559010666108044	3.2030076295637433	5.511588926955877	3.540371523076145	3.412460935350266	3.9767374236277218	4.579789429727653	4.8354583280306365	3.488786869839864	4.998045404393081	4.56750055894825	4.8787432645360935	4.897809737365458	4.910760423880557	4.833766838972051
pos_1109	2-[1-(2-Oxo-2-{[3-(Trifluoromethyl)Benzyl]Amino}Ethyl)Cyclohexyl]Acetic Acid	metab_1108	0.7084666666670001	-	358.16036027300004	4.066837961289916	4.364977714917004	4.227958518385488	4.152726808807279	3.0547986409567307	4.671719014313477	3.947664301569864	5.55904856279687	3.4340047149676822	4.522181561302576	4.744117644939227	3.6914261458143662	4.434748418930695	4.837397218628593	5.219212840177592	3.0950303246885116	4.1007754594881565	4.477191874596008	3.397265093075148	4.1921161277785215	4.236886460437342	4.98329526376849	4.330044251554572	4.610359672372357	3.342057395273624	2.8414440513929327	4.862276940898652	3.651453035998084	4.646333559629438	5.0730749146600616	4.521877010601634	4.069841554787042	4.218077134490391	5.078436729437455	3.0172425912070326	2.9555962276174315	4.575697781468358	4.39385986404582	4.3851090009025775	4.564741913723122
pos_1128	Alpha-L-Arabinofuranose	metab_1127	0.71915	-	214.068	4.887031600381661	5.460539412307892	4.415628678279887	5.408115404668496	5.0691210758958425	4.948655256762208	4.947442117980169	4.6684313840599945	4.495864325527396	4.5581971241895225	4.909102751983436	4.259466583993101	5.020678581647408	5.393984241868774	4.4698282276103205	5.4834961623458085	5.01591009519655	4.804734688182148	3.813412235309391	4.274418261990837	4.917757331290484	4.255418342559526	4.71492641533342	5.172556414445465	4.95694472828315	3.6714029429176365	5.854895149610199	4.97012711481525	4.247005431530878	5.687970584969107	4.740196842878626	3.7883084904654094	5.307337769965642	5.474722635104835	4.9235973309836565	5.103629222264956	5.135510100599394	5.128207931491454	5.114661556097229	5.129984775037292
pos_1141	3-[(2-Methyl-3-Furanyl)Thio]-4-Heptanone	metab_1140	0.7298	-	231.084	4.049203947999674	4.801887367235026	4.4548617712471374	5.239611277041373	3.8075513917309673	4.80313484020154	4.789450640492484	4.102503056109758	6.130518416775949	3.980828854804458	4.354743723380182	4.583447652635651	4.8651037168671305	4.109281114987543	3.1167858408723377	4.897293072341464	4.5042774603748565	3.9631557030699502	4.295987787352718	3.401128972901664	4.431548509322743	4.022044043006895	4.745802201749414	4.171550906769329	4.012967362782128	2.907533810288197	4.864437231773897	4.552738205093841	4.3004447763557545	5.150732227494832	4.154634506359189	3.3306603062152087	4.117745050415033	5.036359051741763	4.3788529055511525	4.471548668985057	4.731658504855835	4.762824530918264	4.800222997353987	4.755035049584113
pos_1180	2-(4-Methyl-1H-Imidazol-2-Yl)Acetic Acid	metab_1179	0.86355	-	141.06559677200002	2.478365706139088	2.533064646597349	5.5837427774385615	3.8905906273978466	3.116140763623265	5.576947600459181	4.3672149523824615	3.0391197457741352	5.009586047575243	5.502697485062226	5.303363616195028	4.8014945270714255	3.8414788178651635	5.335406335911396	5.286879397176143	5.249692809918266	4.987151742536277	5.455478940235848	5.803100132429602	3.4504982872972887	3.651360710775347	4.946750425070544	4.6845746339275784	4.315579945882712	5.196152593819479	4.4876983937315655	2.897066018512011	3.8029063212269567	4.956766559474019	4.614679367711744	2.906244854042724	4.5355373650393025	5.225514071717732	4.4023849685539815	4.854924367033852	5.348084718635125	5.058276991725824	5.082476924961389	5.074241439076737	5.048349820563129
pos_1187	Beta-D-Glucopyranosylurea	metab_1186	0.86885	-	227.06395997200002	4.140018543088143	4.2174505499119705	4.421752255366454	4.579241671296487	4.9343960597637775	4.533825696970784	4.145441057872262	4.059977006341656	3.747896541290456	4.7432189763508505	6.217800536408472	4.931204760055222	5.086468623906813	4.4597132354733375	3.9519190352332063	4.713104253874743	4.3238556825373085	6.256521939072641	4.754414582339344	3.883512116287529	4.073188091072383	3.552244661511688	4.884494268373528	4.8275277812507404	4.334536523042298	4.785082026869025	4.134922128195209	4.753967352853992	5.563331980251094	4.588583389294057	3.898125692721561	3.4108797054559545	4.14453062197614	4.443974735435743	4.238074570979355	4.819758262683499	5.215930806045167	5.210307667578404	5.208338808921663	5.243122572384414
pos_1197	Cycloleucine	metab_1196	0.8848666666670001	-	130.086	5.273621604177387	5.806040409544579	5.997789743501342	5.676242322732962	5.4822902360393035	5.842971599509128	5.377353846821814	5.727964163622582	4.6280086378295975	5.391691132687583	5.20249648105211	4.942741068826374	5.196355755873462	6.1050333454975805	5.2996145819966864	5.628734195742184	5.370881203858249	5.444478654695279	4.8303025622664615	5.5559672684711705	5.1524367085725205	5.489864651519167	5.233679955910551	5.692415366662598	5.202992440460019	4.694991882988012	5.104773670247342	5.3573112894799735	5.129394450086999	6.027748714351588	5.5374882323827315	5.549432970825375	5.444114687137322	4.8681317852740325	5.0628025335228655	5.72151581193146	5.548522223849698	5.554368401412123	5.55745989282907	5.549752551785703
pos_1212	Cycluron	metab_1211	0.8902166666670001	-	216.207	4.950501383116429	4.156958758116259	5.35777430518176	5.699487831338838	4.671518634845074	5.6683674725265565	5.4223801352744125	5.679837732033112	2.575513390881368	2.7742861636741583	2.7527079384811697	4.558714921704204	4.27912544459431	5.484670324932882	4.106371382681662	5.510867572822075	4.070431772262098	4.930220735550077	4.389029223055145	3.468631237289351	5.9678977958870485	4.366251488191785	4.6714279443198095	5.3650540154026665	3.1377680591502166	2.4863376186664943	4.7787830929887845	4.6435975698533	3.848520069373551	5.124482293032316	4.926357335331728	5.3633276149829365	5.023331904088317	5.419092545839669	2.7765780374346565	3.679820111847266	5.146723462483141	5.164488120870035	5.182275672014226	5.2221377336598245
pos_1220	N-A-Acetyl-L-Arginine	metab_1219	0.895567	-	199.119	4.628187850563075	3.068843259956936	4.308322367017268	4.237537420260673	4.504707866350533	4.874596323809463	4.427193982209545	4.216963984756242	2.991540279899577	3.954027982384268	4.410856471146834	3.9166419891745465	4.449867935953903	4.631255987947336	3.4354776558739735	4.532816931885115	4.077235937847922	3.4240653748255245	3.6944343264759456	4.291583546595547	3.9230005723599177	4.256381011048458	3.8549930318548453	3.9986238139433423	3.908438701441601	3.0054437252046124	4.353888252000553	3.870114494519747	4.316474346010419	4.727831226264512	4.13232162990385	3.6299788303655487	3.8797562506554	4.297563247884667	3.9054187664664513	4.551210165489959	4.3293722326792565	4.29608213621673	4.335261783662698	4.3233291364324025
pos_1222	N-Acetyl-L-Arginine	metab_1221	0.895567	-	217.12913675099998	3.2237552956099065	4.855775438815139	4.055582530660618	4.378187701668317	4.843051061557594	4.916342004202121	3.4047287412541505	4.721995424144608	4.1884918399515465	4.3413346548311695	4.074170766093396	3.0666726911128714	3.361878031150975	4.563769860435873	4.715685655554643	3.8712752133164217	3.922837052477063	3.91045819584334	4.758981801668852	0.6743528456413547	3.684335966567145	4.558157024372531	4.125565686094353	4.364359513406513	2.991027041905535	3.942149309702936	4.15429191360674	4.442918797836227	4.2117973389481165	4.695309066614062	4.547715262012705	3.7501730286610413	4.513757790982654	4.2498343693597125	3.6379856730911264	4.397271517668381	4.39590971547471	4.3042540819118695	4.347897115423675	4.3887630266013264
pos_1226	5,7-Megastigmadien-9-Ol Glucoside	metab_1225	0.895567	-	357.224	4.96544288301185	5.455843727270057	5.164613959946533	2.8957332512979983	4.923143272197178	4.667163662784034	4.468245100676217	4.888408587436857	2.8618886680121967	5.3052011418768465	6.019313951557463	5.193539730834545	3.8191744159126175	2.9886565040409403	4.717679940741268	3.0261241719469147	5.341073876989022	5.6053178296297945	5.483749890356015	5.615188898553387	4.254527323214693	4.710714834051564	4.785922509428361	3.4919516879215933	5.351308995422767	4.5465625060079535	3.0494380831514163	3.5202580906728382	5.6413430862505525	3.019150685114095	5.365731824490555	4.620414315415394	5.229121990208611	3.0219860027802734	3.9029565212595294	3.9471897391767183	5.102158459886229	5.136429941691015	5.101985210224097	5.129957581843993
pos_1237	1-Naphthaleneacetic Acid	metab_1236	0.9009166666670001	-	209.055	4.144555790917462	4.058164970967543	3.965543429019318	4.8865865907929456	4.09484300031393	4.645506723385173	4.0935403778656365	3.9170208207866413	3.3537995786340105	3.771282103375248	3.541543118496808	3.9109303619540214	3.88392252946346	4.960000474048788	4.02515258895212	5.015204146324948	3.6705743393527	3.6536602458868206	3.9042888139114815	4.141268561719041	4.259377643572257	3.5241904413694884	3.9580206635105246	3.930499863811154	3.721756399892315	3.050344574862688	4.480974648223176	3.8001800067528833	3.2606233700389224	4.4900740704313264	3.9910159123868754	4.162805928836511	4.49763466693826	4.831011831328332	3.4343371180787616	3.0820885005295744	4.283359776994656	4.333220478095405	4.360898902108125	4.276374638195317
pos_1239	Pro-Asn	metab_1238	0.9009166666670001	-	230.113	4.7223515139684205	4.249831858205205	4.687358237287083	4.189685138646706	4.722367485653208	4.582752424528048	4.990119649516499	4.723626398619956	4.794720746482926	4.749997371622497	4.860334517206948	5.0714824673598935	4.848981244116869	4.681505740430747	4.188758011066219	4.574972926843756	4.841426750934294	4.965027865999381	4.9682029246617185	5.126492754835031	4.632719672853714	4.449193472986684	4.893071121614809	4.448948739522222	4.252603748020944	4.148254551584152	4.248408216171469	4.450884807454415	4.87164065567753	4.561861661308383	4.6968944352912905	5.230856272882592	4.778973470330422	4.81625278731149	4.583943842714015	4.403025753650039	4.786616276601412	4.767394824782314	4.759849522519146	4.805223946484404
pos_1240	Pseudouridine	metab_1239	0.9009166666670001	嘧啶代谢;代谢途径	245.076	4.306071180033554	4.68476349545697	4.208015867682455	5.105865982359139	4.50527831825295	4.829560861118264	4.089506776885441	4.3475582133462485	3.7235489966570174	3.9756409105538233	4.335589431598383	4.443743498952593	3.906644033870952	5.2093007868328085	4.356130778546551	5.273634120844466	3.721499894188193	4.037601045293712	3.9620674463019534	4.3387420638915435	4.47127407256325	3.76681891850286	4.033245345670985	3.991858951438157	4.003292608326671	4.082782455175962	4.6839110864994336	4.039838700171912	3.910288457901895	4.779091872154844	4.179898957960474	4.4142485682083565	4.635942269655409	5.06466847368448	3.4248726887361194	4.102265405209388	4.559771136464504	4.649242640998393	4.6101593188767085	4.619064849598749
pos_1248	Uracil	metab_1247	0.9062333333329999	嘧啶代谢;代谢途径;核苷酸代谢;泛酸和CoA生物合成;β-丙氨酸代谢	113.034	5.869487172878642	5.954148040037483	5.8256908204550335	6.126661952265843	6.027935729732666	6.063019704558996	6.000937210405801	5.9856802367604685	5.418390363430769	5.516361440810647	5.653735844932831	5.565634995661619	5.844157651646108	6.1048566407718265	6.084406868232169	6.319303829169519	5.773900040132692	5.723797100527476	5.596470291250621	6.02603999030955	5.816425606678353	5.4766685678647935	5.737850327314298	5.99407042049909	5.928224655992359	5.875235209911289	5.871195519343963	5.809333282121727	5.294808137296872	6.269264065382293	5.712976800128895	6.2085454131926525	6.240020841397188	6.013798958964852	5.755761368521561	5.864315271912703	5.929147977399809	5.943442949687449	5.945248270570952	5.94210825397962
pos_1263	Gentianose	metab_1262	0.9062333333329999	-	509.14710016099997	5.811503452860925	5.976168316888272	5.025124451669688	5.257089432852494	3.620442584902938	5.755098223933718	5.93708283117558	5.929114380392537	6.069524765834293	6.156663216803107	6.019240945982058	6.147816885705729	4.6948777588805655	3.62320295605302	4.0122865895462905	5.700043847255924	5.499279263935971	5.249269036658181	5.3409494808910045	5.960381346525144	5.435476875638641	4.9098672346018395	5.689575514755366	6.481093033374656	5.100719387237398	4.982559855629551	5.902333520294268	5.392363233025154	5.531347685911231	5.1460399299331305	4.699155258788194	4.764985127496042	4.401540782574299	5.7596653612555375	6.873527970712923	5.6290590008557055	5.8077148895726705	5.8143504382464375	5.7944466504176475	5.793065683424188
pos_1266	2-Aminoheptanedioic Acid	metab_1265	0.9115833333329999	-	176.091	3.899363507921458	4.860061342772694	3.853327719130297	3.9067417729210754	4.165232867428694	4.7970277800721846	4.128602815875311	3.8911964372607857	2.4415508773800965	2.921434862259162	3.5527336148602897	3.7226684011163576	3.7179903534054506	3.955699785809149	4.2061685425958775	3.985801933858916	4.04094908108002	1.5415601473723868	2.8915727370253554	3.845504557012745	3.072703637078215	3.213706616961668	3.5375297515047484	3.707888729736104	3.668953151500329	2.671632837824763	3.928374332583888	4.07142645438958	3.6348343972282726	4.579170456361644	4.628150210481552	3.878088457659244	4.127514821209839	4.157095010248232	3.55000013540052	4.059835941868496	4.119696472569601	4.147855306407291	4.114903972375803	4.16050922744624
pos_1279	2-(Benzylthio)Benzoic Acid	metab_1278	0.91695	-	245.06297052099998	4.596668800426625	3.1408301642228498	4.094296372624517	4.1543944504692805	3.1875809317045523	4.229622732103648	5.0641748897368535	4.233165279188631	4.839328970310187	4.329082047180423	4.6158745715959935	4.825332067715823	4.60954019475701	4.372377001470646	3.651463507765805	3.721068585401409	4.316667274420895	4.467753599530155	4.906910201464883	4.5223769906355376	4.807611074831876	4.493366446003738	5.0245768516100995	4.058656288141298	3.586152664883881	3.92862689642384	3.251143404396522	4.100577368449404	4.69230239339907	4.276727197072426	3.6280609252046623	4.436358340825659	4.323340690640456	3.941890536327184	4.544139727250752	3.644525128727712	4.4533644059631365	4.396163554424828	4.439434540660852	4.429160131287167
pos_1280	(3E,5E)-2-(4-Methoxy-4-Oxobutyl)Nona-3,5-Dienoic Acid	metab_1279	0.91695	-	277.139	4.109092792088439	4.663863084859597	4.572297901558724	4.551606357322837	4.830893951322612	4.351290341321556	4.469343436259667	4.537370928992331	3.51188015499718	4.568910087828487	4.410037428136005	4.3217938240351685	4.16234373462782	4.724154951640977	4.142053340738562	5.185732222500539	4.443030101580512	4.252509888855231	3.906158355639248	4.177422837067811	4.116108575507057	3.584192007949344	4.168935738043091	4.613272618590322	4.573096708418461	4.120356543545095	4.739609354571787	4.7546064996213495	4.881082220970667	5.029732643866418	4.667680306688125	4.37799683628057	4.600108665996533	5.0008100452565625	4.0812866237715175	4.6890114125593865	4.591988776321466	4.615934919087791	4.655816132844475	4.6270646155159945
pos_1284	Isonicotinic Acid	metab_1283	0.9222833333329999	药物代谢-其它酶	124.039	6.13380519899825	6.2572023971193245	6.229103801524209	6.380154175269418	6.369773495822718	6.589818484916966	6.246762015158536	6.371972948507417	5.5730076622255655	6.231066902068203	5.819386834478467	5.760549597908398	6.0699220257649875	6.59210832800588	6.1396867208585135	6.2867244250505925	6.24363111987362	5.92100366622676	5.97475837826471	6.134752688734747	6.1864621394995805	5.91919033698098	6.128009244947907	6.361026946872059	6.0302558968100985	5.8224650010762415	6.173054422037872	6.194492627169456	5.8763696603675175	6.440633189293811	6.1122737195966215	6.456071159967884	6.449045062436836	5.9802816341672775	6.124989494893766	6.220613190931863	6.215045186926585	6.226449954969683	6.2211646678569625	6.2221225863361775
pos_1300	6-Methyl-7-Nitro-2,3-Dihydro-1,4-Benzodioxine	metab_1299	0.9649333333329999	-	213.08668119799998	4.4081723921965015	4.69401559840156	4.234028439667213	4.262966958325306	4.881430408412784	4.5008925032018166	4.360289643770623	4.217659999769246	4.62582172678943	4.452715927472776	4.624250741235199	4.894578248594227	4.4789161706821785	4.224344330658629	4.554690781519747	4.240231998757654	4.64919896299566	4.807489647247918	4.351680743104727	4.6663118600840905	4.331657188820294	4.09802210216432	4.458668769673522	4.8508624941359315	4.497570544080763	4.823737148292868	4.169556675577093	4.514070281941863	4.476548685277198	4.602481580550161	4.585458058348583	4.6952769225376985	4.561843307521944	4.438439378455431	4.258856211294964	4.9945180431638745	4.598526023520817	4.575624533216619	4.596869132425937	4.5927566008583876
pos_1303	Glu Ala Ala	metab_1302	0.9649333333329999	-	290.134	4.709936054337819	5.05857841421079	4.800821983161698	4.883173463255144	4.911389235695824	5.082895453980983	4.904855232661558	4.974069149058892	4.71410364941744	4.873784140511024	5.0444651519714085	4.940254831129908	4.92891401345536	4.871275508279752	4.820723439961733	5.5291773481505295	5.16679213887118	5.329585134287124	4.65411003656484	5.200475514356002	4.685392802174026	4.869560160680101	4.80617088078716	4.708170240347107	4.9652234172382	3.753059454070568	4.653273528196988	5.035510575185474	5.237478268770611	5.041624319033303	4.6107589304319605	5.120965915089959	4.901957067588978	5.827298611863765	4.749581498242803	4.589348912470629	5.0537155027611975	5.056509502485143	5.071085171169963	5.068522621710602
pos_1314	N-(3-Aminopropyl)Morpholine	metab_1313	0.9756666666670001	-	145.133	6.051719969630411	6.926159470467204	6.2774575842991975	5.013614876160093	6.4968913028151976	5.761716989389198	6.2229470015766735	6.447860886246513	5.921951554094638	5.807668438466452	6.119042622100668	6.4300617619988225	5.0507587857851135	5.87732542145971	6.494466011058548	6.303926577682291	6.484725245016446	5.818176075542746	6.19637628378052	6.002763650458925	6.053688260483497	5.6806442935088075	5.4472814929043745	6.042891521703805	6.630921939702689	6.375086197395139	5.7912343802197945	6.793335250409237	4.942379789140952	5.74532743235312	6.9214312780783676	6.676307337496139	6.5537813194831	4.686354303099491	5.392418013500277	6.099522005193112	6.367818152645955	6.3778422369554555	6.3787037901185775	6.392303321971204
pos_1315	S-Ethyl-L-Cysteine	metab_1314	0.9756666666670001	-	150.058	6.236333434491312	6.6283019664243366	6.01008001475813	6.3643220919498384	6.826873099487172	6.539740790886532	6.465133497547402	6.1977223047489325	6.538568887938267	6.423770637815823	6.509992809210978	6.434006376293841	6.4052274099381075	6.632701943616449	6.6861817720808805	6.451526627496024	6.459884727128261	6.629103520385917	6.353571468888682	6.579230540618325	6.261141102636312	6.074052645510213	6.32444474634366	6.664489169136704	6.567735139471114	6.54050993332201	6.323044541930621	6.319919985656747	6.308239275389536	6.577495651836381	6.423499088930223	6.8127537285145765	6.707650560817827	6.620361155555187	6.377813607277759	6.497221023948383	6.521967569231817	6.523860932472091	6.527757666998005	6.529962027835442
pos_1317	L-Erythro-4-Hydroxyarginine	metab_1316	0.9756666666670001	-	190.107	4.540271835652193	5.3258661602694914	4.881418952009195	4.853477884436357	4.7187846655450425	4.9826187842722955	4.7172377854657235	5.150408957751285	4.1816483653566	4.716179095605279	4.03551096468807	4.181596466259743	4.276861295983705	5.425891990957687	4.604702519691465	5.398841452575573	5.138933970612733	4.778587699432915	4.517729991770003	4.745976252899512	4.3668471303680025	4.740332391401696	4.399820062619169	4.835971668865202	4.698123883896445	3.9595062300905766	4.830032421937354	4.667016833452162	4.497814302263687	5.156634740201696	4.696215016695045	4.889164833799193	4.7534164982230145	5.871191297145949	4.375701448123099	4.948065017389912	4.9925767056625485	4.985414810632009	4.996427343928639	4.971892503114498
pos_1320	2-(2-Thienyl)Chromone	metab_1319	0.9756666666670001	-	261.058	4.835026523650148	2.649638006059457	4.591993227837769	2.60625461044844	2.696321458880411	2.767267739044448	3.2529943118059887	4.7452658156851095	2.858530330658093	4.430447312668954	4.920012439127314	4.581621572877647	3.0420581556601602	4.37190195001913	5.023729958443663	2.736509652626708	4.837878358014083	3.5274399164345698	3.3286377627518706	4.280652262773879	4.522033729107236	4.511451421109509	4.375919417568805	2.6920511758989374	3.0804697059491604	3.5600210094204736	2.75980327923794	5.1886566308049735	3.988613639810519	2.7295424475936123	2.7190175617542645	4.240472540400467	4.5722585488493355	2.7323751990086387	6.048633118888211	2.597245159748826	4.3246766012249065	4.412527063972512	4.373814213498749	4.508200341536893
pos_1330	6-Hydroxyipolamiide	metab_1329	0.981	-	423.147	5.396285763477782	6.7627218760640275	5.522701829316237	4.824627165608447	3.171643509730764	4.737536637109188	3.2518777059398465	5.68535484838242	5.519662877210869	6.209358083651563	5.743319803205278	6.1376820987644924	2.435518020351977	4.704951377796838	2.5443944621674097	2.588679553068898	5.675966920221943	5.908941290027743	6.292782739013807	4.982730587591224	5.256963552192244	6.285149201940872	4.623878466982044	5.181344050224643	7.164432185040113	3.452389655774124	5.693756278551367	6.295497977985449	4.617062681921248	2.581717581873292	5.3826778479429995	6.4931422213561705	6.957712209162108	4.763712715344031	6.969883071995517	5.682384942766693	6.184655793226706	6.187397559609049	6.187296369919324	6.204932035067303
pos_1340	Arg-Val-Ala	metab_1339	1.0184833333299999	-	345.224	3.7262262722089314	4.691485507672484	3.0183223073866965	2.8991112519139755	5.023982149720021	4.2538252315846234	4.298086353970424	3.3774389598035413	4.116304010378418	4.468406449613363	4.860589499345723	4.2146558221583845	4.314833482839181	4.291525898848297	4.30613105230724	3.0295032834963136	4.328620017741058	3.6927843298672127	4.808731420109557	4.8763727374711605	4.0708189438631575	4.515344184981788	4.8915502077197335	4.819060550098716	4.931462861763227	5.435235298346348	3.052817360516253	2.880339694096968	4.795071714703734	3.022529745311638	3.011995097473517	5.259976985084949	4.733086227207107	4.116757364244986	5.12243823385644	4.822843727373778	4.617395439484707	4.646202945729176	4.5466871835730345	4.626573644511967
pos_1353	Butyl-N-(4-Hydroxybutyl)Nitrosamine	metab_1352	1.0451666666700001	-	175.14380514099997	2.5719765902159617	5.3883491040482285	5.587971044964203	3.1666438945090682	5.059121003770568	1.8867295001318245	1.7509959326733096	5.9470916916757375	1.6097144851407552	1.8049698398433844	2.153672783753648	4.804093021668801	2.6016485018458115	4.695838943722551	5.357540280006875	5.47195174017225	5.247952834234061	1.7988593877501566	1.7797201721548646	3.9675374052519294	4.840780655918247	1.6804071062144916	1.7663663776295928	4.2739903905151895	4.6624995300685415	3.132860233779464	4.84583148999214	4.950482123719244	1.80921844747522	5.628199526024732	5.4611040415411045	4.768601239588028	5.523901921164393	1.7666912971666098	1.6943497675165595	4.887445319540488	5.086413813940945	5.080746424969531	5.1016265819267375	5.1098673964461785
pos_1356	N-[4-[4-(4-Methylquinolin-2-Yl)Piperazin-1-Yl]Sulfonylphenyl]Acetamide	metab_1355	1.0451666666700001	-	425.162	1.1014082944894494	6.3192951100574195	1.2153691325421188	1.1119021617206553	1.1958255788512653	3.1439093986863167	1.2028061041174078	4.074030558371891	5.0809654171453875	3.923825444145346	1.2460353263408896	4.398590829347762	1.0906298958928715	1.1984112402590814	1.1919504630933275	1.2336344221179818	1.2579399209367064	1.2605825283829677	4.152751700108541	1.2999687347284057	1.0720547657742057	4.459815374967588	1.2294242009216458	4.031178699458299	5.4268419754597845	3.1540361019396745	4.651287599018827	5.217003017353472	3.380070025253928	1.227065002681072	3.855567828822004	4.914458063449938	5.749952040557702	4.476074771415568	5.306060438168506	4.38919056373918	4.8821569717562285	4.863879575361197	4.845610098248502	4.811354467219991
pos_1359	3-[3-(1,3-Dimethylpyrazol-4-Yl)-1,2,4-Triazol-1-Yl]-5-Methyl-1,2-Oxazole	metab_1358	1.0505	-	262.139	4.365412035803151	4.12639420171835	4.332028560417002	3.6822747648216234	4.766586823202792	4.192117262690078	5.104862148154496	4.713828508755464	4.552433434023583	4.648063431983038	4.634639342601087	3.497480685173695	4.6251092937949645	4.428984040301421	3.4937898488299446	3.413040306991628	4.741707866361999	5.404242989250548	4.555787440040549	4.932972174380018	4.4774353116466985	4.710504375815706	4.66657312479608	3.3685139115697416	4.258240066010426	3.1593102291218615	4.214517570619058	3.464296862665453	4.721333290281624	4.691954858964594	3.6231708641281033	4.824083131838856	4.719722075521294	3.4088998267794968	4.608442574373648	3.2735375641466815	4.482067161183843	4.3737040377539484	4.380099502938851	4.333491309128647
pos_1376	Benzenebutanoic Acid, Alpha-(Acetylamino)-2-Amino-Gamma-Oxo-	metab_1375	1.06115	-	273.084	4.445838060446528	4.406269512381818	4.545661085849467	5.014421772110998	4.615321545965087	4.188632940535601	4.707435425677383	4.8397589118994055	3.2960554507993467	3.6519184307062913	3.975544340408746	3.3337032833098883	4.387533414541201	4.696961573616734	4.78140696774906	5.149907478509001	4.338236627047396	4.168626711909118	4.2802877254915614	4.467360541310263	4.458059888450337	2.5132111924592206	4.043513237988714	3.7388572008208856	4.402291689523143	4.247208655675148	4.3275268794786514	4.186628086197537	2.6440448616935766	5.039877599572159	4.242412750973978	5.14049675170116	5.179842909211357	3.81931368420344	4.396561072673858	4.050603122824943	4.561124825511199	4.5851643424506765	4.569051957846559	4.593111359087709
pos_1378	Theogallin	metab_1377	1.06115	-	362.107	5.641672376103108	5.6654974857107785	4.9757417667033135	3.7422152399655455	2.920389236682261	3.6464265854573923	3.0934788372315896	5.207798158073829	4.47743795573216	5.433711615551099	3.1749088062099986	4.931924950083761	5.067250008339113	5.909046957400878	4.4062843974622545	2.96060862395525	5.545258509801371	5.028969920427564	3.786598238742379	5.3837470637270775	4.611484739399144	4.438466637418892	4.842117500975059	5.4955124276733205	5.8547613464233565	4.211764410738999	2.983919051573233	5.017818326158209	5.242523943862925	3.2592974217706048	5.369526147418262	5.0422127183218	3.795338026993536	3.849268434540766	5.086504706923092	5.240530666170755	5.263724560634122	5.2736061125830345	5.291922577778356	5.252943465837534
pos_1380	N-Acetyl-L-2-Aminoadipate(2-)	metab_1379	1.06645	-	204.08639851599997	6.663004828792633	6.67814593233983	6.029084041901785	5.517196966153732	5.119052241038477	5.57471432996871	5.5339088429869285	6.218574039285313	5.451410995866191	6.494652727745491	5.070216197126321	5.823946851259048	6.144581347135903	6.871883659949383	5.698809163337348	5.5420836455313225	6.540940209456892	6.009788143800358	5.514643063266049	6.3830835640819075	5.845372087074258	5.694126885433649	5.99461540904786	6.557138866520983	6.923385150215697	5.6245288436164165	5.876491963161402	6.127064678229405	6.3710314919184565	5.53380825583068	6.356701745167878	6.195176822997325	5.696427081668135	5.4752386086878415	6.2268308788385855	6.25631707579427	6.250257473587851	6.2477164426812015	6.261089213720981	6.259823939712247
pos_1386	Picolinic Acid N-Oxide	metab_1385	1.0718333333299999	-	140.034	5.0739608874322535	4.815907549714123	4.813471534500517	4.589781735297189	4.102450571218955	4.611196472970302	4.66682820733545	5.379135017706803	3.958859886713212	4.972170070447246	4.779929112128953	4.779395697520562	4.6074672900599625	5.034541653553993	5.14460958309172	3.873085665690988	5.126215504964458	5.018141715741444	4.419628166206351	4.662492461065227	5.068524635495133	4.821403944632928	4.903576080749627	4.636680881885977	5.3923230590042825	4.221023332448747	4.5413333588951055	5.08552623847612	4.462703238524068	5.117335590185778	4.78333990175001	4.785917598587475	4.765063165068068	4.54711673674276	4.660757411011041	4.7568379646492085	4.855340369071104	4.878265294547905	4.866812192212478	4.868297284046767
pos_1408	Lactulose	metab_1407	1.08247	-	397.134	3.0214629987424875	2.482225353439228	3.217531352170764	4.241178951104812	4.400753240660969	3.913726272074493	2.5362916203333032	3.6071174748501234	3.8527772629065216	4.619722366450747	4.623634718452549	4.539599479701616	3.6804007176745115	3.4451603207249164	2.5247343266997864	3.773137375558472	4.783021152022377	2.5975047313766377	4.7889309876133215	3.779535410482824	2.3956990638757385	4.2798839445755466	2.564553296361076	3.509139095081919	4.975963937823949	3.9934468467669135	5.746939566922616	3.5051342862678005	4.628713865055746	3.899428124475952	2.5515371809568608	3.7130024620011066	4.382772442589669	3.278815623444383	4.860030347023517	2.754831651497476	4.450071015050197	4.390953661385612	4.541225548891429	4.524064676478613
pos_1412	N-(2-Hydroxypropyl)Valine	metab_1411	1.08778	-	176.128	3.37373181134498	4.365494334418528	3.6211752201640577	4.914495765065225	3.756605168311149	4.4538099014851005	3.435418148831949	2.8550648934291107	0.9990501675678112	3.5255859767122484	2.7988946154446954	2.551161117268556	3.2939684790863546	3.799620984282005	1.10842980884574	4.837138780798963	2.8586105886199333	1.1761361823898735	3.0675031050966863	3.0600650643215888	3.2353131278768266	1.0646530895703838	3.692898620986666	4.080847232748975	1.0717820626408754	0.9194514878286948	4.649276353494064	4.199387652913479	1.6083182712983202	3.857101995719432	3.625742332711312	2.837018332067024	3.906249495721192	6.146460108355787	1.077679761145855	3.7605751777471856	4.5070546629967545	4.547848775756524	4.564935749104986	4.536453011994404
pos_1414	Gly Pro Ala	metab_1413	1.08778	-	244.12891422200002	4.062822860000187	3.5098208060143614	4.214825929176532	4.521228923829199	4.59337930622408	4.141763027099929	4.375593523987493	5.217464013527277	3.746963435592172	4.3371163947199785	4.515440781854095	4.416735831106277	4.25391901280675	4.3387077367703935	3.892163375359425	5.2673320454592965	4.37417767097222	4.727650926184662	4.196354235018419	5.005488638888751	4.037431298102442	4.8166859501703865	4.317797117691055	4.507448724333913	3.9947710239084686	3.5390180035382657	4.885828916998111	4.523792596950134	4.730553245952377	4.854360797042385	4.520278563203954	4.39188067435961	4.306700675515187	4.874983166688085	4.227421998787465	4.28460123408353	4.607797268782129	4.578010365980124	4.612662471806802	4.623143495492627
pos_1417	L-Trans-5-Hydroxy-2-Piperidinecarboxylic Acid	metab_1416	1.09333	-	146.081	3.4042515089466536	3.5805933312921505	4.1979022243492174	4.1078974750981	4.022970595724811	4.1036540438866265	4.14489695453663	3.7222231059131983	4.022231433204707	4.374592460011467	4.232818771306507	3.9857150427058574	4.125858878129261	3.8246203824857545	4.150290341739198	3.449656202462308	3.996909848508418	4.205657303636157	4.294258555763919	4.356678665986315	3.884222679437897	4.1951838703327615	4.120425405973118	4.166079045998767	4.115212266799676	3.5485128859065007	3.941121322357738	3.819485580851181	4.3478942940378325	3.8698527202331823	4.031440821289394	4.617355182617648	4.2872708281731216	4.101798621400151	4.279111480312256	4.853641229103447	4.0097716809036426	4.104661810614009	4.111391109142359	4.198168418972826
pos_1431	N-Acetylmuramate	metab_1430	1.09868	代谢途径;氨基糖和核苷酸糖代谢;磷酸转移酶系统;核苷酸糖的生物合成	294.118	4.501922794342036	2.978336093599435	4.643718905679101	4.966985539094535	1.5273534730703224	4.340510019454884	4.6635532891205695	4.95748196090274	1.4074421000566593	2.9136741009314835	2.4218499152351702	3.270385529885944	3.011455863359136	4.6971395381621885	3.2978204261378368	5.145206928431817	2.437699204246931	1.5942903776214803	3.0008245914656944	4.992952585763724	4.044604952383462	1.4771590847265568	4.15909304769578	4.358598701054508	3.2474528985271927	2.89633294649607	4.354900695497827	2.1654810755653373	3.546968116664793	5.28985423101177	2.462372611468556	5.180127553522376	4.402931225132072	4.653028643832604	1.4909271411179137	4.5243989153624335	4.4667933004414015	4.450116673421329	4.450159026427077	4.511016805570344
pos_1432	(5Z)-(15S)-11-Alpha-Hydroxy-9,15-Dioxoprosta-13-Enoate	metab_1431	1.09868	-	404.214	3.8907655534480217	4.4526735359669285	3.3957406985100307	4.609721831507339	3.754652876799944	1.1263614734475569	1.0678271709296607	3.3681064092311312	0.9491724894034294	3.3477479987586785	1.1100520728900616	3.498694997070429	0.9587603007568688	3.3928900787813197	1.0572394397750973	3.4608650468205373	4.2676107336766425	1.1242826919053202	1.1063194188891408	3.326075973913265	1.1331238665244747	1.013949259404808	1.0938153571322111	3.5658359775522186	4.52761208245708	3.7266439598748495	4.767523440809104	5.169768612301199	5.191066555462935	4.90795998272506	4.42399497433559	3.4273645164960853	1.0609125672120292	4.505088490000939	1.0268260498443005	1.1178296322921393	4.129323343496177	4.233187239271722	4.1806646777018965	4.114896346788175
pos_1442	Phenethylamine Glucuronide	metab_1441	1.10397	代谢途径;戊糖和葡萄糖醛酸相互转化;胆汁分泌;抗坏血酸和醛酸代谢;辅助因子的生物合成	330.155	3.805402693221928	3.6770048021308814	4.417008504554194	2.053056685620939	2.1426034658018125	4.737967175099434	4.057087112358741	3.921488881430623	4.117583235186216	4.110219651512339	4.4321640774114925	3.7524307939614636	4.0294819502951045	4.509589766588602	3.547570528913973	4.2053274072181885	4.858846838582493	3.981180407607632	3.623340227634273	4.35635006054207	3.690097480450549	3.884139463218111	4.088906747105524	3.829473582270409	4.313408906779677	1.930988041212779	3.7075822055363967	3.620346384735484	4.388293200403536	4.392296857864785	2.1651845802401994	4.185484736878381	3.892843736202058	3.5407150911226166	3.905019646050672	3.107033486116717	4.341930019540971	4.190938972942656	4.1114684697743815	4.1454902558443125
pos_1448	Noradrenaline	metab_1447	1.1093	代谢途径;化学致癌作用-受体激活;间隙连接;产热;群体感应;心肌细胞的肾上腺素能信号传导;血管平滑肌收缩;双组分系统;cAMP信号通路;神经活性配体-受体相互作用;脂肪细胞脂解的调控;肾素分泌;酪氨酸代谢;味觉转导;唾液分泌;突触小泡循环	170.08089509200002	4.307914773996293	3.5005845989153626	3.8831703186719726	4.503119287863887	4.141140480323879	4.384628944805644	4.0096611721229065	4.312467493023124	2.909048097591407	5.54945257340396	4.7102041585931085	4.197595751122105	3.8235326726885415	3.932400521701333	4.3922079272652175	5.337340989056938	4.220768265341317	4.11133719159809	3.5111714786094015	3.977091676210819	4.267175559139736	3.7110296856406033	4.028108454016598	4.052098584367348	3.1494773675462144	2.8197309021069987	4.0656846985629835	4.097964980616358	3.8455739676852514	4.277478567519529	4.248944743333759	3.700145713276058	4.282439566316822	4.260077201000255	4.0483594278288	4.191141771994214	4.423512590555923	4.4164871162235375	4.450529251107372	4.416533938227678
pos_1458	Hydroxyprolyl-Arginine	metab_1457	1.11465	-	270.156	4.511049283625047	3.649610493998875	2.9977987857053052	2.8868154578157244	3.550745576858123	3.6724747409040033	4.566764685531746	3.967809853861082	4.56900844532993	5.415732877643919	4.494491970687879	4.265228390643552	3.557294524005248	3.7663451408448214	4.975863845789979	3.468760101054176	4.834372697694973	4.775579056610899	4.354464602128986	4.615473061426862	4.031272718511455	3.9646341555566975	5.437215626191176	3.923998980839008	3.732520053821071	4.098892342531529	3.040516870977385	4.2445850931620015	4.845115205487286	3.8768686897262494	3.1559027607250183	4.3166394959276335	3.583684744859891	3.4777751200867515	4.6009631094345576	3.678001659772677	4.3608172939701735	4.3926917540281405	4.3856521863978735	4.355500888561181
pos_1464	Gamma-Glutamyl-Beta-Aminopropiononitrile	metab_1463	1.11995	氰基氨基酸代谢	200.103	5.029910363241561	4.912039467384787	4.92380326412588	4.851365320225487	4.904254246021786	5.193376101974916	4.833203427979402	5.2321302196403465	4.153076018313206	5.033665385565493	5.416281627235502	5.035973212947867	4.95119780778982	5.473554245349484	4.663197470341839	5.308521544548966	5.650171569585773	4.930975075483413	4.2058966634206065	5.062519892013679	4.680722801737949	4.61862867570718	4.685205288986742	5.227414460525256	4.824045215322755	3.7059574694781854	5.5965554404463465	5.057107196756852	4.9852301878700285	5.462703266318421	5.341845092736842	4.870133394386581	4.618556910170871	6.4435683678762175	4.483505563637402	5.045932824668423	5.345193237463574	5.362915467803103	5.3660998484907045	5.3687646402445495
pos_1465	Thr-Pro	metab_1464	1.11995	-	217.11801428299998	6.294302437592077	5.5571213803463495	5.908645548276002	5.693785976048185	5.545400735470421	6.345896378899702	6.434111076628133	5.7097286798058855	6.216505572996067	6.380686468948066	6.1524357389015565	6.461676094274372	6.4165991612626145	6.461888050357333	5.885919851270724	5.62069088119692	6.464122822437973	6.721291077083262	6.295895864518322	6.542450909182497	6.423314719711511	5.921016591464452	6.3273895506862425	5.8678262208777285	6.300869753352824	5.617308051186558	6.1553361168827925	5.758335005087695	6.068192086962414	5.626986581959169	6.186610491204883	6.693195150765368	6.602215164716508	6.141769309531168	6.411412789203526	5.719582117634152	6.288632869579931	6.285043175675572	6.296545748063402	6.293943616996333
pos_1478	2-Acetamido-5-Oxo-5-(2-Phenylethylamino)Pentanoic Acid	metab_1477	1.1306166666700002	-	310.17583972799997	4.5922520165384055	4.279172904756088	4.097714829078245	3.501847868589569	4.996608242307898	4.771342475215486	5.353415488432573	4.596225683526321	4.441996554913921	5.141820368214137	5.0744696071108635	4.585674232622177	4.396881109144063	4.8256571030113085	4.3336277609827425	3.0531508171880932	4.9927070691989615	4.925727453978396	5.138542210265631	5.286812256793644	4.554930235963167	5.054416261428886	5.219595006190219	4.5872427313464526	4.698053020805434	4.551438002507589	4.332616240617679	4.260664410032069	5.291670450760917	4.372480302583154	3.9483573197269557	5.2436067260792685	4.851674899707484	4.495958331706565	4.962019656413569	4.0062021245251245	4.882953760556709	4.895135620909005	4.927721541859724	4.906018873605963
pos_1484	Glu-Ile-Lys	metab_1483	1.1359666666700001	-	389.239	3.414039767142884	3.1740020265309714	3.5219630698009667	3.130546801740376	4.8538152914125945	4.8424893875955695	5.324876098049283	4.505631016968235	5.101191104304541	5.085543349771993	5.324474653663093	4.955698872467017	4.639906415829876	4.882571893312044	4.811632565657403	3.2714436622568246	5.195558424374342	5.577603681178743	5.057388639409939	4.924803013009879	3.8394103160383417	4.839140898313171	4.200432481211164	4.3290818574829135	5.0901888943266815	3.5055139958254533	3.8626215273821187	3.8262562569933967	5.149579839669495	3.254021347644875	4.999272918533067	5.126554060092853	4.773118465139415	4.351203511870241	5.0817396637917245	3.121521511478839	5.0071076217313015	4.9966211235688025	4.991624075198897	5.013524962635652
pos_1487	L-Saccharopine	metab_1486	1.14132	代谢途径;赖氨酸降解;次级代谢产物的生物合成;赖氨酸生物合成;氨基酸生物合成	259.129	5.1442174302038834	5.7525537980766615	5.459835176415459	4.815893526156518	5.715709723367598	4.986772980960604	5.327027334317124	5.1997603897391445	4.725147414006946	5.2973133154194585	5.253721408395051	5.170161995914045	5.055914407400636	5.457209873219247	4.97185726636569	5.170223284621051	5.311140975748219	4.814539588865571	5.013972197234384	5.111107559566689	4.9579567242533775	4.562292684952562	4.9166080746590195	5.113679672039236	5.021900286630084	4.791982520339665	4.9468081979732	5.077628554295727	5.039300918285078	5.3197334319603895	5.269790846754408	4.925830482697021	5.304907204605122	5.549135505104129	4.815588794396065	6.644106112965701	5.412167322080723	5.413375288393952	5.397100209523585	5.410287911572987
pos_1488	4-Ethyl-N-[(3-Fluorophenyl)Methyl]-3-Oxopyrido[2,3-B]Pyrazine-2-Carboxamide	metab_1487	1.14132	-	327.128	4.499239805594547	6.2125114003069015	5.366338767819825	4.807354414407072	3.335773943747732	4.21495604926391	4.666057801022167	4.948347406986012	4.662701229534608	5.0023063687239935	4.896925202685132	4.942321741361454	4.5555822940017405	4.805970123897066	4.701114826804441	4.0570163389284435	5.403036578618433	4.852245326882168	4.581279225144459	5.032925280217851	4.295132227301422	4.145820671612436	4.575043650400861	5.293861988068193	5.205098245373568	3.2886325442298734	6.415734731394366	4.791160212105244	5.467288985225327	4.479383019309477	4.798739453674589	3.615281844658408	4.069482939523853	5.9063577074994384	4.423426510579058	5.103657505404357	5.426474640573784	5.402162675330511	5.4145623679113575	5.39756881420099
pos_1492	N,N-Dimethyl-5-Nitro-6-[3-(Trifluoromethyl)Phenoxy]Pyrimidin-4-Amine	metab_1491	1.14667	-	329.08402410400004	5.5294736900219945	5.085614894711067	5.293480087384708	5.4201884434032825	3.780571423242214	5.784058076381832	4.8166537585627225	5.428499489697778	5.630111862368051	5.890297645121183	5.516002178691924	5.685552247294412	4.753070266744584	4.96783382023438	4.96362308155496	5.833186185923809	5.575840542551202	4.6683803077339645	4.884681784628632	5.2557926908991375	4.990262707443299	5.0030295907355855	5.554282752699367	5.534994568575857	5.226100616474202	5.00961006884542	5.328800759488579	5.382677799805339	5.512537372085232	5.567838187315392	4.986015890013774	4.479343829593477	4.948451944808563	5.440132008008773	5.482780459224105	5.04839239738418	5.423733879839412	5.421151759216103	5.409444647986011	5.416907653941848
pos_1497	(2R)-2-Amino-2-[[(1S)-1-Carboxyethyl]Amino]-4-Methylpentanoic Acid	metab_1496	1.1573833333299999	-	273.144	4.61639327350891	4.8177184085536835	4.404549089815864	4.5993117921652376	3.942627419599354	4.915184012429881	4.786377366480015	5.095630473043559	4.2177464044559985	4.777599465295984	5.097903074285906	4.7937315507863705	4.5069556061944365	4.925108016546608	3.716721888385597	5.138090757186891	5.025596539495355	4.669940588925172	4.433016056297155	4.973763295848472	4.318321304396073	4.410422860233633	4.51987513809343	4.67044708227279	4.796401717954971	3.5129412682506693	4.939965986643533	5.087236252923387	5.487276972444936	5.123792032342078	4.601507737896572	4.6997923374219095	4.543055095800893	5.222848935327722	4.290935036206608	4.7376696476066975	4.916741605959602	4.821466998484353	4.886633122969992	4.911015290691078
pos_1505	Glutarylglycine	metab_1504	1.17335	-	190.071	4.352911506285527	5.012553395213634	4.665409637160332	5.389484134209251	5.170606795969538	5.418449508915455	4.282444854922147	4.568524767718112	4.359555119390238	2.878632158709596	4.866136266492724	4.2905758740291295	4.572902679196204	5.217909356623681	4.605183716751923	5.372200815172117	4.638088967119962	4.74929940125676	5.0063039486994185	3.5173539125973337	4.602228708311189	4.1323932975271855	4.500998165143826	5.202856230518889	4.458310430272823	4.215852239026737	5.197615499791674	4.857816553212759	4.6033835923125395	5.252884988617857	4.946074803652532	4.612347943737112	4.9021088399005786	5.150791827791757	4.2888032664491496	4.6227577508957625	4.921178052829694	4.906169197529096	4.938736477278291	4.929952273066035
pos_1520	Statine	metab_1519	1.2269	-	158.11728500700002	4.0849032980636455	2.3366282552966933	4.366021249410716	3.171165201502656	2.401153684219101	4.570804210288367	4.1624919008327685	4.3266663615880265	2.6178413922050634	2.4579609581522712	5.1599279696131415	3.275353056582313	3.575340272409438	3.965124878699584	3.653382368157666	3.783074262883547	2.823218026610592	4.023035534328248	2.4323893439672704	4.672433362553224	3.916038244982933	3.062715501850417	4.59934032167523	2.9270109971163434	2.9057842998695027	3.043905688852858	3.2545328024321027	4.0266550038833	3.910801170816872	4.281187664921256	3.5664729045579886	3.2732286205933714	4.117890784012333	4.512382370249719	4.097508520145778	4.109575165624018	4.132461992957673	4.159867824802976	4.085906899407012	4.282741528336111
pos_1528	4-Methylcatechol	metab_1527	1.24283	代谢途径;芳香族化合物降解;不同环境中的微生物代谢;萘降解;二甲苯降解;甲苯降解	125.05952284700001	4.512620710501648	0.004544058199824769	0.005305024462769159	0.004113143278233372	5.124222547944637	1.0664861542803856	2.876349959492699	5.252003260253308	0.0038057335989109173	4.442541945084449	0.005715625634123682	4.704974819529436	4.0892389014134976	2.5356682485228976	0.005010178476677002	2.1475058136961755	0.8378162785390529	0.005920632670276307	2.831012094254327	3.991885811530015	2.2107586592823725	1.1683471677469566	4.6272125070939385	2.517360000798736	4.085980571164791	0.0030999316763724864	2.230590333928472	2.114195721510175	2.3496041803375283	3.4473373143344093	2.0316848234819536	4.910236243160959	3.106952390422164	2.198431522690165	3.152011565245961	4.071615676185536	4.1928091639650615	4.1858979415060285	4.242140007257312	4.18371434806589
pos_1551	N-[2-(5-Cyclopropyl-1,2,4-Oxadiazol-3-Yl)Ethyl]-3,3,3-Trifluoropropanamide	metab_1550	1.30683	-	264.095	3.2677325248678204	3.635533465538582	4.0297773143238	3.5474596487227137	2.638599370838957	4.525619963270703	2.6460338166235657	2.694627386606672	2.5147714722368857	3.9926377332191767	3.1665881344420685	4.068179674516362	5.48708700113276	3.8483166186533238	3.095174424726989	3.707504307051531	3.0792111186685265	2.707284117591118	3.154324916481621	3.679031234267221	4.302146895929609	4.4077912522148095	3.8475639892972886	3.8289494452197386	3.658798439504543	2.4256352958154133	3.6015390152445663	3.450554360416453	3.926617323183738	4.278508265027613	3.2195523342776213	2.817056395269384	2.6384839834349	3.8557847994825667	3.9832614614504527	2.6379262024962453	4.125094986157643	4.0777401070562735	4.0693775544101465	4.033669064021194
pos_1555	Lys-Leu	metab_1554	1.3175	-	260.197	5.556266648012726	5.667086049817643	5.259478256076786	4.876231045171116	5.995068524666874	5.825939613736618	6.395090762215557	5.479324667267512	6.212311217671549	6.633976634812846	6.543237848408395	5.793594832564539	5.7984891018274025	6.221862678465879	5.56842888951672	5.1558053558970185	6.333077469094797	6.328831504332259	6.621682336181473	6.452729020758728	5.776175929493085	6.455770520613066	6.48384595692956	5.540281018315867	5.895960070103271	5.490833195157576	5.591059211970801	5.340661870100466	6.492765953059629	5.361376840832003	5.546268130703304	6.43215900521849	6.073857706921363	5.703599478346888	6.260984076935612	5.233856358269609	6.160712091732688	6.1592931592973565	6.169258712136519	6.176367144718203
pos_1558	Ala-Ala-Ala	metab_1557	1.32285	-	214.11850918599998	4.260997149289349	3.6241751901556873	4.069191617305576	3.9945247334107594	4.097147528219799	4.235986197719007	4.45418476915488	4.409298994137107	4.3184626189259685	4.65508661512412	4.65666578250687	4.601131118003075	4.4788669507865775	4.308109395982365	4.149301528509483	4.584251759842196	4.548010696839891	4.453314251187943	3.7136447219456565	4.715802023799743	4.1958537340287805	4.351507738505506	4.4743643631727625	4.201037490044018	4.421737508293932	3.8257496143249576	4.180491071143882	3.94996823795392	4.498558093196005	4.556293053667536	3.8033270145269213	4.6630870035542955	4.48369896696697	5.40566554146703	4.294855734227603	3.981736724125095	4.651049901355815	4.594894406170494	4.665557584562176	4.676852529689969
pos_1573	Asn-Val	metab_1572	1.3763666666699998	-	232.129	5.102188605078445	4.884656785405952	4.652878458905604	4.102008686666983	5.205672832587043	5.084179597177439	5.769086511970869	5.11246057732008	5.700905178054594	5.9831142964810935	5.796160116840966	5.906328494325237	5.626973403059164	5.423767288688357	4.872815676713135	4.371989942779604	5.866604998533249	5.627050261365451	5.574020682346076	5.901666580312183	5.422435613976487	5.645933545831762	5.763304393800943	5.039232548167432	5.594532022210691	4.872191836672264	5.112396600084184	4.678704484832187	5.658972142360024	4.688137307456586	4.831709514260196	5.954391224609287	5.620517536691095	5.084540156902116	5.574069459422833	4.754266575268362	5.546198939823356	5.5312600238188585	5.526961033311415	5.537400765386473
pos_1575	Isophosphamide Mustard	metab_1574	1.38697	药物代谢-细胞色素P450	221.003	5.079926433030222	4.9409778228452925	5.531533407734521	5.631942638425987	3.0798785158472994	5.6513999037255465	5.103822645677678	4.480815585056827	3.803395512067602	3.8114840554067055	4.627593203948554	4.655898645852133	4.734073700347085	5.13810505049434	5.263472721722273	5.186944181250763	4.8104325524009575	4.903119356303157	4.617733157159697	5.256721878906284	4.6757838145096065	4.899415399807687	4.8811656703851884	3.52095656267594	4.725260563213824	4.48997821768875	4.997624361730055	4.754191429745184	3.9470469979754434	4.7244523541307615	4.64080316947995	5.17124085827419	5.293569851363616	4.8676552447536166	4.885573578861334	3.7106258960264373	5.082215177273618	5.079547416124459	5.097474453024413	5.097827371851411
pos_1581	4-Hydroxybenzaldehyde	metab_1580	1.42995	代谢途径;不同环境中的微生物代谢;氨基苯甲酸盐降解;甲苯降解;双酚降解;苯丙素类化合物的生物合成	123.044	5.217007009335523	5.641116784610152	5.121131527110302	5.247708918312738	5.8332108146583455	5.651074567767564	5.365281228970495	5.22647155247489	5.7762195596986246	5.4229230445678285	5.594952649019627	5.5075955546009405	5.440601415277319	5.579634136682227	5.841222845283054	5.450250243246408	5.408687044983712	5.718378349088218	5.637553544686699	5.8440523200828745	5.244953947338847	5.0293420781711236	5.290309597407506	5.656165122398133	5.69866534191161	5.705377550017003	5.309783254422053	5.2730181581745725	5.356154308297513	5.512699162901857	5.418730148842805	5.74278333434813	5.57823810658381	5.666259960022953	5.427398627437706	5.548554566716733	5.5545531220967685	5.562006349838015	5.5710564153438025	5.5623780575025235
pos_1582	Coumarin	metab_1581	1.42995	次级代谢产物的生物合成;各种植物次生代谢产物的生物合成	147.04377289200002	5.171525911892879	5.6146565164771705	5.055034690995047	5.2062219470999045	5.81335988285668	5.6324392238558385	5.351478373733526	5.205746317107097	5.7747041272821615	5.407471307533939	5.579209860945553	5.486692100983406	5.4363337787963815	5.570615050143287	5.823831288396003	5.423460639736085	5.3661195940137265	5.709521943751258	5.6229255423742766	5.828854507472888	5.208566926480213	4.969498654047694	5.256954848740161	5.644979027412423	5.684366280913613	5.6870004703988375	5.280300309975264	5.219524694622371	5.341861925943395	5.5040503107208965	5.378524331804822	5.723682894590527	5.560610768198003	5.653908969845165	5.405736246742736	5.5245183947527154	5.543546239103375	5.540562138280111	5.560670371314568	5.553553193452911
pos_1583	L-Tyrosine	metab_1582	1.42995	各种其他次生代谢产物的生物合成;辅助因子的生物合成;各种抗生素的生物合成;各种植物次生代谢产物的生物合成;次级代谢产物的生物合成;酪氨酸代谢;硫胺素代谢;Betalain生物合成;硫代葡萄糖苷生物合成;帕金森病;苯丙烷生物合成;多巴胺能突触;酒精中毒;莽草酸途径衍生生物碱的生物合成;苯丙胺成瘾;植物次生代谢产物的生物合成;代谢途径;2-氧代羧酸代谢;泛醌和其他萜类醌生物合成;氨基酸生物合成;甲烷代谢;苯丙氨酸代谢;单环菌素生物合成;苯丙氨酸、酪氨酸和色氨酸生物合成;新生霉素生物合成;氰基氨基酸代谢;可卡因成瘾;蛋白质的消化和吸收;异喹啉生物碱生物合成;氨酰基tRNA生物合成;万古霉素类抗生素的生物合成;癌症的中心碳代谢;烯二炔类抗生素的生物合成;黑色素生成;催乳素信号通路	182.08085707900003	6.740524085678735	7.179203738795565	6.644017032534538	6.777141786971147	7.3721253516477105	7.195942620835456	6.90942707344864	6.872138640196695	7.314163931755017	6.969725383782678	7.1434303449383885	7.054330201304281	6.980861649790107	7.130251346257984	7.382278717648331	6.989771148824282	6.950433086694505	7.261775756525028	7.170934481635892	7.38562151138862	6.768949030122307	6.568841613877691	6.814559327768199	7.199817677168831	7.243476114893505	7.234619067286551	6.857946464018383	6.791643706292692	6.898468602851072	7.059362750300704	6.9494350738318005	7.276872824846894	7.117591534006523	7.217988730775517	6.9499564580237365	7.082258524197524	7.102842533147402	7.101120376299554	7.112825037298597	7.112356962617098
pos_1584	Val-Gln	metab_1583	1.42995	-	268.126	5.484336479748687	3.623452661418357	4.3516346443973735	3.617688175758632	4.514158949697948	4.870544592219032	4.89766039800017	4.847684028961367	6.027346495241178	6.1321816003441	5.831602495962057	5.927247032039889	5.767283575714966	5.287541100910152	5.012036889112745	4.092692071113063	5.1490155619834805	5.872345245482175	5.771176561474882	6.232532623718349	4.890591467048955	5.801129237097545	5.928275717039634	3.9565275647132383	5.237316881751137	4.823587753042263	4.173645629963337	3.61174094949464	5.857202651650297	4.372600777431847	3.6551324879790186	5.982611741483675	5.141622676534699	4.417944197306546	4.877511897265396	3.2543655560209097	5.62120096192275	5.605130903460642	5.603598685753584	5.612676101316638
pos_1585	2-Hydroxycinnamic Acid	metab_1584	1.4353	代谢途径;苯丙氨酸代谢;次级代谢产物的生物合成;各种植物次生代谢产物的生物合成;不同环境中的微生物代谢	165.054	6.502230106316078	6.940753005029018	6.399064094937893	6.539175218150557	7.134448494041978	6.952918588165307	6.674433235878719	6.531863605771082	7.076795613584036	6.728479510895912	6.899519931295174	6.812945943416853	6.749447847498421	6.887335361255717	7.142694990841348	6.746586346692668	6.706779172551782	7.016334597401732	6.935812584010775	7.144986589425625	6.533447634172338	6.33470717706487	6.57985841292003	6.958861302782657	6.996221461482907	7.0031340993821285	6.610102726041893	6.5567511762276345	6.663704581946927	6.8120820613809965	6.707528565839759	7.038070354189376	6.883746392636893	6.977963820637264	6.714251748663317	6.848483591412692	6.860875902957607	6.8602007513844825	6.869337499828613	6.867987557770674
pos_1594	Gln Val	metab_1593	1.47268	-	246.145	5.316784664767918	4.7613509427302905	5.20074917584926	4.372361119417558	5.0218284170838405	5.209166851430222	5.741426829611671	5.646692506940773	5.812858212424585	6.0326077410364345	5.991550469294433	5.93607946260333	5.816809121426632	5.4929631197990885	5.069722188570248	3.4494648070433	5.874179545987449	5.733818171463349	5.7739983163746285	6.2097085814504025	5.6912612052602025	5.66142233749124	5.8920881108099605	4.945155177216355	5.720669065276869	4.452102446595887	4.925745924937577	4.712443685215809	5.773351328673438	4.774144289996431	4.796946495959546	6.181872791277943	5.866082681033143	4.624779300094763	5.527354629200073	4.250915014985846	5.659739790434019	5.651861775934208	5.666062881978824	5.665540093325381
pos_1599	Gly Val	metab_1598	1.53695	-	175.10740805400002	5.488760275011043	5.62690306759104	5.4321784373116815	5.1266571377139485	5.631950314408763	5.211341238801953	5.484315411039734	5.78036633858112	5.589193271371699	5.8322709135653765	5.723600202863093	5.89884811589875	5.800467399400836	5.841391238830641	5.831170914527787	5.193349571940576	5.826533406022072	5.940812635522717	5.399197354175056	5.933225671764505	5.644009316492361	5.573957859991647	5.651179458281258	5.350783342460655	6.009510426368584	5.404372415411219	5.6215509854981125	5.484750605949934	5.495892702337756	4.9653634774941375	5.492471431407308	6.184818189822867	6.034849030815346	5.3759617918510045	5.693155834218158	5.21802387889137	5.6947206091820135	5.6944618659871375	5.720309548889518	5.713015819726024
pos_1601	Aspartyl-Valine	metab_1600	1.58497	-	233.113	5.140311333952009	4.735407653999904	4.514983071819588	4.614110964242661	5.4535791426590166	4.950904045374297	4.975999375063647	5.097461932717978	5.426170930141909	5.390862533226997	4.91964722081185	6.022112486606578	5.764566074889468	4.473918057745967	5.527824715545256	4.957040871751637	5.5795674037373635	5.800925463107941	5.191825631745162	5.8532482533936285	5.503426560930006	5.394804994857813	5.6780282680748675	5.118255949643559	5.922885810928543	5.765553195858001	4.578868441797421	5.01964707764416	5.460925751672634	4.803093165998664	5.332240194302839	5.857107089274508	5.562139386309563	4.7252416608627055	5.453607339161129	5.409610055820359	5.4450090757543705	5.455697579079359	5.4769402517749	5.4532415963461975
pos_1602	4-Fluoro-N-(1H-Indol-5-Yl)Benzamide	metab_1601	1.58497	-	255.095	3.617270750340348	2.787556008067521	3.1451520984411077	3.3850847505957025	3.822688639159799	4.155920302449009	2.95445243184201	3.847667139022761	3.9466199856090047	3.912386175188855	3.910280800720105	4.643774764270176	4.5085214730975975	3.0504655060737487	3.816851754241246	2.912544992363913	4.174824353938504	4.46966919163224	4.194453685858399	4.468167358313461	4.000822797301255	4.30124506905013	4.2670563857449615	3.00347462341128	4.531296344158847	4.398340387352438	3.7326599049704887	2.930873458292485	4.091862343118044	3.4760845494222514	3.987429306291141	4.510826216341504	3.9154862861036634	2.8703392269854127	4.053448045271736	3.7456287451177706	4.011879607657499	3.8712314718233376	3.934640413218612	4.098752488769671
pos_1606	Acetophenone	metab_1605	1.6065	芳香族化合物降解;不同环境中的微生物代谢;乙苯降解	121.06461336299999	4.771602583793219	5.173512868050241	4.881714459687676	5.618720485826738	5.2697578198216535	4.790313355331358	4.540579871583184	5.49881168295825	5.65248158676658	6.591932808115122	6.835795893620004	6.569767444942976	4.654010819963906	4.580417940137097	4.436792769011179	4.691880631324275	4.718769448246731	4.7380975170537365	5.522738252283618	6.08160061741704	4.322813894314547	4.867862142782942	5.293347820659832	5.310889470306657	5.165285746131007	5.860525014094311	5.3821935239426635	5.881564868713154	4.719847773619035	5.087537855092356	5.2797371211779085	5.69808034719305	6.642700749608675	4.431039421921244	4.3478823993315725	4.778579745024775	5.88204492139493	5.884660872116946	5.896101891266056	5.8808026262932005
pos_1607	N(Epsilon)-(Carboxyethyl)Lysine	metab_1606	1.61185	-	219.134	5.978428073237108	5.687834002554319	5.586425189739384	5.1086558234125965	5.965924546077035	6.1361098578649775	6.2777386972152165	6.2600507669172405	6.274937917255727	6.587714858257415	6.501981049628551	6.45158879790867	6.295334077294062	6.155285890995715	5.927207761491742	5.3378865049442314	6.3172956135922655	6.30018758386629	5.880131060835898	6.758052074818674	6.23390250480537	6.324275174528947	6.401990345862553	5.795420596865473	6.4381468168728615	5.842377154473119	5.667310789892005	5.541081597983582	6.329397764491223	5.6404037519563985	5.580553429513676	6.5423738070597866	6.311790390978652	5.830030650914496	5.775884503089639	5.856311115608548	6.195082975437702	6.195391384263617	6.2137869311719065	6.206219565506362
pos_1609	Monopropionylcadaverine	metab_1608	1.62778	-	159.149	6.002043642102709	6.85532510091854	6.130735387841773	4.100458720909358	6.0941058345271575	5.393552018954524	6.2741546299903606	6.4902802861541975	4.702050879454052	5.253255045991554	5.2956303131067015	6.288217620313327	4.738477072088799	5.651722262152783	6.092321575035952	6.183327276708355	6.294027411146426	5.068261990306397	5.513605925771129	5.507004700606156	5.955647909032187	5.149506144645745	4.866950684767058	5.775141162694211	6.3300853351766655	5.884756800277972	5.786604301160357	6.747954022381076	4.272278890322882	6.048830691112969	6.914152912400278	6.390746515453067	6.6965209649725805	4.028753352042392	4.491581686398609	5.632391990286973	6.224297550722282	6.233266490430378	6.2527971122455455	6.238458373090732
pos_1610	Arg-Leu	metab_1609	1.62778	-	288.203	4.9535186941671725	4.975181030634039	4.511868421805674	4.191274727845311	5.501635930290932	5.02998849802389	5.987608261763773	5.189740568887852	5.17584299497642	6.00378889000561	6.065339218023701	4.8532998183187095	5.295387077312605	5.698411007066585	4.270587724575071	4.355636481488836	5.640294527578018	5.293329662062503	5.82303482098803	6.2328406437961	5.534345920751068	5.784106558825385	6.256115139220388	5.0363998158013255	5.350248415489087	4.5673114046253565	5.160608982689813	4.511454067710576	5.9706526207389725	4.6799076498979195	4.582595990208656	6.0509219260468505	5.70511522284276	5.110924713838656	5.895667626431463	4.683932293009106	5.658973397141389	5.613254092666352	5.633667826113081	5.656597865592593
pos_1616	Leu-Gln	metab_1615	1.6704666666699999	-	260.16021828099997	3.0989474981668996	3.4854697013761413	3.873739879946138	2.9114148017197587	4.488932698180085	4.271580944980692	5.01369423083079	3.8912034063478567	4.169140422329637	4.84709951360833	4.321247622739122	4.280848526569471	4.147433172689179	3.8781256059324836	3.2814504669901514	3.079066889923768	4.5344085880335125	4.256432054892497	4.581553310995955	4.334544133590206	4.2460367216970365	4.938455732123763	4.907727107365967	2.9243612024983765	3.9640519408564447	3.9705062988175612	3.7064673193240014	3.388746033590274	5.27239771822967	2.9618827733519577	3.2184859343898493	4.497915475215423	4.150541991299408	3.999918604898312	4.4665010610185805	3.172385416213804	4.308495353271812	4.409725683804997	4.419852912896157	4.4272153784604225
pos_1624	Melleolide E	metab_1623	1.69655	-	482.218	5.169253432255585	5.546540822992856	4.682994597108522	5.8038144941886785	6.3773618542477735	5.995589051664785	5.366999554996041	4.914441944715423	6.201787147769729	5.588146242746637	5.797720112416028	5.686471278060192	5.755179670719869	6.0665008801187845	6.3811450567974255	5.914721365895661	5.031764312796488	6.010406151701432	4.724036034538437	5.841646837790545	5.27013446987216	3.846450139251687	5.4584262521856735	6.218144297416539	6.250160929107769	6.200096525417334	5.680218183700722	4.440280205530863	5.667588820958301	6.1168377314996825	5.320158158062876	6.044021401769549	5.943186686821711	6.268725124341708	5.859692954543611	6.1414177677314346	5.785835808868028	5.792169724216822	5.8091100698849925	5.806117752917192
pos_1648	Thymine	metab_1647	1.7546	嘧啶代谢;代谢途径;核苷酸代谢	127.05	5.686024352027464	5.748869276398373	5.746917723113871	6.024155540969415	5.888113890892732	5.867612078857357	5.594223218237711	5.914880381128311	5.141897351016926	5.2726514692591575	5.2540463940752105	5.045742682108587	5.625298053369692	6.069256951876336	5.727422634295987	6.192345421051344	5.519204154222223	5.410327931913597	5.080806275270233	5.734593335138237	5.651037249845882	5.084343510127797	5.462094083147759	5.748524068068481	5.6172902162460145	5.215974041752678	5.969071103323397	5.70050489285087	4.7496366301462025	6.224932441334336	5.643536670745907	6.02032384159135	6.087328873154827	6.124253199955512	5.504603691991683	5.6602791658402465	5.738349864216974	5.765439053958308	5.780100050393982	5.763883685020555
pos_1679	4-(3,4-Dimethylphenyl)-1-Thia-4-Azaspiro[4.5]Decan-3-One	metab_1678	1.7546	-	276.144	4.0584862786907285	4.2253532580398385	3.895391149812944	3.898283236866748	3.830634605785537	4.222925358125131	4.5891054297311165	3.980634979244908	6.156547208704227	5.202497229399423	6.5038205583918085	5.78932898941293	4.2229956056557425	4.584771378197309	5.021233397199357	3.743756407813959	5.288140563959892	6.0971753551098224	5.19836210611622	4.922221081887692	3.8684747088479874	4.7383155631929865	3.9669820685558608	4.136149598503846	4.879282967326468	4.142925065646728	4.157333153900363	4.657699597327584	5.539748184981606	4.748882513802166	4.582045068633441	4.435349708125722	4.494580876337516	4.992948393796072	4.740831768313437	4.724063102059441	5.38957668256757	5.399417606423015	5.39899894870988	5.399077991445775
pos_1681	N-Acetyl-Muramic Acid	metab_1680	1.7546	-	294.118	5.884369896734071	5.25423609408516	6.0131470920204775	6.340452647115263	3.7354540104229508	5.745585245586058	6.038525033799961	6.380874843323268	3.928083315090648	5.2158354626308085	4.039136825035862	5.197564884168808	5.320723676187306	6.074594391788963	5.340440358117284	6.441256338835816	5.118748989526349	4.46178478814801	4.685496304649631	6.366182686661345	5.543245328951729	4.785294584432107	5.615435175837698	5.7393014492250165	5.239590857080676	5.045071274458291	5.778214032864122	4.604265227456982	4.7578283543037765	6.6301514661981145	4.640772107557458	6.54873366859344	5.804348679230992	6.09105413203815	5.092355269894552	5.935592520568032	5.90584368867617	5.895711109978852	5.9301924248304605	5.92976826513473
pos_1684	Hypoglycin B	metab_1683	1.7546	-	312.154	4.6109243088943614	4.559579465790431	4.642772231783969	4.109753242285269	4.52031981969153	4.9033611921608005	4.768532115414562	5.4114202926452695	4.641340470274118	4.972468009000526	4.689945974277611	4.493415746290204	4.4360402142501485	4.7686831290288865	4.425174770359399	4.833012040254656	4.883916270297823	4.8509538581037415	4.53667192524129	4.867584613163982	3.6993483590390346	4.52130391575885	4.391157540228451	4.566500512264827	4.343564461318098	4.0811777048004325	4.537625061735638	4.3792245641928575	4.7143016799739215	4.875118257705297	4.632264846159783	4.583029836419448	4.4406124006145795	4.967442481241432	4.629265914960631	4.89563500358234	4.695668128130904	4.750548717801932	4.713696647692637	4.732875129230988
pos_1685	3-[1-(3-Fluorophenyl)Sulfonylpiperidin-4-Yl]Propanoic Acid	metab_1684	1.7546	-	316.1	6.63533131699813	5.853883620811588	6.676091430640402	6.979468179554668	5.091020497923483	6.351772410488154	6.635483135437305	6.97273700930341	4.919167508680997	5.905296604187548	4.4686326303856205	5.736144897526669	5.98689452034284	6.66361035183905	5.988835412053121	7.016680856646488	5.846511473586595	5.268838049798613	5.592211302548551	6.999815159092589	6.242293158160822	5.625117421401424	6.329573550986029	6.328409088011575	5.8371547625738005	5.7102243998600235	6.301979913953041	5.006513056993956	5.557093629403161	7.172366131863611	5.416116889455913	7.083679726291248	6.3363595383637135	6.621896776052316	5.725245642331588	6.535776970401225	6.517967124425447	6.522283963049404	6.527811098139512	6.537503018682504
pos_1694	Ile-Hophe-Oh	metab_1693	1.7546	-	401.166	5.797605601949908	4.141923076491889	6.303882811230237	3.861952662557561	3.0095540883125724	3.0805681791145965	3.0169982865482847	6.62887462686325	3.1414711899771848	5.9160963179403305	4.368117053488489	3.739478630795925	3.855482563592415	5.0482991815893765	3.5516837528390686	3.8889134672360246	4.805378319261876	4.538005319899382	3.5693346407311024	3.1198569059428056	3.2933729798612426	6.13523154877553	4.321962979594627	3.5952562594246986	4.095667512287621	2.796226186343143	3.8802614735221765	5.020822484633795	4.5626021930682965	4.1793232939581255	4.558392202411013	3.5123663799665823	4.468650033273105	4.426427184069696	4.312064391785818	3.492877441663341	5.242888893675626	5.2613563318591305	5.321597231794546	5.2785757747575985
pos_1699	Trp-Phe-Thr	metab_1698	1.7546	-	435.20712078599996	3.795318770779647	4.009169489327278	3.4053827667532124	2.805157622846989	4.057626214830187	3.6638110539180393	3.593536006593636	3.524053795022964	5.0313198038999305	4.104199976875666	4.288603713447087	5.585472082334796	5.1222798114483306	4.005826935977149	3.9564380413766362	3.546014637680666	4.177950102415572	6.296863296538187	4.418047223904326	4.053489912649087	5.2741518079486855	3.8530300824481385	3.848881205909197	3.8949996823431983	4.2549070470349974	4.9732255190945205	3.4706718493359823	3.687057919609628	4.38387839503848	3.748034448894955	3.8003309985749065	4.005710670818273	3.8730733612902166	2.3939289979331595	4.195027548660058	4.087790614811138	4.560664378751216	4.423255014703202	4.528371278731714	4.514804186069937
pos_1717	(E)-Ethenoxyimino-Oxido-Pyrrolidin-1-Ylazanium	metab_1716	1.7599	-	140.082	3.845098297171663	3.7639967071301834	3.5208015488364217	2.7661190413805503	2.624596852166249	3.670932543053629	2.924426864072947	2.8799385911052964	2.296519524225504	4.198199184236237	3.5995740061168964	4.027084551187715	3.3751414325151807	3.18129985524616	2.7556811358831914	2.460251096069994	4.237567484651696	3.5433821399487533	2.9327090546236563	4.7670331397553465	3.0201056455434716	2.368515121903225	3.1178661433170767	3.5463234388180287	3.9325764893094446	3.319245246711569	2.4835076625543944	4.691775894421992	4.394553622621497	3.8275487091978415	3.2787892642154755	2.5084168084938243	2.8070184746393423	2.700556348518224	3.3629578845918187	3.606396103628666	3.839166011630677	3.7097332811143513	3.835576668564728	3.7909043332739514
pos_1719	(3S)-3,6-Diaminohexanoate	metab_1718	1.7599	代谢途径;赖氨酸降解	147.113	4.2051973871416966	4.171576373146412	3.948785899251385	3.8222370320064334	4.22923993194452	4.3393758139475285	4.868502404835429	4.157382269876521	4.4505270494939815	4.642288039550474	4.569690468795126	4.244738823349768	4.18774139757144	4.404292052891802	3.933891378389538	3.9346485353780816	4.607789525292621	4.617271613385677	4.5671864114359435	4.447332214766019	4.1793519808198925	4.676197610741299	4.476346083468711	4.174943037797852	4.207392123324707	3.709567237466696	4.111287730229448	4.1595298609005145	4.789532829518299	4.13402459083125	4.3548791098931785	4.344853491105963	4.276040975438382	4.147287324626067	4.410965299010254	3.951795385179652	4.460885093537361	4.430466095600528	4.382750010247002	4.446181588504909
pos_1723	Medicanine	metab_1722	1.7599	-	160.097	4.8970189338248415	4.705169475179731	4.7304128762259605	3.9500597322892763	3.33325780367854	4.882263286223162	4.669873270765757	3.703520702047304	2.802915471152823	4.607308753273294	4.325470867724607	4.553733113477627	4.415894657512316	4.424964843582085	4.22963741183372	2.2538189894184715	5.045158485708723	4.272589595153819	3.1461831191211336	4.562782589317157	4.323439840371353	2.1622991143605765	4.05628583287892	4.658519475046717	5.051720923177683	3.972919605086112	4.127899442970909	4.6610839818970655	3.993249051674191	4.910964852573488	4.277795207471312	3.666050328380369	4.333328682770274	3.015527274061529	4.325599143016893	4.622388666595682	4.415217804055887	4.495400251078167	4.547945503771534	4.5577441615526775
pos_1732	2-Aminooctanedioic Acid	metab_1731	1.7599	-	190.107	4.879547977925294	5.739997649761496	4.953688122020378	3.6079590759920164	5.3513975359809365	5.028844066342861	5.410059607689772	4.846704678721034	4.156739019409786	4.594221487697301	4.559384184832834	4.495980779073647	4.575645935849568	4.957763377110989	4.614573179639885	4.364700685149572	4.738348559487664	4.348355030883231	4.500443757046083	4.7130569042172725	4.27375882204016	4.71013105839121	4.688552458558791	4.701635337288857	4.664977808479275	3.7107161475546366	4.099476792937069	4.864815287394964	4.952820660486197	5.4627711948905056	5.205984295465008	4.619981742146413	5.219925838703065	4.2989983763778445	3.9666413011144974	4.988386173388574	4.923447742163072	4.921325574183552	4.90416134232595	4.929419150458703
pos_1739	Ile Ala	metab_1738	1.7599	-	203.13877285400002	5.056812403065205	5.3819902612554005	4.990489139788439	4.8137117301388646	5.704852050915736	5.495095526684736	5.777474306357579	5.363888124811346	5.273859787117011	5.724150212769799	5.4814940116844975	5.474486126071482	5.33419908257234	5.455173208739857	5.240138688190586	5.054436267508937	5.553372000890912	5.397068006959993	5.541924689218417	5.770281880792132	5.345824235036797	5.820820700805823	5.7569947680684805	5.415162775359336	5.3217260897681795	5.178437136427582	5.456601403850208	5.191923494564642	5.769486857252909	5.440490221393074	5.256610267692956	5.976019515303353	5.544367860377871	5.524909237889202	5.435284476972384	5.215587258546148	5.498978642952904	5.511430922415501	5.511351797639263	5.502346572705664
pos_1744	Zalcitabine	metab_1743	1.7599	胆汁分泌	212.103	4.1332928498862005	4.131075386137675	4.435250838394738	3.8544746676218735	4.363647833640868	4.474886604237415	4.901246690708568	4.6422713560435405	4.545259543185241	4.9252359868913205	4.948755824669703	4.146307352038914	4.383314002522262	4.817972730936744	4.126179544395635	5.023186049312039	4.986742623511574	4.701612299825724	4.694195216699144	4.7464118877290336	4.520420298503437	4.840090159960244	4.663007577066477	3.7322293719085873	4.909347223187795	3.7398555052662807	4.415924328771013	4.1650117785496565	5.05031394844802	4.6483281240762775	4.476432185788355	4.6334153907939335	4.704056013395398	5.397438283944896	4.460294125553248	5.1133398490724415	4.687144954125248	4.6830364329495	4.6887474303269885	4.698967662029915
pos_1747	(+/-)-Propionylcarnitine	metab_1746	1.7599	-	218.13844646599998	4.072915417980831	4.212175486976232	4.238169570409984	4.2661507346524035	3.893654557859962	4.326856744793028	3.762650560575998	3.8017759878772615	5.459488130437663	4.412288170178769	4.9096230308465865	4.553829436540807	4.216533693891612	4.1083541453612105	4.25298610301904	6.050444113365897	3.92125601663553	4.3394479755532815	4.7813570142138735	3.869576154216845	4.148224155267264	3.959719471934707	4.125924301696225	4.128940999769287	4.109581446332313	4.3016508441191865	4.201865347003332	4.265944777980817	4.634855230564409	4.09165640521924	3.99088204512581	4.041495870642351	4.186147259488871	6.562306419035107	4.451286317246524	4.100372025783904	5.193513026686519	5.194084282065032	5.20900801607354	5.201461230516797
pos_1754	Leu Thr	metab_1753	1.7599	-	233.14927826299999	5.325044345010218	4.848231006139766	4.96037647531888	4.453045327134868	5.225636533150986	5.354903096642566	6.0316277735920245	5.204972862552986	5.280129469670087	5.800510658119309	5.7397445999275885	5.521970289313713	5.633936873012288	5.325069096745482	4.900875745043413	4.679069601571541	5.718114658054152	5.533452773751124	5.735338056657637	6.000973533445035	5.482270863919601	5.823441231369362	5.9260841888419735	4.867875708088494	5.189998473467528	5.05438237695596	5.0595748964709335	4.789301950375196	5.867191505252043	4.855960550730265	4.916810328460384	6.044622376730462	5.559414735128692	4.978703278499987	5.3697418598052655	4.864391050444475	5.490608579389559	5.524242870813682	5.5281570705966905	5.5053106874550295
pos_1758	Ile-Asp	metab_1757	1.7599	-	247.129	5.5564415859904335	5.358352108693267	5.1906657332190855	5.7537355661971405	5.510600436921028	6.325626743056632	5.5895855345283465	5.833594070647028	5.117858208275957	5.640503054847208	5.2209990005501625	5.409024630829017	5.51050612492166	6.158571161005215	5.630736222924401	5.225184015651282	5.709826729997008	6.278523550694777	5.324031873207879	5.74866127984922	5.538493199899465	5.6240408854313895	5.655723518096986	4.978281102644624	5.754048355190518	4.966898909336332	5.571925811432064	5.396980932259891	5.666836366972679	5.347228694955117	5.204511443333201	5.9838053558797135	6.0831684379397615	5.8228040935190855	5.3014614972440235	5.199132463890012	5.662271773682388	5.6996535642054855	5.711649591040329	5.671887457637509
pos_1761	Methyl 3-Hydroxy-2-[(3-Hydroxybenzoyl)Amino]Propanoate	metab_1760	1.7599	-	257.113	4.655077190468832	4.929209657103001	4.704994741165628	5.025664463378726	4.479775833816731	4.959014765373052	4.3521894095800056	4.746371873594773	5.1288927419408274	4.883979059282941	5.606725044912976	5.639061683839179	4.783817201369785	4.964420257921062	5.056059125318022	4.899140643081209	4.835207181844519	5.748234239217442	4.9850754041545295	4.8648681163169245	4.538133936440942	4.618103592298773	4.4982448184357775	4.562254487370156	4.637701639666852	5.167269281312292	4.923700699421817	4.5130031238388115	5.251950245858878	5.109702717633851	4.518650017459712	4.953081402354725	4.52628772752084	5.1110969111600815	4.959924734259307	4.8815704708732754	4.994280237860389	5.030551690819727	5.039219615840851	5.042119521030878
pos_1762	Isoleucyllysine	metab_1761	1.7599	-	260.197	4.72654309472647	4.368575898362199	4.563320758427883	3.4428780718575265	4.889460514626432	4.926820094037417	5.794596330133463	4.615870033392834	5.1435660155289975	5.363003902647447	5.1608362510394965	4.754073758013723	4.93554229509145	5.055483239389049	4.6410148946298255	4.142656631147938	5.386831162074912	5.398136206418064	5.368008381113745	5.353269452742925	5.087104086865597	5.351810974722515	5.3326360348877975	4.475860430566148	4.773828498832925	4.230097925064304	4.53983891432049	4.575607901057291	5.398864357226592	3.92376831821334	4.713584713420132	5.241785540635969	5.197940820875017	4.555108644842384	5.25849463874008	4.084953827073924	5.053548698850505	5.046200271084512	5.084032587286154	5.0712096890417495
pos_1764	Adenosine	metab_1763	1.7599	代谢途径;帕金森病;嘌呤代谢;ABC转运器;核苷酸代谢;血管平滑肌收缩;cAMP信号通路;神经活性配体-受体相互作用;脂肪细胞脂解的调控;肾素分泌;cGMP-PKG信号通路;酒精中毒;鞘脂信号通路;吗啡成瘾	268.104	5.035077433624178	5.601394930331431	5.236467084931488	5.338123446786577	6.142076407599551	5.915484243385441	5.477754171091383	5.392260085342913	4.617731313039964	5.101797853876469	5.156624777134552	5.281584250121672	5.265868709080947	5.711345855900476	4.883701626876444	6.087053657488768	5.453711225913254	5.0316941214778765	5.453652166627034	5.544847128602783	5.322795973824888	5.259644822323916	5.567788232290792	6.02621509972117	4.983172818600614	5.029382745585774	5.360368845946215	5.578312832840734	5.133105138203383	5.688092077378283	5.0378274734262884	5.638141190353798	5.4190678223851005	5.3392034214768245	5.00932964824975	5.791259523167938	5.528044120341708	5.551885192241298	5.564669423379471	5.5594628180177175
pos_1767	1-[(5-Amino-5-Carboxypentyl)Amino]-1-Deoxyfructose	metab_1766	1.7599	-	273.144	4.385540355909785	4.96662128222112	4.5194356161609495	4.579596451782376	4.068503115295898	4.59669309069641	4.179530791800756	4.310961844341842	0.8952817684232144	4.455690956830456	4.554108385504144	4.546417289705398	3.807508946315528	4.406191141017708	3.221569799162169	4.884213713497549	4.490075037276145	4.2990619010225615	3.5066619177037985	3.1713841899305577	3.5830868582045414	0.9590504260003264	3.5124437386066387	4.858993349420934	4.545405884995275	3.588424082388252	5.014890626346593	5.041995864197273	5.187717297456387	5.0098195142251445	4.6419357796222895	3.835115322272257	4.523608729186972	5.083503316403856	2.9160738803067527	4.9135341674978905	4.597888952213119	4.579081947790211	4.608760784130563	4.644553133459259
pos_1775	Pro Ala Asp	metab_1774	1.7599	-	302.134	4.815252923883404	5.04694079896729	4.731204637269356	5.041006097143276	5.054817507639954	4.895496613546731	4.896349173619916	5.609579449082232	5.058570945820918	5.326144868355224	5.131241930640528	5.359976399196583	5.070011343575608	5.0284985495950005	5.140125105596359	5.068172589123614	5.205809984596487	5.2984350605017685	4.522081130338932	5.3153155588013625	4.912276761237512	5.371410002583471	4.9610613618421615	4.88476799268887	5.129134376624581	4.6142210581281615	4.777280131814201	5.070489058898239	5.236757073541642	5.196432015068988	4.9330527535251045	5.016253760995385	5.027780764428762	5.246545345590543	5.012323812680728	4.977010305433165	5.050948801230132	5.045987480951236	5.107768031514394	5.0844903113392235
pos_1776	Val Asp Ala	metab_1775	1.7599	-	304.15	5.336383150359795	5.5440189193854295	5.352876381604626	5.441435306199039	5.716024506390222	5.333958475244937	5.742120807071668	5.501561510501093	5.503634771145396	5.648119881402918	5.806756331802298	5.548160852614283	5.6171240074505695	5.472422271088668	5.3714855205264005	5.246106129223969	5.636570380834643	5.835066129028663	5.542465560587711	5.895440197232157	5.490832602537608	5.596641012040963	5.495459905560712	4.715708566660989	5.5881043745399275	4.645663528197242	5.205421819673865	5.08973146814601	5.675296384073559	4.949480114214934	4.691209026840038	5.7759054228477025	5.6501667524787536	5.016184981702423	5.589651783390106	5.040877304373705	5.498138543178187	5.5177539101717015	5.497053440444256	5.501806745059959
pos_1783	Lys Ile Ala	metab_1782	1.7599	-	331.234	4.769124493925843	5.206924318063952	4.6009185986112335	3.850256525965868	5.427123170153894	5.127330601648569	5.6845128414388535	4.784001160729532	4.768139074098379	5.453665061248494	5.360727275408796	4.560512255433114	4.866474315652594	5.420061661770011	4.734204273461724	4.395784683570765	5.371751531899164	4.992056107700992	5.850464197226253	5.862815208978867	5.161392006155447	5.3760802373482415	5.728597471601797	5.152069036841231	5.042270489995085	4.449717927867469	5.3238316967111565	4.599922563683036	5.604631306668292	5.073565005668587	4.412910535125942	5.741925185824603	5.466969047325345	5.291551953114734	5.3806573145077214	4.773053668629546	5.263088607627969	5.320846261757522	5.283975858631257	5.330342704496772
pos_1784	Asn Val Thr	metab_1783	1.7599	-	333.17617306799997	4.654887497698381	4.608146976648488	4.297943703982924	3.755832519869656	5.1848737551000665	4.790254336480361	5.45226290066674	4.4810885495891934	5.332316278753309	5.483937535432801	5.437097707441465	5.119102627759666	5.160431119864239	4.937895676526041	4.529521686398514	4.566943447662563	5.500477521600146	5.276451163281116	5.5622673265271185	5.414236590828613	4.900347822151043	5.3533288640111785	5.3251418348247554	5.096245525470055	4.929949219654663	4.357936578717979	4.946582615105671	4.501639036227711	5.611707889916501	4.766771985311154	4.489767491466296	5.534748824875922	5.050064482780086	5.048923287710148	5.378740098916395	4.478175654301616	5.10849726124957	5.093321034134432	5.143422189362312	5.140525188304783
pos_1785	Cellobioside	metab_1784	1.7599	-	337.147	3.3531767639946795	5.315729071688869	4.6794430105091065	5.965235631254148	5.5930635439907	4.25149218712582	3.0347643174032934	4.563356704607325	3.2545020903700115	4.550798675102079	3.5198043522067888	5.0079242958509855	4.470334463449809	4.970023690425808	5.5890654979238015	6.686578149155247	4.6696600818144125	3.8579700028371113	5.8175288552465005	4.124712441232493	5.519076290670806	3.786535294500177	5.414674778452588	4.886946996100783	2.9697579863913264	6.103498565346483	4.957007414196661	5.499780937321526	4.612404426576746	4.286172893614377	5.105154632155923	3.533971099242401	6.5171523858384335	5.792558111865834	5.586528808284428	3.2733642884993928	5.579519115646876	5.6276438970538605	5.6380602262148205	5.63586416881078
pos_1786	Histidyltryptophan	metab_1785	1.7599	-	342.155	4.976964279101788	4.979879499107903	5.066722373035712	4.862691800065944	3.8984555631804483	5.393817357846252	4.959306713754952	5.6000700190783395	4.384481117080543	4.7215583388881734	5.091681591954981	4.738535182769504	4.2278190201676535	5.316686242593762	4.531206486101212	5.413200473928589	5.416310468057229	4.565625610004775	3.651375759376724	4.575346296406795	4.62349098131226	4.75595119403541	4.491690895587048	5.211421106474508	4.4817433165457805	3.6768969090134864	5.242197327033749	4.67197239173329	4.983793239983192	5.59472532257865	4.8734371295511165	4.638700082479294	4.996855136476482	5.26679386533717	4.328528207171687	4.8765428669273465	5.1124124902134085	5.097408106831813	5.053752587408102	5.081305204423778
pos_1796	(E)-Zeatin Glucoside	metab_1795	1.7599	-	414.198	3.1324241264374386	4.127403166888229	4.234955993125051	0.8006733617231336	0.8778490044945404	0.9401529317977482	4.745022735260007	5.380321442462754	4.9700728950315805	4.4667966540715724	5.660415815511749	5.926750778116017	3.4551500594226927	4.3744114705944535	4.46038710488876	3.6866361962873113	4.2525924060395965	4.56023821110966	4.57272585621558	4.632686989926932	1.1420948793975425	5.26520293170691	5.4241905767337375	3.3725556927547014	1.398177562812816	2.7733547333383846	1.814645637944608	4.2567537307531325	5.471988929297424	2.837157944677236	2.295997315044452	0.9556901117145596	3.4123651050506836	0.9093560244236264	4.673361020387042	3.5832990273533607	4.8614129650371005	4.933831422005276	4.848569331223621	4.886070473698588
pos_1798	Brexpiprazole	metab_1797	1.7599	-	434.189	6.571643758400793	6.85824449975367	6.5623408589235535	6.150031508356397	6.9281570036400675	6.724367616836653	6.605196229060441	6.627240382322537	5.499502971008508	6.519019837530648	7.244636419605454	6.2356055570403255	6.232592469761044	6.9505466700112	6.505876066382687	6.400869905013157	6.34117672821208	6.7864945047268215	6.632650928244014	6.7499420201792635	6.380997085162556	6.642114598588321	6.474116362799347	6.711420748203237	6.86553927815113	6.056545979945715	6.445366476907521	6.69831228738216	6.482676433315749	6.669656142323315	6.747144363871849	7.164572311241218	7.076715804741955	5.542979147051722	6.323694604739341	6.6032450792100095	6.679740726170398	6.716548554169707	6.716282810958236	6.7086218357613
pos_1834	Tyr Asp	metab_1833	1.76525	-	297.107	4.265393808356203	4.397325374612847	4.525369756966018	4.143642271359451	4.7120566835585285	4.553905466599228	3.8990445285187807	5.372448320907512	3.5726536220114262	4.507777033525438	3.3067266167036933	4.023436457321984	4.405781168126222	4.306507779141389	4.972634895070807	3.706050239901885	4.620113747329824	5.699682097549172	4.1221279538743145	4.298074192696824	4.202396397890953	4.7289760887361005	4.410334121015862	4.104547531916432	4.487265702679332	3.3220220015723783	4.141708737433254	4.3289261862342014	4.693205203004879	4.318550257938167	3.7011735291348673	5.168239248241684	4.294447535927475	4.643903648578865	3.9722662688945016	4.906783538726116	4.56615830999664	4.586487452625455	4.678125995564773	4.7737006656592404
pos_1836	Ser-Ile-Ser	metab_1835	1.76525	-	306.166	4.716251167571857	4.538469838298623	4.24238582841288	3.4900097572985547	5.077452076683411	5.063294612851348	5.149559880751892	3.9518094833533888	5.867445966225471	5.216516814463751	5.034883470160564	4.9962500222535615	5.011887274361693	4.824947944854699	4.506382582445321	4.278597985069402	5.22208436228922	5.225228776464308	5.328870023197059	5.016812306856708	4.816978712876494	5.004216982563833	5.122064467734144	4.759709814388565	4.8622339004243695	4.843828114321269	4.820352874067524	4.499126705187859	5.310160367887161	4.814621416463148	4.408218959564909	5.300854280338618	4.89440879876474	4.470378054269913	5.264123031309914	4.6209761069463005	4.994272813591752	5.025746698306455	5.0752321837033465	5.027479199792201
pos_1841	Glu Pro Gln	metab_1840	1.76525	-	373.17142718800005	4.458584671079437	4.66195420068112	4.793637055562722	4.516904107175374	4.9343534750693525	4.754021465473527	4.787286002441844	5.230509765369394	5.109254615800986	5.132134632489741	4.978808386258022	4.912689835084652	4.78707848238578	4.5359144707423935	4.5275851516081245	4.204763575993174	4.882449050650534	4.959748359328311	4.534459155570633	5.423387326039263	4.4256327629950505	5.515491264936408	4.696176453815867	3.8242816167431033	4.751175805032559	3.227221728635888	4.338434125352308	4.842045099355123	5.276375734740518	4.485347048253688	4.122044468770425	5.08139815813571	4.518564893167379	4.108490592838511	4.5848921080776295	3.653348746949936	4.8915935104867385	4.825461524352999	4.892643206530008	4.941697448940189
pos_1868	Gly-Pro-Pro	metab_1867	1.78665	-	270.144	5.041350489447899	4.723092531915209	5.137928282156334	4.124893957097576	3.8058387751015763	5.0819963779341215	4.442707818437379	6.5047250487242385	4.503859240601473	5.182901067209298	5.295903136091867	5.0168278969222735	4.491553478788477	5.1482935233041776	4.467223482091597	4.737222976866161	4.428584865011357	5.613954544745492	4.742453920494532	5.698424029131592	4.640548923127208	5.147237321733098	4.936278445873537	4.336226578091643	4.455487138086705	3.8710922537829786	4.7729700497946315	4.572268008175159	4.714209732479788	4.975126061417957	4.713537542161526	5.111732163048608	4.61582794197008	4.968859079954203	4.045383123913292	4.449537350787688	5.2571951761634415	5.2941900338776575	5.260434683725405	5.2597631875030935
pos_1874	5-Amino-2-(Dimethylamino)Benzoic Acid	metab_1873	1.7919999999999998	-	181.097	3.218353869301213	4.562779944074251	3.4606308040802163	3.548160811614265	4.877130293850137	3.9889838639511854	2.66808659953864	4.627059564933383	2.0081506406061482	0.97177701278347	2.4204262824215315	4.677801204239267	2.238300825287604	3.1567094938134352	0.9017688419956482	4.634423714077951	4.66463151339975	3.2887378978690736	0.9489254082593872	4.246026379305965	3.0086240044475967	3.06208657736408	2.237060117759078	4.237875421620228	3.916819030739859	4.553431619141226	4.4578945388817175	3.9364826600294482	3.1895094107444955	4.372906410451445	3.182130319326871	3.474462083660667	2.7736297147591635	3.786202430592328	2.2814455585080258	4.325047444204202	3.907592853609767	3.887985278428439	4.008373946349358	4.035090742879563
pos_1890	2-Hydroxyadenine	metab_1889	1.7973	-	152.056	4.619826625876546	4.964657583320907	4.73806648531555	4.562441884971797	5.288751008375964	5.014466428337436	5.639026550491183	4.808425469513273	5.212095582394952	5.228668075228329	5.3407825753208495	5.9751532201190125	5.671993683002786	5.017962257772238	5.505960001745268	5.004877971963492	5.767544724859371	5.2294660647237405	5.693981071565329	5.704157873482315	5.256871885458983	5.361504925971994	5.7976749982896925	5.539380501896592	5.095638877313962	5.418850597530577	4.825887747082538	4.837757143358257	5.598367003799807	4.9518653744457595	5.041188752736437	5.491973501815702	5.041299086269411	4.865071356106935	5.414467329843181	6.0815120837330845	5.393682492628028	5.418367630002426	5.425549179500911	5.423252927753029
pos_1896	Ile Gly	metab_1895	1.7973	-	189.123	5.150408987003769	4.666765464189521	4.790399585634077	4.358082326202699	4.910424850508728	5.428707342025484	5.612482362138766	5.259416293990877	5.3520861483318845	5.669959142656622	5.547114229775262	5.651777508279816	5.4621490293011465	5.0982263004526365	4.803533318351947	4.613753380042713	5.2940520424927735	5.413586222429434	5.091012131942987	5.769806821192288	5.097981392546844	5.539612369247973	5.5423756751484925	4.640171710531794	5.0136930927213585	4.566054511007438	4.670404170699245	4.717670452231761	5.351784717652624	4.553588815878181	4.679109812071985	5.768020402796481	5.266423282643347	4.763460186877157	5.038991133205565	4.495678862006568	5.266796607748755	5.29439230922043	5.269673920766143	5.2991714442887226
pos_1906	Guanosine	metab_1905	1.7973	代谢途径;ABC转运器;核苷酸代谢;嘌呤代谢	284.099	4.776933007233159	5.058480105232824	4.862722954673318	4.604368253887973	5.420198710579376	5.227021846181068	5.851037190756202	4.782973815219838	5.532761740067627	5.393952904903818	5.660970316970353	6.245456459446842	5.7586906161021485	5.073588120823713	5.809203395664258	5.006745959867393	5.906393386893629	5.376864992518125	5.386987654783876	5.954340761883511	5.3413797208594485	5.421708048188046	5.749514751298302	5.474737757814099	5.270573156825583	5.5187883566302105	4.3626138825933305	4.81525970610733	5.8031027724968745	4.929777104228132	4.9759465703111765	5.558598267645071	5.218425110671434	4.0651143658611035	5.522308222417798	6.021100508542287	5.515398291865525	5.528285356677022	5.537275629492751	5.543058010262575
pos_1913	Val Val Asp	metab_1912	1.7973	-	332.181	4.990982789573815	4.863412862178032	4.958009857164619	4.064402757318547	4.663874633255167	4.879353859142727	5.472923876206104	4.9345390658561135	4.8397229277744405	5.179582126121452	4.830596449048289	4.809411188723409	5.030876244720036	5.093030294138831	4.849101959020676	4.411060187773471	5.1740939973552775	5.262326732765052	4.723152360956438	5.24306120884873	5.2730609598160765	4.846727493919323	5.2865745521515	3.7241420502497	5.086518494235086	3.5148740204482722	4.8632269279285545	4.755736678907826	4.823071117078516	4.04657515682145	3.861149284542567	5.3814676693293455	5.4974866891987775	4.635868486298592	5.075432771460281	3.6291402862002458	4.940595760730469	4.9704547182889565	4.984806898648755	4.957643340578374
pos_1935	Gln-Val-Ala	metab_1934	1.80258	-	317.181	4.49474975818184	4.5214132597827765	4.806874295263022	3.298656067599116	4.8510638487726885	4.601972551060852	5.627692331578629	4.6268355990024	5.169196856801286	5.310118613320019	5.280479191899627	4.767644169499012	4.942448302492255	4.937585763647756	4.457397723218098	4.215471201415604	5.239786551864251	5.066394579241735	5.3572753380493365	5.258259684523325	4.8625439277863025	5.245582370874437	5.229436813422405	4.503684388753406	4.735025790978658	4.557348134293624	4.731830401023033	4.431205119386424	5.350684176239887	3.739425873493116	3.859584496551357	5.255249363074007	5.016873415306198	4.667825079189476	5.309614788485876	3.902652462611029	5.017893705829533	5.024287001329337	4.99485084313536	5.041243460594461
pos_1937	3-Alpha-[(4-Chlorophenyl)Phenylmethoxy]Tropane Hcl	metab_1936	1.80258	-	342.165	5.362504481469733	4.920757470792199	4.9555295230035465	4.842780982560464	4.683793409101543	5.449395839685353	5.3423825736832935	5.217687949517607	4.869417694472506	5.052604830934488	5.572874877117084	4.778874603685415	4.605045068796212	5.46888602087649	4.864232150837199	5.27534191838641	5.3292534892592816	4.981855866574161	4.437201697411637	4.961518598194777	4.995184140690714	4.499298036762408	4.619623329548667	5.117809505333375	4.884050630221914	4.758893369106066	5.3716352339384175	4.8159212580497535	5.386317876098548	5.8432509767701255	5.199115823846721	5.026613787468089	5.183729020191045	5.121118913268928	4.758562307716981	5.252409326983375	5.156737230327567	5.229139791940889	5.236587039583517	5.17347857223472
pos_1951	Cinoxacin	metab_1950	1.80793	-	263.063	4.634319997266124	2.5901099286349494	5.318630686897892	4.531344430501114	3.746224507268517	5.7646032093588255	4.521619479772913	3.3979965365899507	2.7763441945064096	2.7116591824867955	2.69008673769852	3.6842414810944697	4.037284019852399	4.8902322224035935	3.758033399613101	4.685817275551087	3.809889694133605	3.477636624472228	2.6860468280924743	5.032855530691527	4.413390145369587	2.5850800635209827	4.319776382077084	4.563679650230867	3.359200492925912	2.4238173642523373	4.771788215815524	4.817512699936642	3.900772271415757	5.133434053837584	4.512323778156938	3.7711375923529045	4.72041459038277	4.190009532161652	4.288003461306765	4.452750774535008	4.632298865518745	4.693698383151845	4.668384636197967	4.667128266833718
pos_1953	1-(2,5-Difluorophenyl)-3-([1,2,4]Triazolo[4,3-A]Pyridin-8-Yl)Urea	metab_1952	1.80793	-	290.08559237099996	3.79470794993965	5.255044544790848	3.803446217022824	4.668743306383921	5.367613544584461	4.6453498752943325	4.77671689393204	3.2021394216543406	4.42700545893066	4.675830583143128	2.786391714553058	5.125498686879704	5.3853190471525405	4.496879003368216	4.767673236661216	4.634134859017741	4.930165929230067	4.483608515356173	5.4332124056513456	4.688842099066117	4.907581758619823	5.001653716178874	5.330584816988456	5.222378072187031	4.598108233578572	5.284693003459421	4.187317301143759	5.064848276074069	4.650227714329048	5.383189574848001	4.891130568705541	4.875275549755873	4.240045898399798	4.8552120518591915	4.981823507757292	5.671460885452385	4.544016555243047	4.664713655050547	4.632126844723749	4.733953180441636
pos_1954	Lys-Phe	metab_1953	1.80793	-	294.181	4.751657473277203	4.853358278750243	3.9957597260822575	4.4849333490623335	5.149716835665658	5.094931240842606	5.79980386106678	4.788185853709778	4.79585302819932	5.598095973651213	5.409889983604955	4.867263746148715	4.9483194566611965	5.2473857543087865	4.701240253482623	4.460649163883777	5.418196378750888	5.290152159716435	5.582436902173346	5.642515312790594	5.0645313018397005	5.51096840689269	5.726792242946399	4.786418859667851	4.99438469283471	4.9655361067310535	4.967870901292572	4.705688942528053	5.6598787112168205	4.840426831275853	4.5139217535766445	5.615823414083869	5.288870112545943	4.9705292282382025	5.419560813494497	4.690809896317457	5.267685465400102	5.258932626734762	5.261603056270569	5.27478580534541
pos_1962	Asn Ile Gln	metab_1961	1.80793	-	374.203	3.179668701508496	3.8974199678935504	4.566923545456474	3.1910457105300516	4.6092791595909866	3.9788294034910536	5.222670907330541	3.337383430847386	5.062030183083623	5.121316513132023	5.072321315283437	4.748045666898369	4.6138889325479235	4.4179578009861125	3.8454934938899763	3.3215073674077016	5.060751646567294	4.974975157589772	5.1198766157447935	4.83800959553599	3.7355324600728883	4.979822267292344	4.691867407998954	4.1403743956081644	4.6268803963141325	3.0678085410528437	4.360748562634657	3.9046785327145024	5.46865179144992	3.5343106844096805	3.696006212383495	5.0037886635258015	4.184621656022092	4.0763907558439785	5.00547409044903	3.4115309363865105	4.7528681706056135	4.791864811937403	4.68967445301042	4.731368860518924
pos_1968	Gln Ile Gln	metab_1967	1.81327	-	388.21912737800005	2.8107085207396256	3.3941166910882408	3.0636350656629	2.822075584097778	4.5135432831146325	4.085265692872362	4.525962848981643	2.9683061023033064	4.706920696009734	5.024496493308225	4.883334810360034	3.8784888273473777	3.7092576718613035	3.7706735300818885	3.839781638906581	3.0057159374370985	4.344035249085267	3.808889741672881	4.861662594481817	4.472402772356887	3.756416218530733	4.388937349898779	4.2101091209091335	4.166068099833605	4.5633481827269575	3.120588235954564	3.867217954669243	2.803308729000476	5.399470813452751	2.945467739900669	2.934935059660668	4.293277048923408	3.7586563354874665	3.759741764516325	4.173354836849521	2.813057284366061	4.309130608190434	4.4455897427882185	4.309518311807143	4.387687230098013
pos_1983	N-(4-Aminobenzoyl)-L-Glutamic Acid	metab_1982	1.85057	-	249.084	4.668331448547439	3.980637447839257	4.381712167567197	4.967175645698333	4.171110340444833	3.2683024739229425	3.7424053594846014	4.197622513456793	2.199452222320119	2.5736636275935587	2.3761125010854527	4.338997450943989	4.054605316933592	4.980792407194075	2.3188072999032063	4.386551074562349	2.388670741585532	4.3141906279879985	2.372081395950848	2.432862053530436	2.1900450631667074	2.9338334916379787	2.3585571046899703	4.769225613275972	4.657	2.6114443316638845	4.612797536144488	5.030936887494408	3.650514345698067	5.515050563733604	4.879894014359062	3.727184609403364	3.964503566271564	4.5988003949521845	2.285523536025301	2.7038052503200904	4.456852221476663	4.516921543574294	4.5148631824959295	4.463205020151005
pos_1985	Butanoyl (2S)-2-Amino-5-(Diaminomethylideneamino)Pentanoate	metab_1984	1.86128	-	245.16053057099998	5.0434392357007445	5.82009943589876	5.136343913539559	4.7808355599086045	5.847356184372464	5.658885500497942	4.983886071194847	4.8457265529592375	3.84658341560424	5.153900978311858	2.8723047156105936	2.761402550943524	4.489763555267649	5.5496043995846165	5.3834559697648885	3.8591087472237486	5.651371015099118	4.1820352229919155	5.410631023026661	5.501518281560896	4.9397856967633	5.261058130989167	5.220618222766392	4.791001469077523	4.632316502064104	4.68402154657884	5.031982735898632	4.4563313764793495	5.059112840119567	5.1082975920005325	5.4022595651785705	4.978226004282597	5.570163862388156	4.800035610107177	4.680499786876384	5.773484690802437	5.2272820098733135	5.2322547690331245	5.237466651604443	5.230829251022809
pos_1993	2,3-Butanedione	metab_1992	1.90925	次级代谢产物的生物合成;丁酸代谢	87.0439	4.596145577408519	5.055792555840102	4.831994292354026	5.130058920856204	4.700966031513589	5.019841339295128	5.013329699523091	4.813884775227303	4.267029541264629	4.358092175065154	4.415256781544376	4.529303205585361	4.6100401412219725	4.8589718086346245	4.827243776778366	4.652821589949942	4.450895982046824	4.309995398265162	4.4866145587108655	4.4651721943671205	4.626154039363338	4.395746510641752	4.686191859872643	4.8530623040642	4.396095558356843	4.39034254053105	5.608769121650612	4.787520210255563	4.332411503523545	5.051116364697797	4.658769295957241	4.654172342848068	5.003761892310127	4.299668834581657	4.369794082084817	4.446321373584963	4.806394414096463	4.819074585715266	4.830992183910137	4.793212679647283
pos_2009	2-Aminoindan-2-Carboxylic Acid	metab_2008	1.98952	-	160.07542482600002	3.7845284241873776	3.6416612826936072	4.9494658666021465	5.022394460162077	4.194920714241963	5.249610644757248	4.492631387606257	4.5495370792450265	4.161594207403718	4.755143632088464	5.125908618463988	3.5512596250743265	3.5901734034848816	4.447825865119519	3.874139290971812	3.9760215239150045	3.001209275156665	5.594687828429767	5.340965727902202	4.569763469840937	4.1771122898966135	4.1312077456996725	5.507483390112189	4.13097279714972	3.633231651745608	2.061932250414393	4.467234904887472	4.126988669218279	4.449816151041663	4.549837968317044	4.353031564260989	5.446352044312653	6.1451356304076565	6.446345714112692	4.398290195844028	4.9781276299254005	5.330634620615883	5.331659730710896	5.335204725373528	5.3533680735428
pos_2010	(E)-3-Phenylprop-2-Enamide	metab_2009	1.99485	-	148.075	1.942285663182694	2.2789107603071246	3.9599595837404733	4.072508516194996	2.565271303365428	4.154472092261304	2.8883632668237778	3.3036602768016916	1.665671110895561	3.795733196985764	3.821200526300161	1.7308475465608737	1.6762281624931898	3.4633796843481366	1.7834188701405362	1.8271288998958783	1.8525251539474312	4.766393853814749	4.387388344043515	3.2848138477054483	2.411462139029421	1.73656228818966	4.651338487044759	2.7026757892164266	1.7442157529211293	1.5783708000980812	3.5324988573821092	2.7304999252501525	2.623701435416045	3.103048381728018	3.2300038164981983	4.589504505249256	5.360535721509272	5.66599043211801	3.022215654809451	4.047647377622034	4.453398344879005	4.472627311876848	4.490694738019059	4.505777486561152
pos_2019	3-(4-Hydroxy-5-Oxo-3-Phenyl-2H-Furan-2-Yl)Propanoic Acid	metab_2018	2.0325666666699997	-	248.07	4.249062874722672	3.8960172029981055	4.1209305724403205	3.951966238101487	3.8382432540544986	4.211026807010796	4.299302827120743	4.324083604660019	3.325788586579366	3.959560087305321	4.1020271688612935	3.617885474596057	4.1840763374927095	4.0030014465223465	4.335112455445098	2.81336890070508	4.085892243115807	3.5433249113937886	3.6719355758986207	3.4314521596625864	3.879379674575055	3.441057064738549	3.8453679324989545	3.805317494402054	4.124930879035507	3.566643292314186	2.8355823416048347	4.065914662733423	2.9070284197926552	3.9040850448252336	3.856035362951488	4.395714554915483	4.226494067316447	3.046806479283607	3.8052946403453936	3.9574478542425533	4.137265415591614	4.019782651091649	3.9629624508032095	3.9480878151976593
pos_2025	Serotonin	metab_2024	2.09143	代谢途径;化学致癌作用-受体激活;次级代谢产物的生物合成;血清素受体激动-拮抗药;TRP通道的炎症介质调节;间隙连接;胆汁分泌;cAMP信号通路;神经活性配体-受体相互作用;轴突再生;5-羟色胺能突触;味觉转导;莽草酸途径衍生生物碱的生物合成;色氨酸代谢;突触小泡循环	177.10195084400002	3.023500706604005	2.4689674251316447	1.9488771405275755	3.986366080044117	2.0025538417239264	3.137148077568811	2.5040188324694843	2.6912969064852104	4.364756887491668	3.2972285592485475	5.000620902455167	2.3574435725088745	2.1206478667707955	1.9310039394276344	1.9241844027800483	3.629439139221797	2.703805775207155	1.996354948665017	3.92331836903856	3.126909399472154	2.876404882814529	3.4228835264661472	2.8337951688180385	3.3027409696053858	3.820581811636659	2.637735712454857	2.2376619023014097	1.820670879611338	3.243965813250038	2.126721394602156	2.0204482508222825	2.700841385264501	2.47084458873626	2.1885253388983594	1.891147633678788	2.1688863705582624	3.8101885419865247	3.802115632642969	3.7492495219681774	3.816987490738169
pos_2026	Glu Ile Ser	metab_2025	2.09677	-	389.203	2.170574742884154	2.225096874753456	2.292348486021456	3.7390994985584336	4.039229291157458	2.342342795048445	4.272528127853539	2.3274826909040565	5.152895910429294	4.579773775071367	4.7799406741073085	4.624374451242733	3.604638124895442	3.2017265316281045	3.7782792314164437	4.005537596057503	4.504796281496909	4.974498394571637	4.7396208904459245	2.3814918100793196	2.13882612823952	4.552389198242217	2.94404118312824	4.066073928880607	4.710574636677872	4.170795982718547	2.6822243849624248	2.163213859938312	5.243604272961703	2.7309809962226037	3.8162771380559697	3.693957238131674	3.3806618755271503	3.7207380664301697	4.526936026055102	2.8984276769501838	4.453396351581543	4.429109686536154	4.433823654009258	4.410071836337539
pos_2030	Glycerophosphoserine	metab_2029	2.12885	-	277.079	4.387842773296121	3.914096104495445	4.794681499437211	4.183862765316617	3.9576467495389016	5.292800873421913	3.8668218461230497	3.669141274802537	2.368177050680683	2.5666896860619715	3.713265552830928	3.8669340233053573	2.78423336554606	4.5718001482625965	2.4877456699747644	4.2636989898396775	4.557570850120938	3.979431059400518	2.541097677954689	4.697197302401758	2.591354806845144	2.440223887418014	2.9431341529386765	5.292319898861417	3.5030938184228027	2.279162652965693	4.398081193454031	2.383207103001556	4.250782048432207	4.8507096657901885	4.305693167595802	3.3432259165975102	4.245701663394005	4.488421548368812	4.107544050634098	3.6801350165240736	4.3929750184065535	4.4082445121341935	4.402868782823976	4.42522463316268
pos_2036	4,6-Dihydroxy-3-Methyl-2,3-Dihydroisoindol-1-One	metab_2035	2.1716	-	162.055	3.2290189347452403	5.667157505853645	2.8222085712298246	2.984818149368164	4.524422567216142	2.2971475280427267	4.339930455199797	2.807741535793069	3.699826062367073	3.03248041678231	3.360680140764047	3.632878115301715	3.5596115315776715	2.837551754327129	3.0854044228452304	3.0750094468040188	3.2187671812718657	3.394731891837348	3.3999183234592776	3.370240729922589	3.5024861697350094	3.261794529914132	3.424947664190352	3.5398248944259096	3.779205898479868	3.2724055116140978	3.074832464821576	2.807912298614504	3.215702171789109	5.290593761486033	2.7745313470833723	3.373093997145524	3.5218045043451487	3.36074655775062	3.5946206368364284	3.386750871049456	4.195034994349105	4.212074600138097	4.2564889091142435	4.238119629083817
pos_2037	Oxypurinol	metab_2036	2.17717	-	153.04	4.652378285813938	4.690645150839818	4.909063704438687	4.83407849427484	4.895464209968222	5.164751768006966	5.3445889573526415	4.98570180237454	3.9223210413771774	4.393854906127346	4.396984786954679	4.2282336234107705	4.957976751008163	5.766665076163912	5.137298635618994	5.120293087479995	4.556124885119659	4.57801154349524	4.255697300531378	5.406003101744832	5.076120662761492	4.498408411276961	5.268306276478008	5.427519439758587	4.488356348158527	4.421241547847352	5.219072659769156	4.922927244375121	3.6617461597942316	5.504246427442831	4.830684779933919	5.323069826073512	5.316730743477545	5.854142755601907	4.182768754875419	4.848143018669821	5.126432801357796	5.108312815478988	5.101719811110093	5.136316175487483
pos_2041	Thr Leu Asp	metab_2040	2.18785	-	348.176	2.6858086658784366	4.1851486485928975	2.5964933851434457	2.4237186094024623	4.61005396900368	4.3018768746082205	5.096005839015451	3.944913015639596	5.038321141644578	4.970229151742778	4.948451176689146	4.592076545301295	4.611439915173285	4.293170630783607	4.2065649756402275	2.55382769865699	4.966730714273276	5.0255953767745485	4.758230422362285	4.267290411299625	4.284715308211734	4.813865619630024	4.664115188192956	3.601446269827552	4.882269654637546	4.39022336191582	3.61360025915557	3.894315675010612	4.843767975708341	2.546867243264294	3.6263900788288175	4.28577038211002	4.734890643688203	4.1443760931659845	5.053390146784455	2.414720963300044	4.641753734180162	4.652706695313488	4.643389124382944	4.6106681374741205
pos_2045	Ala-Leu-Oh	metab_2044	2.20915	-	311.123	3.239009741657884	4.373468054778364	3.5440497088409177	2.886826157700585	3.9641189150136777	4.175511814869214	4.065186764430893	5.923187113904135	4.015919889435876	4.5652528668147285	4.370366509413721	4.341320455505743	3.981951714345808	3.866155793000397	3.913329394309226	3.203002285460501	4.181924301139205	4.617895188099321	3.9966614870011954	4.319679142440791	3.327801321294933	4.306756789931934	3.9528638417638122	4.031366427286405	4.196676476814633	3.489256774999254	3.5627728634192017	3.37920235897771	4.42773285593318	4.426723868471344	3.467689348900412	4.4784111642774285	4.114037239028837	3.920121385692947	4.07095216827123	3.4357142534818275	4.6152933838177095	4.483021594762898	4.5369810087618525	4.603719434818705
pos_2046	Val Val Glu	metab_2045	2.2145	-	346.197	4.8601051367022645	4.63378452748729	4.898904260079452	4.174518324330111	4.604911318158568	4.8401533859042285	5.5826765043539135	5.109793202477778	4.78430038135008	5.2940690309711655	5.022644073823941	4.63240243217544	4.950925965080306	4.8683264202318615	4.505257750731512	4.615228888717434	5.199929514856766	5.212740584337807	4.954636491191387	5.5192793310054045	4.86764587510527	4.987144955147422	5.1210298411464725	3.5161556365446915	5.043889336975657	2.747587579388408	4.489039347770464	4.227305223736261	4.945667715292345	3.7692769875869216	2.983599937649264	5.635388352340058	5.200797443562758	4.4813120709759255	5.152060846349421	2.861704816645102	5.036882603540652	4.997266155653745	4.996617892429062	5.003284432277199
pos_2052	12-Hydroxystearic Acid	metab_2051	2.28425	-	283.263	5.3558417969009975	5.394754365892229	5.331980446285924	5.514304802937969	5.552155875150294	5.418437616253756	5.532465845969062	5.2835152324084085	5.345360065533503	5.310477065796482	5.531118660374359	5.401724491093671	5.409623756387154	5.259570374871372	5.530755384950348	5.298972102603839	5.5795718845979145	5.3846998167698645	5.412478963289393	5.4457682278153134	5.453597614759546	5.450467728069477	5.446921789119574	5.3777650053482295	5.29514025496999	5.35205548974248	5.101247195717041	5.530249519162284	5.4771214829834225	5.326633174546656	5.300970198995215	5.3793062647451375	5.463024898022821	5.467940995542893	5.453353196675774	5.42148021726535	5.057778946895746	5.280768622960551	5.235964761381672	5.286207075003207
pos_2057	Pyroglutamyltyrosine	metab_2056	2.3646	-	293.111	5.060320186747505	5.376624354016503	4.87256523815896	3.5752597825510977	4.3384560464957485	5.037062225554722	4.7949320595553635	4.111591843724255	4.4137013679097326	4.8882906079973685	4.848925414132985	4.612984684394597	4.566107924722466	4.636520216878587	4.435597555375341	4.540107345760795	5.0042489404194175	4.903020493099083	4.32415998263718	4.722372217173546	4.5578723262639045	4.69714089958926	4.540948099784255	4.650612333905464	4.449743356453862	3.590894395101705	4.15505014749902	3.4943614869028283	4.958794168240791	4.487512094837942	4.070561180789321	4.596990735017719	4.419147705109703	4.365330944739871	4.389275077855618	5.123878158180212	4.709836331600503	4.6929038011185344	4.697436828525747	4.738257513501653
pos_2058	Gamma-Glutamylmethionine	metab_2057	2.36993	-	279.101	4.163282361401238	5.267697104682675	4.800314569719587	5.871463709981067	5.245584014997572	5.197185752397925	4.492414579656414	4.4790035729028865	4.949835949421266	4.191443128033508	4.178339698865078	4.44172055351982	4.041163943664589	5.229484101638757	5.15026284802258	5.873886726060943	4.573659082116167	4.844339476616982	5.5374036129966555	5.226142974262724	4.528276161247412	3.6109669962756734	3.941956851050009	5.6119984456307686	4.562178219341712	4.799982333894062	5.0728290232416	5.0674722081364525	3.968952482860266	5.5992415136060565	4.7914272809240135	5.430320392258212	5.279504164093562	5.221723883236352	3.9421199845002697	4.946427558127633	5.168350786509676	5.165053413501493	5.180561325028492	5.173695350935292
pos_2060	Val-Asn-Pro	metab_2059	2.38065	-	329.182	3.9018287727698255	4.450989113860915	4.245051080438373	3.698060774922135	4.082722656105065	3.9590709351968782	4.768274247200599	4.432692260007771	4.53714810176564	4.66814922229979	4.445230340247882	4.779951022313224	4.652163995248432	4.51787355720825	3.534137164799977	3.5558688716984017	4.490170187747991	4.806731492483217	4.171550117020107	4.787951552578352	4.381425557291833	4.232731502660856	4.388906808985102	2.869693034771453	4.364831692768143	3.4617584839866016	3.88800133064932	3.0112819606020427	4.506636943158568	2.9072088593663667	2.8966772935699154	4.927792449173621	4.5414717754140845	2.9100433811831965	4.576520437583207	2.7748145862325506	4.539192632436549	4.447558296470081	4.4265663872356384	4.524318784413044
pos_2065	Asn-Ile-Asp	metab_2064	2.44372	-	361.17138791900004	3.7705334154995263	2.814730506115429	3.4667483780608817	3.3704963242634176	3.343803357541662	3.852438445316509	4.508681346136647	5.226217436648697	4.789638199934697	5.3782625048473935	5.105072457423708	4.870036050395012	4.646252290891182	3.6873989889943184	3.8990590219762717	4.804603328316126	5.34510445092923	5.424977394269712	5.0681348387095495	5.449295676297019	3.0184857316900446	6.347601121658535	5.010211345858653	3.044214161011093	4.772600501733842	2.8945656798868455	3.05215373944327	3.382351901390705	5.2991541750521565	4.92447417033442	4.009226985319842	5.352667233396742	3.7627842427557523	4.025633090653536	4.7626084449129555	2.76229811438029	5.065741877554587	5.04576180326083	5.066162808909771	5.0787152298248035
pos_2081	Libenzapril	metab_2080	2.53353	-	402.142	3.8953059863885513	4.274272482142243	2.991991013211083	3.995767524833432	4.369030766411428	4.074197308903032	3.4902831943088315	3.02726368394236	4.4128274505898935	4.146324359221351	4.12810011785226	3.971780912936376	3.9967070627214434	3.9664286846982004	4.380616654190224	3.5298670304795707	3.73762649739852	3.779191773315812	4.010998831581695	4.0249518458607785	3.707566366573873	3.485688414065493	3.5039429917434	4.06384477655636	3.928086649114344	4.257534685098362	3.731663812319264	3.5277173807800133	3.9342229745589687	3.9071753566208	3.7445809270767167	3.8281906999796362	4.138208962064539	4.122865284033769	3.6250333912768036	4.005614589420824	4.06745847815377	4.099320794248807	4.221164378594141	4.143448342492607
pos_2082	N-[3-(4-Chloroanilino)-1H-1,2,4-Triazol-5-Yl]-N'-Isopropylurea	metab_2081	2.54888	-	589.203	4.141743077621995	5.360411314453327	3.162707244744772	4.913925318594432	5.6035380259746965	5.250545960673007	4.861608345550591	3.197991143213541	5.646381277526152	5.067319967443688	5.475285099421089	5.332734047800786	4.950266728602517	5.178889771425328	5.6641499840430445	4.513102189095919	4.701101081336539	5.2441241767348465	5.096693978505262	5.098142938758909	4.391353921404478	3.0900940183388426	4.2728886344225385	5.1388265453110336	5.280826819226808	5.2927601478481066	4.875612705721165	3.926145889067087	5.184128608712771	5.273064632332057	4.789337546745808	4.935122549967208	5.265518400047213	5.463309333027839	4.692316162463111	4.956712767947227	5.054141676377616	5.088616595272587	5.152114584090692	5.181764756718223
pos_2087	5-(3-Pyridyl)-2-Hydroxytetrahydrofuran	metab_2086	2.5752833333300003	化学致癌作用-DNA加合物;细胞色素P450异生素代谢	166.086	6.857284281993753	7.283580474305707	6.785805900969285	6.987456724820478	7.500214318296459	7.2293842512022675	7.021176973409798	6.876071975392432	7.420779213367357	7.2215168751209955	7.300391501897846	7.290160432241367	7.103172477902657	7.234559827060604	7.6279244904524734	7.119356881332918	7.03471614670876	7.570318461815367	7.213579077430161	7.4995941049898205	6.888650801345644	6.656187934019908	6.921727946614713	7.347381047418102	7.651851118865798	7.4843751528761215	6.9782270516652485	6.9606708981824825	7.052528513447678	7.2658294280596625	7.056160640273907	7.433110853130679	7.321327699150594	7.342598386466785	7.119603462670157	7.282478291911378	7.279106159514575	7.290600385140951	7.280147912232996	7.284684970033449
pos_2096	Thromboxane B2	metab_2095	2.69245	花生四烯酸代谢;代谢途径;胆汁分泌;5-羟色胺能突触	409.196	5.048591943949399	5.804247476501898	5.19222867719908	4.9305621599220615	3.859690585771176	5.5619439460902536	5.2454024813479245	4.481227718912461	3.9334693611646463	4.6668022356736465	4.514961280896256	5.663752094914247	4.7629034521646565	5.199597176296231	4.814074380029691	4.671302727379458	4.689198129731095	4.0373984396030185	3.70431290556819	4.6629374821939935	4.337461462227238	2.8770140603275944	4.551812459741257	5.17593120498608	5.3576242019264315	3.2316065531408675	3.1938367131986487	6.2005973417703375	5.966524327057666	5.659175934826028	5.030579699640144	3.01727031960454	4.344087607146086	3.0404843190489204	3.739714004279998	4.151131614298094	5.0950185037745825	5.1238406423265515	5.181728136510271	5.15926979593488
pos_2098	Ser-Ile	metab_2097	2.75103	-	219.134	5.366864226841664	5.432027225901363	5.20997990657574	4.594078975373126	5.706310049246207	5.580704620274188	6.162199832943936	5.7119053317620505	6.156988020897275	6.1924150797063175	6.029877668083151	6.103283776184608	5.924878786332072	5.767815429497746	5.344637128483852	4.924559541256656	6.07967569916912	5.980827149982143	6.037407323666122	6.39234212581185	5.758881390173245	5.972428334807407	6.116161189914213	5.594426113342203	5.964298468784933	5.519697639753252	5.396700755238318	5.006728041874463	6.0844981300175585	5.262464068812308	5.1460449519465365	6.454156023841268	5.884570945179695	5.459535760206816	5.781478688479196	5.27768939210604	5.888959472786922	5.891014245737453	5.89714018396899	5.902029545552528
pos_2102	2-Methylidene-3-Oxo-4A,7,8,8A-Tetrahydro-4H-1,4-Benzoxazine-7-Carboxylic Acid	metab_2101	2.83652	-	210.076	4.091241496975161	4.99192371551149	4.685453780100247	3.8760223533976985	4.454611969877888	4.137755276778609	4.019465663541209	3.8256560240572406	2.4697350459685783	3.620843587088311	4.048143511663026	4.3187731255632436	3.979200313784717	4.577048415922417	4.446737184206033	3.6292185401048322	3.9646535478377793	4.142821123014551	3.453164083129572	3.6271535324447073	3.1775591127460685	3.636375715688157	3.873084643917216	4.247683245222682	3.4672998475270367	3.5804066999781567	4.051010212556248	4.03876718488351	3.5559573274749505	6.337950137381132	4.2746424168785735	4.002651157159308	5.098477173743666	4.472160888124376	3.762892343308737	4.9105596541721885	4.837126128730455	4.823455675351672	4.849653235723394	4.828153296224102
pos_2104	N-Methylphenylalanine	metab_2103	2.85783	-	180.102	4.163196170562629	4.9262836864232264	4.0441112185212775	3.212200004374864	4.105649377758883	4.6735256455340135	3.7838277762018686	3.783483359812668	2.939151515074398	3.15933095651998	2.382457427735362	2.78560142415918	3.50417	4.7008873718380775	3.274209719183661	4.573048019114252	4.305141847846944	2.905062813218658	3.056395435982378	3.1253342919113987	3.9626772615414034	3.0274395160485645	3.741044516751706	4.5349715873734855	3.1370954664979482	2.8930970000783924	4.986365181254256	4.306960402855686	3.041992397869617	4.753646399425093	4.609402516943381	3.7918357409119934	4.488498532905009	5.689212412279388	2.7698468150752484	3.967461140980817	4.475299251615235	4.481906239731852	4.499211938499423	4.498350831624161
pos_2117	Thr Leu Thr	metab_2116	2.94885	-	334.197	4.084589267612993	4.0455000119090965	3.214799041148911	3.10376567782498	4.0993857909329465	4.498611191676393	4.563686849378104	3.250085574999932	4.807548137062381	4.812723069932078	4.714121521989108	4.468280074925215	4.5393752037807165	4.483376235189371	3.632749259544652	3.476486122915011	4.817209022529707	4.812090252708256	4.8432661448600935	5.016969034758661	4.308651222930772	4.342601047102224	4.637280710536475	3.9870227168679513	4.5563733773108135	3.4027001597828086	4.1697774701892945	3.924236335730469	4.6699618033214385	3.3035749521950137	3.9479311215310062	4.8703645712361014	4.485865165481231	4.339030146062163	4.827769540360367	3.3021162720610313	4.510497126542238	4.5111563788778355	4.546089222450428	4.5086359999790515
pos_2135	Gln Ile	metab_2134	3.00788	-	260.16	5.161335057788162	5.078968446169926	5.053359274700568	4.400986519021796	5.237816234982812	5.370596280806191	5.9413303840907865	5.501758778625558	5.8210205956753205	6.01827843068591	6.021164355321674	5.786283169137078	5.741472362467338	5.518147041016686	5.0668239577559975	4.6650651961100325	5.926134464908848	5.697209683735636	5.8960455065293305	6.1506067999364005	5.633753326738456	5.80388384346171	5.9680618221020625	5.237192741441143	5.676778302708992	4.904132934575547	5.028738741452182	4.762695210101952	5.901817065308175	5.008091123207447	4.8489546160966865	6.152236456598697	5.835489662712315	5.4372859483125735	5.648872317061674	5.062330776865207	5.669892725320331	5.662295270183457	5.675736519156683	5.667625054023832
pos_2137	6-Methyluracil	metab_2136	3.01322	-	127.05	4.281227907866652	4.36776977902855	4.4976004512603165	4.441204830178097	4.377474282056276	4.604667278839693	5.146923958288206	4.7791111501662975	4.733912266059509	4.655404516153221	5.193936563717142	4.792841623391227	4.94046119840154	4.741651046213007	4.725619240681172	4.619552249444498	4.810180904610592	4.7489840831468015	5.194061738303163	5.115879313679349	4.7981519253912674	4.900418615189773	4.986603834284455	4.896071980786648	4.269947591117574	4.644206113383113	4.660514402254844	4.570290971511291	5.0648761274549035	4.650007482658267	4.511033697565999	4.854141799572613	4.856905167167937	4.868646632707588	4.797784078399597	4.666918427792624	4.791899919014254	4.801781294630941	4.8148274059190665	4.816959943775847
pos_2138	O1-(2,2-Dimethylpropanoyl)-2-[4-(Tert-Butyl)Phenoxy]Ethanehydroximamide	metab_2137	3.01322	-	324.227	4.217908605583852	3.97399550391142	4.771747363537761	3.9630406421786	4.047088985767094	3.896306470942181	3.9506934119161774	3.748366219674432	3.9683484708116032	4.758806325356272	3.8219055294776574	3.8406637503465815	4.033018107122748	3.8347307560272297	3.9922527487316315	3.952216557184239	4.296901329497845	3.8412022478551537	3.8714016452512885	5.237889597181759	4.062753282732984	4.040333834994429	4.6326247213875416	3.9741141465279535	5.366083035273445	4.143648366302105	3.6375587066743607	4.0347703182200245	4.530308038420365	3.896619839042992	3.803002784342868	4.1402246917962335	4.342698573601056	3.9421344060276233	4.62495116673604	4.971445673270967	4.309303731244127	4.3484385322647565	4.376694188676937	4.379483462736782
pos_2140	Val Val Thr	metab_2139	3.01857	-	318.202	5.211949068597848	4.788428415255987	5.035160934666474	2.9007769816246136	4.77606142137233	5.121545166985685	5.973154866365221	5.283751615654974	5.251977672287857	5.537621992796134	5.2767709818283866	4.953305580319358	5.321699091390508	5.535434614088214	4.5410898532979385	4.362248123843671	5.5945977033670165	5.332607449204108	5.392359040606598	5.763654054165947	5.431821300608092	5.324815072260713	5.713015824130912	4.236429520763311	5.0213829609159255	3.10175948785065	5.090115760067273	4.596756922205736	5.462384815420908	4.031584558635188	4.371138042297306	5.721552376993477	5.774840458504995	4.602279593304059	5.54960537321772	2.962621287483123	5.302089090382946	5.317671333472255	5.332815854179664	5.3034726316045395
pos_2141	Alpha-Mangostin	metab_2140	3.01857	-	411.183	2.972556247351778	4.861876870486053	4.027267404233495	5.8788359290415775	5.311337058126032	1.8756192515919048	3.9888367125654733	4.34727077069671	3.382299456298268	3.7335112280754608	3.802405691137529	4.175467968909309	2.9102724220663148	3.773733970836485	4.809990835171289	6.636205160950468	4.704052394063501	4.046757008687173	5.625414729483894	3.0277294119930898	5.232641464524144	3.0979260317524875	5.151792723027093	3.884192839273824	3.559483791919545	5.731245257906617	4.625956335634243	5.293161069977464	4.391679359124332	3.5424172592693615	4.527864048017747	3.6905151672534418	6.218427848525662	5.697958927827308	5.119862167370769	2.6399398341647347	5.36322422297758	5.412429995642515	5.421093608814126	5.413711076741227
pos_2149	N-(2,5-Dimethylphenyl)-2-(5-Pyrazin-2-Yl-1,3,4-Oxadiazol-2-Yl)Acetamide	metab_2148	3.04528	-	310.128	3.5458828611560174	4.101929263009313	3.921687480547357	3.8687897126530832	3.5523942872549314	4.028655034353255	4.252922781864704	3.939739549001591	5.3832996440902985	4.402047531200057	6.015851551788603	5.889919086107402	3.2595157982276297	4.201353002734061	3.9328215745221113	4.30094344471448	4.611714286086102	5.696977632263253	4.819818085471093	4.4748556183340495	3.5053234899173487	3.7262398704986532	3.758364079023383	3.5433561932070656	5.189071827621646	3.0866702884262787	4.791531594880079	3.5404290454464182	4.953913396138742	4.525936353452813	4.319631124014977	3.8893782369875187	4.411027692262328	4.191943152579326	3.6978558116046	4.109596144105985	5.014146670020157	4.989406228965535	4.9959478212457125	5.0101833548895875
pos_2151	Methyl 2-[(2,3-Dihydroxybenzoyl)Amino]-3-Hydroxypropanoate	metab_2150	3.05065	-	256.08121497400003	4.1738023297968345	4.2866346236369735	3.735838318836962	3.8250502095895498	3.5606446367834907	4.348243147804044	3.3111092169194127	4.1763774508326295	3.3982167298649597	4.644449178215786	4.245703723200475	4.1210082459656565	3.90107297243134	4.799633542187174	3.7904506055901184	4.148579670655992	4.7623879703751175	2.5294494874102798	2.522294135710608	3.4540362015864425	3.9989344903920734	2.6988749621150516	4.172120302765153	4.458499785755147	3.943177877440065	2.380477900218288	4.153355787214706	4.278894698753526	4.4123027702649145	4.3943213930867975	4.789713459090373	2.898487320273162	3.8633397998484607	4.978621004126072	3.2953404993437614	4.0211366402023705	4.278413156026433	4.295680136978281	4.324325979870372	4.297606497753821
pos_2155	5-Amino-3-(4-Methoxyphenyl)-5-Oxopentanoic Acid	metab_2154	3.06133	-	238.107	3.553698585353635	3.5698875404954538	4.053615768602024	3.6849314311212615	1.471525807377682	4.108091282726277	4.156815468231927	2.984577242395752	3.200104719767427	4.249350909501352	4.134738079607504	3.9819124246926214	3.1884412796145942	3.014401843550968	4.4383860356544975	3.7525947816580514	4.269650725454424	3.7868873925555535	4.161176860099457	2.730274871538995	2.3947215127825032	3.3835923987937435	2.993503411678042	4.008592429877779	4.233859725170835	2.8677096276635132	4.658504121798884	3.327383195173596	4.0154223237772095	4.1756390203421985	5.782192639170708	3.6719791351270152	3.4566300364746945	3.74355510440945	2.4396128939884747	4.632380393357921	4.5101276632788725	4.5150743995243525	4.46067581039198	4.497082354071932
pos_2159	Methyl 3-Methyl-1-Butenyl Disulfide	metab_2158	3.0667	-	166.07208080700002	1.9712531165246272	2.1901413476490776	3.1771980453531063	1.982517483997338	2.4379506262750392	2.1424591254055034	3.901506368641101	3.1559154448145272	3.0240139530524	2.5702395734183328	3.797334430225672	3.812932072064812	3.622652427706238	3.1966000048786705	3.423763395016029	2.1566371649938745	3.367337920070385	3.2766678479847364	3.15359657858888	3.979174452515328	3.7767706425475533	3.1692944258612163	4.049446797595682	3.747050630316983	2.637625815595309	3.071983282646072	2.3588720074079923	3.054517050565985	3.3722330636453868	2.2101182136264237	2.8674318028744152	3.8258957738212382	3.2974057723477697	2.1077665099637226	2.196553662834402	3.86685008971888	3.4171776208370703	3.395026681949478	3.436836050014933	3.3966734461457486
pos_2163	Suspensolide F	metab_2162	3.0667	-	496.24083359599996	2.9516086945791806	1.3229841497533446	4.278142083527668	1.281667007260893	4.029173821936472	3.6696470140929	1.3747880597933966	6.48216576382622	4.79547736714791	4.747373793065315	4.811936860154316	5.188434591596206	4.131480303663756	2.5560425505949564	4.171452393730241	2.551518376257873	4.343956030869235	5.474195501962688	3.2632242526191417	5.485537256876314	3.0878975218883102	4.9219729664993865	3.69444966270852	2.010078187231009	4.741585639823756	4.583404014081646	1.4287096054956392	3.942235718089836	4.866229338745655	1.3995626524871594	1.3894430236982571	4.1412006830610295	1.3675429161787147	1.402287933381612	4.710024730146916	1.2731118349443475	4.987289136093497	5.017842640470335	5.014873480888829	4.986119134964542
pos_2165	Diosmin	metab_2164	3.0667	-	613.151	4.197319622929282	3.7386453089532568	3.3801134429029602	4.0317391587529405	4.348994516004215	3.4104088880638104	5.0713370191898735	3.1922487506959576	3.426990460343281	3.994515882695176	5.610693926277155	4.9485988606174685	4.192873687306795	3.905121342690923	4.584715198442468	4.501012538148894	5.380103224446418	4.917385401794423	3.6695624418288566	4.138187253629334	3.9494240551086333	3.282509618968572	3.976555927451344	3.8529994864750887	4.440686905600408	4.295552179821302	3.1996958072806434	3.027164286770996	5.056646539221316	3.463071460868544	3.158862658867209	4.435015014666838	4.771886856780767	3.1722363237938405	4.912754465346202	4.740330525643107	4.627626996264122	4.547209711690755	4.620701659375138	4.611291534654423
pos_2169	4-Aminophenylmannoside	metab_2168	3.07198	-	272.113	0.5266759974157875	3.4267987366433497	3.1995484530535623	3.6136161552878687	1.926972562567972	3.713593829611893	2.698635286898254	5.60024663151806	0.004874925150044622	2.187706867028775	3.6553904077061854	3.11911002190212	0.004996824157544564	3.3997001875795765	0.006415258641547452	3.793098403835393	3.573996279548412	2.0927144768516035	0.9112351104440194	2.0995961443529847	2.5255744127997297	2.1269173002533748	1.2992440518566435	4.247546762058993	2.5432668793725717	2.375054755614027	4.326647275374515	3.5127663716277318	2.8458665788316257	4.1302047657097045	3.178476311996508	0.24015756071793304	0.006474538853227455	3.8225836482113	0.00594292535598084	3.089526607276984	4.06175824723259	4.028587243651312	4.046279919257319	4.050794055171297
pos_2170	3-[4-Hydroxy-5-(Hydroxymethyl)Oxolan-2-Yl]Pyrimido[1,2-A]Purin-10-One	metab_2169	3.07198	-	304.101	3.6389182443959847	3.78782359737077	4.325854278750863	3.793725335116484	3.890704610989893	3.3687321813989537	4.9734984657400965	4.608799679593172	3.908272605092331	4.156276073775056	4.839734420895878	5.100373927803527	4.886413038701488	4.383870066486983	4.51330661267265	2.3868635954254143	4.500089253451001	4.542965401208535	4.638130310128608	5.131614183571611	5.097500906846443	4.448009390342002	5.356513239688262	5.002890761111399	3.8194070405477363	4.331631147473094	3.832495098581908	4.415756061875314	4.57449651442254	3.84902389620795	4.268385889835724	5.12019223411103	4.506445053312018	3.3284133074472764	4.070072958496792	5.04515339875058	4.657245762844151	4.62417003647195	4.600598864079216	4.670992435459041
pos_2171	2-[1-(4-Methoxybenzoyl)Piperidin-4-Yl]-6-Thiophen-3-Ylpyridazin-3-One	metab_2170	3.07198	-	396.14	2.7699615363740486	4.339584061113453	4.192400128102811	4.453083323063959	4.482047285100956	4.5430284235540945	3.0422226866376034	3.8575759533932112	3.720756054370935	4.368360837144185	3.646666721639081	3.4934067542333587	3.9771884150259984	4.492194931025762	3.8461646706291	4.660765069506546	3.719017840048594	4.3575594716900525	4.100631082067164	3.744442311417541	3.763915089055041	3.987228468469347	3.600179339479552	4.214620819526918	3.81515220394968	2.861784493072279	4.524523268106928	4.090490180019591	3.0210050982383745	4.316313821744677	4.094866786200493	4.456559821192767	4.321918702415703	4.716041253219966	3.974437471728227	3.820130930584959	4.076806885269159	4.191138744764984	4.267932822935923	4.133110308269403
pos_2186	3-Methoxy-4,5-Methylenedioxy-N-Methylamphetamine	metab_2185	3.0827	-	224.12711357900002	4.7567392656452565	3.284184530309852	4.390491627466671	2.297800994962171	2.563687586333227	5.005639700592621	4.343373077391699	4.34904196717137	3.4805248094753787	3.5089972935097244	4.323062456509219	3.9389992615905567	4.055112953432442	4.4875055866959785	3.838723486627233	2.6329794510758773	3.7328158384620247	4.05939710219572	3.964838320428387	4.703168330843992	4.039921905216148	2.336058592492624	4.355422893188785	3.8793521186012847	4.65896809548399	2.1751898126078983	4.486762896216584	4.193075995275673	3.85676213459776	4.749387147505551	4.350783014496948	3.872633393816853	4.000841639502078	4.332647868200216	3.467656460445174	4.416879917385623	4.24235729008769	4.276795015715972	4.325592704073765	4.313755226123576
pos_2190	His Phe Gln Asp	metab_2189	3.0827	-	546.228	3.0239036489130413	5.482821358482286	5.282015827389058	3.7351075877223017	3.3803656758121363	3.3664561125980037	4.571518388078405	5.975758729642148	3.7914959593074387	3.8720534638674176	3.8736038711082825	3.964565172151264	3.3940282997623337	4.848305980648721	4.621564800500011	3.6556386274125368	3.1914596219403033	4.404453651204918	4.309920357516914	3.4474910586443825	4.2406030818643705	5.84450925161596	4.52119904754079	4.902374086595462	3.8161977057943455	3.3302381421603053	3.6239669844414513	3.0164993734605567	4.288401075223897	4.6459802773677765	4.097959779819519	3.4284226824448427	4.5036377156056275	3.1615685276026566	4.0247968174015005	4.364515417916223	4.850926014493238	4.826099958768932	4.789868564391308	4.782896872412015
pos_2195	2-Cyano-N-(Oxolan-2-Ylmethyl)Acetamide	metab_2194	3.08805	-	169.097	4.738073004366715	3.9216530223567743	4.305905544252608	4.028716434863137	4.116786167331516	3.9245450988677617	4.286450173183189	4.630515152039647	3.70758728706034	3.625478272735595	3.749926099224693	4.134096827689132	4.457228286296068	5.1113262514320885	3.9602490920454487	3.6721630320899417	3.7980405433387903	3.8374596724799006	3.750720596301053	3.9224767530977838	4.0054201714343485	3.828957034602477	3.8037046269168417	5.164955452651153	4.801999668791111	4.027052830280796	3.7346670772608666	5.015241255275756	3.8403901775719667	4.925202884838159	4.888935049164412	4.134012730059381	4.240778127813158	3.749042192200564	3.8301257702586367	3.941795836692922	4.4338054639376105	4.429702392666656	4.450937981826362	4.444629592712152
pos_2210	Acarviosin	metab_2209	3.09367	-	368.193	3.7833539600653134	3.968174445026672	3.020006221077207	4.138776153608228	2.6585464903374896	4.582039386617668	4.936973861009571	3.2615965903839506	3.9056271504917413	4.135610209585539	3.976877542738903	1.4816106299311411	3.758556883661384	3.841851645015911	3.786465959260673	4.5373637397552855	4.0900087772604286	3.5176702418679286	2.7307045602941065	2.8238549026230224	1.5942288363490742	1.487242027699103	3.561844161351305	3.9777850294845463	4.0122476658382	3.4409674988762884	4.3030734609962895	4.1252775976056055	4.291045187375633	4.5850893820630665	4.17253411836011	4.143328506027161	1.5373616254045528	4.612037023238732	1.5010208075664118	4.6538750948793215	4.162955115162271	4.064230825436917	4.1043946071675625	4.200760721411674
pos_2221	Thr Leu Gly	metab_2220	3.10432	-	290.171	4.847236436632032	4.82040877444526	4.727417726828349	4.331874623689329	5.029497035421954	5.006923023678317	5.4600125021998025	4.734201409196149	5.361064457849019	5.3914301880245485	5.328646850438386	5.164747559169982	5.2555940399332925	5.211205526134523	4.886220124970087	4.917343798769687	5.3694672391244405	5.382093182997752	5.323137651330289	5.3532137272286615	4.872380751183603	5.113800505834698	5.062646543887624	4.724883175553004	5.202870987463705	4.8672126437078465	4.806664463111255	4.712762040705363	5.286466769306301	4.771315748677655	4.5040990109372725	5.477110591411657	5.2531578650597615	5.197372105667489	5.377712498524944	4.605206099459894	5.116037142946121	5.1045199947078945	5.133855959421052	5.121645927725943
pos_2225	Ser-Leu	metab_2224	3.10965	-	219.13370976099998	5.282605356991444	5.4061772227527465	5.195969718081948	4.816783123455782	5.720964199167399	5.59233470077572	5.78458829139081	5.057989441478132	5.561124590762876	5.834797228004597	5.7285854503256735	5.551862085451994	5.7107142109215925	5.449552221101521	5.465782473815284	4.7831770285320365	5.579521333193688	5.601116800435472	5.717325123546744	5.7837883922304805	5.2366998429130325	5.82470567334872	5.7184750924373375	5.411730682639182	5.583741241081992	5.580403000290034	5.142943885183334	4.9831358058100585	5.856832447081714	5.04262588985551	5.030317164432451	6.050839101386488	5.538966373224183	5.429149089618539	5.4311261665515005	5.337203471255783	5.55475625327403	5.546584015857809	5.562144254106853	5.560133584741021
pos_2227	N-Fructosyl Phenylalanine	metab_2226	3.10965	-	328.13878900599997	4.0772467382582125	4.669857827458314	4.407573236485048	4.583264485815908	3.279015853424136	4.9011136701997176	4.6949753576407085	4.2838395913737335	5.758548625577736	5.112556474710912	6.330692412562055	6.21700603459604	3.869028094002533	4.685757773679452	4.9255312645431895	4.805700372280212	5.22697	6.007573951229952	5.345470051437356	5.305868917560085	3.4177714160883403	4.50343834530689	3.936581258111153	4.362722754970103	5.634975561226139	3.4104910478275525	4.4643588289882326	4.2480714904460575	5.490545630021996	5.016152698631808	4.513371285393154	4.184160199313926	4.552136403755828	4.4784762971835175	4.2236306588280215	5.030233274643707	5.380887747710725	5.365842724717117	5.371228735695883	5.369824005179393
pos_2238	Val Asn Val	metab_2237	3.11495	-	331.197	3.830584468557837	3.8111050006436002	4.2383955722401785	4.375819919281808	4.385126383324051	4.934623131259405	4.889332469691256	4.79792131007449	4.1007362522109645	4.299529207295952	5.156041503321334	3.384465730816405	3.941743926664728	5.105160212566759	3.68023394516096	5.051493829163199	4.3434287084214	4.680012650800653	5.0167528935922325	4.507046413583062	4.231997001035232	4.529689444017159	4.412840049691707	4.490119295532104	4.1026215015541325	3.9650945684112697	4.762803619780108	4.507426407869739	4.764673599454967	5.190825806092931	4.461612298876664	4.378000243872026	4.2265011289641405	4.664363421830021	4.361722574052038	3.622948781161372	4.677314550556585	4.649754044065056	4.675007124894158	4.670302889348236
pos_2245	Ile Val Gly	metab_2244	3.12025	-	288.192	4.739792394820904	4.3007280473877225	4.778613854874635	2.7406658943881643	4.295401804121284	5.002423140026021	5.553464027458074	4.854382695042194	5.062306828131621	5.058077085048903	4.828100826514799	4.822913414236118	5.024240637413006	5.0546432879483065	4.0993862843608415	4.0029046407006685	5.07671679145757	4.915111078109454	4.716220568604694	5.2069287728530576	4.876499701280176	4.8999083755315125	5.064796326078016	3.5875590553392542	4.504090873311458	2.400336765957304	4.309409893121615	4.171174606297658	4.9773344471912315	3.305063097668934	3.757477319512042	5.2769044494735216	5.1614361770619785	3.550580492721717	5.043447752861399	2.5455719215537163	4.856668834247675	4.807571465823116	4.853815307517384	4.856402503581919
pos_2248	2-Amino-4-Oxo-4-Alpha-Hydroxy-6-(Erythro-1',2',3'-Trihydroxypropyl)-5,6,7,8-Tetrahydroxypterin	metab_2247	3.12025	-	385.11	4.4060444585479495	4.231258219497168	5.079936578267729	5.21088428987795	3.5096038141579906	6.1703420232757935	3.7387091253473432	5.1604025401116775	2.9749200920288152	4.434171337941409	4.090308709933296	3.7863232391750317	3.0563514301552845	4.028646489843696	4.1696654354543545	5.280153139486532	4.620819390225024	2.664303809792219	4.2957960020063775	4.1067211235991365	4.007581126359423	3.1806981598548947	4.509055141056878	5.0419737984441575	4.104866242304272	3.2396402439073886	6.255457865992786	4.415167376328975	3.665473970588909	4.783051743030374	4.099866368580416	4.9094957415228135	4.011071462707593	5.104374860808666	3.5089456345599648	4.995050207033658	5.147889520189437	5.159973350568966	5.160136739118703	5.121285228340095
pos_2260	Etiracetam	metab_2259	3.1309333333300002	-	171.11261912700002	5.010052216051697	5.130807805482407	4.905241188734253	4.689973122337171	5.227874580958602	5.115234170696193	5.356024756396544	5.377388210946556	5.271835528547502	5.387740621947733	5.347900286999447	5.355776830589575	5.38661477799201	5.425486968962486	5.203599137890271	4.677154855729492	5.4157582934929644	5.436206269985386	5.166408021229136	5.455140864248947	5.189710277406473	5.186370673799208	5.280919065833132	4.836727874877742	5.541242158372331	4.7596159783572665	5.08403069581677	4.886071294627814	5.163946812450384	4.712663347109221	4.910484554324642	5.7192261662201975	5.600460554537387	4.9178151624828805	5.3701295252426835	4.549946460618118	5.256969306693619	5.247171123615725	5.265913419200062	5.256537221120942
pos_2261	Gly-Ile	metab_2260	3.1309333333300002	-	189.123	5.754169924517147	5.8338110667435465	5.685802441708836	5.260718737670829	5.924895948410685	5.5740433713245165	5.907586370565356	6.0016671952881095	5.908336133546379	6.117728735192562	6.091100220729703	6.146967346648908	6.126875717264719	6.242701120647802	5.960882119122803	5.3302485110051725	6.1376357597257805	6.166635196538127	5.777331099585815	6.268397005406633	5.945927043739022	5.804871479588503	6.014666037613843	5.603927991806931	6.350324694763146	5.604831447139978	5.773823873062741	5.440923017334349	5.767745133066244	5.189770545289632	5.663358539523972	6.602369602025927	6.3970476652839645	5.663918403939685	6.053080355209771	5.385293665460239	5.9914239798585305	5.978554722461048	5.9920999716494725	5.997409473050902
pos_2266	Val Tyr Asp	metab_2265	3.1309333333300002	-	396.176	4.227120094150004	4.5623318419849666	3.9870124881117714	3.2853257744986384	4.388201549757538	4.21303280411673	4.9960748398850505	4.332846857278449	4.479067659119731	4.810673809115874	4.753618589686627	3.9032969918521694	4.7352141634055185	4.638523933414496	4.221728999627448	3.9003816514296186	4.667685752179437	4.850766073962699	4.8458230361820185	4.535781975870815	4.297860454210923	4.685735158856659	4.620835160785628	3.977266527010368	4.267927861618617	2.1994602442239892	4.159130103621806	4.05176593007669	4.853597875688346	4.236509921502141	4.310235410231049	4.556611074773546	4.722047992503387	4.427664652308189	4.712316148910992	3.466661489475708	4.454302539992692	4.459678821581108	4.453723692089292	4.406879329451784
pos_2273	Val-Pro-Pro	metab_2272	3.1363	-	312.191	4.994029602169537	2.897516028877206	3.6734274327587686	3.078774598707416	3.094053425707784	4.2345778721160485	4.964079187535783	3.000331901000517	2.8202479989795792	4.060601322050196	4.457308183008789	4.389338779423899	4.667901298690987	3.603220954652716	2.9401073990376085	3.1596615488639306	4.921160574959589	5.1304866224725965	4.987847493378734	3.8967646394363378	5.309972012619284	5.090179637229356	5.285894794114356	3.1829957113996965	2.9096404159807783	3.6189651156214633	4.137039195231275	4.297922386657013	3.67514782035016	4.089541489409192	3.391413470481361	4.685958587044731	5.0158060004651785	3.850420874038688	4.895851119348972	3.2877073356367172	4.566054136636807	4.5458107143657465	4.569362106410053	4.564309325522288
pos_2274	Pinthunamide	metab_2273	3.1363	-	332.14877875900004	4.302936697759102	4.683380990126147	3.9035711180596224	3.9193099890894953	1.6213645542851574	4.471805157524394	3.3411856467150254	3.383515658318306	1.5006298393378334	1.6947529450759309	2.866333884229774	4.184447039896527	3.0016472073233653	4.191430362567853	3.8502950782511234	4.874114800744602	4.164952585083446	4.326356616141051	3.400718728408417	3.0567544871334977	3.280885926845248	3.1362661359405064	3.0824238617540667	4.328000218721109	3.8256845316832973	2.787326953824873	3.7642571289127815	4.294648910567779	3.352439238946098	4.546017816291286	3.687816901394188	1.7080337578687494	1.6212516670279007	4.941438025038472	1.5847118397455249	3.931182073814388	4.1055443229340405	4.0407751986836224	3.9621873618056016	4.037056567238017
pos_2277	3-Aminosalicylic Acid	metab_2276	3.14163	-	154.05	3.7637403237247207	4.173494713565555	4.411920194497366	4.761307146469231	4.770614468278773	3.815110161688197	2.9489642840389814	3.6144273759372854	2.074130174807373	3.059420581687064	2.2504816634744533	3.054132908285073	4.0415501944738885	3.7112746465565536	5.149554421719555	4.6093044752832695	2.456137599823545	2.2658037023065267	3.071192012577641	2.307155829534211	4.023170328981455	4.263107065555492	4.3624737972254986	4.2011506285243785	3.0421296292116433	3.3813106271043893	4.880154520657016	4.052987810785112	2.3831696994551157	4.396489787066184	3.6770793045319214	3.9427815784525317	3.12436840601421	4.335057746991321	3.7693847272815333	4.879662353821992	4.273323247012187	4.233094200924154	4.2567214651487255	4.2714538779726805
pos_2279	Spermic Acid 2	metab_2278	3.14163	-	233.149	5.648623300014358	5.7222480138688345	5.187662884752479	5.052820674486452	6.001849221532714	6.003005900078857	6.249260365271454	5.988135429867027	6.254940398454294	6.5641916407039576	6.437232370919423	6.294041047800442	6.091038931949584	6.1468980078175495	5.6766593382983	5.371002366600091	6.252536192617724	6.253572437025388	5.7897096447688305	6.602053893099253	6.065471291251378	6.310736878111055	6.2970974024725	5.904632714561527	6.33003667073434	5.704743726799004	5.893089741066473	5.513162118394353	6.234504866412419	5.673411539739418	5.584857639114166	6.47807784896523	6.109427935130039	5.936630405348812	5.830875504538715	5.548370575639764	6.11391207830262	6.100064764308482	6.123174543094968	6.1138499120960565
pos_2280	Asn Leu	metab_2279	3.14163	-	246.145	4.926686760141156	5.003776443831812	4.914630946614007	4.509470064269548	5.255478299938515	4.984766264172708	5.213530520727539	4.725342247122807	5.009415749031378	5.288530876757008	5.135013414225488	5.016592064243769	4.982016009499152	5.105523539438244	5.109730503672293	5.133613813430791	5.25936074581991	5.343960109669683	5.3625367396814925	5.194426473046861	4.816953308256747	5.160222454356172	5.105362034892584	4.964558547323663	5.136157276088088	4.779155175989089	4.880774426890595	4.664460881960329	5.192818098330561	4.940391964701309	4.650304507230032	5.450496615522231	5.11682145751058	5.6314088501339015	5.061289097880796	4.884774142782535	5.059793025972788	5.075883172960164	5.10079839022022	5.069343307429984
pos_2286	Phe Asp Ala Glu	metab_2285	3.14163	-	481.189	4.933744438792137	6.609106986250037	5.694759393296738	6.235206854911403	4.211925266568897	4.162158020728092	4.983722322940709	5.510975359547368	5.5085061776896165	5.800518496058952	5.315402538467722	5.885291397288121	5.28720649434261	5.20433043980103	3.5100251343948097	4.700483025826104	5.370611171815017	5.206967369904011	5.28674192823431	4.156285668370979	4.761443854404483	6.192202413509812	3.760244576587765	5.419427328573551	6.8992916849915815	4.186112388091128	6.0902446161529875	6.357486414422634	4.249399122256542	4.331806106423453	5.640350159160152	6.257110342399622	6.965337449978418	6.346012717109897	6.465190912183963	5.262241826384587	6.025509691459099	6.011216552833616	6.027314870757269	6.0088824100475575
pos_2308	Aucubin	metab_2307	3.15228	-	311.11	4.8363508315720605	4.8003175344843445	4.787252087713429	4.172511352216013	2.631379106172444	3.0727453527261583	1.5372539566074481	3.6016961276114867	2.5979005351479514	3.4807339091606897	2.0062225701456438	4.411557900988459	2.097302565349973	3.662620061469232	3.8228620074012456	4.928965895304646	3.6885762076832975	4.476560509601732	2.4158790808636224	2.8326192511926034	3.323610633178803	0.3810886794890752	3.045753959795192	3.9082854611695375	3.6379784230189913	2.5996822085784785	3.244411839927542	3.5238050136541763	1.9741913727002445	3.7124716207032455	3.9004131592405953	2.9872531099126305	2.6958823738444906	2.7670733049727767	1.9044243485836347	3.5119193872035424	4.0988908939879165	4.100763397150499	4.170976829083374	4.039945721821509
pos_2317	Ala Ile Glu	metab_2316	3.15763	-	332.181	4.6714423996898615	4.5366848086387135	4.8578390623203225	4.323970745700759	4.761119796120076	4.744920473447666	5.642364920511744	4.840664361785092	5.394693769801762	5.412130305360203	5.363834960852381	5.097123719912185	5.111238656489975	4.737453053921175	4.790350359606813	4.139159556590794	5.455924190158008	5.429402502948267	5.4577318778364265	5.133299210129712	4.931170789236608	5.3211916807322535	5.092019989378055	4.401398856037772	5.198671023256772	4.198797088412944	4.463274021998124	4.7226389187591815	5.440195703218029	4.3400156857405285	4.5625773237969804	5.23717696301355	5.181253280642816	4.730571104915178	5.48384932476282	3.7950890523227616	5.096708993737667	5.102629945806076	5.127060707688019	5.093594700701715
pos_2318	Gln Ile Thr	metab_2317	3.15763	-	361.208	4.1956253594753745	4.470099091006378	3.965634007036277	3.7241184933168	4.803576744401148	4.719472878519436	5.078878055794523	4.369282115999054	5.022577741506625	5.063988957421167	5.074145220551426	4.706391699312616	4.822659310907466	4.751382670692004	4.412085877560274	4.129829764702657	4.98679377130221	4.752147348762877	5.203715427263008	5.1689384750898935	4.62646400164829	4.849126142338979	4.993644856824637	4.733081595722768	4.64070826625517	4.390425483726802	4.572517162220384	4.960544763395536	5.061153266084923	4.789703569095832	4.199426733445457	5.46138892324122	4.853452390252109	5.4697804297893535	4.9442120254178095	5.351968141805977	4.865052835992388	4.894269506357801	4.918622961675626	4.8815859781954725
pos_2325	Asp-Leu	metab_2324	3.16298	-	247.12858969099997	5.394322364486018	5.071887490088006	4.802847145946092	4.239034894762965	5.773027192443262	5.157732556439028	5.293713168297027	5.244428686494369	5.734804748143003	5.732861389121879	5.284638019303904	6.209293067028023	5.9340608663850185	4.751689846862348	5.7700571531508205	4.614263788914653	5.863821693933174	5.977216830330387	5.4943456447917365	6.082346464335343	5.792541713303796	5.708060162605943	5.997701740560509	5.3874034104906485	6.188655654793607	5.748405506716281	4.654236251437818	5.212964388070182	5.774829225110213	4.75425986976672	5.569035311662988	6.041200396130412	5.824364736408522	4.927543632395313	5.73495117882792	5.487551804797668	5.674457367780813	5.6623793449395565	5.683290551445353	5.670016141963068
pos_2335	5-(2-Methylpropyl)-3,6-Dioxo-2-Piperazinepropanoic Acid	metab_2334	3.16833	-	243.13365870400003	5.822826432769589	5.796803309570526	5.6137877623204195	4.910135311881849	6.167432725142892	5.744160253884632	6.0375023835731865	5.935178610855602	6.275223951118318	6.442900292484031	6.338043605391443	6.383494041295114	6.2200032146905375	5.865555216207205	6.128969459679299	5.269769523504691	6.381568130420876	6.351283727563096	5.921392708496941	6.539044404490923	6.02334214844934	6.1437683554457925	6.197472493660968	5.8593353198619225	6.490798028206308	5.908583214898338	5.350360985584998	5.5240657882742665	6.255625042610324	5.4392887198480055	5.777186380175598	6.376948328033793	6.232944082148303	5.776414899469724	5.999557592514894	5.6213915049978205	6.102376160365398	6.091094193102343	6.1114692843875575	6.109233172541022
pos_2336	Glu-Ile	metab_2335	3.16833	-	261.144	5.5858879745094105	5.4637995006231606	5.293183378867228	4.957515034274435	5.883239474990531	5.7573299687068475	5.7281046571835645	5.731094200121078	5.965248127242402	6.1693436885777135	6.0128800003244125	6.078697878030416	5.927791757523633	5.7716806198232575	5.868567752903534	4.917676388858204	6.09215934038397	6.136544370535369	5.492007361269301	6.2533691537544644	5.722027365504139	5.860763879086383	5.8759834349857485	5.5650103851556185	6.229427260203066	5.619997928407125	5.338551827400949	5.217533211798791	5.948938185300218	5.1071919616672	5.503323791949918	6.1224179848033895	5.9539590991621125	5.479230174328191	5.7037074916517625	5.222393438422494	5.835899977517582	5.825613389431362	5.846948212950043	5.839326836627222
pos_2337	Val Pro Gly	metab_2336	3.16833	-	272.16	4.903244671315716	4.7608029707165525	5.537233432599387	4.415655695650269	4.967059358582212	4.987727670319809	5.456496607186669	6.0640735327862325	5.319240338139653	5.485379378480989	5.316863401314683	5.678694578946378	5.329437981568158	5.2050767097528015	5.174000697911548	4.6153807637228965	5.4042587158948265	5.573659292870014	5.381806202704391	5.656058110819522	5.095227331481432	5.3901854843819095	5.445555776197286	4.751621646335051	5.44356647713505	4.301430347538143	4.957665836695528	4.860309442456298	5.2696560245367925	4.633606604891956	4.865571916175325	5.5366415078740285	5.358113695039002	4.817658792229343	5.359343219970988	4.2855477855685065	5.3446486610483515	5.340531975670882	5.3608124232859895	5.3516517808803625
pos_2341	Tyr Gln Asn	metab_2340	3.16833	-	424.181	2.159104446729605	3.332162605058907	3.0899359346658835	2.1704109801943354	3.45958998483866	3.2449619264658565	3.585463481467837	4.345670571317884	3.569238842886933	3.5970141301160137	3.8579916811841657	2.822557164730647	3.2783105480454937	3.739912750794089	3.480838365225274	2.6096802356996363	3.78471771495172	3.7747936930507775	3.842020333281911	3.709995775852768	2.97435632417443	3.348941599714232	3.2275189840116427	2.856037355020973	3.331665319051345	3.5671724765538766	2.3234045460639083	3.368807277408677	3.639786151042971	3.9069183676744528	2.81510812572667	5.358071132660012	2.8653372826625483	2.8323378372870502	3.7029057385623294	2.8915326499494536	3.7939298274665485	3.870903486729609	3.6901960531015847	3.5981329593910485
pos_2346	2,4-Thiazolidinedicarboxylic Acid, 2-Methyl-	metab_2345	3.17395	-	192.032	2.9740671509343968	4.241521847832853	3.657284736999204	4.357735646607901	4.503254255151737	4.016722537592774	3.130713988086054	3.7458455171088767	2.2820463142812804	3.1992682730131428	2.5038558580210784	3.7585324713519856	2.8862296496380493	4.173725694734178	3.664526779863991	3.7818769588861567	3.6232426111217584	3.3205864294940817	2.454832306894139	2.6538813391377407	3.7253322148246593	2.3540304955776783	3.576132931089393	4.3485074788082825	4.068435627546618	3.4894029020646826	4.610833423253763	4.441275270048223	3.212882870498964	4.7754019835904025	4.224843621253952	3.4659741628641543	3.8218225772845225	5.26810851991359	3.2229765315603016	3.688165899909857	4.185347221224148	4.179275950105323	4.1917070267255525	4.169739135734096
pos_2347	Carbidopa	metab_2346	3.17395	-	209.092	3.932878987888186	3.4621414691724333	3.203009649157768	2.934928258396748	4.1375638168190285	2.9577529815861032	4.5869146869395445	2.6065789162009945	3.9998212363476986	4.123422187161024	4.326540487513001	4.152392499260885	3.70924732861558	2.837372656457169	3.843080152339557	2.985012605496571	4.8693499197462975	4.363463142159596	3.8335586847529055	4.418300987939034	2.165836026041316	3.9230068865670296	3.352244286681465	2.8078543819639283	2.254878228993112	3.68168999777938	3.490415677845772	2.817750703186644	4.678845146408415	3.9779833590709512	2.321305173156594	2.9457196296845605	2.2985608082733022	3.725730836333636	2.5887664312405008	4.969590863015854	4.070860805229372	4.0429079782632416	4.131202576769399	4.071599130265853
pos_2348	1-(Beta-D-Ribofuranosyl)-1,4-Dihydronicotinamide	metab_2347	3.17395	-	257.113	4.297096388590664	5.009430988891987	4.249423792569071	4.015719105552344	2.7552550699461564	4.095601775620522	4.0638518518865405	3.4875369260978664	2.631349414259353	3.540053344085389	4.035041901633503	3.23989437377142	3.391671937262875	4.333498717103568	3.758346311943485	4.000425760159904	4.57431547404653	3.5906003153317587	3.1029420864732145	3.6245218321594463	3.722712093372144	4.0118863114633	2.7909876181861577	3.7259374241200782	3.4809475820773548	2.542141817154602	3.911952969059685	4.02426974279469	3.8453150865390944	4.247897967071366	3.95723211690615	3.2980840203731074	2.8473813225094684	4.318663825851503	2.7177333904268504	4.363250439456151	4.052227162998051	3.973109913480358	3.9594166361701135	4.104237970561903
pos_2351	Asp-Ile-Lys	metab_2350	3.17395	-	375.22331262800003	4.002717264472265	2.7031649640988267	2.7706656128911824	2.859014744966504	4.039452058239781	2.979786399385937	4.324287902096248	3.857767325820821	3.455164185237832	3.8455182546567714	3.698774982749266	3.0027152603981904	2.636719410449324	3.677801536333706	3.309055022692528	2.790057112445516	4.133431200203642	4.536533271828096	3.789910522064208	4.906897341333086	2.865557883272282	3.7844512451558856	3.5860305744023537	2.9816959079353222	3.5307663502579616	2.9292875764728312	2.830910538672918	3.8634212016942535	4.3279508520680485	3.0633727050872217	2.7725612165029725	3.7761555551764117	3.8055084559639663	2.7859217732407817	3.417645169141474	2.650757617562044	4.0018521917050425	3.8699674582587513	4.0246022074264935	3.921833259051252
pos_2372	Pro Glu Val	metab_2371	3.18458	-	344.18118256900004	4.642270574508422	5.220507599167342	4.551755580736342	4.2200438909694835	5.4431001594281865	4.766005766131078	5.174636193392987	4.93222900822528	5.102421746863159	5.071758188270058	5.13649415825312	4.952448570265144	5.465452583016042	5.010476629560489	4.619993475579542	4.725622907191176	5.192201265132864	5.0972517338549785	4.778554501858115	5.240618500938614	4.796384770524738	4.870640276201454	4.949969414423143	4.506591319820335	5.126409259394949	3.921616613675477	4.972413169802113	4.501370322753563	5.098548432552473	4.36350830101411	4.668648753090314	5.264308290051432	5.2011848644925145	4.522953866687875	5.050485195099302	3.9714963580152807	4.966855235623221	4.9838351718460165	4.980043254330392	5.001142402857772
pos_2373	Val Ile Gln	metab_2372	3.18458	-	359.229	3.6368612191208833	3.56514420400402	4.362085739954384	3.0377720134484716	4.109609782334356	3.873017095788109	5.293568798111217	3.1840758444460446	4.955588682418727	5.049635094696132	4.774458354223748	4.136126395106507	4.8688799928004745	4.181849527682086	3.742818969707976	3.4917578895641728	4.884524706927731	4.8201568186584565	4.902418801448025	4.792677737242358	4.191005343797305	4.765803217322103	4.809923560108202	3.1236902575278904	4.437585121721844	4.136540677162665	3.191522810877384	3.5971369891117244	4.878474165941432	3.161227594706252	3.4998143035351585	4.4486917212335495	4.437000187144814	3.4308103439949464	4.861443475037716	3.0287483324024604	4.550728097623838	4.572200365172375	4.586559263567444	4.5628597880580655
pos_2378	L-Argininium(1+)	metab_2377	3.18992	-	175.119	2.8983228367586262	3.5370624092925618	3.095225514449546	3.0969126796923847	3.7483016822787385	3.956984312632069	4.381565515903636	3.2128954209292417	2.7873561936443365	3.703799261184216	3.9889549800597712	3.2357169079583845	3.029820066117133	3.609469685648832	3.735249942231036	3.3793003466062914	3.994883621782066	3.8668731335684448	3.874993775599553	4.067438131123705	3.3626966908151537	4.122728947151685	3.755984385573509	3.3060210702461026	3.242733055236305	2.759760192505172	3.822615377094456	3.208842222945437	4.599932899830682	3.7441191356488224	3.851874731776973	3.610736753997106	3.2114099444947413	3.6063236820258053	3.446373629997096	3.594696249000517	3.779385947761973	3.7987671693004033	3.8020113998059433	3.8397133282245086
pos_2383	Ser-Glu-Tyr	metab_2382	3.18992	-	398.156	3.5235477636856376	4.284355183392053	2.1994335573021626	3.08956136547012	4.755247834308606	3.840387715930844	4.510610669457966	3.4272043145951447	4.5496994678146905	4.396286444835863	4.612592699012811	4.310973045456247	4.437654895044978	3.6449182584061735	4.256772998737113	3.3967624378511965	4.519953814916338	4.716472011625067	4.6138345654804604	4.511625460947267	4.0182943665335955	4.653531881968863	4.318929724883535	3.542190487172223	4.348601574274851	3.2967897456305395	2.144994049792538	3.3456700883888533	4.699024509809745	3.527021419209432	3.222395000985276	4.433743532408598	4.0865085965489865	3.7234469909978087	4.3732951765694414	3.693371678338033	4.23609706234015	4.238805563856572	4.27547030773742	4.318184855006794
pos_2389	2-({2-[4-(4-Fluorophenyl)Piperazino]-2-Oxoethyl}Sulfanyl)Acetic Acid	metab_2388	3.19527	-	313.102	4.771916170408074	4.24343618158436	4.005456995213483	4.9746321128213165	3.676848311854136	4.623813742974157	3.5055741954109485	5.197425768771321	4.280454332609978	5.3836276362498685	4.782207987587691	4.599860338763538	4.592147614055402	5.635050592045599	4.771740328609626	4.810253391262499	5.0982624325565284	4.462353995545719	4.598909617978348	4.087227411672549	4.761128255395626	3.3489157787461417	4.5975320155794135	5.114553553823517	4.7746641477077265	3.203652380047652	5.384572090920329	5.392224768213588	4.270983586613073	4.7432040845755585	5.348466320946837	5.357298083767324	4.4375485835935695	6.127973348953501	4.7899059283708825	4.593978780051449	5.090062264170425	5.092597915450933	5.086445083041215	5.102381328772791
pos_2392	Asn Ile Thr	metab_2391	3.19527	-	347.19206115599997	4.456394843414057	4.419357374844038	4.207594112874257	2.721754036553877	4.6753539448305945	4.74297754735083	5.156165554475275	4.375969612517663	5.183767232381404	5.113167607765324	5.290467228839368	5.08584271576817	5.054655219322704	4.710773094993317	4.464157892777423	3.992345887296598	5.169499341324764	5.107873085682451	5.229674251427553	5.120146617815824	4.590111510729749	4.771628008229031	5.002087949533956	4.490774980235212	4.956719460665972	4.6507532319853695	4.623900995650123	4.027970382990166	5.3548916334179415	4.484578801393191	4.5519938868749605	5.442185756497171	4.959152762429083	4.6558421819469125	5.117247809109591	4.68685161907082	4.909142433859557	4.896890541309046	4.932761954534357	4.901775602075891
pos_2393	5Z-7-Oxozeaenol	metab_2392	3.19527	-	363.141	4.739138019185182	4.931421705000923	4.525831960686501	5.23283416788224	4.726836411764104	5.05403115583299	4.696600200808152	5.079870275464153	3.882661608218956	4.26570542238247	3.855376211193398	3.748224143095913	4.150692463919956	4.964585730380608	4.633619158145047	3.114725857427525	4.052349525935009	4.172694221748014	4.083301290400148	4.7765938588198615	4.952323052716176	3.9077787257797887	4.858390126933762	5.001803023892376	3.1889389618601136	3.4771213240920877	5.0995048713400735	4.617103313899864	3.0803880617914907	4.9439918660628654	5.051695212864575	5.089496497322262	4.7821944019627285	5.134417037528676	1.0483963718204603	4.910991007382377	4.757196547880807	4.773021427995384	4.791404711917913	4.755242050181969
pos_2399	Gly-Asn-Leu	metab_2398	3.2006166666699998	-	303.166	3.6751436106656175	3.3063805316496366	3.4194045121592938	2.9227845931285175	3.9712432100413295	3.899663274918248	4.1401119171420255	3.0060479492043597	4.413808848299155	4.517557317384625	4.415604254339733	4.134098177864293	4.2974497254438235	4.076313806651833	3.1069139861451363	1.9435687826962265	4.341386840943584	4.032977092393399	4.0479461964714085	4.4175285415073455	3.857216711372084	4.131794896567441	3.7880827443642797	2.7892456463137383	4.025762412907106	2.135910202549351	3.668210283839879	2.2405920761421747	4.3834183785089	3.759454236608424	3.322598495432618	4.705088491767924	4.435118893155128	3.605548435957642	4.291160199526174	4.231991296335526	4.056997969743091	4.025840136799038	3.9702336607094018	4.122265726502114
pos_2400	Val-Leu-Ser	metab_2399	3.2006166666699998	-	318.202	4.3720125286702745	3.1234794236486967	4.389241966969516	3.6589554498431904	3.762995377425405	4.206480665019996	5.397688955598085	3.7828479903886407	4.953354653497202	4.873570221906356	4.486910338269609	4.299318675760797	4.461709005114315	4.3435333567100285	4.00376168200198	4.258372480742683	4.896393300419175	4.7687081763393175	4.778404476646626	4.999228524068983	4.526227414467852	4.841335831470695	4.9166202052937855	3.41651205035486	4.186220271521013	3.208857201176832	4.502899143631336	4.057423814141639	4.910035498803212	3.445454260387056	4.046260465254702	4.724620460551108	4.658651456625353	3.821158543738792	4.9028006310500585	3.0710035217385045	4.612785607800628	4.614346469615535	4.6586604478126485	4.652436599817396
pos_2407	Ser Ile Thr	metab_2406	3.2059666666699997	-	320.181	4.715506210725702	4.675608542909255	4.3379683018744695	3.616467801378973	4.964743891604867	4.939681401892578	5.050705946974883	4.242972033678379	5.368709324612316	5.247164539798555	5.076719552502267	5.146527424304911	5.129785941610706	4.90873770421674	4.797319022741264	3.9342749533671775	5.24535964874108	5.118982593590699	5.337873449250927	5.122304826976661	5.034247501051797	4.853930036891501	5.156438417284216	4.902423935903191	4.974063966348687	4.920913199247726	4.6657543200274185	4.568105246030318	5.22985647363526	4.498827596117866	4.274164108944341	5.327695151439919	5.124286178672955	4.424553529991937	5.299122876764245	4.632017408965915	4.99682615718016	4.999563213363163	5.030736175615127	5.015063685108585
pos_2433	Leu Glu Thr	metab_2432	3.21663	-	362.19179101199995	4.7864996270043605	5.492948357128509	5.159018139502106	4.742880722351353	5.391996728092374	5.32948547559632	5.6648942236760425	5.390183936225945	5.717156754222713	5.613566256779171	5.772509949055796	5.462301058385134	5.416391048382052	5.207525010436557	5.066739911977283	5.094118252907295	5.662414080877541	5.808716328178456	5.611792485644622	5.542868676202533	4.8939645587953535	5.467721761065887	5.1577628223441065	4.9767357562804975	5.6073297781470846	4.825432775124796	4.931442408846379	5.017055338630928	5.816910482592314	5.178623697371525	5.216864331641176	5.532483763581536	5.189699445565866	5.275710112080999	5.6159459508543135	4.666980239117997	5.4285559076917185	5.424000876190147	5.4378368084092905	5.418193275975288
pos_2436	Styrene	metab_2435	3.22198	代谢途径;芳香族化合物降解;不同环境中的微生物代谢;乙苯降解;苯乙烯降解	105.07	3.4149596783557734	3.5226283570313446	3.1191660469823934	3.8476178636624847	3.3786113435028247	3.1899167631258143	3.7221449055881215	3.5301663990504157	5.902482266803777	4.649567918732647	6.141947623643593	4.244960232772264	3.972819941080732	3.5075064480463682	3.3065272225337146	3.571505243642528	3.880378571790069	4.886643400166949	5.1138387228077455	4.845251942433351	3.6815425182226003	4.188982200588328	3.5114872318122967	3.8032340248237713	5.307158775186683	4.504749854143084	3.2158357222785203	3.6681094859204144	3.7582132703638793	3.8941946948302286	3.7000506722450703	3.824799639123978	5.401431951175972	3.619090033113265	2.8079448361493298	3.8591466449551217	5.0141218299806845	4.9980580240567765	5.008267177895736	5.00948835432146
pos_2437	2-Phenylethylamine	metab_2436	3.22198	代谢途径;苯丙氨酸代谢	122.096	2.921104842151627	2.89697517789164	2.097938429473373	3.438009821664393	2.193161321483061	2.572134442058356	3.096316733255437	2.6054297706109213	5.634037371999942	4.377471512181527	5.874193957349179	3.9781114442209327	3.7286819452135087	2.6284822599412068	3.026053226225109	3.0502062145631323	3.522787522580719	4.57675168888659	4.827559788265506	4.572583819930794	3.1133948424035047	3.9468266155814336	3.212892211013453	3.327225060752772	5.035897583959452	4.204548904710109	2.697968452635234	3.2236844721477063	3.4437990265425023	3.4243885542025274	3.314314962222727	3.265766870077316	5.140101587764134	3.255174311595116	2.040004795861616	3.3586913474447395	4.733920386395497	4.70830274095529	4.726648669249112	4.7229726604207585
pos_2438	Epsilon-(Carboxyethyl)Lysine	metab_2437	3.22198	-	201.123	4.961119345991025	4.911145860670836	4.753095090942423	4.382455569237057	5.241596899762345	5.05539819668825	5.367034181671539	4.908311556615128	5.520231139503286	5.4287806650419785	5.351464102486871	5.4433002368501135	5.342194907879271	5.071694415820441	5.087522923026781	4.874386032782763	5.406922959691378	5.4255952384378245	5.435118229706546	5.549178505540834	5.195116960256828	5.29520854854232	5.4212431855907885	4.984150040981014	5.39091498138772	5.057563893290993	5.07917156454869	4.748906301021943	5.531099623861007	5.150978103587613	4.886037763389266	5.623840070971023	5.272035759277399	4.9919889998989655	5.313701497043996	4.93607225118999	5.245809467882997	5.260084464759976	5.264599971193363	5.249110530937095
pos_2442	Thr Ile Thr	metab_2441	3.22198	-	334.197	4.808183046772762	4.590017424814572	4.607826094130549	3.828168632471625	4.906315380154026	5.137505007440897	5.542880644306825	4.69852593831054	5.436647125143288	5.376187399769311	5.2823377684999695	5.002611162558608	5.267832459190074	4.916134438274684	4.684283783590889	3.9367771532769873	5.471516549049684	5.236823257714189	5.411423115233778	5.426300695049147	5.000047105339936	5.2368018496841655	5.373855796958736	4.43230650699281	5.02717768233829	4.922856722400289	4.5616647138390665	4.57047273041075	5.370720894334201	4.270071808710456	4.705343520902285	5.399680526220172	5.17079319030841	4.689643233992366	5.491933092679294	4.433301249393172	5.117450850412434	5.1076277850427685	5.131619341911592	5.093830588482902
pos_2446	Osmundalactone	metab_2445	3.22733	-	170.081	3.5350550105386667	3.604491631731056	3.592754028852084	3.8688283211386234	3.5711158413701427	3.901838229882197	2.3518408826248627	3.621750850213358	2.220914600751041	2.4191504468102694	2.397619371657981	2.392376759389492	3.453100644420841	3.826022685136007	3.3782854664289235	4.416608628615947	3.7971485770620186	3.3828787563723086	2.4590279954891696	3.4865769350849654	3.4215646576360856	2.9164028195372005	2.814724728965456	4.183300617975322	3.365922004149717	2.873352711217875	4.232458201812858	3.8982291231910895	2.7776667062703293	4.031396904233063	3.894029521776607	3.259032950484426	3.5457403510767564	4.290313395528654	3.321328538719098	3.5941782058770544	3.793183159571732	3.688125006751634	3.7708805747914296	3.7949544236104784
pos_2450	Val Leu Gly	metab_2449	3.22733	-	288.192	4.243963454509806	4.1685322564801135	4.319528462451788	3.410584898002317	4.256192940439118	4.666219969469379	5.096059900813267	4.487265574162415	4.485494905980622	4.644585160542227	4.337750725320678	4.1979780256263615	4.651958130034781	4.834971005308205	3.7629795101974888	4.057225584965897	4.65204413161015	4.485015709242548	4.352273235342285	4.968344150530092	4.527201479252389	4.285756343612099	4.674229442294598	3.4761413302822004	4.3075551388201205	2.678905484461899	4.031970435613716	4.009811590953638	4.193289179955881	3.64425950406062	3.7891305804811366	5.008296998783081	4.815375096945872	3.809538300167262	4.682745777657635	2.7929919182802903	4.509306679849082	4.492656150340321	4.566469249671783	4.5033950841705215
pos_2452	5-Hydroxyprocurcumenol	metab_2451	3.22733	-	314.171	3.448016466756312	4.1549728115288405	2.935491424337831	4.055602889570069	4.312338177685248	3.5230027998903206	4.03144610954762	3.3632320198226737	4.478919397461207	4.2714209199605175	4.6982711768023435	4.110941386025163	3.9104712776445623	4.259319740771638	3.8327950817887535	3.710465318012589	4.44531768739976	4.531062654331844	4.479527950265907	4.3251063212063485	3.4490270795512146	4.125086190101462	4.062556569668983	4.666641150887939	4.003887347793579	3.423441677958756	4.295355418055083	3.710047690665253	4.3427497590092505	4.266299575461582	4.0340925087423525	4.02847218609246	3.957553492609808	4.0076850284042855	4.266184547653939	4.057189021550408	4.179775766356141	4.184293870443839	4.174454461944428	4.21113132829755
pos_2453	Asp Ile Glu	metab_2452	3.22733	-	376.171	4.6542618171950325	4.277440756001073	4.18603397770531	4.944531889125598	4.700405044937419	4.5911074931379625	4.627612328946121	4.182943827327092	5.2130398596094505	5.261658581737341	5.234166409254997	5.408752036313162	4.863317173135137	4.420137495819813	4.587336681888051	4.5434287730066005	4.531397692760611	5.269208850827432	5.190843173147469	5.176667762021912	4.6624296750112775	4.970239472877104	5.0119310975364835	3.689877290678842	5.163712935032841	4.546142260464073	3.946932352612917	4.3775527418719316	5.415398126517996	4.616488333536721	4.433404265108425	5.1759244458434885	4.458391486694487	4.736655937146348	4.21164647955184	3.8539206277079683	4.905537358118015	4.8821047573428284	4.878821131441941	4.884655568853011
pos_2470	Zeanic Acid	metab_2469	3.23802	-	206.045	4.601168036104067	4.27936330460892	4.7396052271384015	4.292867447654474	3.3887767457904507	5.096950525373822	4.5161984979047185	3.978253735542717	3.5577684208924314	3.1545086110946947	3.6386354040914894	3.9150885267503264	4.1986875149903975	4.867461729921272	3.9071329166028215	4.697912275128007	4.880635511608088	4.04511522183235	3.2584257503557126	4.2790188682622965	4.329599406937769	2.942386041587373	4.297421910458303	4.451055702377984	4.237197225540556	2.780837824121296	4.318960993481984	4.2684874836857984	4.131863027192075	5.17330948123808	4.543066781329227	4.047374497942081	4.146963535722308	4.669742311532552	2.9566051273823213	4.576992946904335	4.439481458245703	4.460014800637746	4.452108040471359	4.4487605927809115
pos_2471	Hydroxyprolyl-Valine	metab_2470	3.23802	-	213.123	4.672287339489872	4.066137728932607	4.486958806213926	4.485230315738264	4.2016118567274505	3.919010320861152	4.110691582999387	4.931675423479126	2.8417927108729883	3.888217293091272	4.140873611680462	4.044640717467814	4.086962873173121	5.045796010620896	3.702924239555702	4.401111747033637	4.0642923373632565	4.314156254431177	3.1451346361449968	4.247446095019455	3.698222519774869	4.267751245946086	3.6988340342166732	4.978926161562716	4.432321337177076	3.017813395058808	4.676920283556287	4.566814688323498	4.180217733157576	5.386281367571424	4.75202242222132	4.109623475001931	4.366131263222976	4.707379126164517	3.08173131950636	3.966984758937377	4.5002383977886815	4.4731160957711324	4.499388142768347	4.521392499742452
pos_2472	4-Oxopentanoylcarnitine	metab_2471	3.23802	-	260.149	1.4761929615098393	1.3746844852914846	1.8920743623670937	4.58124161646001	2.191324569805469	4.720416585082032	2.4428648506662363	3.850784638308022	2.1499780736380782	2.066613332831333	2.378178340313991	1.9837357794576955	4.623476251393068	2.1672212733503065	4.405260693866368	4.579461081095587	2.802361485861472	3.3003775422048416	2.8725071700892144	3.3662744901065804	4.12785061069096	1.8280338035579198	4.236252978362561	4.580810064282252	3.0902361554925237	1.7862386636712444	5.687595749952282	3.6070353427733255	2.860608724101428	4.802074488608615	3.689719725131436	2.19396775016391	2.2029305438499795	5.281342298628255	1.842296372476097	1.1347399554655262	4.454318982769159	4.481462590199379	4.510741697621425	4.417967305450238
pos_2475	Ala Leu Thr	metab_2474	3.23802	-	304.186	4.847608991358479	5.001189462522102	4.777022224619164	3.8125321389559286	5.2617144807222935	4.926302670210924	5.67021018249775	4.956657725053066	5.320555438363284	5.43182772819639	5.52006399513633	5.048550455875883	5.308232467943811	5.099660241012495	4.969993581578403	4.4926088942430615	5.443750469187318	5.2330091435362185	5.533568179218219	5.634007597834754	4.985409969743805	5.346208191278388	5.316267226338503	5.0442541075022165	5.186584554075421	5.320281496237807	5.031778325108938	4.61712080588338	5.451554081263901	5.081494548588157	4.402108377823446	5.865745362209804	5.325976425141967	5.078511765952132	5.537625278884665	4.854912733849159	5.241353705451348	5.257117763446562	5.2550671106310975	5.266053658972881
pos_2501	Cyclo(Ile-Ala)	metab_2500	3.25402	-	185.128	4.331461688128342	4.603651373291469	4.295257650953803	3.8130363982308637	4.768703981411825	4.611065379530606	5.095799017209463	4.395771373251087	4.5922167470154385	4.731403345465305	4.855362249092893	4.482488165461669	4.718938464826157	4.679563937204615	4.382692536671747	4.295048063030468	4.828284548939418	4.532812219134716	5.071947512878505	5.029083330978678	4.556721777761489	4.775350662910824	4.81957184281232	4.5472246613577365	4.522597648745012	4.29653951757632	4.554267124317068	4.229182111968696	5.0325459139247855	4.59583404532372	4.121059654304206	5.230540685812589	4.812958888887678	4.762630941716637	4.868950417825262	4.328133392375086	4.715450532569523	4.694309531868745	4.723528267069732	4.680008303128301
pos_2509	Levan	metab_2508	3.25402	碳水化合物的消化和吸收;淀粉和蔗糖代谢;果糖和甘露糖代谢	505.174	3.9553364765296735	3.636453894693786	3.5504219250971003	4.586716313542471	4.902174989532623	4.931883687375294	3.009261195376747	4.102621620020599	2.8778021369100526	5.713329930151862	3.0551910555268327	2.9442305414985053	3.78652389603316	4.991942711709003	4.382495395634677	4.484941846966833	3.0677906325216364	3.0705847990951134	3.691733715081349	3.628592327587188	4.1963144156700025	2.9500462022146987	4.027764907241173	4.786479396676423	3.9124223897216974	3.310015653671848	3.887376166837152	4.4133312054699605	3.0811002798789167	4.413583664735043	4.110876296584077	4.7708070616383385	4.828489264029498	3.0379061021611093	3.565727499429745	3.1426867162531096	4.29539798950558	4.3813263621800935	4.387576392445243	4.276799790869518
pos_2512	Bufexamac	metab_2511	3.25962	-	206.117	2.56904509970886	5.750693655646584	2.7962570827679007	2.944581729785955	4.701244041482421	3.4204368506519716	5.0318939191289696	2.7087535084135945	2.440543382062509	3.4398764298618003	2.9833881867459766	2.5068298213913454	2.4512919248191305	2.5670632328178455	2.560181013880997	3.398471915258733	4.250684609466791	3.6066556581711438	3.3397478286889823	4.294106646253235	2.431110465788948	3.517450660122766	2.8503869694262702	2.5600424983555	2.7025483255009695	2.370254644192411	2.7121486024669155	3.4185698301510263	3.9327570409935673	3.6531995502404393	3.2926370467006465	2.9085418483544188	3.245711783225638	2.615387537398834	3.0365303797789607	2.465313110288684	4.198737455854041	4.197401827654272	4.186054857488535	4.264547344285488
pos_2513	Trans-Zeatin-D5	metab_2512	3.25962	-	220.118	6.118167262388322	6.199114408592777	6.039849672986505	6.29744744531968	6.447785670818968	6.6324484395055405	5.968850559621857	6.245955617185782	5.5146015844871465	6.8876576243300045	5.71824549717865	5.619316404346786	5.9886410929737774	6.514055804512509	6.164135796638372	6.452654081527621	6.020937289120027	5.899672663106482	5.54868147478364	6.059454713106668	6.139552078477948	5.6068281521261225	6.080917565221559	6.4441682544916725	6.018448482746591	5.661939310783754	6.103500790968559	6.226767769569317	5.737209755401727	6.4095617942772005	6.046909038165209	6.4270871967338445	6.3995219098396126	5.991259366523867	5.891707860655456	5.930325548481407	6.207506703266136	6.206406721950665	6.212630930310497	6.214565518564823
pos_2515	Gemcitabine	metab_2514	3.25962	-	264.082	5.008709010977661	5.046941289799968	4.862529452760666	5.183099216509827	5.3460665802786576	5.317286344089942	4.732397601263042	4.8980767546580015	4.504852095584295	5.561961151697919	4.538538825268676	4.4394254342031605	4.953446725544902	5.244843057564631	5.0857850978204295	5.2067476925503255	4.713951333973774	4.645791312394083	4.376126564828554	4.824907734743434	5.093377102389156	4.5021940540097845	4.966581450599612	5.2881575910882646	4.867213665840737	4.6622634157089236	4.7753309315377255	5.1573625436944255	4.4477991857222	5.096737468049925	4.8374352447670885	5.1247382352084365	5.229807738606321	4.618472712473023	4.805377242194209	4.804942860607928	4.9931529669321835	4.985524277065943	4.986198130500868	5.018428204861894
pos_2520	Ne,Ne Dimethyllysine	metab_2519	3.26492	代谢途径;赖氨酸降解	157.133	3.9071001249159645	4.418751279145174	3.2404467149297593	3.498283424366833	4.526908729577299	4.274373144087421	4.619212882737503	3.7037032065895295	4.049669077235048	4.45780510193716	4.312649595058908	4.1216076028936035	4.148041633131611	4.269938682526028	4.220134909323632	3.5077247566924976	4.349370271048461	4.267235475585069	4.76953057335927	4.601937005648588	3.999365596527967	4.503403730115243	4.448493489315952	4.23247395491404	4.33398504563415	4.171654357419016	4.0285177642344765	3.774131793507557	4.843124958904248	4.060341581941394	3.7597647774571334	4.772554510479879	4.270609553579506	4.308212500710141	4.330151020973453	4.116753043074616	4.348900221156013	4.315964586106219	4.324894632154956	4.320780760749054
pos_2522	Trp Ser Thr	metab_2521	3.26492	-	393.173	5.0157631049816205	5.327499779175112	4.891608210525054	6.173585065303688	5.178368325516922	4.3292096507167885	5.00637748978396	5.830813799470558	4.642287033439035	5.227416724768356	4.759841276629602	5.397107295644823	4.814045857893358	4.52520759175525	4.249878423899784	6.945608440375015	4.7056520741694285	5.339074038028373	5.8345422963677525	5.471963943218223	5.227995249750233	4.711254859298174	5.5703820208959876	4.42135294156719	4.637917402865718	5.406807108550297	5.18627715832374	5.640420236378077	5.178747321752028	4.84237141583479	4.482835585446409	5.1343081962227926	5.966263826730148	5.4617913444733235	5.261364407271826	4.3776821421864645	5.639833529844025	5.618605991443265	5.6622612753417325	5.677230120497159
pos_2527	Met-Val	metab_2526	3.27028	-	249.127	4.26589939693404	4.79882945207792	4.407527115268157	3.918698613666289	5.208955008062002	4.662514726921996	4.986067098466548	4.507907786108594	4.327508590563154	4.938829644003142	4.800061901725117	4.583937526260066	4.654157654427409	4.871029146394671	4.545216497629839	4.473136553648578	4.777140983514212	4.749786612803363	4.7917863768516735	5.0341457771935225	4.630446779022547	5.119260609826958	4.917885374691191	4.906178883495119	4.793292623038911	4.707502084294767	4.674929670039691	4.337055911688526	5.172888980290893	4.926086857318347	4.462520537372517	5.342043625092202	4.975079431715558	4.892542146045049	4.788574214268127	4.467536910147522	4.809574312220868	4.823496216296361	4.854227636716813	4.8432802789513465
pos_2530	Orciprenaline-3-O-Sulfate	metab_2529	3.27028	-	355.093	2.8281455796523494	2.8829393062929847	2.9504820105355254	3.5148641011142643	2.9296640674344645	3.9294041870238967	2.937106806055445	3.2724355832124	3.6258664385342274	3.68224727119923	3.869784948364202	3.504214224110658	2.816445448432673	2.9324218619841083	2.9255289208785245	4.215844268343756	3.4398133390729217	4.708471545057648	3.33897009253954	3.2888056392895693	2.7962222849168348	2.877903048307429	2.9654165827002386	3.4372622703908395	3.9490230591057656	3.1901519568704524	3.08094176240386	4.238356461919685	3.0089341642496272	4.0834551711455696	4.090550128261183	4.4850979304875995	2.9295485501969187	3.609390841264203	3.2678471544061827	5.177670048679499	3.946822140731317	3.7194172725921417	3.876116392577877	3.951222230299959
pos_2540	Dityrosine	metab_2539	3.27558	-	361.137	3.4454208746026054	3.840286889456972	4.010603691747924	3.967840770882893	4.895172546751136	4.365451461454145	3.773845162842379	4.4474535357812215	0.07823382617102552	3.808252936579178	3.4683227013407523	0.08992315898976433	3.3251294867378367	3.4814750469289515	3.2756940637880634	0.10999312127846277	3.314557263974692	1.4002235919932822	3.429772602910108	3.337163563814621	3.523496880646355	3.897947031887607	3.4284421846460207	4.179652739016753	3.4780990323391623	1.5420491507958636	4.510612050656426	4.722682630970655	3.0348367234827687	4.468406301564733	4.238221924701336	3.7625721311407263	3.974573885310877	4.581855323967001	0.09374549299920268	3.7680754481859124	3.7409625568704814	3.824705022611562	3.955506203698616	3.845780831154317
pos_2549	Isoleucyl-Arginine	metab_2548	3.28092	-	288.202	3.1899815637876134	3.5704811111525627	2.8498223933409537	0.8830751706121536	4.171239486543271	4.302025558234984	5.212066534197722	3.2405527953125315	3.241887355725153	4.149799296095323	3.6774517274734246	3.509968367895284	3.2476591784853572	4.033973870478585	3.670843685375512	2.3888269997185927	4.359899078387647	4.2692653671351435	4.522036620156394	4.394445445657497	3.837687338663861	4.66496984171426	4.318804777993061	2.8671886856517004	3.5721853181343652	2.6016836545592863	3.6654846488233854	3.1752828986679886	4.727289897465795	3.2575619313257542	4.175977424423313	4.6231331872463945	3.737576782720415	2.4254379111635687	4.024475252245692	0.8752361172376242	4.274081922355507	4.224745117732474	4.1355374761560935	4.186015670903364
pos_2557	Val-Ala	metab_2556	3.28627	-	171.113	4.881273143746655	4.769387978079786	5.05036304696438	4.3892071978785125	4.88757196709198	4.829924773314311	5.2929520690280185	5.475872180042539	5.171315000780887	5.305265052623822	5.3244347619083445	5.28532979199205	5.285138361764987	5.127149856987832	4.838408486574383	4.462064074800804	5.295962079908543	5.273361589494641	5.205671424240143	5.413649337087822	4.969519339009046	5.248855741985665	5.260007986136311	4.656174757263858	5.120517230990467	4.633112195505297	4.820549028574627	4.765449066690064	5.170833988258979	4.508181254458768	4.74089330492972	5.648868356757815	5.2982956291104415	4.911488011409934	5.210562914737842	4.642381400480943	5.111667791253987	5.1308689611858425	5.1407055882419215	5.1258834703454825
pos_2569	Delta-Hydroxylysylnorleucine	metab_2568	3.29158	-	314.171	3.5883163121277266	4.18871407088584	3.5240426934443314	4.320639055781209	4.64135322721117	4.409450208680545	4.386543189342763	4.126457634923688	4.588021115698585	4.164037531368422	4.695595593101347	4.619173184396657	3.822858630146103	4.247204842537689	3.9486081655032383	4.422730211206511	4.758682640429583	4.7383335089694265	4.5800912746175415	4.989351298322367	3.6652358607560895	4.250431915642817	4.338932907632667	4.6502377946572055	4.410908425489203	3.8607086887757167	4.991863921472585	4.6438406601713655	4.976276939730687	4.6532792239978615	4.490894081152235	4.2431434356284665	4.064787855653416	4.865759942219394	4.461857264517428	4.12203192111578	4.597285093080037	4.506210791470972	4.558947121789097	4.59412004026666
pos_2590	Phe-Lys	metab_2589	3.30225	-	276.17030727900004	4.50578228990103	4.274698760211392	4.1137863039343685	3.623610309995637	4.292195801631867	4.0036556680553534	4.307162148530983	3.904300780595992	3.50921915790797	4.486928505715039	4.4558406337757095	4.368514445510338	4.747039542869893	5.015596757370751	4.18411823564388	3.3765749868133415	5.043401548546512	4.754749162533306	3.650300923257213	4.315645570796865	3.9885747073654114	3.8132064183757386	4.364128122423081	3.5679105219881984	5.354454169027785	3.8917962041164573	3.966483631013991	3.8273214306227215	3.382580759131292	4.001591600933756	3.3259911212232742	4.755386305970959	4.338087309460488	3.7886692563874083	5.08074807605792	4.666570485825035	4.462910473778417	4.420500479330207	4.411022632573072	4.4609083255177735
pos_2592	Leu Glu Ala	metab_2591	3.30225	-	332.181	4.730603219936352	5.1258095394304455	5.025422088261304	4.478027546901114	5.552109979864347	5.122253893217328	5.384843182158173	5.000654177571703	5.61272726738037	5.272040074104361	5.66650937108204	5.2709184485456415	5.106862021656123	5.145845365073273	4.938468110642093	4.834851067979663	5.3825438351123935	5.417223482668411	5.5399578671177805	5.5294289897047415	4.96203218314081	5.387275412235899	5.127976396192516	5.146113952965094	5.259259434336251	4.948677374579449	5.063056263132572	4.852141439118299	5.605535499185631	5.1298977061410485	4.8653490206259695	5.628072886685988	5.181916315678198	5.206350269466043	5.405298543711653	4.871808969237688	5.2558207510901065	5.2470550540578085	5.274895363811772	5.2854529973240245
pos_2594	Lys-Asp-Leu	metab_2593	3.30225	-	375.223	4.217945226996544	2.5147415098259853	3.44011963299069	2.471395432557627	4.238585137327871	3.6713795765932895	4.775948893105212	3.11551874577618	3.8242966202361295	4.290588396980555	5.060340024217922	4.137927066627516	4.372981730398421	3.945796278760618	4.102260626240224	2.6015487478554005	4.531037234365668	5.576808506864596	4.546260091469347	5.335629582662892	3.9978224045856496	4.4468092392860745	4.091188749073536	3.722358188381768	3.5000775422367827	3.6179967583606674	3.843274453381308	4.429095343108823	5.1940715136874935	3.828976776730808	3.186737004992791	3.8143298492277813	3.305801349973829	3.471270801875555	3.9602451336778257	2.4623942099284384	4.465416222665507	4.52398559250523	4.471712316472485	4.446736694228654
pos_2596	Ribostamycin	metab_2595	3.30225	次级代谢产物的生物合成;新霉素、卡那霉素和庆大霉素的生物合成	518.246	2.804432182164238	1.1747984495668344	3.2250922245223053	1.1343601264860472	1.2186055555142912	1.2857021152764134	3.8442153703436563	5.3335971871408425	5.2426493102421565	5.355418064488597	5.307800833875052	5.225221929820433	3.591480679434301	1.2212001801723449	3.3779747937578035	3.6324121771911377	3.8044243784650784	5.802689345359213	4.787932908132532	5.163548433161004	1.0943365329216583	4.313435838136457	5.1294806811182685	3.0773632861511784	3.4912463414419115	3.8330337833360613	2.3247832102876687	3.3669908028649367	4.9372534758969495	3.314136454309553	2.9933724090004934	4.190489463500319	3.865985444706834	1.2526286715466843	4.114165916715505	2.4582417079164056	4.709395635801815	4.6235066347421085	4.727453067742082	4.7601279077803635
pos_2604	Gly Lys Ala	metab_2603	3.3076	-	329.182	4.732345963299467	4.021491616603873	4.99053265864262	4.368034690337215	4.5324153053605665	4.845083997564517	5.450873012202046	5.273934550444976	5.771880018736709	5.2669081487423455	5.031980685083004	5.106238275426868	5.17268730826457	5.021196067015038	4.475349451925247	4.508017664063341	5.232305843995995	5.222005119392496	4.919520716062818	5.764810369563981	5.081696766509785	4.821380457846214	5.3312779957020995	4.759326480061465	4.9359081572062005	3.392557643717616	4.795816829585208	4.519708855944281	5.079232018576599	4.3985777730315965	4.2488333726693694	5.636029494570766	5.3111995045368605	4.854293834355818	5.0419548213033245	3.8195844441356352	5.116946068210644	5.0981561114234255	5.127123206985598	5.129329774890032
pos_2617	Lys Ile Val	metab_2616	3.31295	-	359.265	4.587874027307045	5.101443117748673	3.6147132507068815	3.503633424745208	5.248468289978188	4.720736262564586	5.061563286550396	4.8061993209767016	4.697786218588451	5.246890630385408	5.232730411061055	4.4503876869932215	4.995485055945074	5.35434262827574	4.4233667297391435	4.146942342802434	5.14051931819039	4.272380630753732	5.692968009896905	5.705410428095234	4.9906744881963	5.08344971985662	5.462740787904587	4.8936600216009465	4.899592490864451	4.434140540749538	5.0249342902414655	4.3062609344197575	5.327867175513168	5.023237383072772	3.9913712273200894	5.7070116115424225	5.385180328458235	4.892742510444738	5.108676211570321	5.013850733110004	5.1424380559375376	5.129976578046693	5.122976244726045	5.1133418972368405
pos_2618	His-Val-Leu	metab_2617	3.31295	-	368.229	3.297460382174735	3.5976266601924007	3.419901579550419	3.3088391561548134	4.3491854516515565	4.080644856537447	4.47851828597443	3.455195897549935	4.8100811206620975	4.744343397471732	5.017110395837257	5.098457714219603	4.781250588084033	4.211338942949075	4.472842986845273	3.4393180666332244	4.823507870210976	4.720282148273868	5.06698877758354	4.609138572298832	4.113069887047957	4.686740594482723	4.479501137184182	4.450823809741685	4.6763134014862695	4.222910640677826	3.8280360546638215	4.114996003105976	4.928841915239849	3.7880822676706516	3.995638501600749	4.627233371135313	4.266802599755951	4.014815680601006	4.921225749952009	3.502665329951108	4.582941015205168	4.558356352857278	4.58247394833596	4.583577018548613
pos_2623	2-Ethyl-3,4-Dihydroxyfuran	metab_2622	3.3183	-	170.081	2.296316951802696	3.143214483966441	3.417988880369182	3.26146795105627	3.431049494987667	4.338139278435014	2.5375576125530803	2.5939117212245715	2.273928734141379	2.660478036431168	2.450734409793462	2.3401105363214505	2.2846592082327897	3.451679910275563	2.7225177739158446	3.5200623644726483	2.897763848016116	3.1181258798324887	3.1018073197329112	2.8560346210682708	2.2705445376753124	2.3741934245732432	2.4331670667202743	3.621737181721914	2.543929678679207	2.7465029786293447	3.450051851215989	3.310963492775016	2.780233113662983	3.553021874706149	3.67156232607108	2.6780419950248806	3.3278076675973236	4.062100706659053	2.701300192414088	3.895510170170645	3.339870708552542	3.190302966266678	3.4977302516189583	3.4091763967968527
pos_2624	Meconine	metab_2623	3.3183	-	195.065	4.130715448028936	3.875095021549156	4.237548826925626	2.333603318679001	2.4234937756707566	4.430725172407404	3.5915951712273317	3.846243952765758	2.2998773949459848	2.9862340833825165	4.008763948121501	3.5409511501187683	3.7759321620718773	3.9980162619270505	3.12042127263526	2.6345079866916885	3.5054843319354068	3.5588653793077945	3.6065162765947054	4.2312940254927085	3.788307340044416	3.1364266941348484	3.5194656317622797	3.6443365688665836	2.8227220167918547	2.2109353758069394	3.5357529915348467	3.646761911259147	3.0171447074649715	4.256495979276666	3.7650829615977854	3.3369454392508144	3.5762003680136605	3.358003560920665	2.5919894939954395	4.095993046387019	3.7848630477563763	3.7532348622384015	3.749440190380348	3.82043
pos_2627	4-Deacetylneosolaniol	metab_2626	3.3183	倍半萜和三萜生物合成	341.157	3.5130786798085363	3.4939514549633186	4.100208280034432	3.922680925789882	3.5124171250765284	3.7054286950005024	2.03055709623346	3.1758667772790403	2.043317535727617	2.0975613727110254	2.260934127975012	2.2746476286070414	1.91103119949249	4.255072155534685	4.187882345732277	3.1954696087694834	3.0984344955990286	3.2246714148985536	3.3622538365631374	2.1326487434311203	4.148475571934377	3.032103568452694	3.945310305416655	3.634762697029623	3.9618088113754935	4.3224570034535095	3.596347558125456	4.631194379940856	3.2201533251201178	5.0841204209044575	4.276868850565773	4.407234417442145	3.912526223154928	3.318271851919698	3.2336846880515213	3.665667268418016	3.8478835744323416	4.0108387384886335	3.7555252811227793	3.778831467785871
pos_2628	Lomefloxacin	metab_2627	3.3183	-	352.14790632300003	2.8643613152724874	4.556945149643507	4.849927980929414	4.1172007505570685	4.546298368266707	4.920356412411106	5.146226710047392	5.304150832871116	4.553964990305047	6.271043762212518	6.077539780901406	4.4737744331534275	4.4683383402944985	5.677670615845567	5.7977010342332695	4.70406361029014	5.041421588189249	4.942853295234436	5.095658201637856	4.859081190801146	4.8160076408093815	4.915216775947188	4.481659533167045	3.5880547813638675	4.815938392927868	3.4607164462793283	4.146976237352863	4.111315911804955	4.896072401206259	5.6460072196727635	4.479888477455888	4.689450205008997	4.8810792371621226	4.203761004821983	4.8482911378538605	3.744043411226882	5.209410747213335	5.2477689012815025	5.209112722846523	5.2198554148008265
pos_2629	Ile Val Glu	metab_2628	3.3183	-	360.21257670800003	5.015888499794206	4.7650868609741375	5.239274791002903	4.236154290661888	4.914493543514887	5.039929191580495	6.065462211130941	5.150513544021703	5.850898644855107	5.593774213001447	5.433808489339652	4.917094973087063	5.223484505459283	5.041889712956948	4.8131534158753375	4.6426413363398025	5.5095917706651125	5.5196058916656865	5.421740452710239	5.5539604732224745	5.130965751663691	5.35646504773876	5.431165504587065	3.9281927409807063	5.230706803948246	3.2373769770574805	4.613547262833978	4.613930910963856	5.372997503849408	4.0786828227085055	3.9642442388805454	5.548841851823154	5.412432660424213	4.734171708092789	5.57571453551497	3.351615770522857	5.298116394760116	5.327642600236874	5.302284553690915	5.3098392978212585
pos_2649	4-(2-Phenylmethoxyethoxy)-1-(1,3,5-Trimethylpyrazol-4-Yl)Sulfonylpiperidine	metab_2648	3.32897	-	408.19815119199995	2.8648773837683685	4.396125153578127	3.951731357756719	2.395431607193502	2.974415378997277	3.449326669457975	2.233754588973332	5.979964084767032	5.2772302175584604	3.837934363423911	4.853492327649281	4.920897610132194	4.008311662340736	3.8137957149831054	3.8820106931719898	3.2116838714067835	2.2920176286618643	4.443199311235056	4.231351490358247	4.830491466206959	2.0936494397412058	5.82558924894956	2.2619358816264983	3.4974485811048903	3.4596294008003725	4.383986723799923	3.3041893708955588	2.9981698132728534	4.9157584669968095	4.013152856748453	3.692737470277722	3.4596169976562714	4.081772541412813	2.4079972903540248	4.417942880852373	4.1608420765564	4.845352379497197	4.83978545977712	4.816324293340765	4.847774389472288
pos_2663	Asp Leu	metab_2662	3.33965	-	247.129	5.1714950502955785	5.2393377428794015	4.738851854022979	4.257493502630603	5.552313795049443	5.1734828079241915	5.25160849068595	4.914087804043733	5.733052555276866	5.788831828682362	5.465328334602723	5.771445549421093	5.8820510619365045	4.91858287370972	5.520810199184696	4.5297482283559765	5.686904495457505	6.235114003689947	5.500423774829709	5.787615475818857	5.393509620928088	5.7385514249012015	5.710551635147843	5.274853189126376	5.575197336940273	5.442686070997344	4.8991761061520105	5.161464779131257	5.937027005918813	4.793920890105278	5.135777278725852	5.7448905434303725	5.5129381435577205	5.1736805201177125	5.555791671287197	5.031076719692537	5.532629487628998	5.543113363624758	5.548873641353608	5.564415609435432
pos_2676	Asn-Gln-Leu	metab_2675	3.34502	-	374.203	4.431813039944692	4.441644607459581	4.544914485022402	3.0288505451076286	4.771261116578064	4.537769895313268	5.2134988174048615	4.125198821445787	5.155064154983879	5.225727068985152	5.177958837452851	4.540022148425353	4.8612646397915285	4.7130740909029125	4.601738565264812	3.425014361760987	5.097598623584604	4.941023756465213	5.169867276855773	5.080234342259887	4.647951251160348	4.8487083259841395	4.9765762277730365	4.677599518956384	4.79343118173683	4.667336249147465	4.4253898452618605	3.734433541979056	5.2762615927911325	4.2734101413409045	3.9378031283567534	5.177739568965591	4.908058374066927	4.086353152014309	5.12201089343285	4.118299846369621	4.836120569539464	4.790922547618708	4.842103750395784	4.879356987252869
pos_2686	Glu-Lys-Ser	metab_2685	3.35032	-	363.189	4.057258260818204	3.9655994194038295	5.439056883434094	4.245012146032352	3.71559271854288	5.3870827160666295	4.699522760434158	2.4322769153962853	4.154662129325498	2.4510989861838848	4.164868086491847	3.026021074694417	3.3120474949073	4.690855090005293	4.248893569537171	4.426305289936628	5.0913515453308165	3.0167540181610915	3.5271711529683367	4.8155209287402005	3.781413890566674	3.7789156896584837	4.475492583372756	3.3078427431114044	4.006366382967587	4.111520898363405	4.6014733312646525	4.8563672901545205	3.9741142789742834	4.4924281249657545	3.3442800058223496	3.8538161878310366	4.207033359914019	4.018486137250555	2.948881393244573	3.8539576818281858	4.5306691608460445	4.421997877290926	4.524152917734141	4.5349971845397405
pos_2693	Pyroglutamylisoleucine	metab_2692	3.35562	-	243.134	5.305591936583613	5.327931316686748	4.945003521184798	4.5787199762332165	5.465048877839342	5.486816569485158	5.463200253957874	4.804843698623237	5.343655807322847	5.804695849097063	5.832104676188577	5.493309203557776	5.663925266568773	5.250255068805859	5.228794562389722	4.628825053075107	5.555254547037702	5.6189456284489445	5.63504521834485	5.621484308094262	5.1214002723285255	5.786795988142762	5.523047712646512	5.140140226854702	5.38387768976653	5.171313876165431	5.023531594829662	4.931667395952807	5.844869319718593	4.886439554953432	5.111192063095879	5.804554278436448	5.468415705931863	5.323377858447175	5.444801727747736	4.967815977393184	5.445047993936104	5.449990450509243	5.450196261652104	5.450775408751831
pos_2694	Isovalerylcarnitine	metab_2693	3.35562	-	268.15386206200003	6.302451269332333	3.03525128042701	3.177462823537778	3.8285142911871435	3.5055496111405486	4.5906944560076575	4.1685363401467646	3.3129764950431384	3.9619822216887446	5.74283638380677	3.0987467750651234	3.671314967462677	2.9985198725387368	3.1884585644732764	3.4297420969877503	4.077856555546887	3.667073212743375	3.988164664824549	4.04940749253637	3.7805533616374354	2.3372781378930454	3.6188421397361012	3.3570276949109417	3.314886917224088	3.318472909361033	4.201714244072032	3.9413305839199033	3.2830123326653813	4.096252322690764	4.176276821078246	3.723249653245342	3.1803811634471923	3.3338991867945977	4.647128328495978	3.711176270080855	3.3931703152567185	4.789599241428277	4.773224352246912	4.7892542601025125	4.830709892031306
pos_2706	Kinetin	metab_2705	3.36092	-	216.086	3.9815080960341054	4.620429982864496	4.1998662403248375	4.318314483533077	4.528385023926922	4.57825760323453	3.635643142833891	3.736382174657877	2.6511788251741533	3.5589807893815206	4.132212303577423	3.933729149703869	3.7048857852389614	4.313618604446367	4.004176287544549	4.426785255516061	4.275428927044672	3.8967930611690913	2.918296182615513	4.3002965784106975	3.6394464429248568	2.5740676406096843	3.00676943337376	4.551152078079095	3.860402455519008	4.142269582756588	3.702870449550871	4.133969789977149	3.3345361412335897	4.657600154917018	4.110838184049437	3.933462309155435	2.6078602260370563	4.466932546917898	2.9988086940722987	4.881716308180763	4.132417066111662	4.208788940902148	4.099572980954297	4.1847213472183125
pos_2710	Glu Ile	metab_2709	3.36092	-	261.144	5.0327719417099495	5.0490858637148355	4.651949038750592	4.155611442296778	5.167834371195658	5.230255669211603	5.2168664955180635	4.398027906461773	5.0515977454497625	5.5577258273344405	5.558683521131103	5.222164292234822	5.385859112723713	5.0056967931085	4.9516905715296735	4.199471100091453	5.291670154555397	5.338566268792865	5.3587921669033936	5.34710564236853	4.8298656646001215	5.524030254077027	5.255550475052579	4.834893146091045	5.1388331373828615	4.8951719815991765	4.736484340766896	4.5850263428171685	5.5799832076932905	4.683010024157936	4.806076030587923	5.528503203963072	5.211341131256812	5.007797641751057	5.167660982927044	4.584057674926765	5.1744109606150985	5.169318577790996	5.180688926725035	5.182625032453193
pos_2719	2-Hydroxyquinoline	metab_2718	3.36623	-	146.05981670100002	4.581494360260703	4.613547339346124	3.4945617128135447	3.1531911786943514	4.157878175082705	2.922889355935673	3.5281476768576314	3.2281660440747166	3.7999778293188817	4.705535387904175	2.8168043750568725	1.721320241855311	2.9352833626561026	2.584694104370991	3.6407946398182736	1.8175653236215623	2.9556434642171494	2.634684538628339	4.314557600182144	3.8208552103107714	2.4952862678484284	3.880569445373128	1.8131610804160687	3.64139699632708	3.3792212633568472	3.375703887251415	3.1188463311468686	3.606290715220025	3.2637772108357783	4.529690233807445	3.839493708227279	2.9454679274200517	3.1526264389689524	2.734974244695189	3.0494155814943125	4.147937152951119	3.7319212623941183	3.8880098028677654	3.875467141360416	3.852776146091404
pos_2722	Cys Arg Ser	metab_2721	3.36623	-	365.159	3.3260603490013074	3.8847623705034064	4.210098365198538	5.191025718629118	4.06762423424602	4.035376776870487	3.818724615343034	5.042758446615185	3.093628848162284	3.364357115608056	3.8813252619628082	4.046177449608601	2.8858712553647488	3.992330522568844	3.3846753685468967	5.669398678262392	4.249455589002019	4.533162034995646	4.156474985238403	3.742991395795424	3.3943399784717454	3.5116359495671587	4.020426298367728	3.735783360571165	4.130405881474449	4.2428205330631314	3.9941318275068114	4.398594142061497	4.076242304632064	4.366872309200659	3.493069126328113	3.7208461155209416	4.6046241986811935	4.3308066866678425	3.6512682212403456	3.6828734041475113	4.344555820104704	4.425390756762299	4.364646626306399	4.3070336864264345
pos_2725	Icariside B8	metab_2724	3.36623	-	443.225	1.0794575181737314	2.354406121637328	1.192971316519857	1.089905165993547	4.033092534637143	1.2401548953082002	4.05992535122316	5.595803113738357	3.957072774121266	3.1529537441769584	3.6128110926968304	3.9778105010664255	1.0687277639229564	3.1310764666133544	3.2346754338078894	1.2111752094099384	3.732536696879431	3.5691958799512054	3.8957521679953326	3.142350793222544	2.865400443087692	3.856206025665168	3.699244249524709	2.754282470607893	3.659834353623667	3.2563523839116635	3.693210856243243	3.3530724916384465	4.579601462421024	1.2046275765680683	2.3789580424295	2.4053757248834704	1.1733884735831104	3.1048755633634606	3.3816483146769203	3.0588444682970137	3.860461026616109	3.87063346605734	3.7372159888075966	3.779239456314628
pos_2728	Guvacine	metab_2727	3.37158	-	128.07	4.052287279864474	4.175486678806192	4.306514563527545	4.017064291260909	4.313804128477636	4.1601494606001	4.178432043295406	4.46783	3.854286107105305	4.146271376604355	4.2958941922544405	4.118641092975576	4.164724034681292	4.4174881359446525	4.220161678599799	4.290085392441354	4.35824152187016	4.287897162167372	4.204753678041085	4.391833160456761	4.2067350885280765	4.364102216751081	4.236854117021375	4.28826000199715	4.147535979684907	4.044775479544956	4.653581146618566	4.215471700627069	4.369385540104038	4.370588364796555	4.138859706529805	4.348734247450307	4.413083722433443	4.342561538322394	4.268383785239413	4.264604479492369	4.180188522622158	4.258089884005534	4.263317995436616	4.3101220966690486
pos_2734	Asn-Ala-Ile	metab_2733	3.37158	-	317.181	4.000402177514027	4.6676625914152	3.5646609522495325	4.450836966531235	4.997351669125491	4.5762891669342896	4.841467302386049	4.151347449278841	4.590038324518853	4.795887435096273	4.976240312534767	4.4007609347177175	4.641840134868458	4.903430438384111	4.204377059745382	4.1799559903702885	4.85555590139201	4.713025145189233	5.0783517310263315	4.816665441537838	4.580631176143411	4.688436907806102	4.754823703850271	4.748012341102873	4.508781032266673	4.331881329455947	4.742147671488494	4.057217167588825	4.878775465240931	4.4217964141783535	4.227780134199118	4.960020533816392	4.946099879344064	4.956363009725232	4.820978287084486	4.608975157829713	4.688724389708045	4.676236958856536	4.70296383988375	4.721077482663286
pos_2736	Leu Tyr Gly	metab_2735	3.37158	-	352.18643394300005	4.199802777393551	3.8528483149083352	3.9872204727489375	1.7376353273878786	4.036478487157038	4.0260370337041245	5.024920085860685	4.237410659098513	3.636310826859028	3.90288581884176	4.077041370618888	0.0939226139409514	4.4236294285939675	4.4587292331171575	3.6643232932872896	4.211974020244975	4.180415309705369	3.957139830239853	4.581970730300118	5.1370333072280765	4.203339896700602	4.335220016223252	4.7215420743568535	3.5161644301140496	3.809167095889616	2.9631939762957518	4.277453794303957	3.2841373228791677	4.251949942537797	3.7325352304904738	3.2768758045393995	4.661807192498519	4.190308382204884	4.3174620593219135	4.1848139647358185	4.1335040578574285	4.273381196796029	4.238293062889023	4.231412932628868	4.1045220455136056
pos_2737	Lys-Val-Leu	metab_2736	3.37158	-	359.265	4.616640931177983	4.962410288855242	4.398120664092158	4.262393438313603	5.187711421489103	4.9927169366867	5.400600715200783	4.863236207611752	4.64052403894303	5.1066851949722825	5.174720626575861	4.414153540620596	4.9327814565652215	5.394868175392378	4.5081229609311935	4.268025566377637	5.07232241083902	4.361427241244827	5.6072072722418245	5.659227395381754	5.010892103676028	5.1228567167374965	5.477115958028149	4.858907366965826	4.824658983679546	4.495210718096193	4.991988545784536	4.249138797503808	5.411707694749732	4.898175738842765	4.081425305241485	5.595989788686321	5.3110191609152535	4.88540611037597	5.139081118517977	4.753314061968708	5.097331630328201	5.089513297982495	5.0815971421405965	5.093760147753164
pos_2746	Gly-Ala-Ile	metab_2745	3.37692	-	260.16	4.545787357072343	4.605598274212613	4.325183195447787	2.6278676294971026	4.9851006626441325	4.669543319992688	4.529287551707169	4.7316191282060585	4.448355127786111	4.688997630024934	4.782326142941929	4.418572378543352	4.8335894823747285	5.034710326714655	4.3534227045285006	4.553003278337034	5.0235224972860975	4.525238670007675	4.867989558853028	5.071498405680359	4.883682656919512	4.579645970610099	4.858354624490262	4.39268970188027	4.5829653777080015	3.734777977785629	4.6859100940147185	4.1772543684469445	4.817506571590413	4.140200653236376	3.9202087149259435	5.28705800839555	5.085302150614419	5.0582811272485895	4.82023838164893	3.8786782297528513	4.730583469453842	4.7187919626306964	4.728333986590412	4.747304533726634
pos_2748	Gamma-L-Glutamyl-L-Pipecolic Acid	metab_2747	3.37692	-	313.13907474900003	4.000235989452487	5.068528769783921	4.879116088392894	3.753877465980241	4.661266054947081	4.834328202836252	4.072203824427427	4.801174079320419	4.335304576380647	4.530515112159868	4.58529257285653	3.8837403433568567	3.560263717039548	5.13295761744997	3.887917471023061	4.160993412134801	4.371760848679485	4.129858061544552	3.262845369455419	4.392574258284755	4.022907150551622	2.9409268521316148	3.569923660429821	4.370965024315578	4.150972388093063	4.159474081212626	5.332686688647255	4.161191800616367	4.258713803695718	4.232806357204543	4.283533705568424	4.145095427338887	4.167042949362748	4.285709503372485	3.824079240905239	4.205967495815062	4.508942302599208	4.526643731563679	4.57948173655454	4.554218225714829
pos_2751	Asp Leu Glu	metab_2750	3.37692	-	376.172	3.470222985984416	3.8411084412157743	3.9236344540025567	4.236916127337153	3.824553099320668	3.538525546183652	4.137213427502924	3.9068744314583568	4.663146720396645	5.256526866964854	5.054684737600108	5.12313668059889	3.873604267396172	3.7244382266634974	4.156837660384595	4.618167992466755	3.8388709437759636	4.945713776567109	4.923043731112137	5.650986009853066	4.369889957881559	5.175500139919362	4.286432527796056	3.511385149507332	3.9485526410912217	4.713224763632296	3.589987037782341	4.621314359205086	5.502275274840351	4.384445099870674	3.3489564038807518	3.846620594808444	3.763881760207494	4.15159264154122	3.785047267828879	2.9468042957905887	4.648057364091006	4.658245842515342	4.653811367040215	4.536940061313032
pos_2762	N-Acetyl-Dl-Serine	metab_2761	3.38757	-	148.06	2.648984774261194	3.3519560282792367	3.3510775030135536	3.9355135639131653	3.6829183810707256	4.232784962797835	3.602147584765215	3.235626598174956	3.262808845111241	2.9431988638604443	3.4192295605351943	2.9341179284015797	3.2590475190220465	4.425252087121847	3.522595513129899	3.897534246100685	3.3441417049212587	3.8317746511089448	3.9060423454823168	3.4967594562543955	3.249151447140984	2.8729705341682434	3.2281799264163897	3.617022521415493	3.3129830905945346	2.220324313764503	3.9323486680464814	3.413830338873493	3.579651782707899	3.9483657664553253	3.533244796892053	3.3890453915476413	3.724154866785088	4.166106001272748	3.3854471948336347	3.2876985962210514	3.791641236791838	3.7122817497182483	3.7590326230164366	3.6909175729525625
pos_2785	Gly-Val-Pro	metab_2784	3.39827	-	272.16	4.661045214958602	4.799887540247334	4.785577432650593	4.919918006208092	4.796868131974885	4.969104191423224	4.970985654344925	5.277982920776799	4.798423360426545	4.953852193606672	4.863325767591163	5.08170489460704	5.054642157335562	5.168282010211958	4.626700973924189	4.7968694915070245	5.032244373420084	5.0651158757712365	4.510045752098928	5.120897164210438	4.9677977339685055	4.936580499523532	4.934829082843403	3.5270881181118137	4.923006347909501	2.5611895181588777	5.379233910254413	4.520842106853404	4.714231074266571	4.25339058351864	4.013156654608972	5.141662506419741	5.249602071135625	4.529436515220161	4.852901664324434	3.3773078638454246	4.920590749399682	4.936055840425394	4.942346106614068	4.9422183293581305
pos_2788	Lobohedleolide	metab_2787	3.39827	-	331.19	5.334415050959309	2.9837594056691588	1.9906295310836242	4.528033680861063	3.5710241644378327	4.02647663532961	3.07062708885233	3.1469661953137584	3.3246657523105894	5.4369067666410045	2.7452259322639114	1.7039135839593835	1.6680284899338689	3.3485100982707072	2.054724157845904	4.202522120250536	2.8110344152048823	3.396406249164492	3.791737349579917	3.5031445537916808	2.9684877402862395	3.094473841824468	2.418686145413618	3.690807134843533	3.187369279043811	2.96280247614178	3.4662015254241743	2.122145812627309	3.7930358519162826	3.2165977908869405	3.3212948402675906	3.951515457079069	3.6248211589556623	3.8256810886083135	3.3854410832676147	2.4218560945728744	3.620061445693232	3.883892906752011	3.7213323513342544	3.8229706660451095
pos_2789	Lasepitin	metab_2788	3.39827	-	345.13	4.917152047867969	5.949949456157693	5.0225285124516645	3.6213094221688813	5.615628432734469	4.251159551440886	4.127962063571393	5.465691018305996	4.780746508188599	6.120747407423058	4.976605059501206	5.0756733630953725	4.481411601292176	5.240971934397587	4.7924376565550775	3.980692369314227	5.433494672600031	4.7192628302492485	5.042207129405582	4.5592784387331715	5.573872297005575	5.834302322281853	5.485724497085072	4.329476054143586	4.618587412142646	5.362775878881059	4.129554518179456	3.0095415468894933	5.559437767302643	6.059341693899454	4.0099541690727065	5.229081664234604	5.925014107446207	4.2165733571437745	5.136405491344436	5.995495121337776	5.358109025587175	5.363413742543305	5.389640087819033	5.383857651058719
pos_2790	9S-Hydroxy-11,15-Dioxo-5Z,13E-Prostadienoic Acid	metab_2789	3.39827	花生四烯酸代谢	355.18588450000004	3.825212722357305	4.070524047421387	3.5426987513435098	4.892423130242205	3.97559	3.934487562535168	2.5797379126134863	4.342802208895228	2.448532797062608	3.2758561622192834	3.9534619587616437	2.514823314674144	2.4592820441269847	3.948491575306475	3.8203803179304896	4.387550236968516	3.3907067165090305	2.648813815081269	2.9693986116821947	3.0071794025890086	3.6675180880505778	2.52062787595418	3.106128533761653	3.6944674650259	3.9347301166256834	2.3594465993039315	4.0198036444714464	3.0104733435693136	2.8888849722175003	4.0563119737996285	3.9234795701720526	3.457469384002168	4.344458687196426	4.691363986559417	2.5348207197507326	2.7039371022933394	3.761027270800984	3.743109415419851	3.6316916068017595	3.7112670330055737
pos_2806	7-Methylguanosine	metab_2805	3.4035666666699997	-	299.123	5.041839350783596	4.323646531633653	4.7544006598363335	4.6352799356688035	4.132658479920835	5.434875392074258	5.238494480706943	4.403643101904332	2.8314539478901475	2.900993168670328	3.971103327952125	3.9200001675262035	4.198689409594866	5.153155534561682	3.9460067573754842	5.0693973156773495	4.656991910769174	4.55614335099074	4.1056797849276725	4.3193494936962	4.299483016642949	3.2864966041224424	4.00318839391039	4.429813846446451	4.3849897729289085	2.7871138136947406	5.040806174539124	4.3873044491867725	4.846767082358942	5.4441304021423615	4.754709102347224	4.093375876932286	4.568375529254605	5.036072380862239	3.817912130240975	4.900090184012861	4.721157215119392	4.712053140550549	4.7213444236509465	4.75518061371392
pos_2814	3-Hydroxy-L-Proline	metab_2813	3.40892	-	132.065	3.9270723340719424	3.907800471792652	5.432223824267979	3.4827201967352344	3.8568028838055786	2.498721072891056	3.962802681918863	6.539858306023812	5.083788227663117	4.984145486307905	5.192130649806798	5.747157775375332	4.182408841260173	5.246080773867831	4.520225262317424	2.5957160781518587	5.213953171168548	5.465002163901771	3.1943342329316784	5.437353260942572	4.265516323293743	5.768790133638272	5.205895605778296	3.4204933210267114	4.924862532432703	3.105887323121088	3.908850964810698	4.904156030882222	4.515305020201273	4.19181301050505	3.83464423121385	4.191043287152462	3.9302435807618097	3.7385384102072314	4.8025025744689405	3.0558135769922914	5.311969366516983	5.3083486301187	5.331928379470732	5.309242454541834
pos_2816	Phendimetrazine	metab_2815	3.40892	-	192.138	3.969078577729448	4.120060861026347	3.786943854679208	4.4125019777429255	4.2477481158005865	3.9830387488489376	3.608326860413081	3.792947219277648	2.4016755348466843	4.552219111718627	4.054984826068068	3.2106302252363745	3.9844091885219752	4.498603909680623	4.475524421096317	4.156888329714769	4.2816985917545285	3.798533366538344	3.0915966152948062	3.6947129580868574	4.2134887022211815	3.829110640040456	4.170354198788358	4.089650584290412	3.8312414908375736	3.0755764029448875	4.155475304230686	4.483575888965662	4.464555756609665	4.558609566357526	4.438907877282583	3.958605414091246	4.1578396068292935	4.5512503542562	2.635367654406161	3.5313008153847103	4.157943699397937	4.180216753946628	4.192071135109843	4.226691209268568
pos_2825	Maltol	metab_2824	3.41427	聚酮糖单元生物合成;次级代谢产物的生物合成	127.039	4.005717574280132	4.127458915030689	4.5595171249792665	4.1565305551952285	3.9270863534183262	4.139427152809581	4.485196525231392	3.884717695323849	3.935485448696116	4.427009526420815	4.226567749067063	4.366345829084532	4.665915364132012	3.993719756804442	4.150874447045943	4.249162565969014	4.3832422340702735	4.043173041942459	4.200301250003535	4.045456638768129	5.0120634632799295	5.23765120382271	4.201004767096031	4.0362953279363865	4.121701804366592	4.155397357302278	3.9582060007566966	4.245195458675808	4.389493549795798	4.056688015754353	3.993980428938337	4.04693667052989	4.272809730934979	4.161206607227316	4.135642254333648	4.028867887406987	4.276992263764845	4.272045711188628	4.359621647594001	4.350515031762977
pos_2832	Cephalosporin C	metab_2831	3.41427	代谢途径;青霉素和头孢菌素生物合成;次级代谢产物的生物合成;头孢菌素类-胃肠外药物;头孢菌素类-口服药物	416.11583954400004	4.203565697224887	4.181281128048702	4.05645455015647	4.082597545801106	4.1630627266377465	3.7284311999425097	3.979006740563357	4.2283734321922894	5.002074623893368	4.628066819711324	4.217085109691474	4.144069292729284	5.0869938253140985	3.4595456055204115	4.400608765825362	3.995117706242072	4.8387858271689534	4.004854179849868	5.35901721082972	4.810089127616811	4.417388716723642	5.075094509894564	4.0473540798745455	4.300864561227851	4.170625738156963	4.365674619445692	3.672585704240108	4.317394810712683	4.172363346055402	4.0183296329534635	4.0589974890230565	3.5978290081331026	4.908084922885195	3.831129712665952	4.343523373371206	4.0916329703802585	4.547996975901828	4.5134241112019415	4.53618858359258	4.5199578415174
pos_2837	Arg-Ile	metab_2836	3.41963	-	270.192	5.63253578681137	5.439776387153804	4.857486675897643	4.0885140616857205	5.390593244492344	4.2967082766985225	5.367015718760931	4.725322579991965	4.4821091773930375	5.4074090232116125	5.152970014358751	5.031710035329456	5.833489446761098	5.810517057179157	5.181490112208444	3.754579017394613	5.8681942896313615	5.297112236786411	5.058071309540923	5.3702141608512814	5.153404489456133	5.077118946863658	5.2623723703722245	4.392217508718264	6.209783831460992	4.415960720044794	5.162969511595919	4.182254203873036	5.012468065119445	4.398426691321205	4.104556492759704	5.9243362400267054	5.635322457237255	4.7528262303312845	6.041240387611675	5.14287313577026	5.395884781566955	5.372624227328825	5.394552545257465	5.390652273052704
pos_2838	Ala-Ser-Leu	metab_2837	3.41963	-	344.181	4.956104997516083	5.671782269417885	5.242758614554028	5.450758682974311	5.779860061279581	5.4623120528540055	5.771858878951213	5.4699911304515485	5.0881579418759895	5.370471734643501	5.36421050961212	5.217210310775468	5.377530071223996	5.52041792312778	4.839502911320404	5.2273646385580514	5.384094469374506	5.726037825041224	4.986568305352281	5.714333208282294	5.084650179088047	4.956888227609828	5.363692069692588	4.591274243081833	5.486214225881205	4.735959543541057	5.2891180574991346	4.751290568552292	5.052804030839393	4.6965445335502425	4.672147691301635	5.639087616340754	5.461442375774368	5.15435810739995	5.239240552080912	4.373562829278868	5.353237465389613	5.353926996811858	5.339280201103418	5.346122171053625
pos_2843	Alpha-Methyltryptamine	metab_2842	3.42507	-	175.123	5.4526489266433025	4.457005705995882	5.035040186471732	4.507497104810823	3.5706896555078176	4.896321198346092	4.630939577847946	4.52948047887816	3.8449561847470446	5.420603822600203	5.442304528723419	5.34788824181472	4.243377803910317	4.382977195207301	4.438469135769508	4.92166424627323	4.731412113701427	4.54260451404837	4.169685933911277	4.705425333167748	4.512388753482678	4.263746996308235	4.064879473436831	5.313838370519658	4.797849795441296	4.819558013086501	3.761082262920305	4.913169646966635	5.4158428323831345	4.191691952114084	4.519920812902645	4.364765825575204	4.675664599028284	2.5719652782583893	3.970470945475197	4.887237618891149	4.888265288217137	4.864350608712027	4.883651858353581	4.857000123063052
pos_2845	Pro-Lys	metab_2844	3.42507	-	244.165	3.033218793657161	3.917716961004965	3.1001936729036803	2.8810490944165985	4.240584716843458	3.9912895477442234	5.6890524412437555	3.0815299625385517	4.2766834733998085	4.226052674466824	4.481890688414782	3.9531641448799952	3.5244951411506973	3.9473289271463936	3.7294935965895446	3.011435084110787	4.932516795383336	4.382853883876347	4.485266151443347	4.31433878210591	3.677434081334096	4.2930509415766585	4.4539923780439095	3.8932068896644902	3.394573001526393	3.4359850706258435	3.2763838735165183	2.862278565572727	4.5191012250414735	3.0044618252082365	3.743388115914376	4.388950374596659	4.267809271997397	3.3160986899732565	4.328647506909209	2.9988343543816414	4.4207817174805895	4.453662379009034	4.461901629752762	4.4292995198954985
pos_2854	Nipecotic Acid	metab_2853	3.43038	-	147.113	4.284113539774292	4.0797301867291536	3.885244215621728	3.7660893078671793	4.1275742909976	3.9463025847833233	4.146904205056968	3.2816783366959204	3.456024221546261	4.426879823936961	4.427478186938728	4.1501988794942495	3.4381729432953434	4.024699719306009	3.5819976951783854	4.208274156952757	4.17833738548572	4.110673864565674	3.70974386519003	3.8151411276356737	3.6212551363560017	3.791968097174408	3.5159599229896816	4.266358759776985	3.964938014761638	3.801456055915721	3.8827280067276235	3.9025364420327513	4.403554917827089	4.244064879562114	3.989607296251092	3.5608373452582347	4.036494932470134	3.833681010818372	3.646256961845928	3.9447533281852256	4.063783887635788	4.00317328492481	4.059473988838748	3.9628464500300624
pos_2864	Lys Val Tyr	metab_2863	3.43038	-	409.244	5.388327561468119	2.820716101185353	4.1802541734447285	2.3865530900368284	3.838750446198455	2.547346284927764	4.786715272037387	5.083099002788176	3.920854729434016	5.049349182950817	5.344258985910408	5.3590723967275125	5.212029407194415	3.4552659710280382	4.276164189524009	2.5166241701792003	5.338589454511482	5.342967476989756	5.535061736814273	4.6852930007667055	5.240961981185758	4.693546521199888	5.228015887790127	3.1956613901026207	4.9292700235967235	4.1188155905158075	2.5398903224255163	4.84673292335079	4.0014	2.5096654728853407	2.499153700411856	5.0246582963745645	5.330637938864977	3.41177153290303	5.170127035577323	3.186873823295877	4.891943360516092	4.885754583370979	4.897245845592226	4.913196728135125
pos_2872	Arg-Val-Ile	metab_2871	3.43568	-	387.271	4.578012304515179	5.1132573447516725	4.548501887372411	3.998795487408407	5.385587471153449	4.9118211537466685	5.357975722821354	4.998472330531286	4.622350843448932	5.165103741769593	5.422748196785909	4.430337528978816	4.982007203058597	5.4115766884472105	4.642679067101577	4.164872603331951	5.126970338009522	4.32604234588925	5.8229182031269255	5.936747531515003	5.123977377299326	5.1796769450646805	5.739232659654427	5.107305953644612	5.039814752453238	4.632857824174744	5.2222163734718565	4.19959784840759	5.541634665736827	4.768251752859944	4.324445658334942	5.610739587820129	5.473318463579125	5.235381050588394	5.215997555477916	4.461780087859816	5.239814212379095	5.238501002322386	5.235571562067891	5.245573087828771
pos_2875	Carboxyethyllysine	metab_2874	3.44103	-	241.11790293099997	3.4735614257893404	3.9645989144528593	4.145964906220815	3.746530333326996	3.9158445320178346	3.5130376351673496	3.0632494968477446	5.283861897278073	2.9483464361567067	3.3024208009863365	3.782908942921542	3.1284708684155285	2.0694273931760234	3.81865861465776	3.58152417096932	4.108889782395528	4.497148643982562	4.288949686886221	2.2936270942601884	4.010294518051628	3.8088413042853166	2.1304832384474337	2.8597042363189216	3.7274855601300168	3.505410174561796	3.111347621528532	4.15031982320285	4.089834553491651	3.1416576766054187	4.129446704664903	3.744563793347993	4.308896938699056	3.98042799211248	4.276469782196804	2.1446146032206355	3.9186405303572256	4.060854733708172	4.057716293307653	4.000733255162453	4.0783176565124855
pos_2879	His-Val-Ile	metab_2878	3.44103	-	368.22883680900003	4.166024700259928	3.7182413849936626	3.2868470426647813	2.503921798129777	4.123454145070278	4.342808930295041	4.9977405124815935	3.479870371423221	4.5732535445981135	4.582384830969826	4.704015276718928	4.295158695050309	4.6528755152344345	4.483912311496142	3.8930226047340786	2.6341026146687807	4.4737580779966	4.48197124753515	4.743923268132139	4.480081035581608	4.216545357105119	4.6259666353193065	4.543282087378947	4.20643793843395	4.309516825451191	3.2034377826484444	3.9567348655604007	3.6895887144604953	5.1614002121083455	4.179850582532291	3.678807485352413	4.741358084674184	4.609261041092097	3.7074467367188095	4.580766117214268	2.494918351297429	4.5117149489227035	4.455531060129193	4.449043070743558	4.469276967190036
pos_2881	Ile Tyr Asp	metab_2880	3.44103	-	410.19127759800006	4.10873745142785	4.310484324735476	3.6284527596097362	2.828687026207207	4.114159773118733	4.358819710906843	4.846024527398399	4.031829570737109	4.12707700525644	4.5131951550471605	4.143035965425441	2.861261127297964	4.585222767624068	4.542193905446731	3.827888824353263	3.0764926678458795	4.237296208801881	4.402512034588003	3.9178344866551846	4.6364711291640806	4.262668019587669	4.122101244074768	4.58141628554995	3.923735359883532	4.00693035703721	2.765509955919022	3.928357923571856	3.4643689136984306	4.190370918061896	3.9368715457543684	2.9415487670296137	4.534154076741172	4.635094933178624	3.490848403576721	4.523843417562297	2.8196685187780286	4.096837610573683	4.1835047084450965	4.191288311583176	3.98951137286996
pos_2892	Ser Phe Glu	metab_2891	3.44637	-	382.16037934300005	3.1993557500227814	4.2907712056333445	4.169630117829096	2.8172195209564257	4.0599987383027525	4.171929934585977	4.743759456439525	4.121154655021567	4.558431291706602	4.4055990403120076	4.8751855633219625	4.144821661194784	4.395525688632831	4.32329574435814	3.7410698428095337	3.896989200602897	4.7635705186326085	4.702269429347481	4.810009380789679	4.666320945926569	4.120044811763703	4.340402794617053	4.581719230302858	3.851195180416133	4.691530684819696	2.694107697894456	4.022328833322941	3.593807950569284	4.616950488017944	4.051062494589745	3.2518416081194483	4.3301409005938325	4.466774707564899	4.236277407972787	4.641234018510602	3.3473975518357384	4.361377509631684	4.230864588562834	4.426855233781729	4.386422827551787
pos_2901	Dezocine	metab_2900	3.45172	-	300.191	4.071796909705655	4.297420256861535	4.00417919257851	4.284093654023596	4.970795675228652	4.6377062947216015	5.272128914091904	5.144615528874789	4.1007167590436255	4.5704151121405125	4.765112727942096	4.433006044090568	4.572088559721932	4.6132656541894335	4.892525966665083	4.049144399516861	4.753671985997926	4.287649222676073	4.713188346155585	5.259811167159151	4.626579706955266	4.5856318191598495	4.916683274748509	4.595491816567752	4.536526712775721	4.011172703749197	4.133403820269887	4.21966719340511	4.693768624427396	4.427654845102559	4.392547744830045	5.309227453652231	4.635789049799248	4.186511628775278	4.517807416551452	3.9376972946965982	4.763215366445373	4.743326626899754	4.733572605403023	4.705101938770833
pos_2902	Tyr-Met	metab_2901	3.45172	-	313.121	2.9182545481305064	4.525817709767393	3.04062069674299	3.3756372613841585	5.050328439697751	4.226201958430379	4.4185073469951455	3.0758970267933563	3.7879647828435026	4.053791114153998	3.8849520873513135	4.087504063052246	3.8985551171778288	4.1943055402823335	4.449383984442732	3.0600271075710723	4.326111559666462	4.423288908876093	4.365794667729351	4.426721633853036	3.8835727954358674	4.394745634099157	4.121282311227551	4.694666007814585	4.5277999486003475	4.523279956763997	4.176893709369447	3.3293584039856494	4.147369150459643	4.177094532685216	3.7553059187720814	4.85380101356823	4.349038646305765	4.60049778763922	4.495392282099641	4.177890021232185	4.282871453996016	4.182361944121331	4.247230165308305	4.295205644414427
pos_2903	Asn-Thr-Ile	metab_2902	3.45172	-	347.192	4.445735449413914	4.849620984952127	4.6693499614144685	3.6625617396228582	5.327914792959423	5.0100025084754165	5.379974319759344	4.387955479748844	5.319525364390903	5.312906740664495	5.449901371347158	5.0879633739677725	5.151770077248023	5.022618049041486	5.005680560175625	4.052637942459648	5.416231753627887	5.3185961357766365	5.626012046199176	5.394341117678684	4.820207435549323	5.220154175000847	5.226386208228451	5.245972321159439	5.012928428670624	4.9676275493499205	4.869004714897854	4.371858741047991	5.729102650355264	4.87864311622811	4.612212245925051	5.508541981043883	5.026616827203527	5.0655540824149465	5.422253351076495	4.8463415046785725	5.196892807226758	5.16953990099754	5.179476603207942	5.1867816236542055
pos_2904	Arg-Leu-Pro	metab_2903	3.45172	-	385.255	4.45645159928809	3.3672699812691764	4.659094344805199	4.3235408526063015	4.065934956206991	4.29690635168605	5.388976613226359	5.364960317088442	4.250743405415586	4.669580450756362	4.8325815164128025	2.2704131416970816	4.794605818987935	4.9304162468585035	3.552843404611404	4.2322485423484615	4.594867119015541	3.802761394681784	4.68514727916034	5.551040000213167	4.787799078817928	4.593063047497201	5.142468258720721	2.3235126535434083	3.793838810153061	2.1154688743836108	4.243159066533988	2.2192893820608126	4.836770395186541	2.3609061741014084	2.3504078855408044	5.333752197619353	5.181975940120207	2.363731876047141	4.7433633254499	2.2289948482557365	4.818654467040782	4.749375318534977	4.751212058198783	4.7727690190904575
pos_2943	N-[5-(3-Methoxyphenyl)Pentyl]-N-Methylurea	metab_2942	3.47307	-	251.175	3.2017030349880766	4.224161948735503	4.108479525599306	2.8783705369550905	3.7645311829534713	3.422084718842278	4.4347676273828585	3.197532417214334	2.520835746944193	3.3383822655245625	3.9241086362462254	3.2334183854469707	2.5315908116825043	3.647613712409997	3.336389866302312	3.901825667414386	4.269592430144203	2.7133550033942493	4.27428097791044	4.202157476249788	3.86194248166898	3.9302334377332313	4.510523069322916	3.6656647433346894	3.773172927135611	2.4316953641268606	3.703075339707071	4.194134405287392	4.112355049776894	5.722777789173818	3.5161404372568326	2.8492401627051	4.048168036659465	4.088243787807709	3.3194878789284386	3.0689010684657827	4.364841820162291	4.2642171325716065	4.357328049817204	4.278402789552354
pos_2946	Phe Ala Glu	metab_2945	3.47307	-	366.165	4.5604790270205	4.537871521577089	4.589382111203636	4.23638023524714	4.653127922504686	4.6657484665728335	5.094594140319058	4.5101890723877185	4.654453729010536	5.0078999582046935	4.920343278359319	4.297813285459934	4.629245126461456	4.819202465095799	4.042134453500994	4.169516739506073	4.814995287003867	4.675277159371124	4.893623840731649	5.088869814462496	4.377930805237309	4.6486253589748765	4.7835789386135525	3.5245101799351173	4.349675251635992	2.878484863489976	4.5182301229746935	3.5223398759192994	5.18201756947178	3.5311640648571254	4.276755206545256	4.650454955048622	4.862029036450232	4.2033704143921335	4.7974310015650525	3.093314803776845	4.597349549897291	4.634050033446117	4.638545657829557	4.652522124714256
pos_2955	Ser-Ala-Leu	metab_2954	3.47835	-	290.171	5.003679799335258	5.035726158818092	5.054135860275354	4.572513225918466	5.359003626799537	5.171221838946816	5.5257127382603715	4.7962438450548825	5.2301693588089595	5.359022689830858	5.356555122088924	5.05187830204755	5.37599135292639	5.303358787898012	4.928834680598642	4.522538427316838	5.461072035884519	5.291286703659294	5.461529127614537	5.355050732964737	5.194578697755863	5.161509825651397	5.2886026293649655	5.0598164221119735	5.208097805357826	4.765171120260229	5.008957854507934	4.7338117697439746	5.46710714693681	4.8217696979356095	4.5855218561883255	5.5652196346555725	5.496057110847388	5.06121384082428	5.461781613249247	4.237578731790789	5.190448577565887	5.1556529934848685	5.1816256131623355	5.2152122365570115
pos_2969	Tert-Butyl (2-(2-Hydroxyethoxy)Ethyl)Carbamate	metab_2968	3.48368	-	269.14751689999997	3.94472297732004	4.072855639262022	3.887510384612092	3.615734652849268	4.377802723366203	4.9663261806339385	3.6985162538418948	4.2497007540193605	3.7991758583430686	4.154160027504329	4.116528875412486	4.500506227347672	4.24489066568512	4.279430026496789	3.9697740672938995	4.505208930190558	4.044892596116429	4.452999641358139	4.391649308831529	3.870471521481031	3.825645628816313	4.04611885261038	3.5644716020277816	4.333496818290655	4.238733718942995	4.020022905123698	4.214123881427247	3.7092287801897625	3.871037633322012	4.31329269062376	4.040291360963754	0.18419198819184354	4.200190903209503	5.25135031198161	4.092719792599038	4.169689869721095	4.288936616264996	4.269500964839136	4.210410222552822	4.1954674743824825
pos_2973	Asn-Ala-Leu	metab_2972	3.48368	-	317.181	4.128871758614242	4.620452137665888	4.098700665713768	3.6795981859410873	5.033018770759427	4.658810800876301	5.196395273124941	4.180584947632084	4.647911309062391	4.9151986732187165	4.924010541535188	4.3840328049207296	4.6080904664583215	4.7230453710019225	4.508391832117732	3.9529309091002456	5.004494571030143	4.7551553666441295	5.209693022285968	5.130442579232526	4.366966454856773	4.805303254750527	4.799097423100693	4.925204868511115	4.687825779723503	4.314619469878121	4.6041264323840485	4.0475512821943775	5.0135597612466345	4.765030420710108	4.205263417354144	5.162273990605394	4.692910327941973	4.840717078058772	4.932307693248147	4.6999607184457854	4.790100102026797	4.773996939122972	4.769692756759451	4.757319450567921
pos_2974	Val Ile Thr	metab_2973	3.48368	-	332.217	5.45735993215697	5.0259840690413515	5.302222399347676	4.680373568912102	5.237904663502649	5.626927329420718	6.204548734909872	5.392209654482262	5.625606095044644	5.85326171827348	5.619415898883507	5.110854219298124	5.674687021250413	5.799991271709479	4.976892749745488	5.032824324474366	5.825516889892963	5.549547594858352	5.948649692482838	6.247647684281301	5.5972432338236775	5.684969725351416	5.937010908347378	4.868674394981791	5.264213915731725	4.829947515020283	5.4249649404383256	4.974754438237305	5.752237627266627	4.921675965395061	4.859424203182949	6.019902531093402	5.7450528533000575	5.060433828511082	5.893230022145067	4.77583437231395	5.6245053752450636	5.62327080536243	5.628715287011546	5.621039103701577
pos_2985	4,6-Dihydroxy-2-Quinolinecarboxylic Acid	metab_2984	3.48903	-	206.045	3.927911444496992	3.978730499061908	4.222851123059857	4.041614636283327	4.136968514417497	4.6421399751917525	4.198732374972948	3.6436373294096547	2.4241405148266213	3.9780711224830068	2.601173354701376	3.2964873638740118	3.2454129105866736	3.7717284426410433	4.5469892345555225	3.897097600643552	3.572657946133911	2.616542507575714	2.5971353313079786	3.7338798952157184	3.1856531705947595	3.9393093889008064	3.240455651580544	4.652796311403578	3.5508998817698343	2.33507472701752	4.397178350666271	4.04952777660865	2.6647168200185973	4.341839116565137	4.0437748409419045	3.2358511779006767	3.919223139087061	4.007245287117621	3.629843626559005	2.4489068702265584	4.024703824751262	3.9852578185263945	4.016991847686486	4.040737827010155
pos_2997	Val-Gly	metab_2996	3.49432	-	157.097	4.192157518127773	4.560906494845835	2.2866289815679703	3.6020170234125284	4.610144735475492	4.375574052953946	4.467319397772775	4.106750358189605	4.635005538300552	4.759469341422932	4.658024272742615	4.679932037017337	4.685476317446024	4.766912358891554	4.321844680782989	3.865215043164589	4.746746608214379	4.563911478944422	4.559060129534436	4.6685244419439575	4.4049820979037175	4.401909085941365	4.527728002613708	3.8796998188942338	4.814215552482929	3.4845404221922216	4.550046362951874	4.097608002009049	4.452244792126288	3.87800514418413	3.9884373328263263	4.924254031262787	4.845895144079685	4.30253307566449	4.690747110968036	2.1672011332435734	4.536042248643448	4.539963949204156	4.502780193623168	4.514798499066164
pos_2998	Beta-Asarone	metab_2997	3.49432	-	250.143	3.2053462049512627	4.12934008446509	3.6074092601137817	3.068859039914539	3.2611459558550147	3.503367246952452	4.240112370641139	4.450644916502259	2.26801168144802	2.4663464641333284	3.730726364842906	3.4598760916361715	2.2787413776159973	3.062629655523386	4.3830363630712	3.774832335361512	3.375918991067012	3.3404867841070844	4.895851795031637	4.4500445289597055	3.038133827158292	2.7038591687850007	4.52882225449487	3.8031660303773336	3.177302867461423	2.179107523362146	2.910388861092384	3.3474905628576783	2.4706476912731263	3.5858522639144264	3.5531692810535835	5.375018147847445	2.6734819673206043	3.6487237990271812	4.471309095678954	5.36370502162715	4.307620214771287	4.342724505946172	4.375928831200055	4.350057955736522
pos_3000	Gly Val Val	metab_2999	3.49432	-	274.176	4.743469873449358	5.1592199829437115	4.245532434705834	3.9531962893037824	5.302495828887063	4.997810516090493	5.029354108575209	4.761258260429562	5.174646547622896	5.358820234721142	5.26592901413049	5.241911620479182	5.206843332863412	5.360873411394817	4.9112861515257595	4.52079847774707	5.330552129392251	5.170114235575954	5.2723891163645495	5.269799322397889	4.986468356392747	4.986756801107603	5.126832135341858	4.727334701613817	5.383436589735854	4.126235667829747	5.151678936613019	4.6861198330246525	5.1062595079303374	4.522870961461332	4.591214552898865	5.541592235502128	5.413929325130201	4.954545525221172	5.313545412458937	4.037173073625919	5.125903054247519	5.104976720806854	5.133812562798038	5.121349166322705
pos_3009	Dulcin	metab_3008	3.4996333333300003	-	181.09691994099998	3.9185471331848616	3.415697184219547	3.2165580261212567	2.3475920099610295	4.637428191339237	3.2112039875552565	3.1657374313647657	2.679251481469956	2.9013084842387875	4.124112388217823	3.1785925590161623	2.4441241593115253	2.429530100820556	3.4900894610775457	3.647753099739464	2.480066600991382	3.1596866769070364	4.167584528998362	3.1953366737950404	3.7861641935672687	2.409965815195114	2.9580165128327884	3.6194367857141336	4.145968990899243	3.893716454823835	3.927585982755373	2.500879243016632	2.3288824907590686	2.5828387469514342	2.6225822551541955	3.5679802387550934	3.247959962084685	3.3734980283274756	3.0751383302622006	3.502859787211544	2.338600954459761	3.462606658097936	3.361151709074505	3.6218143878224502	3.6222289610652787
pos_3034	Ser-Gly-Leu	metab_3033	3.50493	-	276.155	4.163101095034473	4.147361893347345	3.0519108023350427	3.685359878623984	4.620709522881096	4.1515734758762095	4.800666675906947	3.4097521044737844	4.916782323170769	4.836545880582387	4.824243124156234	4.5327016578743935	4.6311168521119805	4.096976621618445	4.2880012729726245	4.085923926122224	4.80787903837168	4.726936542854975	4.896797795603819	4.726431095444671	4.20542878926031	4.529096083409871	4.636929816129995	4.2634264758051446	4.558059491197997	4.202036527813484	3.6670938564733087	3.4646350845621545	4.961667949548131	4.004905424099442	3.670106360891952	4.977221911825987	4.870890985857939	4.2730096409540215	4.8044949755710915	4.064574362703024	4.59205098324276	4.520366846167084	4.50186944492177	4.535052639868815
pos_3036	Val Ile Ala	metab_3035	3.50493	-	302.207	5.06791345481305	4.976299070005362	4.7048467350441046	4.236784165961401	5.231001781176682	5.291838598079978	6.2156159060523954	5.097118172020725	5.402312117302643	5.678743384545691	5.572272935976055	4.966140752694527	5.406937629675452	5.3566063671676645	4.766702206592502	4.73880764142694	5.673365549167273	5.353253465679815	5.699876937186836	5.915483819142194	5.3379012718788825	5.639757201821811	5.719086417262955	4.9472212189350095	5.089801856510677	4.44323304882576	5.112573341851632	4.811024448063534	5.609276587157677	4.8959875313828745	4.6571232489754015	5.795832128010763	5.434597221057863	5.074583104398293	5.709135268868346	4.668806783803984	5.430290242975119	5.432054790977633	5.44847377062078	5.446065136587371
pos_3039	Leu Asp Thr	metab_3038	3.50493	-	348.176	4.313851573770445	4.764482313701797	4.218022282037784	3.8773190084996862	5.286696270227427	4.488386861098499	4.9888085396075725	4.7151121794456365	5.015383732190147	5.060208559096878	5.331429970498667	5.143234482590632	4.934801420197728	4.916385829241607	4.816536139647924	4.182650528367851	4.981856143273278	5.213266721770308	5.073388963585372	5.540449460702078	4.539095743385015	5.0553472398478005	4.824320002355184	4.58697941892652	4.816274825115196	4.736338372040144	4.6100751093128185	4.634932661835781	5.813562400229093	4.738625691119834	4.010568761011422	4.9209470474819605	4.821336719129625	4.900586288819022	4.870581602521237	4.342686543114732	4.994917172571327	4.9540376826582335	5.00449349953512	4.983451240945996
pos_3041	Androsterone Sulfate	metab_3040	3.50493	-	371.192	4.130277720687728	4.865263857231424	3.0339019448533806	4.371551014139559	4.833700776271273	4.548432567476912	3.907349828669688	5.090902541599947	2.1118371061563863	4.27617998090959	3.9343355079308964	3.9133527426725454	4.416374826018265	4.649944890205603	4.2930863795325465	4.7919125204717234	4.661186845369424	4.31198897451747	4.0490144001028	4.4494869943598045	3.4196210223470813	4.373028089297342	4.389117579715838	4.553776603299721	4.4217794567559086	4.019963482786453	4.307932302195503	4.230785437081545	3.8225901771185056	4.704432714850729	4.5222027601809325	4.8280971344517605	4.966413246299294	6.412491176879206	3.785978465053404	4.447013046092763	4.684778069572296	4.684132279395807	4.668102105734628	4.785249814723582
pos_3057	N-(3-Amino-2-Hydroxy-3-Oxopropyl)-L-Valine	metab_3056	3.51028	-	187.10743029900001	4.2891895318703535	4.449209517588869	3.536503127045568	3.437054462660311	4.7692767836730345	4.447664119988287	4.521682305313362	5.592541114777156	4.920332272045223	4.942436668498078	4.9048125857767495	4.522759202117036	4.637470305266944	4.394812680838759	4.311640798678727	3.760145322450417	4.748022283681946	4.727699081674789	4.950117394185472	4.8891719855715285	4.313126835613077	4.594592197191936	4.628174590459137	4.327970202330533	4.689142694475937	4.457009215953536	4.215855025318943	3.85738792807346	4.937395736761002	4.357994403681247	4.07904153822059	5.124765344816508	4.738941407507329	4.180287461605955	4.824332493712125	4.005231822129562	4.747479833665883	4.745728520715753	4.763336889867034	4.742100365265366
pos_3087	Ser Val Val	metab_3086	3.51558	-	304.186	4.859926322110007	4.894986973672215	4.264529216445826	2.1564801320337272	5.317428774661209	5.037667668284112	4.928060146506624	4.840813135254495	5.523686934206066	5.49651710670183	5.5190158777419605	5.134037221130202	5.203993920735744	4.995451131451956	4.860842447807436	4.2701528728523	5.320415891962219	5.178561057947227	5.427787185608271	5.429780171021463	4.865816342379649	5.094050703300394	5.172087009340474	4.757291177698725	5.308511471741878	5.004092729756182	4.8753387266940855	4.350521962992017	5.441896219588922	4.741266207772555	4.416892120518615	5.75784788345801	5.2789023594419815	4.524719211637999	5.441567441836737	4.701265516011682	5.142191416279868	5.144608598487939	5.17982767755379	5.177315594124298
pos_3088	Thr-Ser-Leu	metab_3087	3.51558	-	320.18130814299997	4.372324462672284	4.581205721942912	3.534898011916386	3.183780184299466	5.200278874989534	4.7983980038924985	5.202497440735432	3.9940886029733615	4.886716849223518	4.77826535381513	5.011475036837803	4.607174793103294	4.992318003459479	4.6010394545278945	4.5788826627534025	3.4369784631766165	5.136060340910484	4.9000709075688205	5.2935972149556365	5.084531550977473	4.76171945841031	4.817347057033532	4.920741547860187	4.868115050258324	4.6637864953341435	4.927956044643102	4.770708174743387	4.22447965785245	5.382479691191498	4.160907139773137	4.050291775015653	5.054535784712801	4.750485994555231	4.9269836166721435	5.224789122164424	4.450366300039155	4.8472364081339085	4.842597060512813	4.877657786869519	4.905762160776841
pos_3105	Enallylpropymal	metab_3104	3.52092	-	225.123	4.170547522988217	4.231402783841964	4.520081736544993	4.1371925472052125	3.9877457725911367	4.615767308872417	4.335675856170504	3.64437772547714	2.73610127086701	3.1611654313149686	4.250979596979676	3.6066065799518454	3.2382429919965623	4.363349874675019	3.2389227736268182	4.604866978126472	4.113909809974462	3.8933015581715145	3.6336810734492535	3.8342679177494094	3.725435449514072	3.2241014481443546	3.5881604199109454	4.490551804459889	3.9550246060812766	3.350359285602573	4.483972532717473	4.235130171996916	4.121937701241925	4.826216286636469	4.093928652219585	3.0828643196254832	3.958652905710248	4.654215875919002	3.4600830548292936	4.4774659278998366	4.170068802604288	4.134517642694709	4.2328457009929785	4.197246734353835
pos_3106	N-(6-Methoxyquinolin-8-Yl)Alanine	metab_3105	3.52092	-	247.107	3.947036380090023	4.549649992157911	3.647064396940391	4.127521186794299	3.7210407059416837	4.375472587981244	3.862207933801344	4.3849330048579365	3.1146750864831665	3.886107179184784	3.9099429059274255	3.798478305581277	4.103880799036332	4.174198985983578	3.6478766532559024	4.3761504786419465	4.070967940012793	3.2021013927670587	3.182658600319297	3.764634316789441	3.583304578354209	3.081531915367348	4.145613229659571	4.208879632457236	3.8650268423621537	3.2428097675129126	4.186819982233116	4.124833728395242	3.373490713776341	4.786750920692243	4.2483703574802725	4.219521619587947	4.753648528949976	4.676438480236091	3.0957553850412194	4.373087759227491	4.07025660755778	4.1860434657478836	4.1716537728866605	4.122436544661388
pos_3123	N(6)-(1-Carboxyethyl)-L-Lysine	metab_3122	3.52625	-	183.11251613299999	4.103939005379302	3.450798743927203	3.516218186425879	2.672148214838862	3.952533960371418	3.197476613714512	2.9640634666266634	4.19348207452741	2.8845589054707297	3.8952447893333413	3.5754914058773086	3.8783133493735935	3.754982820516637	3.7280207148794418	4.388461057530709	2.802442578019675	4.071214097267881	4.061315552184697	3.0029537319432302	3.1422404485403566	4.200881273527885	4.193498997209502	3.715398680497572	3.9941994811203347	4.026077142424681	3.8049736123865134	3.0771679970392216	4.554383125832347	3.1370179590419847	3.924907729760441	3.430339146497549	4.0139396543695165	4.407994303060578	3.6753637300843565	3.67108466197838	3.2046219717015254	3.906112796475997	3.845443891981446	3.9287890187568015	3.834078892052897
pos_3128	Thr Val Val	metab_3127	3.52625	-	318.202	3.8956058527037283	4.563560012562969	3.640430840359664	3.356453546842209	4.845602492241713	4.1976912898124015	4.896991079998424	3.992349667046485	5.117379406509384	4.938635721547966	4.805948349596156	4.736523707195915	4.682042868679892	4.556268811717618	4.4391454669794586	3.4869382073296116	5.005633904015826	4.907408147676604	5.022182705030316	4.597578970558208	4.123377189550854	4.748646660082153	4.678573294342068	4.7073216481010975	4.84401658105662	4.36478973987381	4.290959433684172	4.029481709937719	5.022792937845378	3.7107328889436513	4.119627229343308	4.812509503119872	4.5855364772712806	4.6008035900769935	5.088196582899745	3.3474255160502304	4.685547727296167	4.6491335734950745	4.6957683128196415	4.621302906669476
pos_3129	Pro Glu Leu	metab_3128	3.52625	-	358.198	4.027802184687853	4.8644098110134735	4.137412193462712	3.788538617608287	5.2958666701279	4.5828056616606725	5.105461618283392	4.87334620571808	4.448440150939987	4.359734216436218	4.710862073060589	3.7802662267248746	4.690772602081738	4.480511747023467	3.9694970452988017	3.950938159865103	4.454614849745807	3.8473253707215465	4.3104330915979805	5.136313714965424	4.36229295131866	4.497341566397521	4.589186481729912	3.6319300050648433	4.377250978924118	4.2578127681635225	4.239638011186701	4.501643955599344	4.6115853311377455	4.110392253454095	3.986025576927736	4.615868253512441	4.601961131917497	4.028501411444396	4.555460629196314	3.953451453304986	4.464214918000317	4.440169713764101	4.540844178859033	4.594931424469988
pos_3130	Thr Phe Thr	metab_3129	3.52625	-	368.18	3.4713031581033125	4.099038792734706	2.7609259996037756	2.8785643719015948	4.237818226832317	4.390203336394388	4.222063418104517	2.79617440547217	4.526027343086528	4.540297934715726	4.722340840946378	4.134606067172691	4.114987266960807	4.178061532033998	3.6863092856638	2.9504060223965856	4.441382996246882	4.470407152771067	4.629179431733669	4.456699652005981	3.8060010687565455	4.265869128758217	4.155073184186865	3.9460531289876863	4.24580596661435	3.843235006550408	3.8740642546649413	3.3083670385153905	4.454231817150638	3.446186526837605	3.536558623316397	4.22542660624077	4.302884605381626	3.3941425319884444	4.47245360120407	2.9065101899041483	4.2845293934921465	4.112175400277931	4.123041261803332	4.177207709620132
pos_3138	Phenylglyoxylic Acid	metab_3137	3.53163	代谢途径;氨基苯甲酸盐降解;苯丙氨酸代谢;不同环境中的微生物代谢	192.065	5.0202373322264275	5.146900243654295	4.754919605982769	4.838844617217139	3.9669719902455776	5.245184314148423	4.115211581224035	4.8144853904185165	4.5522197675482525	4.815610991862794	4.711443594109877	4.630568051746334	4.294328302481596	5.14568248407273	5.1510067304872855	4.954187797125137	4.917208709095204	4.229560293138113	4.108179223494174	4.634639312762566	4.475363980041291	3.8597003984500695	4.388931739467998	4.860666478493281	4.816561555088574	3.56601707008017	4.864709192498969	4.881687246558197	4.760199611969858	5.069648314048896	4.876844286795926	4.5338318867184615	4.6911212754660285	5.289513556936279	4.313151254845007	4.552577004676953	4.8066676328508215	4.800849284590142	4.826963599002852	4.795913802584028
pos_3139	Ritalinic Acid	metab_3138	3.53163	-	237.159	4.6338552669773785	4.120284584079826	5.5319828312086665	3.1913305433079557	4.8265705633557925	3.6531474525578256	3.102439849690718	3.942909171455694	2.47774776623457	2.986214024371717	3.083874912001656	4.2323582480467055	2.6213020007992123	4.014826382457752	5.549398486010748	4.166126883146962	4.0587360676292805	4.446327311482257	2.685119394262784	3.2426472005989213	2.468312000602192	2.5498582855974203	4.403317089364985	4.7569101572470345	2.8748886592574765	2.3886385838308444	4.450793547177256	4.6379452367086325	2.6807200811723835	4.185907526580587	4.899711442558285	4.358950920103029	4.41247836126762	4.637872750631744	2.56405387850364	4.423393667025207	4.606824266658495	4.576057623419255	4.627589479572272	4.651683380339348
pos_3142	N-Methyl-1-Methylsulfonyl-4-Oxo-1,5-Diazacycloundecane-8-Carboxamide	metab_3141	3.53163	-	306.146	3.8335521636186236	4.282852227517285	3.0509590222325023	3.5676397155982214	4.430754289100153	4.200594002793928	4.977011562700381	3.0862360788006264	4.560144686873657	4.764832378159074	4.777820426911783	4.322800056113288	4.527074555808509	4.690439328096958	3.8788047858876977	3.35309946236579	4.775992588488384	4.360513905341674	5.07819446735875	4.518668218984705	4.611910741962785	4.458160032497691	4.854109302162695	3.7035231481881694	4.413895981828462	3.1134382538064083	4.287070645452928	3.51176550531542	4.61768840635433	3.1172032130119485	3.4507195358685765	4.693855859380332	5.051792486396323	3.438039635728556	4.789861226784006	3.0559344807039577	4.496295916181315	4.442985456066923	4.489521806285503	4.414018722897123
pos_3153	Glu Val Val	metab_3152	3.53697	-	346.19689348699995	4.105100126001285	4.555282454693577	4.384538642250074	3.3493438085264438	5.124445556982621	4.980674753882026	4.918630893975823	4.309798682133885	5.262846420114268	5.410996768384585	5.4124809108673215	5.211894382911463	4.816524082879215	4.63294368416179	4.7331565119040935	4.036434644372236	5.371191979743544	5.563837847418671	5.411027621688444	4.503562992698887	4.5413536812986415	5.327005853538451	4.768240239900999	4.828664576909411	5.285332700024472	4.61048668670261	4.537694459900087	4.318024916535172	5.335127407743314	4.43204827092748	4.806852555828998	4.743321460979424	4.832302912508882	4.375121069424457	5.349647118420989	4.3121678916200965	5.041858677177699	4.9836375974114535	5.048113391914097	4.987524201205816
pos_3154	Tryptophan 2-C-Mannoside	metab_3153	3.53697	-	367.149	4.398736820001959	4.603950176088872	3.9279267842977887	4.350153116837951	4.661267389277357	4.8693921628505255	3.913020300816501	4.2052283368935885	4.686523246662035	4.638156370766857	5.893408888876072	5.5568049661615575	3.924448219225476	4.433301124863613	4.306383711960122	4.529589996524973	4.607909212764057	5.504462617329176	4.8867837287926905	4.866953395793122	3.5210202427294157	4.576836079693416	3.8531368536605917	4.5221189256584715	4.290840770685575	4.413753877497796	4.109372418685615	4.245879225722237	5.092717079085998	4.776764932311844	4.376807688163821	4.365398868618213	4.352988000389569	4.725292766953293	3.628845623381809	4.4216196246208845	4.852960172177852	4.821285696406425	4.852040826109202	4.8811285315428
pos_3172	Gln Phe	metab_3171	3.5476166666699998	-	294.14446059200003	4.288788661199557	4.497951948297781	3.9818894466791774	3.7883082516210007	4.761551071902487	4.7332973311027375	5.083791067532504	4.337273779611151	3.9924890671871753	5.000512291840766	4.970249320767016	4.543980817985072	4.5679635294048015	4.552289177138062	4.228869237043479	3.8038268917879874	4.880588476496773	4.3731261366266265	5.2475158194487	4.926236601791465	4.564372310677121	5.045484881459274	4.91430488378605	4.50340500902369	4.503416229338434	4.146044287372417	4.5835989671793005	4.087396697280848	5.0870007343879315	4.339599564077592	4.132457310871931	5.100685529521941	4.719709211752343	4.576010875269613	4.713695372876232	4.27246236201349	4.714827301305139	4.608451551040613	4.643443239060943	4.68598213587039
pos_3173	Val-Val-Pro	metab_3172	3.5476166666699998	-	314.206	4.768708920736632	4.629418980680602	4.794634680757465	4.379119631126941	4.541471899341198	5.305039948275995	5.540504656662649	5.226353557527787	4.849226549837561	5.121393293768749	4.877243375752463	4.389771150760578	5.0813173733370975	5.4805713592713365	3.4160265879104035	4.7093793102223565	5.062091072427295	4.817429671596376	5.148406853694465	5.548471560906048	5.050661709081406	5.015879058583635	5.302715734659532	4.2795320631161164	4.582436081397343	3.175167337917465	5.0538273486784036	4.27302407814367	4.961923286420529	4.499753777732477	4.569393249308408	5.284331484944498	5.310375539378737	4.492770410924252	4.9792069367685965	4.2164854295945	5.027456568579924	5.01197694334011	5.058844806721933	4.99453906422175
pos_3198	Paraxanthine	metab_3197	3.56357	代谢途径;植物次生代谢产物的生物合成;次级代谢产物的生物合成;不同环境中的微生物代谢;咖啡因代谢	181.072	5.344202632107028	3.087631459375978	5.385924620570759	2.4689023958924072	4.110991423733991	2.6447132907698254	5.527652679765413	5.000116018806915	0.505843275726936	4.634710745395416	1.7119866781724042	4.957921536061686	1.2234320221058186	2.967505825454561	2.260305083462344	4.299942128250834	3.247600843190208	2.8221792640947574	4.750080069016047	0.6113501620432957	1.1591772184944018	1.2294464344648506	0.8625483575070121	2.6672720126432456	1.1642420755661191	5.197014146826468	5.332553219421149	1.7437326964090791	4.552779382510899	4.616882288107481	4.3989286365595035	2.9405590779770447	4.992891382406186	4.3916708409414165	1.6356149361593708	4.531145351789847	4.637652535354019	4.661829775074802	4.641901332547391	4.640845501467459
pos_3199	Higenamine	metab_3198	3.56357	-	272.128	3.663355304283293	3.664395129445386	3.9719425191782007	4.471789198716406	2.9186040525048798	4.273666901289862	6.380484852570892	3.9996527164614872	2.7795063575736982	4.282088711397192	3.7444035095949615	2.845914004808695	4.607695108429119	4.4459435365429885	3.1871971720395464	4.31241524714356	3.86246468961593	2.9992485867303675	5.253542987126131	4.413877983249062	3.9399416322120087	3.3927708611198915	3.715937730567717	3.9996182998002285	3.6662112833880163	2.6902317053036167	2.9670119869659017	5.630814390640691	3.7783565387717823	5.0278855234077495	4.52076561349703	2.9919747031516004	4.541867415400619	4.9721660638838365	3.689718036105545	4.7087464763653095	4.913845089674349	4.961943178594408	4.972668068151411	4.940351658914398
pos_3200	Gly Glu Leu	metab_3199	3.56357	-	318.166	4.958450497306238	5.6220198468767775	5.043866636011597	5.198634037639438	5.761361965426179	5.150037993186111	5.5942355986303935	5.436789999363618	5.324444802272841	5.446960228383514	5.648315736063838	5.1042325346757815	5.4310680789225065	5.482767630977431	5.0451365472739145	5.13332292663012	5.331968109174636	5.323431595214268	5.587131164140182	5.688536943686057	5.143414251690249	5.324966061091714	5.28724317273917	4.949909051237207	5.372932145867841	4.5850073358323495	5.2275305247128045	4.655639672380729	5.625148066029012	4.893521491888019	4.1680316283135035	5.6885257425186975	5.63539170335946	5.0485128941798205	5.353805414867283	4.625874373971733	5.367949437139137	5.392885225420153	5.3781476098717285	5.392935576426266
pos_3229	Lys-Ile-Tyr	metab_3228	3.58483	-	423.25965166199995	3.386343888939706	4.5497359113730065	3.5087950461194883	3.3977237113255647	5.037211793849916	4.127504442801552	5.303362755353182	4.0794093177246245	3.363848424752828	4.634477290677588	4.580292599836652	3.4303318609806386	3.8398597911808126	4.820080775087576	4.030123982938202	3.5282128702847277	4.71311053429874	3.5567701603140103	5.286135991771927	4.821789890239566	4.053118646875377	4.767197450401583	4.927554645403037	4.430435436499495	4.411234339585072	3.687933950787819	4.099882272477228	3.44931705421685	5.151695549902324	3.760437478353335	4.066218862771212	4.764602466200513	4.5369485034610015	4.271854241958196	4.757892734026676	4.71573166360171	4.451197770895952	4.576198100178642	4.454799961954143	4.613774587678486
pos_3231	1,5-Naphthalenediamine	metab_3230	3.59018	-	159.091	4.320308880835768	4.459005677176772	3.8208670614168967	3.593169194891251	4.789273405323666	4.326543432962958	4.302466902764287	4.210865804598732	5.178173696010171	4.3016928600978535	4.961603907316372	4.915140217142244	4.555315185712692	4.5343798223842215	5.18507176363526	3.9587763364253212	4.390728434847951	4.833360835900157	4.296760889658884	4.520108133182085	4.353308744740195	3.869033167447936	4.307844924029824	4.589821948110724	4.580850696328561	4.80626984023302	4.152810337054512	4.383506131528128	4.230652984756132	4.219958877782203	4.400651970200076	4.838757783127001	4.672039085121324	4.3213534260201625	4.5097351441107865	4.534138099076206	4.557856033836154	4.547520402263926	4.568510476434608	4.578778789824627
pos_3232	D-(+)-Tryptophan	metab_3231	3.59018	-	205.09685418700002	6.4273114332967305	6.676372473762138	6.469826887532762	5.76575456910765	6.892500502326891	6.470846400163814	6.484292324121548	6.331241745135678	7.218351632918253	6.48906960320767	7.020669618930572	7.062205614269378	6.680181385946343	6.702466072170383	7.273474970982716	6.0559791421307025	6.509918248346751	6.9523396988941215	6.420932485201912	6.6272690413204405	6.5126398208464815	6.097906750354454	6.487311234817303	6.756840952248213	6.7051333046657335	6.939866053121557	6.296737590488349	6.47449037481565	6.3861801918736525	6.231343623926009	6.5198635111985626	6.947831009001838	6.829969693301116	6.508057589136121	6.679819297583129	6.690872166874317	6.711058836278513	6.714251697495378	6.7151584976977645	6.730642368190073
pos_3241	4-Indolecarbaldehyde	metab_3240	3.5958	-	146.06	5.452933785097174	5.706159702069218	5.451975203015274	4.734283458072377	5.949392666917047	5.490094584325672	5.522759292882547	5.3924243793142	6.25568593058054	5.521377325137007	6.058210839672482	6.095790120355664	5.722099552782253	5.753993203296756	6.308276304737537	5.052380835071847	5.534476232755949	5.986746348632831	5.447206618890189	5.69565108422451	5.568842881997924	5.065497130241163	5.497685355744139	5.809835716683443	5.745898746890452	5.975784973422147	5.337494215294377	5.500943970791293	5.417706498462279	5.252552135487528	5.572670510540244	5.993291357006763	5.870780573974072	5.545475242673506	5.709221751114584	5.7431320355842725	5.746900413576577	5.747766415230876	5.764591340579004	5.7584195066337625
pos_3243	N'-(2-Cyano-3-Fluoro-N-Methylanilino)Ethanimidamide	metab_3242	3.5958	-	207.103	3.8970969462859286	4.27827572796026	2.541434857579339	2.4306880997886458	4.4749210534639685	3.6938332970578185	3.9285036583628963	3.7055424011493066	4.804593681137418	3.9084724397956037	4.649233517437486	4.635391500108144	4.078883497288108	4.1755658411439525	4.887117194016874	3.2359363567502584	3.986117936631257	4.555499954335682	3.9057942793153084	4.158749621652992	3.9801341536130415	2.769770232359311	3.8007397340342814	4.291318820155197	4.172990034438897	4.51842775505865	3.702908097284148	3.936152648997109	3.736154876401745	4.490514614614696	4.0620256203204725	4.455222239548942	4.332178534900914	3.9434442924817743	4.1614178352281055	4.170170023001308	4.195693151666191	4.218936050120058	4.286375996995842	4.220693319662024
pos_3244	Lysine Phosphoester	metab_3243	3.5958	-	227.079	5.794691587655418	6.054455536327227	5.499411545524403	5.013661833674004	6.255580844110379	5.7250431853602635	5.839850974702812	5.690796732675457	6.586894876747795	5.8298133563512575	6.305847558163004	6.371656679494119	6.074339247393636	6.029735665107813	6.659090430675208	5.3453503071582045	5.798974146892051	6.250700637743173	5.691043332661677	5.948691349548483	5.901732546801268	5.468912593666252	5.8502579230068985	6.130447028921537	6.07102935793713	6.351290937028503	5.57186869263675	5.826552179786559	5.67675239415018	5.5451076309368705	5.813485293841041	6.299829897897832	6.182174824849301	5.749758570055307	6.03585495314884	6.0294590760878375	6.0404317048474825	6.0417077585428105	6.059418865988609	6.0521124691531165
pos_3246	Trp-Ala	metab_3245	3.5958	-	276.134	3.0903220424925943	4.3400987922911884	3.212730349142473	3.1016973544261632	4.711087292026146	4.190959552363488	4.2308789280933405	3.2480167842525223	3.2143642140701725	4.21646526907897	3.3764836533395237	3.5486389446635416	4.814365891479715	4.295565768525746	3.342713002180996	3.490789565190465	4.245388704562898	3.5647057970134286	4.563444734117889	4.249830754020234	3.4783221631116668	4.342035259158556	4.110403571104949	4.37822585801699	4.075214169121382	4.463661239407701	4.147600394749544	3.08291676377419	4.303354411646931	4.185833523502759	3.673155768728384	4.704783064148692	4.205681233677165	4.319023594271807	4.332314131454045	4.1929423725743	4.278484833721072	4.153195910217513	4.2899831229075165	4.360275274067786
pos_3247	Asn Pro Leu	metab_3246	3.5958	-	343.197	3.5774553583870183	3.0874189149963827	3.1060393626876803	3.369985261515785	3.853809622971608	3.3010209651620537	4.620737970394816	3.6761066908078894	2.961174227133534	4.604289482407009	4.542334191771428	3.027616905746206	3.620673581618626	3.669986596794012	3.0810775970890285	3.1254481927085984	4.406024948135264	3.230258634038493	4.7048342982610025	4.5364973333946335	3.5585001280201505	4.598405638224294	4.392628805931568	4.2008883470822544	3.4385068664298992	3.2868886437388687	4.109588744128363	3.4807358473917214	4.566733644174907	3.2146440583086897	3.5333038024683923	4.862554681785223	4.398346447959748	4.162645402063813	3.7920174071881614	3.1053056571635227	4.2501577222738405	4.261603915371401	4.335864496237728	4.082138430145038
pos_3259	Ile Ile Ser	metab_3258	3.6011666666699997	-	332.217	3.6826897804337073	3.095400820622788	3.5887413646548403	2.180028629751244	2.991692777389775	3.900235206611777	5.288672418669028	2.766246661660172	4.757007116642124	4.996960177183783	4.27942216806661	3.856427159040096	4.325251573415974	4.864513956178749	2.2656408459767383	4.727085199290288	4.981843101979798	4.738386778022145	4.323744966414789	4.9893743420208025	3.764095517880625	4.853289532042196	4.806456243841873	2.9458906456258016	4.297647927226501	3.9243061003945283	4.963811909279663	3.9755139724287054	4.886540672005345	3.301838335600788	3.2038188820975417	4.798595071246933	3.9188849237379904	3.966753209135352	4.901593668326542	3.3774987635814755	4.238476129313339	4.348145413667091	4.397336470848942	4.122953050532601
pos_3268	L-Hypoglycin A	metab_3267	3.6065	-	183.113	3.9226806512572296	2.8992724930476097	4.306443751336237	2.403525625571397	2.49347235171416	2.7758771156709243	2.5009000601932407	5.092192889678642	2.369775396410448	4.178140237357956	4.74672189856198	4.207779391641767	3.1906115588984534	2.4962245470713635	5.132414079019137	2.5336144678822508	4.228026096416545	4.637425998899665	3.3332132746562992	4.553821852797623	3.867184784122277	4.381744312569296	3.4953192493230087	3.3508201747651536	4.199072203325321	4.08857422870664	2.5568832734566134	4.339009644647032	2.5725948473954414	2.9703387400944896	2.5161419101701874	4.712103197963852	4.319304610439581	3.0817027714683545	2.5390391596622583	2.966475735851461	4.0990608501199	4.134174145551054	4.092047724153587	4.095807511156498
pos_3269	Threonylhydroxyproline	metab_3268	3.6065	-	215.102	3.908878441879873	3.801441673760678	2.800636287310489	2.6897260525029125	4.133419763759312	3.743392304807908	3.654888011084232	3.210824113088404	4.847788109052545	4.720402410708114	4.8588913170321035	4.739928416868028	4.378579103578378	3.7960889936720132	3.0866104801674727	2.82002993486894	4.065136453186314	4.317631622300972	4.754570963958624	4.677258484394233	3.734408422234788	4.639149110694087	4.5781850834479965	3.6560145278600418	4.2831587629804035	3.771951602140072	3.730430828002142	3.612422648071892	4.7791551494370985	3.4299346485046804	3.9460172484337344	4.2504435212295295	2.779712741792273	3.611498912641837	3.5056876031824418	3.514010269611373	4.1465928831797925	4.288865936062996	4.281118023072269	4.288736262044808
pos_3272	1-(5-Chloro-2-Methoxyphenyl)-3-[2-(1-Methylpyrrolo[2,3-B]Pyridin-3-Yl)Ethyl]Urea	metab_3271	3.6065	-	359.13	4.824072370456653	4.602523248040226	7.535750169341319	5.867336385952037	3.73967736147262	4.457642974343663	2.5466111004044016	3.9534252158937626	3.2089083792555644	5.3248419740033	4.212719622070479	5.761438492437253	5.622467878006764	3.713967305734813	2.5556556068359155	4.493018090329019	3.81089864707389	3.5530363419094564	3.5719543700646037	3.4252611979883336	2.7346622356520447	2.487514307630229	2.5748746507370224	3.7203557676881696	3.8985886910951013	3.894867646970855	4.278581201948338	4.871556641113399	4.503989976057087	4.357431495288209	3.8164836567069225	2.7490871854008403	4.164624984403065	4.500863143958952	3.410578783944357	3.4020301354304063	5.268777049139229	5.19291001057558	5.213223250964078	5.176072241034464
pos_3280	Asp Val Val	metab_3279	3.61185	-	332.181	4.633825805917524	4.729871437653294	3.6565324046781815	3.5454497564306098	5.277469674376269	4.50946	4.411467627130933	3.995645717162647	5.5463139706214655	5.46289570551645	5.627835592034437	5.448943192851188	5.216645864066706	4.549986043190959	4.680616005757939	3.675951926289154	4.756950548689116	5.236097594680722	5.4855349269828695	5.397123247430419	4.597270227279368	5.378427519219172	5.245495664242293	4.595864884780804	5.126550437399644	4.552718090079933	4.223133799177818	4.2918474539637215	5.534209749400481	4.295694585572401	4.597602646694421	5.064015850830797	4.505825611109199	4.285353629935006	4.546687584296513	4.364093423569658	4.9604671686979005	4.998167747788171	4.964982294424309	5.048025768935887
pos_3281	P-Coumaroyl 3-Hydroxytyrosine	metab_3280	3.61185	-	344.116	4.259746420570569	3.0600568580271963	0.024552820201657444	3.471780191218324	0.02343282588752092	3.9281738445101366	3.7243255978676544	0.02656991450439403	0.017723271686862996	3.61061106317208	3.0833823958480053	0.02058785926798579	0.01815981009346713	4.26320753079499	0.02321634439294856	3.8079040532204576	4.315651623480769	0.02733296016538441	4.700269266416953	4.593934931651115	3.3085954891402336	2.831479280930795	3.044825166951738	3.828699387959413	3.3037788286926166	0.014478929655493756	2.6194904845735016	3.3124021267499586	4.0649033772385605	6.782563999594313	4.0216089097850105	3.4621032011538184	3.705624020808792	3.7260083451563375	2.323332053422152	3.77645245706184	4.972911357337291	4.9914607900562284	5.082307989537847	5.023717422750735
pos_3282	Jwh 122	metab_3281	3.61185	-	356.20393281599996	3.0067268442503354	2.6472398128052945	2.7147234092260892	3.9541680488425217	4.5128750570698415	5.333561746300148	4.6960303469731395	4.827319112261541	2.570055336539576	3.9248789951040592	3.3802888747251387	4.744451520290792	2.5808138423708944	6.606354564314848	4.4733676753376335	5.761490158603218	4.321753575122491	4.226230004909529	5.446023132105782	4.526864931067324	5.235382170362086	3.769395332707612	3.9739755644271217	5.439030370399476	2.649985920804917	2.4808829003054123	6.521787641179111	5.914027531277298	4.740462172754908	4.389184082017669	4.6094093364497715	5.033507577570968	3.4761024761901624	5.297418187823376	3.3691041071338286	4.4796908958856845	5.39356716502019	5.43131478739666	5.417063155760758	5.535309844272478
pos_3283	Gln-Glu-Ile	metab_3282	3.61185	-	389.202	3.5541372727015315	4.511353933952652	3.974803034960229	1.3192754735541274	4.862560290588348	4.435379221235356	5.259797652562991	4.323534661376657	5.142676834504957	5.0738947568450445	5.407032179040308	4.537587908866972	4.603055583001497	4.830837649196393	4.074838243216049	3.13668062266457	4.820443530884288	5.285533067824353	5.1961509016786165	4.978243960961262	4.420295503481006	4.9485099368212895	4.763361983851098	4.450983334106774	4.73216900997736	4.084133766674765	4.117646576727261	3.9677068238931317	5.461744754546926	3.3487093129826846	3.5133312328398048	4.686335472547517	4.8347577565655895	4.768345498364325	5.077017654742792	3.6103638564135903	4.814275171359862	4.778438778127053	4.8325387023920285	4.846618850424544
pos_3303	Thr-Val-Ala	metab_3302	3.6279	-	312.153	3.843210296501293	4.417089183905713	2.9749041364751068	2.863927695303311	4.583046669143457	4.221715027231337	4.051514809958541	3.8879912483947554	3.845805863622485	4.541715334034626	4.449859273038183	4.380473961387266	4.167675944443359	4.579355385362783	3.924066697239765	2.9943077210074085	4.606712301330967	4.515842502033982	4.35308132434853	4.928170227715851	3.826102551926512	4.114852355514457	4.1419300937694965	4.161377466130192	4.661608265863633	2.740793729763136	3.990094700893197	3.864960622789281	4.568705864190368	4.014149352550707	3.1072508464433004	4.949022159665165	4.438377639669058	4.074260796470507	4.400375990547059	3.4720811283623774	4.1617285374133814	4.24500412961552	4.353053361117892	4.3096317664930766
pos_3314	Thr-Phe	metab_3313	3.6332	-	267.133	4.183154286898672	4.73878233883694	3.8569209748386	3.606847601035833	5.1583928902276766	4.991194570893796	5.390003226575179	4.43576584183152	4.6121491981459695	5.4031430601895245	4.970658630350743	4.945412876916127	4.668667792201721	4.780959215336423	4.901458577621148	4.142526191282318	5.14696352728307	5.202927766513984	4.851193670388247	5.34439618582566	4.684813982032494	5.361349984372875	5.14565835981332	4.830175033698813	5.08194937560005	4.798656878877915	4.96257949957446	4.25826205757621	5.436781549216659	4.5987803139352375	4.419333232591353	5.382831897992856	4.696996942408158	4.908559498967786	4.857171031428716	4.528434127088347	4.9984264955324385	4.972277142640948	4.91078843455624	5.0299683610874935
pos_3320	Phe-Met-Leu	metab_3319	3.6332	-	432.19	0.8084244732488746	2.6142531662999016	0.9140027700169217	0.8180587341472059	4.764847760790528	0.9584174731800176	4.6202684236943465	0.945156603144242	3.2228454467012746	3.616790611002272	4.106334535595754	0.8458752002014629	3.3995253111550787	0.8981666631124443	0.8921441425782944	0.9311047378742421	3.684882095972656	3.167842435539641	4.56732302645537	0.9935806139494802	3.898202635893413	0.8508719322605691	0.9271586176989268	4.66356400757226	3.081352938243746	1.4687290384990908	4.546419096206527	4.604944480868988	4.08481038941391	4.625071063996041	4.5451834922365855	4.846634216450836	4.764041943694762	0.9274501148910312	3.105904337519033	4.187457740822741	3.903554548716404	4.0666689137882255	3.9598408416394846	4.009787494549483
pos_3337	Lupinine	metab_3336	3.64385	次级代谢产物的生物合成;莨菪烷、哌啶和吡啶生物碱的生物合成;鸟氨酸、赖氨酸和烟酸生物碱的生物合成	187.18	5.385106353834949	6.4097689962467586	5.326069104220765	4.147502875980954	5.4204132388195685	4.346939419591782	5.8096596287926445	5.74356962087572	2.844095111890194	3.0430638589750023	3.021468437607378	5.745279880627493	2.8548670355649524	5.332583788387735	5.796516581764856	6.9612426416686555	5.324511844990713	3.086503266409081	4.611887162501995	3.0783918150349217	5.162843709329869	2.9163320510177217	3.1937681359424137	5.6774990662601645	5.901411128177253	4.984489130232001	6.7141553973443875	6.291895994972199	3.0473758719140225	6.190532882954362	6.328069315970549	5.907435001009568	6.227172282129446	4.482367676566696	2.9305501480905973	3.864289105102334	5.942255122421937	5.9335942559550565	5.907155025542122	5.967788403117561
pos_3339	N-Lactoyl-Phenylalanine	metab_3338	3.64385	-	238.105	4.329568391686496	3.239085312897302	3.9758113797537775	4.683423714765596	4.977603179899738	6.3110456929006045	3.65333208041496	5.2869341821915485	2.906959187859016	4.0776519373339095	4.751362329919648	3.692633006809498	3.1054127242642746	5.6094757054111755	4.282239608710854	4.58417553363103	3.0969609396982523	4.361532984169947	6.16736564292974	5.242562034300066	4.6524177974367324	4.342741545452757	3.961638573259192	4.7933899305070895	3.23327634738731	2.8176425826116027	5.361528673146138	4.929972915939055	4.962660267646863	5.454865786365988	5.6235683776932985	3.7411824086434975	4.932557915081715	5.718919610326897	3.1031786822974925	5.902790283789345	5.358757914827802	5.346575407667554	5.375204217934739	5.38099974721444
pos_3354	N-Benzylformamide	metab_3353	3.65978	-	118.06503653899999	5.0380574448145055	5.1003867915444205	4.795804265671761	4.86570844445542	5.095412853507193	4.7971151941833545	4.9134217371395685	4.793136798972794	5.063098146672677	4.893798906980336	4.916976790416321	5.0219937623892905	5.041789001477689	4.948342581926324	5.1594493807710995	4.809462430936642	4.913461390076567	4.921425484294332	4.8585058951474736	4.92668527949545	4.972235498089381	4.9922243080024185	4.976943184211248	5.007092579560094	4.971272325989797	5.121093648440908	4.672897223601262	5.042271205200965	4.84609938629194	4.8650689535356735	4.7602062330070805	4.9826268203782895	5.0278447703928935	4.885048298989457	5.047604419081557	5.027770546581691	4.96158493914049	4.993951266813816	4.922859427421798	4.934710980284649
pos_3362	Queuine	metab_3361	3.67868	-	319.151	5.624026914308011	5.2846999838813415	5.0357792680687625	5.907798108989557	4.9713749806151215	6.238348270885266	5.506383201290107	5.424940662670078	3.279191334767776	5.578119781874375	4.665351142674582	4.347165534654367	4.485018376312394	5.803480683497582	4.155484411517244	2.56509305615251	5.276304860260637	5.644961523711897	3.4289746412651274	5.7162915427050365	3.0735548432128965	4.87258233353823	5.681104178365692	5.531242151283113	5.107718854037931	1.3684164892828428	6.037246893441206	5.615804497913243	4.66578009279291	6.021840329552166	5.873881675800088	5.71806972143215	5.632854688168838	5.968619416518724	5.68438033310166	5.703102481675072	5.6826226226325245	5.631756813270661	5.583116457981073	5.6234504691523215
pos_3379	Pyr-Phe-Oh	metab_3378	3.6935	-	277.118	3.295117051868273	4.825247980117392	3.8068393910638685	3.682308186917449	4.983105268974045	4.944112850563488	4.9043046338358245	3.957163439879119	4.832234435471533	5.608189125723817	5.4133028587844905	5.20291722954132	4.2576712370342085	4.961346019851499	5.018864898521352	3.5004581696846766	5.4355939390610715	5.470003911457914	5.145295997833232	4.60269955913232	4.791531896262655	5.439976781175221	4.70454804673492	4.972900684299099	5.105606290362343	4.516978702820609	4.409703462812233	4.5317329190031765	5.587843097780198	4.738390609127863	4.871935804189348	4.993360295011768	5.1941054500995225	4.78394017522237	5.242533082785993	3.840684543631729	5.164356913206825	5.158378402383844	5.141878333763189	5.180405230907184
pos_3380	Glu Phe	metab_3379	3.6935	-	295.128	3.7191900785032286	4.484459419920506	3.8416647109952	3.7305723720722974	4.609967199394796	4.480709420941507	4.664819511640052	3.876967041599225	4.335977992242303	5.362335030445301	5.148607395964072	4.7737019763711785	3.7074745720647377	4.521663643862693	4.55590700519493	3.861085686533378	5.176390532491432	5.2585926058007	4.929494501587301	4.120896563875953	4.147058645563522	5.1885632936789365	4.498576472352021	4.340208965459987	4.804286504040337	3.748773845045928	3.918147022936806	3.711780155442528	5.367148914016623	3.854106542914802	4.408754971232031	4.856479408585376	4.9454275605098985	4.419177920817009	4.9606601857513795	3.721542021932978	4.959597769536896	4.761901474837778	4.758095475731307	4.771563696204009
pos_3381	Urothion	metab_3380	3.6935	-	326.037	5.470356644699585	5.612859411044589	5.3713796643383	4.827493455267109	5.049531866752477	5.622971264171406	5.366293615761647	5.514645562756371	5.113781565940906	5.462249779115317	5.547558903518356	5.3414452560054055	5.3806666843420885	5.646876526540107	5.728306858369832	3.6749427399712773	5.5809829531909685	5.5979636642132915	5.392869251453302	5.46929374622438	5.561881779946934	5.0892246281716185	5.598445560042872	5.845198614354121	5.444157713901671	5.561493729744698	5.125814555479033	5.507951510191545	5.313223363381957	4.853141971655844	5.346213862416942	5.608204321221407	4.9685736946099714	5.897513944958407	5.127296922410404	5.456792263994808	5.558858029594708	5.518442635072766	5.500090260623488	5.547482096098879
pos_3387	Cyclopentyl[(6R)-6-(2-Pyrazinyloxy)-1,4-Oxazepan-4-Yl]Methanone	metab_3386	3.69883	-	309.192	3.6021721913253093	3.710718858775005	3.11016222619519	3.584276519529648	3.7438930640911434	3.4520092237558835	3.7654582885986314	4.13152764144649	3.434504488376928	3.7164371053450918	3.436024968381272	3.5540135093882643	3.541422021755756	3.814707374389516	3.9946091788728015	4.659335887571914	3.4446263525910936	3.736426705546148	5.556936407175356	5.379297179338174	3.7204130524731154	3.7156816559114336	6.749391983996098	3.4489322466406063	3.6058355577628975	4.210049649204023	3.499794737129351	3.5131082260626227	3.926784794221617	3.662640828272835	3.5794518032767386	3.5013403300846626	3.5605838044714653	4.75839294603439	3.662676491539484	3.7491232048393517	4.939694338694254	5.009925937599518	4.907342061449291	4.922781617743368
pos_3390	Asp-Glu-Ile	metab_3389	3.70417	-	376.17117195099996	3.778285994809096	4.400326849368819	4.580958901355081	3.598214109352559	5.30203424308351	4.1899297038447685	5.363711789446001	5.048398902180127	5.673767461545652	5.370064053510128	5.774624582879619	5.808513259780244	4.749995310136684	4.0796901570987885	5.248599544807892	4.324959398349379	4.3669534976926005	5.564186002096451	5.538157684974845	5.602183351805701	4.6116701818303065	5.376412281707452	5.105675920027637	4.356599150308115	5.193962614822898	5.209212893252985	4.068415209391263	3.5794231654669204	5.920654602258121	3.7738250479870534	4.408216398927545	5.228272016437948	4.023650273316922	3.738186175380549	4.705106820687144	5.038661817673988	5.270185917907625	5.202107384782456	5.197263934659839	5.222629197303617
pos_3409	7-Ethoxycoumarin	metab_3408	3.7260000000000004	-	191.07	0.5221649296939969	3.5331469706748133	5.852696503080143	2.5443599243703368	3.5663332317204866	2.4602485807948504	4.565633715067545	0.6382691012680953	2.048194793747438	4.7703295723884525	2.8072288097509803	0.5534090327188587	0.5140016172376284	3.661560486794084	2.847539418722958	2.9615260451342325	2.722122982201223	3.0130921566842206	4.100319111996062	2.9043903833922973	2.5886835847454046	2.693364701922758	0.6226800843498729	3.4958313493456386	2.6735660919979924	4.289036494032542	3.9754712529037377	0.5169939647080721	4.31738368884993	5.129575093925896	6.325019281080072	3.245310932725581	5.914742936498264	2.9209587661939915	0.5679502889406781	6.166053946373278	5.178428109440792	5.20147553992058	5.158574580072938	5.213867368412792
pos_3410	Pyrenocin A	metab_3409	3.7260000000000004	-	209.081	3.8216674983034986	3.545459652684898	6.3017438216928126	3.5526017207002165	4.159217462029804	3.5825108970343487	5.0382281548020265	3.4002820634586373	4.201297518791243	5.3002201116422025	3.027908258943502	3.492913002469708	3.6095561757852574	3.640608841490897	4.099003128539247	3.364270394640391	3.6527069876330684	3.2884853493501947	4.824414186514378	3.219509501249364	3.7656027456001167	3.8473753615305735	3.368885787902156	3.6300759762936208	3.5819303651006007	4.788184405734149	4.499317757537232	3.732643037806968	4.934434638256088	5.5651995249883885	6.764488033996576	3.472039874676104	6.361004528643043	3.4183431919654064	3.5145615979321088	6.6099373222897695	5.6250396661461615	5.681518336762656	5.625006034682103	5.67188224202167
pos_3430	Asp-Asp	metab_3429	3.73983	-	271.05499536599996	3.3977536021382533	3.2448899238824795	2.759227965793878	2.6483377673907853	3.7879165136019375	3.7557982917408976	3.5207372834707344	2.7944761412669443	4.941773615806949	4.326903115366964	3.37132809365082	4.067811932123656	4.2695078096682035	4.227517531771241	4.384022834452302	3.3985105787481524	3.1870320016485008	5.361517662990796	4.530855315460533	4.580220489857392	2.6050832056912108	3.1298446314434	3.3928556896506024	4.009615384303392	2.694477337047482	4.236619470148207	2.8337977539738706	2.6295851438295124	5.161201344473801	4.162455768985502	5.472712988345835	3.814466904216367	5.075189151152187	3.5906537832366685	3.0928988919222404	5.475415821581067	4.516943911483817	4.493976011465652	4.4723400918440115	4.5113440811712335
pos_3453	Gln-Ser-Tyr	metab_3452	3.75047	-	397.16903710099996	2.8905595737675145	2.7515572122272047	2.819070943927244	2.708152385197357	2.798261455519171	3.5285939190363287	3.8478943196275583	3.0097314610815644	4.3208174914414625	5.001178282543877	5.89746651894049	4.98849918798384	3.3729273561740296	3.7170671242697364	2.794128037117251	3.6930369530893055	3.153406224463725	6.689174902047956	5.580421753282146	3.167732692181992	2.6706208021608804	3.3029670980333616	4.9712475123753865	2.7939893623041034	4.235643911141233	3.7481573864705084	2.9270754754372583	2.689394208055212	5.6515849209582285	3.453051572915892	3.0648703406131976	3.597969888021864	5.2770404668567314	3.4293342640645794	2.9988330047142435	4.191504907019962	5.4863789680362425	5.486256722965144	5.49238152954959	5.495472137655286
pos_3462	Ile-Ile-Asp	metab_3461	3.75582	-	360.21264207900003	4.769230334421974	4.615444083732658	4.891127545528684	2.9391236386797988	4.59545123513813	4.94961152166712	6.020997503229794	4.972109861998249	5.355964373492178	5.588900397428577	5.477659649631229	5.2531999928743085	5.360299024385228	5.1246022432993685	4.768047277403982	3.422174331446884	5.648009416763263	5.569945134875264	5.342555744233435	5.273406338238998	5.247997621187551	5.524246253474578	5.454799644954004	4.2485861324969045	5.315203978288195	2.8159586678832387	4.532207595899014	4.921903585082223	5.320376233672058	4.274546935192034	4.448655815420625	5.149322650089396	5.531621653671831	4.59758344031706	5.636334601370968	2.9301020911289863	5.215972370107658	5.269699666931495	5.235013525581478	5.234242816972323
pos_3463	Asp-Gln-Leu	metab_3462	3.75582	-	375.18731386300004	3.3000171528520266	4.3037795177273575	3.519923688474244	3.1377911737762787	4.5098600377751366	3.7158262708560152	4.571946924420673	3.635246063225628	4.5168176655522805	4.554223028654033	5.290115941133753	4.558402826258397	4.411637372388342	4.471369780605012	4.098968056244598	3.7562404905736138	4.746795617019201	5.972544125699115	5.134328794564572	4.8289165758000125	4.114830125493628	4.299110114663812	4.602742849179554	3.623852765615963	4.610946129092849	3.603755455677715	3.2915664094679227	3.830528516977015	5.2444887229235055	4.012338901027999	3.8219463555157382	4.112433135646048	4.780192738169472	4.237432573308927	4.502429208004101	3.725820029990907	4.738155088031807	4.798333391411479	4.803270175476773	4.754475579148191
pos_3471	Humilixanthin	metab_3470	3.7614166666699997	-	344.145	3.9563278230671517	4.094592925591867	1.659398277445136	1.5510528201661231	5.233825197825253	1.7085940892657097	4.057233539774353	4.424868291140573	1.5181532813666463	4.246632361340584	3.4196272321815493	3.97178420249448	4.478277209811033	4.587923016473125	4.264454908345298	1.6784056306750388	4.739762913740039	4.67772764856691	2.936939253694728	4.52692615470379	3.133402779986347	4.669132875510228	3.805980865494905	4.358021482431251	4.900266343356519	4.723319516757544	2.8033351750512243	4.080887831677859	5.342189632722755	4.643829778567825	3.775331392291682	1.7257697864595518	1.6389108934929069	2.8573012042255006	4.064120241039915	3.833797043196585	4.463207546299472	4.398615103935907	4.3996450182456766	4.3477424256244666
pos_3479	Lys-Ile-Ile	metab_3478	3.76672	-	373.281	3.608489482878688	4.229197705079205	3.074644676684752	2.963640715976745	4.627461206929069	4.2986028306840876	4.5426479220510645	3.1099233339598475	4.2463228313310655	4.08578159664552	4.58536231282099	3.9828958239192143	4.150973961473674	4.8611583234733615	3.5162805795664616	3.0940523911368887	4.281255904756232	3.2374857342621364	5.501139354561125	5.15713259055602	4.298785162272576	4.37192836279663	5.112961047842493	4.082322727796714	4.234664493911973	4.409359635471751	4.242614541933151	2.944865812613961	4.977723333710993	3.0870779449669503	3.0765418975193746	4.6843363481140265	4.644064501733643	3.994140120442543	4.777650658482116	2.9546185921112027	4.558549142162034	4.55410548417132	4.5739290814241285	4.5353632280721365
pos_3483	Phe Asp	metab_3482	3.7721	-	281.113	3.6820808040355697	4.045425749325903	3.6484585661049302	3.213669162190403	4.801849854990143	3.156530163299172	2.8343962807669607	5.223317599091233	4.531031059279032	5.3988023665335545	4.082777001758012	4.9435614818601845	4.755016132074308	3.752441878186063	5.2287251705097475	2.6905985453358383	4.626954769335781	6.418873211418874	3.8644719321946575	4.642931436791752	3.7564591731164456	5.109251608375117	4.219800002553811	4.5757925025022566	4.616866774900967	5.0956014920325305	3.171206525153364	4.055808013066599	5.462177511889057	3.0980584932566164	2.900277509950367	4.240146593754541	3.6605585520094084	3.9882834521093655	3.8734904735488636	4.530500983221782	5.158990604219423	5.139205412091001	5.1382409085957415	5.1870476818150415
pos_3521	Val Thr Val	metab_3520	3.78803	-	318.202	4.89436266761984	4.570714695726127	4.125812018063976	3.85020341101292	4.8795377425222926	4.904125850638568	5.195151122856489	4.478131988205561	4.7326149894127	4.828685554184394	4.829896156215768	4.658916543126334	4.6232542376426915	4.753928283376166	4.466700804424642	3.9977440970499294	4.983104708976876	4.647144837742308	5.041607147267817	5.028249296528554	4.548579129436184	4.736904558294336	4.824193987044418	5.096347466655688	4.960331934306099	5.018521848467022	5.094150702327258	4.312021693676007	5.019945076228075	4.623751340990966	4.526568567772035	5.415617406810592	4.92079139728659	4.657111592724808	5.004578782113914	4.871192138825416	4.827710650925622	4.817126188807031	4.840126570280508	4.8322775783396015
pos_3529	Thr-Ala-Tyr	metab_3528	3.79338	-	354.166	4.5743714344933935	3.9208038286427818	4.016007126646738	0.5523821823440891	4.545650794092138	3.9990440381528503	4.890212305806523	0.6624847442083935	4.062592919507102	4.529469435722602	4.286111371197592	4.275053224835046	4.269534358964122	4.129424896934968	3.977247554874391	3.776103928478865	4.381010315000401	4.47067037228708	4.4872437700310615	4.382785717166545	3.3535862272794685	4.129372401957423	4.250411337213229	4.109856018729554	4.338613037077741	3.978958240845038	3.773891430970608	3.126741170561862	4.719331913867622	3.699966115238437	1.2669777749338975	4.53457009178939	3.7033705516373936	4.209380248831076	4.2078521158653635	3.4620733336269023	4.191460516225037	4.224583676852239	4.196573758427627	4.289291152362671
pos_3530	Ile Leu Glu	metab_3529	3.79338	-	374.228	4.853478681453617	4.588088606261503	5.275857941304452	3.853862247953386	4.829709364620659	4.672128424900517	5.831059873090265	4.887446160326413	5.361040125077358	5.579747205875167	5.326964651813832	5.27968895824662	5.182501626616407	4.637046557776771	4.816665385401151	4.068396607566302	5.561046387174182	5.7459237379915775	5.543495388371045	5.4913198642517	4.892911754296887	5.543686535844206	5.326397143094999	4.263887073614629	5.280380350178021	3.5917595743454536	4.110472577040151	4.821704296803083	5.4947307006579456	3.9978951788336814	4.411683176319909	5.370606696255011	5.125393442987843	4.683057803863234	5.521646576294234	3.342213268451208	5.206524275926093	5.225791939860263	5.241404331602001	5.249798083686422
pos_3541	N-(Pyridin-4-Ylmethyl)-4-(6-Thiomorpholin-4-Ylpyridin-3-Yl)Benzamide	metab_3540	3.79868	-	391.16071941800004	4.00539211400599	4.521318582508973	1.2141653101919714	3.7406417132092233	4.555242537684125	3.817541888476263	4.30484433413651	3.6541475002157813	4.436514628716758	4.582320979473853	4.621144348494344	4.800637875827307	4.419584513522427	4.366439678461826	4.290297429120544	2.9744091871154192	4.602604288653686	4.764575397455206	4.2656530238046635	4.334039222476571	3.9155516296974997	3.952553545755384	4.1070127609087415	3.2470518450365287	4.731251623437566	3.991776596401775	3.91066113118612	4.430884969961989	4.384910583478751	3.5980576145234133	4.475742640469062	4.484392741080566	4.4638116865229645	4.097105414253378	4.532750592929808	1.7862070178083138	4.381086665231616	4.316726312894833	4.417581029497538	4.40031980482829
pos_3548	2-[(2-Hydroxy-3-Methylbutanoyl)Amino]-3-Methylbutanoic Acid	metab_3547	3.80402	-	218.13846541900003	4.885566802990414	5.430778912468576	5.332844692992927	5.31878713264038	5.050756868332578	5.515479466866057	4.807544096100896	5.23928179898114	4.3596486657103934	4.7357315507463085	4.355961431508594	4.7886478135924975	5.141781958186838	5.5376636730042685	4.844796481070335	5.323273128615808	5.180571397875669	4.5073934990910045	4.69172879330814	5.059093313695733	4.9345402505077285	4.4219826948323675	4.9922367817870965	5.4616170996022815	5.107476797031993	4.502725978027315	5.601547115740807	5.37713487403007	4.723348749706678	5.897625344024331	5.576593179128956	5.176414923185171	5.052013330055368	4.728903270660867	4.650121456565264	4.838095527021429	5.213435184004338	5.214900689078744	5.2205702903553215	5.214718667704413
pos_3552	Dehydromonocrotaline	metab_3551	3.80402	-	341.17	1.3250160994189593	3.0815339572717817	0.5535043831425673	3.9637567828691833	0.5385907746334649	3.6395710407244772	3.878548597954958	2.8377456361408067	3.064513564381886	3.3136150341479964	3.09601108219418	2.7329136244652688	0.4611723150569301	2.887601115328167	2.6695307412005382	5.3825786888966975	4.475835108654851	0.9536246352522152	4.194467065049899	3.1511075993589057	3.197499049472067	2.603014372047633	3.8366494529083903	3.5389595971954813	1.0539330302089354	0.3982781123913552	3.986554767774973	3.135529847155597	3.0506726557867907	4.246417737202568	2.9639692446536112	3.174536151416956	0.5385085877250857	4.989855195192045	0.5122151463580034	2.8209182008453797	3.914893279991399	3.980662583961045	3.9867053378961237	3.938063739109181
pos_3559	3-Aminonon-5-Enoic Acid	metab_3558	3.80937	-	172.133	3.851320249515065	3.9689203226615537	4.110787614152315	4.168174281381888	3.970549166170476	4.347755697462392	3.742420347946728	4.044659278928865	3.429664339401895	3.5910872842348933	3.0309425112982864	3.584549322511603	4.019214922656524	4.354577652365748	3.8125872113804387	4.109237783207857	3.9614397255482414	3.2290146618786366	3.5035552907563785	3.930498191251557	3.7963316823290887	3.2967419161915528	3.89997432579145	4.2289608133208905	3.9282356835026913	3.5525567953145023	4.411333334621194	4.176384282151414	3.5177362658529394	4.6816615272439615	4.376687471678173	3.9597351995420667	3.9376843284009175	3.6008440837472566	3.6804381620416624	3.682588165466784	4.0788598993738425	4.0529646778985695	3.9815308000327714	4.04614412984996
pos_3573	Cyclo(Arg-Gly-Asp-D-Phe-Val)	metab_3572	3.80937	-	557.2775688730001	4.383470969919856	4.749758334268836	3.461911715040308	3.1771952655280096	4.061534108775136	3.583434290902468	4.28013981669448	3.593277278893172	4.358089524245548	4.5604753295494485	4.651433270861414	4.149849316386351	3.5382632290422733	3.5454817323596286	3.319469820692741	4.971963731118526	4.118664568949837	4.428093384498637	4.7603857741636215	5.150192442621632	3.297175347053284	3.6616815548138053	4.178771112487277	3.3040154094458885	4.28831131017092	2.0021395371875204	5.731510507200952	2.105747309310885	4.248814466104847	4.563414024436364	5.871412832170961	5.473428819462236	3.9358689407871688	3.487213820484941	3.9981016446986253	4.5270799304341445	4.517001809234494	4.531382457734296	4.628507190300659	4.629582475709112
pos_3576	4-(2-Amino-3-Hydroxyphenyl)-2,4-Dioxobutanoic Acid	metab_3575	3.81467	色氨酸代谢	206.045	4.462384806353411	3.187072973359666	3.7469752708088033	4.791404103994193	4.893531796898978	4.969364811918158	4.764517378197404	4.494569684225693	2.082859736702983	2.280735141337285	4.761206561134691	4.588443819086729	4.443300830970425	4.564856433521894	4.8778997081084965	2.2461508801606382	4.85653603039422	4.535195236266034	5.109614450832062	4.823741792250535	4.859775711944046	3.0365851851795544	4.840223769279525	5.057800300148947	3.7534542397383626	4.169243552490504	4.70632848353444	4.607202523911093	3.7740751488533824	5.627321291918403	4.934892146275783	4.967281091635705	3.7277463047454216	3.1384341569342844	3.7082548668330566	3.1790155203478663	4.7256420599770905	4.730466013204817	4.7438557455578785	4.7297466119108895
pos_3582	Desferrioxamine H	metab_3581	3.81467	-	461.26	2.9918619552375536	4.081464306866551	2.3378195960185497	2.227290304082854	4.075649583851399	3.7147301615729615	4.754285189579076	2.3729710021267656	4.427233832650276	4.165767634354454	4.22797165247032	3.0368371262376384	3.766986004073911	4.529744357150777	3.10115223696208	3.0059434143458863	4.408457737609472	4.015967768870629	4.713755496945407	4.487390996453496	4.113007905861436	4.197437749779551	4.512936835019044	3.7120602049960767	3.921307235602068	2.8936523748512486	4.6564530950847685	2.208608316150793	4.733595678776328	2.3502068373137983	3.1023302163136535	3.9201420993781713	4.322032826066022	3.1166513513363685	4.4597776497880615	2.2183123312538062	4.194807760895932	4.133696429620624	4.004627842970443	4.122959588129565
pos_3583	Elastase Inhibitor Iii	metab_3582	3.81467	-	503.22847373800005	3.5727188532805627	3.938170040102897	2.0815988104044787	1.971536264794499	4.2545723419687285	3.970040626944841	3.8969122991655776	4.427186190523611	5.218414086421092	3.60287713203233	4.568500074445394	5.052388291009264	4.567589829451474	3.725474954148578	4.324135783497565	4.634440761296731	5.442633817079519	5.432279685554542	5.6604643782313655	4.268456711482743	4.047010929839709	4.174561832993022	4.300742772891462	3.72056335610522	4.433334216943791	5.054420077356383	2.12402023290688	4.4113206702273615	5.852352273202751	3.0512881836925243	3.7062919011727855	4.086087219577624	3.176805866212568	3.9078634798225145	5.20099309229721	4.362204758543989	4.772287565103071	4.790916970994176	4.860368660572017	4.92704445370567
pos_3599	3-Pyridinebutanoic Acid	metab_3598	3.83068	-	166.086	3.740425728939864	4.174342457012118	3.9152347658291857	3.8678978335707184	4.312507987942996	4.063831473461232	4.373477644610978	3.9103864543076736	4.296295522007228	4.221185104247288	4.285756674016748	4.199518228665736	4.080647748013645	4.096171021807846	4.270208662856796	3.8435564165866425	4.1688554265993565	4.341916360580399	4.314792585583889	4.380086058068069	3.9014962843633576	4.0300541280695485	4.068876490159981	4.06922162604752	4.288886608629162	4.130152388006655	3.99366535349596	3.868649046548523	4.391212075767447	3.9113803538357907	3.7346146218757568	4.252657555119951	4.175695015611482	4.202270173254692	4.197721074317972	3.934046112140845	4.116943092016434	4.144772636216417	4.15588142841621	4.170796303760416
pos_3601	Leu-Pro-Asn	metab_3600	3.83068	-	307.176	3.183197477198385	5.914689342394451	4.551507342085693	4.074058302497411	5.383871998394411	3.4123358623528475	4.887485631630988	4.097753527949783	3.7094824003980778	4.0893177530375855	4.886160656922341	4.8397898110595206	4.974256858734675	5.6346391606352695	2.756249346474329	3.8231159984324656	4.67487	2.8291026920220235	4.711389629771444	5.1161539611335325	3.5765578380298013	2.7086519874960744	5.060859975585375	3.7282342373047688	2.901550159228273	5.035277465870839	3.455042890970533	4.971971535423085	4.564041603817378	5.535894930879471	5.21356494544668	5.626582813763528	5.585827028970341	4.025097661719508	5.433302940952069	5.371675621679174	5.023662509630271	5.027342482275059	5.044325189310636	5.050752165795328
pos_3603	Asp Ala Phe	metab_3602	3.83068	-	352.15	4.5664831915079205	5.215256434671062	4.548734893926839	4.694072597461457	5.281040747822907	4.933588568615452	5.319795752368995	4.700333045232092	5.158144418189414	5.252620333002256	5.371809106290033	5.244193791343676	5.151802835021453	5.050847706973767	5.0513967416363705	4.46529267795309	5.1503415369675665	5.33290667893112	5.180198886040474	5.277860847858974	4.758957326624278	4.960633689787667	5.014381093606594	3.908095283239872	5.249423618035591	4.108085036592678	4.698632270210592	4.685525453535458	5.3704293945395785	4.165647401581468	4.423092474470977	5.140013336351762	5.133226651821292	4.560040926879262	5.20035316919708	4.4001774349491205	4.990544673596267	5.031088303604957	4.996095958672387	5.011467384848807
pos_3606	Tyr His Arg	metab_3605	3.83068	-	475.23931863300004	3.645815492843015	3.973485458573432	3.1309647231795035	2.9244942616783884	4.587986657445769	3.9944484466729904	4.74254408874043	3.358171013034392	4.959961587105542	4.403151681001863	5.019789095617013	4.614605475894023	4.1276980823506815	4.239001047257788	4.06912822209735	5.079917445476908	4.474326057736239	5.130458121342005	4.9218812346679295	4.472341649003088	3.7343111694044735	4.77543641531928	4.430036670282162	4.315017959575995	4.507956776984458	3.860572380807076	3.973590635552463	3.6804266292174384	5.312052749133829	3.9761076768601935	3.1959564520101447	4.1458675425827165	3.831868278573088	4.074046464035205	4.630040553566334	3.641197327556632	4.504496177831611	4.616641290804309	4.5368687172145785	4.5799852552833045
pos_3615	Pro Ser Tyr	metab_3614	3.83603	-	366.169	4.149956173401218	4.0936104150472215	3.474074992155564	3.992416699938099	3.070424044635152	3.5739989299690498	3.556305284510192	3.7100713777079415	3.593302791264847	4.075494774241879	4.076654912248571	4.161041195396144	3.825446536302196	3.78930199189904	3.2972915626289154	4.60881585017558	4.095127660467571	3.947692030505197	3.7956843300220986	3.9854759892890312	3.0989640727962797	3.007501245516244	3.460845608498035	4.2479647523460535	4.023459594837392	2.6545181286294914	4.074341059385038	3.989219605631407	3.9460471155026937	4.736740133682032	3.724824456643137	3.8821647536821233	3.3960252399244903	4.653742978836815	2.8302044638809782	3.77766444605282	4.0410694214082685	4.041054382231412	3.909669977638643	3.9884276287216425
pos_3623	Dl-4-Hydroxyphenyllactic Acid	metab_3622	3.84163	-	183.065	3.5136051075447163	2.3136879984421497	4.46552259736441	2.270424197592265	3.602110863622389	3.9211805268239055	3.663578752608297	3.238782785598997	2.2367238656568875	3.850145670434368	2.4134600288656523	3.0882192023520285	2.4010058304387085	3.1174541003783025	2.6081965152377014	2.518909196260437	4.0205621181925295	2.4288086768686212	2.4094275141254684	3.258946746078762	3.5514640212401805	3.7632009778966964	3.6886653735425097	3.8105181010160964	3.144142434180129	2.1478596816655533	3.002144401040535	3.6115462952733886	2.439294256392911	3.795136527198682	4.049014149995446	4.0640486135132186	3.70513620206995	2.902895727231502	2.4213042877221733	3.9598963331979062	3.6425214235616807	3.6239202557789287	3.6240175756794857	3.5346400759899157
pos_3626	2-(3,5-Dimethyl-1H-Pyrazol-4-Yl)-5-Methoxybenzoic Acid	metab_3625	3.84163	-	247.107	3.281352159823433	3.331602086285614	3.842711899561004	3.370399192979096	3.1907498448578	3.6959107551755137	3.1388374667377503	4.071962847369218	2.4594694318763266	3.644367485125551	3.225754941315344	3.3854872666822367	2.4702196222903794	4.326221685150854	3.38148436454852	3.3267024942153385	2.899099317670188	2.6519173265363896	2.6325063870850958	2.9854804495816314	2.523943890542432	2.5315704129466483	2.867039057000052	4.240356678837145	2.708898405083532	2.3703744483899483	3.620170830809753	3.705404760882386	2.87155666064979	3.9215478391965393	3.6316397413961576	2.671633010781504	3.711709477581047	3.4345306868427543	2.5457643076144	3.651000291098278	3.5242288860994435	3.599143425975968	3.5154113279273016	3.630694336493791
pos_3651	(2E)-Non-2-Enedioylcarnitine	metab_3650	3.85232	-	312.18	3.5929774790895133	1.8399638659236428	3.1639754065735066	2.9481523587050686	2.888279437026441	4.445105087566233	4.374592709884872	2.9451818400255587	1.7638112234233143	3.250584536161871	2.7912847338668443	2.8383929185116683	2.815389741842808	3.729532244572621	3.085074199162935	1.9258705365074107	3.3753078013131907	3.3383459860481404	4.2391127185342725	3.8817121643421073	3.3256522061409	2.6137749586131735	4.830848654265266	2.0048765050703348	2.1765005031413063	2.289186448850689	3.7815174639171545	2.0257728659883316	2.8220132750468228	3.476403573640317	3.5769547361762912	3.0766624221930807	3.0813736105739777	3.8143718626927834	2.388109343697505	3.8574605232363286	3.5150478623196912	3.644587983103413	3.49516106441176	3.5746230699622514
pos_3653	Ptelatoside A	metab_3652	3.85232	-	447.18812823300004	1.3053917896160012	3.5287131885178247	4.376852527208107	3.1110096153364744	3.8372169592459233	3.2355354528745086	4.094943771297759	2.25682749114622	3.6249613319117175	3.32887631648072	3.969693197849893	3.5686968874886484	3.7829213774463337	3.3400052059883576	3.6212676131163652	2.8255216796435696	3.9087689472733347	4.058296751517346	3.9006829398013423	3.3886596070742305	3.0207227627916744	3.669186950530782	4.342818254729561	4.320916744487666	3.8100495954481133	2.7675529123666247	3.0606901064069	2.8545655590676104	3.802550255864259	3.3065778245269364	4.807808964929833	4.113497359947012	4.6763288601960085	3.55270412628948	4.254011637418334	2.809890735197192	3.7057822731667134	3.6920846966686094	3.6336428136040486	3.648639292775569
pos_3660	Feruloylputrescine	metab_3659	3.8576833333300002	代谢途径;精氨酸和脯氨酸代谢	265.154	5.188912740410572	5.579198726602877	5.7319315415051	4.903419676656863	5.959989215345415	5.598520073801796	5.881224366210233	5.825786823134747	5.5411673701637945	5.821472250281457	6.904155470142538	5.781819739682442	5.674782203052009	5.600404484897075	5.705242716740452	5.003195611858849	5.767746276020385	5.6114237289922215	5.9178622352890375	5.9178650061480775	5.541231288820046	5.847567744671383	6.119849318925737	5.647214988333293	5.639488357713853	5.521407811876791	5.511542712084823	5.414111244699041	5.926801903276045	5.459330651225299	5.265953157853831	6.1211957895318125	5.66864675460917	5.610852617710191	5.7442726727496325	6.208816565698588	5.901736239900202	5.901710948675871	5.905524702022412	5.915568842189237
pos_3669	Phenazopyridine	metab_3668	3.86303	-	213.102	2.5057402749016795	3.0652523875821145	3.771951452682796	3.7613378975338168	3.3698304861734547	3.7254406436933816	2.61454364697247	3.3906801667150934	2.483307399517816	3.2911471631227407	2.6604102316380294	3.0672998515603656	3.0755960737050816	3.1643858323110283	3.317007218545029	4.477198898336324	3.0951621454436875	2.6757842198585604	2.6563709091761942	3.4451615798078565	2.47387122866722	2.7298816384216535	3.309162417605305	3.1707417157010003	4.351429770844457	3.695611599647424	3.606960020608684	3.139376691694552	2.6862866022120486	4.5969634756370965	2.975580918812049	2.9615252402078576	2.996537458425365	3.9096053054095288	2.886415302455076	3.707631372375698	3.42974258368651	3.4276017451980456	3.4350591363286425	3.1671899719967183
pos_3677	Lys-Ile-Leu	metab_3676	3.86303	-	373.281	3.669945247846389	4.240806595994932	3.9531115102514045	2.8248409013094697	4.757528922127932	4.240491433935206	5.057200306961788	3.063346281875093	3.83046891841975	4.127533472867864	4.389986374319882	3.8002756969344738	4.171493176256804	4.790176436844903	4.288943163101031	2.747320686372794	4.2477416846993385	4.037981798566063	5.141685505523506	5.046319267924006	4.1962843645274726	4.3802640999418845	4.94299845136535	4.179925243931165	4.241715234651719	3.986745125784781	4.374081322257643	2.5733945072190543	4.7565783820851015	3.1559002023456526	2.7048959770460788	4.566681986202836	4.542182505176932	4.399059515019141	4.45869443363496	2.832530095397753	4.481185110935825	4.4528823268761775	4.414852871344352	4.454385134870184
pos_3684	4-(4-Hydroxybutyl)-3-Methoxy-5-Methylbenzoic Acid	metab_3683	3.86837	-	238.118	3.41781069399134	2.4054802692777453	3.4864789705742734	3.236225733605936	3.6492398199945217	4.633950987694195	3.6759837525363768	3.9823412671457294	0.4539855582101239	3.679253845164961	3.082357553914817	0.498255193811786	3.509167218733676	4.15030266942012	3.4286009003963867	2.8417371983046915	3.1607026205302566	3.217141666097697	4.150043473800537	4.091758438262222	3.472573026675791	4.226297392189029	3.447502910910881	3.0109637933376163	0.507595160105818	0.3981298403965995	3.7137889765877374	2.6989003843351638	3.725706435010239	3.5025350667685906	3.8873038809510354	0.6031658628659162	4.030835192043827	3.6236139039088613	0.5120440894760772	3.1861705848038384	3.7458674919098485	3.724319605449757	3.734414898257169	3.765960320708444
pos_3687	1,4-Anhydro-5-(Benzoylamino)-2,5-Dideoxy-2-(3-Oxetanylamino)-D-Arabinitol	metab_3686	3.86837	-	293.149	4.024267912433757	4.505838173574143	4.281893478006195	4.237685644643785	4.634350268474724	4.594497376170639	4.827399147720051	3.8135468428332233	4.328606529803396	4.381592540693204	5.035108510988969	4.2916054600470375	4.253907734715265	4.769737949698573	4.05978718911211	4.714242801977345	4.691386036069151	4.2928597569793485	4.665629125386764	4.653513337481441	3.928808636880981	4.158609119852873	4.409206242106199	4.368282878727114	4.325120865400089	4.004147764451904	4.817333653387465	3.5175542656166106	4.858202765214352	4.565781930208286	4.160235373849654	4.787054005181798	4.468257860389072	4.998407770541523	4.402692732325401	4.389001155592936	4.558060215657776	4.506706392784863	4.580310297645594	4.583587331270143
pos_3725	Arg-Ile-Leu	metab_3724	3.88972	-	401.287	4.074501003033573	4.339586925327239	3.8031177562921	3.7499582827795175	4.628000931224629	4.221978064389924	4.677180594915254	2.982043285762194	3.718005164888506	4.088088839549753	4.398014381625663	3.5508706230338576	4.0297789176505185	4.643870670158671	4.0377100730884905	3.5117387109988902	4.1101058764441305	2.9081157913302205	5.113760865082548	4.979709409566117	4.249276357308913	4.147807683543872	4.882983090779209	4.261925668014392	4.187470195880357	4.079816112985797	4.544351380647255	3.549980171716907	4.593901189550826	4.106344125856803	2.862085491837956	4.820995903377522	4.552486034241078	4.382249242786677	4.295169086278073	3.9034203116826256	4.457931965048648	4.311433829020087	4.348351790942292	4.427965395150569
pos_3731	(E)-10-Hydroxy-8-Decenoic Acid	metab_3730	3.89507	-	204.159	4.044728458060471	3.6809923597227225	4.636346272487633	3.2567222464633607	3.744020799478825	4.585102103181338	3.9089139444918484	3.9797007747874353	2.2341992890834863	3.8512579929312087	2.4109305157700622	3.1798876113657704	4.467795366559868	4.400227318444866	4.5255183655747615	2.9692885562078963	3.588856904820739	2.447988554697498	2.4068980927218124	3.5036748399151825	3.5022496526699545	2.3433999971113755	3.4958487683793225	4.231406130827483	3.0652968859990497	2.3032866568816517	4.1933956447526874	4.248094778733346	2.4367641756480567	4.5099204929569945	4.353493830618117	3.8080537904266163	4.211239284626848	2.3936985322305864	2.450455076948647	4.02311476052234	4.067848922784243	4.016723071091942	4.029971116741708	4.04228311735287
pos_3753	2-(2-Ethyl-6-Methyl-N-Oxaloanilino)Propanoic Acid	metab_3752	3.9004	-	297.144	4.594263250718381	5.691440477992996	7.503549496628858	4.968355792709039	5.6351536112693985	6.127038800711841	5.360089585099876	8.189989251306486	4.79399637725324	6.743761272548545	5.425811367768056	5.7869351870048495	5.2795359843257454	5.331486707062889	4.99918281846125	4.521489279796233	4.893393792500975	5.851161372423133	6.209874128033367	6.116029315904956	5.252589930109906	3.645451328469131	5.2001403702652285	7.337959055542518	5.149037613828443	5.049960397195236	5.4543526016656045	5.24934168396103	5.012307319764377	5.683203052328402	6.38916867212956	5.908368495698071	4.976957291911485	4.867871340147378	4.205696515811044	5.47156291522407	6.749354795027852	6.741138889354877	6.751773499738017	6.7542731874433946
pos_3757	Thr Pro Leu	metab_3756	3.9004	-	371.22844086199996	4.321510459122546	4.33985964595017	3.5489614201196247	3.816779271938102	5.136914090156152	3.9499716619205687	4.403697873638107	3.828121951729341	3.917716833112859	3.790685117702025	4.211473883538519	4.206100225395043	4.366336631144006	4.665972872159603	4.131921115937104	4.313718882705098	4.220451854459583	4.141611647905283	4.291609500522947	4.579616124773714	4.035389927622433	4.104468263986057	4.485241566330232	4.725653210970716	4.037139513639642	3.853356366295448	4.650611430098908	4.232185382926215	4.5076527437425575	4.225566277370889	3.680627502092952	4.67943532551607	4.388787253059477	4.919745059626269	4.174026318346578	4.210168782833809	4.382969589492962	4.411358740864875	4.361444511288124	4.381236857843492
pos_3758	Asn Asp Phe	metab_3757	3.9004	-	395.15594908699995	2.3858180702643046	2.5602808210808448	1.3571291830484975	2.9727920610969547	3.9105701067379486	2.36188176564552	3.2770320731648748	4.085094040536829	3.828774982988569	3.701809276160229	4.0884006296895095	3.6772414690981203	3.023204715687345	2.8052444111133834	4.61634128863596	2.9381900663375937	4.017017023875188	5.7136780248215695	4.042616258474645	4.2701955039481305	3.8471150983374014	4.382393310646896	4.507067768693121	2.8887621483913253	3.20617053299184	3.644612070195519	2.861918733038299	3.1194715551279617	4.426925167062123	2.452098328085161	2.9215696762481542	3.5084726536339925	2.4922974057316543	3.454950151419009	2.6533447917961968	4.3705997424497465	4.206638584074458	4.26189035563036	4.283900414808862	4.222325168531543
pos_3777	2-[2-(4-Methoxyphenyl)Pyrrolidin-1-Yl]Ethanamine	metab_3776	3.9111	-	221.165	3.9223527131866627	5.497661106065639	4.479610473108819	3.9764821392491103	4.500698811367875	4.091963020556209	4.5188850939095815	4.163825794484001	3.7705845649325513	3.469175598523819	5.081195487838994	3.9946433313481866	3.4847247114902906	4.221768192846464	3.609149993148812	6.360616543555857	4.819057187056115	2.7430756504946907	3.3710786698154642	4.14744300644876	3.5783666041000197	4.043215082322718	2.971832472131552	5.225059942222165	4.1368829681989485	3.3661858724511178	5.204779106430566	5.046757875178859	2.753581181630896	4.870071337467917	5.07603354536805	3.706037815317024	4.798588273840542	4.383686153976222	2.92181349147561	4.1413682336861255	5.037251013824164	5.029321592327391	5.025971075696604	5.068048794495152
pos_3782	Ser Glu Phe	metab_3781	3.9111	-	382.16052666800005	4.614487935860915	5.025873081963903	4.663667301257784	4.021485598369028	5.300497698260521	5.04572141604534	5.275152462419415	3.822685687382056	5.078285998356444	5.110650961081887	5.287656807627396	4.829479872296548	5.051214598772249	5.105637479873081	4.778813302862416	4.523175716867601	5.013291530437494	5.189241525800472	5.272235299514348	5.100821593634006	4.852971392617787	4.972372282087076	4.927705976893323	3.7863481800662	4.97431181371635	4.127724447120803	4.436805165041209	3.9702025516790505	5.39091291320363	4.110116862263198	3.860987699249137	4.975183113153578	5.018989594254299	4.262659214205281	5.0599359261882135	4.378881587829532	4.963986154860931	4.9335993577681725	4.993277585271469	4.9561855550194505
pos_3792	Tyr-Ile-Ser	metab_3791	3.9164	-	364.186	3.818310532370623	3.593479435294515	3.5131927814988466	3.3506039616560384	3.671440699646404	4.226442483363158	4.9985959409587855	4.143206493088901	4.064528275944944	4.506684680421352	4.653340248822467	3.6950597044204243	4.307077220396763	4.312111353867138	3.2259083363650496	2.5041281575866905	4.272567544988136	3.424813146188223	4.494923979663948	4.919058050748895	3.9879863116733887	4.392961870484132	4.558444617162109	3.222803841736911	3.9204882619626775	2.8176785701549467	3.6262810169715993	3.4999520796089443	4.604279081826392	2.49717008540994	3.079504713573782	4.590474835576346	4.0981826658080855	3.392072293139976	3.9238451528220266	3.2755670028048547	4.305767458514819	4.255902892705541	4.274952048962221	4.193849007716151
pos_3793	His-Ile-Leu	metab_3792	3.9164	-	382.245	4.129619172005075	4.257270604400308	3.476943025592832	3.835048745490688	4.500432699162904	4.488262525635244	5.027740080113022	3.0879343167163293	4.878284233504355	4.836468981121668	5.13625247312913	4.755425399370115	5.2863546556806655	4.9784715119193965	4.37255764736883	3.6388701502212575	5.009772357847873	4.819837794791001	5.186392245320217	4.811076191057401	4.661490516255445	4.959460428575153	4.9596249234520515	4.5861204323865925	4.534781036252186	3.7064936613110464	4.47720328194653	4.3622981922845465	5.1203607345101485	4.376557654569398	4.460642323574541	5.021533839814438	4.8394036968120115	4.454231757548187	4.930330794874421	2.9326371087927576	4.733317207083976	4.726240362756087	4.753636078089307	4.764450147246638
pos_3810	Leu-Met	metab_3809	3.92732	-	245.13150690700002	3.0262108741821376	2.2281968657219453	2.2954511318011765	2.6480970152493692	3.39536	2.6008830088070747	2.480640761949775	2.330586568513904	2.1513221259235067	2.5717080885880983	2.5475293370932826	2.2173967800526846	2.574384502765678	2.680673019863335	3.4483627487340214	2.821563095793342	3.874796808940924	2.8564066716590637	3.4576725509517208	2.562221517893136	3.990806537144541	2.2231839574026657	2.807367804456284	2.844832428507455	3.0754263150386727	3.660537779333432	2.3380038586302168	2.8812202765774497	2.3536873024348246	3.4321587508832594	2.780932549772769	3.024080409530707	3.0998747425645603	5.542938732492014	2.2373352584874464	3.5729110508816717	3.7073962437515777	3.696652795283765	3.771841660534796	3.6886012756512887
pos_3827	N-Benzoylaspartic Acid	metab_3826	3.938	-	238.07067582599998	4.698376715208679	2.522141337098464	2.5895778169224486	3.683361742548175	2.5687908739110474	3.2264003210540246	2.8311769118576415	2.980943360428145	2.4450205284918445	5.07433865709663	2.6220791656248785	2.7025930694468587	2.8592921014879398	4.24963460676358	3.726663934808293	3.6221896649683454	3.9500436632227816	2.8223772205475	2.7443006717400165	2.6789258727349106	3.1434808800936738	2.517113680149459	2.604491046471088	2.9418272105123497	3.5253437243853933	2.3559371994658322	3.5720293474287685	3.95575018641595	2.647950458755734	3.820971417871801	3.573800529960128	4.0230627421308975	2.5686755328635966	4.121466498789688	3.3300245517013054	3.5306481114312094	3.8059513215874974	3.7660430888170215	3.7702214503958653	3.8983667614431887
pos_3835	Vomifoliol	metab_3834	3.94333	-	224.139	3.440910810989867	2.9740473424378786	2.8325906523809348	3.197360695318628	2.9424419257948773	3.232395829789424	5.6467930851875625	2.1563762096305217	2.208458992143567	3.5826303568243163	2.033044428208588	1.9231438325485064	2.7874891343382058	2.781761241300817	3.3450902273421663	2.0200098118646173	4.2965381895248065	2.048311200128849	2.963310431434895	2.263068049990736	2.756346638269918	3.163289889049285	3.0928527917009485	2.8719740841800045	2.741507494410901	1.769427805421986	2.280814565235072	2.6033381749882176	2.058742477344905	2.0130968907723203	3.0490727040774686	3.077014863987744	3.479872049045288	2.0159074669372035	2.3576845424648334	2.5113994504537334	3.9135318596334336	4.01472777438582	3.9650535150653496	3.966695950773119
pos_3836	Thr-Val-Pro	metab_3835	3.94333	-	316.186	5.349046174771361	4.970297291068106	5.4952441929528	4.739845330772425	4.9787253948609225	5.44710239198527	5.767650320789242	5.759332550787464	5.652220288943695	5.68853453823953	5.854755075525416	5.850190489842204	5.6701456599012205	5.519233363004021	5.739560997829457	5.228875219566326	5.547453134343008	5.716515563230216	5.4815475863128444	6.121046876237003	5.452094037619137	5.213712627806048	5.56184617951221	4.779234029162653	5.3698034239902	5.069981076512422	5.535679912830237	5.051747094994738	5.677382329080099	5.375437574948944	4.523427942516912	6.111449546241209	5.789414404132451	4.964023055879731	5.53930254768553	4.728153434418728	5.559954536206597	5.532516700076381	5.567663542632478	5.562527336371812
pos_3843	Seryltryptophan	metab_3842	3.94867	-	292.129	3.683593061335902	3.7431590079529538	4.043080629273762	3.140274349275506	4.570374428659679	4.60152105687536	5.2434916358281365	4.3914812703552135	4.941362627266567	4.989813700586477	4.767752052287823	4.913324132800238	4.160278820808446	4.619773427686126	4.098514325681015	3.4689614417064867	4.9431872305797775	4.662449250830655	4.418437743870365	4.699448181163159	4.513274130377104	5.009889863682201	4.948948868039254	3.904190267394232	4.5794025013584045	4.431063314102594	3.3899700499181384	3.8625909775639187	5.192277211188507	3.2728717886355723	3.888256023009345	4.760839618889588	4.474548007287833	3.9193513283967487	4.345874837908333	3.8276042395179393	4.693457610393706	4.632930419105873	4.619028368253859	4.6386243600008825
[truncated: 3,938 more rows]
